# Supplementary material for: β-Catenin associates with a Wnt signaling mRNA network in myeloid cells through canonical RBP binding
Source: bioRxiv preprint, doi:10.1101/2024.01.28.577638, version 2 (2024-12-16)
Supplement: Supplementary data file (beta-catenin RIPseq) [file 577638_file10.xlsx]

## Sheet: K562
GeneID	baseMean	log2FoldChange	lfcSE	stat	pvalue	padj	Symbol	Expression
ENSG00000276700	1124.64	6.11823	1.64735	3.71398	NA	NA	RNA5-8SN4	Not Significant
ENSG00000203783	56.1524	5.97054	0.823799	7.24756	4.24338e-13	1.55053e-09	PRR9	Enriched
ENSG00000183779	25.9963	4.90784	0.877367	5.59383	2.22115e-08	1.43225e-05	ZNF703	Enriched
ENSG00000118785	120.818	4.79789	1.77213	2.70742	0.00678093	0.0456869	SPP1	Enriched
ENSG00000108691	53.5225	4.48932	0.761752	5.89342	3.78291e-09	3.76984e-06	CCL2	Enriched
ENSG00000275215	1018.78	4.35329	2.28412	1.90589	NA	NA	RNA5-8SN3	Not Significant
ENSG00000155465	46.0543	4.2928	0.697883	6.15118	7.69086e-10	1.05384e-06	SLC7A7	Enriched
ENSG00000054277	40.9969	3.73346	0.630609	5.9204	3.21153e-09	3.52048e-06	OPN3	Enriched
ENSG00000183153	25.3505	3.70328	0.806653	4.59092	4.41297e-06	0.000597223	GJD3	Enriched
ENSG00000162951	19.9113	3.6186	0.777033	4.65695	3.20935e-06	0.00048193	LRRTM1	Enriched
ENSG00000122861	25.7538	3.50019	0.692831	5.05201	4.37187e-07	0.000116889	PLAU	Enriched
ENSG00000078814	28.3747	3.46813	0.62596	5.54049	3.01633e-08	1.83694e-05	MYH7B	Enriched
ENSG00000171621	21.6618	3.35231	0.684839	4.89503	9.82887e-07	0.000204498	SPSB1	Enriched
ENSG00000136295	581.144	3.17513	0.638143	4.97558	6.50522e-07	0.000155022	TTYH3	Enriched
ENSG00000171246	20.6812	3.17229	0.832988	3.80832	0.000139911	0.00474833	NPTX1	Enriched
ENSG00000225630	393.319	3.12434	0.500024	6.24838	4.14734e-10	7.5772e-07	MTND2P28	Enriched
ENSG00000180535	25.5919	3.02739	0.760881	3.9788	6.92652e-05	0.00303714	BHLHA15	Enriched
ENSG00000129538	36.2221	2.99464	0.663051	4.51645	6.28841e-06	0.000725617	RNASE1	Enriched
ENSG00000254681	24.5859	2.94929	0.872375	3.38075	0.000722871	0.0120099	PKD1P5	Enriched
ENSG00000131668	48.3646	2.86535	0.645039	4.44213	8.90728e-06	0.000864085	BARX1	Enriched
ENSG00000225972	18.126	2.83508	0.822775	3.44575	0.000569476	0.0105807	MTND1P23	Enriched
ENSG00000196739	41.0054	2.79569	0.634906	4.40331	1.06612e-05	0.000942482	COL27A1	Enriched
ENSG00000129757	69.4692	2.79361	0.518077	5.39227	6.9572e-08	3.46841e-05	CDKN1C	Enriched
ENSG00000198695	5079.79	2.78634	0.551124	5.05575	4.28702e-07	0.000116889	ND6	Enriched
ENSG00000207445	48.9219	2.7496	0.692378	3.97124	7.1501e-05	0.00309853	SNORD15B	Enriched
ENSG00000198910	18.7769	2.73457	0.744163	3.67469	0.000238135	0.00642963	L1CAM	Enriched
ENSG00000130881	81.9753	2.69739	0.56622	4.76386	1.89921e-06	0.000341297	LRP3	Enriched
ENSG00000174951	45.1139	2.60431	0.570292	4.56663	4.95621e-06	0.000624483	FUT1	Enriched
ENSG00000167604	22.3793	2.58412	0.618134	4.18051	2.90855e-05	0.001705	NFKBID	Enriched
ENSG00000207344	10.7339	2.55694	0.831605	3.0747	0.00210714	NA	SNORA22C	Not Significant
ENSG00000139880	95.9743	2.55097	0.523268	4.87508	1.08763e-06	0.00022079	CDH24	Enriched
ENSG00000198786	39887	2.53479	0.657281	3.85648	0.000115033	0.0041304	ND5	Enriched
ENSG00000259803	30.3611	2.53461	0.713136	3.55417	0.000379175	0.00843106	SLC22A31	Enriched
ENSG00000198840	3862.98	2.51753	1.18871	2.11787	0.034186	0.119371	ND3	Not Significant
ENSG00000154734	26.2738	2.50347	1.57578	1.58871	0.112125	0.252178	ADAMTS1	Not Significant
ENSG00000197483	42.2949	2.49674	0.641073	3.89462	9.83513e-05	0.00380487	ZNF628	Enriched
ENSG00000165802	533.39	2.49124	0.491845	5.0651	4.08187e-07	0.000116889	NSMF	Enriched
ENSG00000075826	13.1291	2.48632	0.822733	3.02202	0.00251091	NA	SEC31B	Not Significant
ENSG00000101194	52.144	2.48206	0.565596	4.3884	1.1419e-05	0.000960891	SLC17A9	Enriched
ENSG00000140961	36.0856	2.4645	0.72341	3.40678	0.000657334	0.011474	OSGIN1	Enriched
ENSG00000110031	34.9784	2.46367	0.586082	4.20362	2.62676e-05	0.00160863	LPXN	Enriched
ENSG00000134817	27.6839	2.44769	0.574307	4.26198	2.02625e-05	0.00137109	APLNR	Enriched
ENSG00000163884	9.57244	2.41904	0.850732	2.84348	0.00446242	NA	KLF15	Not Significant
ENSG00000248923	119.42	2.40781	0.783795	3.07199	0.00212634	0.0225676	MTND5P11	Enriched
ENSG00000140691	41.7056	2.39845	0.581144	4.12712	3.6734e-05	0.0019858	ARMC5	Enriched
ENSG00000197774	77.6646	2.38166	0.596454	3.99303	6.52348e-05	0.00292153	EME2	Enriched
ENSG00000165905	28.4319	2.37848	0.562712	4.22682	2.3702e-05	0.00151059	LARGE2	Enriched
ENSG00000226180	21.8929	2.36461	0.641281	3.68733	0.000226624	0.00620096	LOC100129215	Enriched
ENSG00000182544	96.9834	2.35845	0.624831	3.77453	0.000160307	0.00507886	MFSD5	Enriched
ENSG00000198727	14320.2	2.34564	0.533432	4.39726	1.09625e-05	0.000960891	CYTB	Enriched
ENSG00000149418	502.796	2.33965	0.656778	3.56231	0.000367606	0.00833645	ST14	Enriched
ENSG00000178498	18.7123	2.33896	0.667365	3.50477	0.000457001	0.00926269	DTX3	Enriched
ENSG00000198763	5492.5	2.32584	0.575272	4.04303	5.27659e-05	0.00258223	ND2	Enriched
ENSG00000179163	126.963	2.32493	0.567323	4.09807	4.16618e-05	0.00219566	FUCA1	Enriched
ENSG00000134955	53.2639	2.32053	0.729147	3.18253	0.00145995	0.0181245	SLC37A2	Enriched
ENSG00000164638	10.9535	2.31512	0.765627	3.02383	0.002496	NA	SLC29A4	Not Significant
ENSG00000167680	126.276	2.31034	1.2424	1.85957	0.0629458	0.175531	SEMA6B	Not Significant
ENSG00000169710	5055.65	2.30868	0.51625	4.47203	7.74814e-06	0.000824612	FASN	Enriched
ENSG00000099250	46.2217	2.30131	0.841175	2.73583	0.00622241	0.0435835	NRP1	Enriched
ENSG00000171860	34.3524	2.29777	0.751386	3.05804	0.00222788	0.0233426	C3AR1	Enriched
ENSG00000090674	28.8029	2.29744	0.69966	3.28365	0.00102474	0.0149775	MCOLN1	Enriched
ENSG00000105963	36.7806	2.29399	0.620316	3.6981	0.000217218	0.00608988	ADAP1	Enriched
ENSG00000274917	595.609	2.28953	1.95386	1.1718	NA	NA	RNA5-8SN5	Not Significant
ENSG00000124107	13.5813	2.28017	0.719091	3.1709	0.00151966	NA	SLPI	Not Significant
ENSG00000008300	115.164	2.27106	0.535939	4.23754	2.25986e-05	0.00145721	CELSR3	Enriched
ENSG00000198888	11025.9	2.271	0.513466	4.42288	9.73927e-06	0.000897158	ND1	Enriched
ENSG00000198804	21376.9	2.26859	0.441554	5.13773	2.78072e-07	8.70923e-05	COX1	Enriched
ENSG00000157601	21.0004	2.26237	0.829126	2.72862	0.00635994	0.0441133	MX1	Enriched
ENSG00000184545	24.7489	2.2575	0.656284	3.43982	0.000582109	0.0107425	DUSP8	Enriched
ENSG00000117013	64.7993	2.25674	0.470895	4.79245	1.6476e-06	0.000306118	KCNQ4	Enriched
ENSG00000140807	14.8078	2.25485	0.748338	3.01314	0.00258559	0.0255115	NKD1	Enriched
ENSG00000008710	433.977	2.25409	0.617572	3.64992	0.000262321	0.00687935	PKD1	Enriched
ENSG00000158050	13.9132	2.24975	0.707658	3.17915	0.00147707	NA	DUSP2	Not Significant
ENSG00000261221	169.114	2.24325	0.571155	3.92757	8.58097e-05	0.00350987	ZNF865	Enriched
ENSG00000101986	71.2802	2.24159	0.524746	4.27176	1.93939e-05	0.00132047	ABCD1	Enriched
ENSG00000161996	35.556	2.23216	0.556908	4.00813	6.12012e-05	0.0028133	WDR90	Enriched
ENSG00000132846	10.0243	2.23029	0.848569	2.62829	0.00858147	NA	ZBED3	Not Significant
ENSG00000188060	8.51975	2.22502	1.13582	1.95896	0.0501176	NA	RAB42	Not Significant
ENSG00000129946	12.6362	2.20992	0.985185	2.24315	0.0248872	NA	SHC2	Not Significant
ENSG00000228253	944.434	2.20439	0.648923	3.39699	0.000681314	0.0116879	ATP8	Enriched
ENSG00000025708	44.7488	2.20222	0.700126	3.14547	0.0016582	0.0196405	TYMP	Enriched
ENSG00000162065	169.86	2.19999	0.49459	4.44811	8.66311e-06	0.000857256	TBC1D24	Enriched
ENSG00000130193	50.9955	2.19161	0.565698	3.87417	0.000106988	0.00396219	THEM6	Enriched
ENSG00000173621	116.749	2.1914	0.686277	3.19317	0.00140722	0.0177106	LRFN4	Enriched
ENSG00000170684	39.1791	2.17863	0.588262	3.7035	0.000212649	0.00608631	ZNF296	Enriched
ENSG00000167920	73.505	2.15825	0.660451	3.26785	0.00108368	0.0153991	KRT10-AS1	Enriched
ENSG00000237973	57.9761	2.15716	0.533129	4.04622	5.20515e-05	0.00257022	MTCO1P12	Enriched
ENSG00000183579	77.7928	2.15642	0.536758	4.0175	5.88185e-05	0.00276725	ZNRF3	Enriched
ENSG00000227827	18.3339	2.15348	0.72114	2.98621	0.00282457	0.0270354	PKD1P2	Enriched
ENSG00000174939	10.5276	2.14992	0.840677	2.55737	0.0105468	NA	ASPHD1	Not Significant
ENSG00000170458	52.8688	2.14757	1.92232	1.11718	0.263919	0.429112	CD14	Not Significant
ENSG00000138795	239.015	2.14694	0.469122	4.5765	4.72811e-06	0.000614592	LEF1	Enriched
ENSG00000257017	17.8553	2.14389	0.808101	2.65299	0.00797814	0.0498262	HP	Enriched
ENSG00000176842	15.7659	2.1396	0.791586	2.70293	0.00687308	0.0459687	IRX5	Enriched
ENSG00000176058	127.468	2.13829	0.616354	3.46926	0.000521895	0.0100018	TPRN	Enriched
ENSG00000160999	13.8139	2.13659	0.707713	3.01901	0.00253606	NA	SH2B2	Not Significant
ENSG00000125266	8.91762	2.13208	0.982782	2.16944	0.0300495	NA	EFNB2	Not Significant
ENSG00000168646	18.1149	2.12349	0.666718	3.18499	0.0014476	0.0180121	AXIN2	Enriched
ENSG00000060558	29.7395	2.12242	0.645447	3.2883	0.00100794	0.0148508	GNA15	Enriched
ENSG00000184371	89.5698	2.11242	0.566109	3.73148	0.000190357	0.00571698	CSF1	Enriched
ENSG00000069399	21.3057	2.10649	0.668496	3.15108	0.00162666	0.0194394	BCL3	Enriched
ENSG00000161682	20.0314	2.10051	0.666549	3.15132	0.00162535	0.0194394	FAM171A2	Enriched
ENSG00000131669	68.9374	2.09256	0.64309	3.25391	0.00113828	0.015735	NINJ1	Enriched
ENSG00000173334	131.605	2.09246	0.452805	4.6211	3.81714e-06	0.000536455	TRIB1	Enriched
ENSG00000178718	79.3993	2.0887	0.564641	3.69916	0.00021631	0.00608988	RPP25	Enriched
ENSG00000126709	45.8541	2.0867	1.39867	1.49191	0.135722	0.282311	IFI6	Not Significant
ENSG00000232810	14.8829	2.0852	0.948554	2.19829	0.0279282	0.105858	TNF	Not Significant
ENSG00000123360	58.9494	2.08029	0.605571	3.43525	0.000592	0.0108071	PDE1B	Enriched
ENSG00000198886	33966.1	2.07727	0.588577	3.52931	0.000416641	0.00878312	ND4	Enriched
ENSG00000158292	30.1772	2.07451	0.62108	3.34016	0.00083729	0.0132444	GPR153	Enriched
ENSG00000197405	40.0322	2.07249	1.59539	1.29905	0.193927	0.352659	C5AR1	Not Significant
ENSG00000182687	18.5406	2.06899	0.916424	2.25768	0.0239657	0.0966921	GALR2	Not Significant
ENSG00000130589	128.901	2.06778	0.600241	3.44492	0.000571221	0.0105951	HELZ2	Enriched
ENSG00000176454	56.0906	2.06212	0.545534	3.78	0.000156829	0.00502058	LPCAT4	Enriched
ENSG00000167646	23.6509	2.05566	0.610986	3.3645	0.000766838	0.0124117	DNAAF3	Enriched
ENSG00000123427	34.5612	2.05446	0.587076	3.49947	0.00046618	0.00937664	EEF1AKMT3	Enriched
ENSG00000252010	55.069	2.05406	0.59363	3.46018	0.000539816	0.0102708	SCARNA5	Enriched
ENSG00000111684	47.8625	2.05291	0.539187	3.80742	0.000140424	0.004751	LPCAT3	Enriched
ENSG00000010327	28.5703	2.04844	0.638249	3.20946	0.00132984	0.0172314	STAB1	Enriched
ENSG00000145217	40.8641	2.04812	0.638397	3.20823	0.00133556	0.0172808	SLC26A1	Enriched
ENSG00000101000	27.3531	2.04611	0.586345	3.4896	0.000483752	0.00952045	PROCR	Enriched
ENSG00000188760	12.1749	2.03696	0.763209	2.66894	0.00760911	NA	TMEM198	Not Significant
ENSG00000177374	61.5077	2.03398	0.699938	2.90594	0.00366154	0.0319936	HIC1	Enriched
ENSG00000137825	100.885	2.03309	0.666329	3.05118	0.00227946	0.0236177	ITPKA	Enriched
ENSG00000169047	29.8949	2.03155	0.595318	3.41254	0.000643596	0.0113235	IRS1	Enriched
ENSG00000277443	13.2604	2.02632	0.758814	2.67038	0.00757664	NA	MARCKS	Not Significant
ENSG00000139832	47.7056	2.02091	0.536411	3.76746	0.000164917	0.00517274	RAB20	Enriched
ENSG00000183458	21.0391	2.02017	0.714314	2.82813	0.00468206	0.036624	PKD1P3	Enriched
ENSG00000186577	53.293	2.01495	0.524863	3.83901	0.00012353	0.00431254	SMIM29	Enriched
ENSG00000103326	494.331	2.0114	0.554955	3.62443	0.000289596	0.00723133	CAPN15	Enriched
ENSG00000067191	19.8742	2.01042	0.741201	2.71238	0.00668011	0.0453174	CACNB1	Enriched
ENSG00000147872	580.363	2.00824	0.398759	5.03621	4.74837e-07	0.00012105	PLIN2	Enriched
ENSG00000069011	370.332	2.00762	0.526552	3.81277	0.000137418	0.00469277	PITX1	Enriched
ENSG00000123689	35.8277	1.98992	0.685262	2.90388	0.00368564	0.0320397	G0S2	Enriched
ENSG00000090661	12.3735	1.97846	0.752963	2.62757	0.00859984	NA	CERS4	Not Significant
ENSG00000188566	206.397	1.96712	0.552437	3.5608	0.000369729	0.00833645	NDOR1	Enriched
ENSG00000167693	17.9616	1.96707	0.743274	2.6465	0.00813303	0.0503128	NXN	Not Significant
ENSG00000143590	15.4682	1.96636	0.802442	2.45047	0.0142669	0.0704796	EFNA3	Not Significant
ENSG00000099814	154.757	1.96003	0.580009	3.37931	0.000726669	0.0120099	CEP170B	Enriched
ENSG00000261150	459.956	1.95596	0.503932	3.8814	0.000103857	0.00389889	EPPK1	Enriched
ENSG00000105538	12.1307	1.95527	0.748133	2.61353	0.00896111	NA	RASIP1	Not Significant
ENSG00000149577	89.2191	1.95498	0.541122	3.61283	0.000302873	0.00737799	SIDT2	Enriched
ENSG00000166908	206.289	1.95253	0.406046	4.80865	1.51955e-06	0.000287196	PIP4K2C	Enriched
ENSG00000006025	51.0872	1.94931	0.52759	3.69474	0.000220113	0.00611478	OSBPL7	Enriched
ENSG00000165655	21.4056	1.9483	0.693506	2.80934	0.00496425	0.0380546	ZNF503	Enriched
ENSG00000198837	598.952	1.94566	0.438628	4.43579	9.17351e-06	0.000882105	DENND4B	Enriched
ENSG00000197355	79.8411	1.94393	0.473121	4.10874	3.97816e-05	0.00211692	UAP1L1	Enriched
ENSG00000163704	12.9359	1.93718	0.767836	2.52291	0.0116389	NA	PRRT3	Not Significant
ENSG00000124615	120.23	1.93209	0.466916	4.13798	3.50382e-05	0.00191182	MOCS1	Enriched
ENSG00000174705	51.1476	1.9301	0.598244	3.22628	0.00125412	0.0168474	SH3PXD2B	Enriched
ENSG00000162066	50.2559	1.9298	0.569556	3.38826	0.000703387	0.0119473	AMDHD2	Enriched
ENSG00000213563	39.0434	1.92932	0.532114	3.62577	0.000288105	0.00723133	C8orf82	Enriched
ENSG00000247627	92.0959	1.92819	0.544081	3.54394	0.000394201	0.00852434	MTND4P12	Enriched
ENSG00000198829	15.7626	1.92809	0.698288	2.76116	0.00575963	0.0418958	SUCNR1	Enriched
ENSG00000123179	20.6021	1.92774	0.711502	2.7094	0.00674056	0.0455268	EBPL	Enriched
ENSG00000177042	16.3241	1.92581	0.652491	2.95147	0.00316264	0.0291826	TMEM80	Enriched
ENSG00000212907	3354.26	1.92539	0.647783	2.97228	0.00295602	0.0279343	ND4L	Enriched
ENSG00000197136	570.505	1.92134	0.591899	3.24606	0.00117014	0.0160475	PCNX3	Enriched
ENSG00000139626	41.4506	1.91938	0.769802	2.49334	0.0126547	0.0654036	ITGB7	Not Significant
ENSG00000198794	23.5834	1.9185	0.680049	2.82112	0.00478564	0.0372058	SCAMP5	Enriched
ENSG00000103876	263.136	1.91432	0.513789	3.72588	0.000194633	0.00577899	FAH	Enriched
ENSG00000181523	30.0977	1.91156	0.754868	2.53231	0.0113313	0.0610686	SGSH	Not Significant
ENSG00000267534	14.0914	1.91044	0.727708	2.62528	0.0086578	NA	S1PR2	Not Significant
ENSG00000175854	176.153	1.90465	0.488388	3.89988	9.62413e-05	0.00378135	SWI5	Enriched
ENSG00000160767	178.53	1.89868	0.509945	3.72329	0.00019664	0.00577899	ENTREP3	Enriched
ENSG00000100060	72.1818	1.89765	0.536412	3.53767	0.000403677	0.0086182	MFNG	Enriched
ENSG00000167600	14.861	1.89728	0.731771	2.59272	0.00952191	0.0549075	CYP2S1	Not Significant
ENSG00000251791	31.8668	1.89471	0.657851	2.88015	0.00397488	0.0337511	SCARNA6	Enriched
ENSG00000133106	13.1068	1.89418	0.745008	2.5425	0.0110063	NA	EPSTI1	Not Significant
ENSG00000064547	23.8976	1.89142	0.618675	3.05721	0.0022341	0.0233686	LPAR2	Enriched
ENSG00000172819	20.7999	1.89047	0.611395	3.09206	0.00198774	0.0215739	RARG	Enriched
ENSG00000172269	146.448	1.88886	0.597908	3.15912	0.00158245	0.0192251	DPAGT1	Enriched
ENSG00000242802	113.274	1.88815	0.518999	3.63807	0.000274691	0.00708509	AP5Z1	Enriched
ENSG00000146094	110.391	1.88394	0.532421	3.53844	0.000402498	0.00861754	DOK3	Enriched
ENSG00000162144	122.213	1.88101	0.484951	3.87876	0.000104988	0.00391456	CYB561A3	Enriched
ENSG00000128564	21.1998	1.87946	0.793335	2.36907	0.0178331	0.0801831	VGF	Not Significant
ENSG00000182325	38.5739	1.8789	0.584346	3.21539	0.00130266	0.0171987	FBXL6	Enriched
ENSG00000138111	23.818	1.87737	0.661268	2.83904	0.00452493	0.0362061	MFSD13A	Enriched
ENSG00000273983	73.2996	1.87733	0.477261	3.93355	8.37009e-05	0.00346051	H3C8	Enriched
ENSG00000066322	203.107	1.87652	0.496348	3.78065	0.000156417	0.00502058	ELOVL1	Enriched
ENSG00000245848	247.492	1.87282	0.551459	3.39612	0.000683495	0.0116887	CEBPA	Enriched
ENSG00000123358	28.8422	1.86029	0.689723	2.69716	0.00699346	0.0464058	NR4A1	Enriched
ENSG00000087245	143.604	1.85976	0.579317	3.21026	0.00132614	0.0172037	MMP2	Enriched
ENSG00000140465	11.5562	1.85879	0.749494	2.48006	0.013136	NA	CYP1A1	Not Significant
ENSG00000170412	37.6877	1.85252	0.578693	3.20121	0.00136851	0.0175048	GPRC5C	Enriched
ENSG00000167173	345.55	1.85198	0.521002	3.55465	0.000378479	0.00843106	C15orf39	Enriched
ENSG00000129667	39.9861	1.85151	0.660056	2.80508	0.00503034	0.0383405	RHBDF2	Enriched
ENSG00000182022	74.9393	1.85044	0.602547	3.07103	0.00213323	0.0225937	CHST15	Enriched
ENSG00000197417	19.5426	1.84669	0.672239	2.74707	0.00601308	0.04283	SHPK	Enriched
ENSG00000145214	132.252	1.84405	0.571379	3.22737	0.00124935	0.0168247	DGKQ	Enriched
ENSG00000108679	67.4746	1.84375	0.684643	2.69302	0.00708087	0.0468157	LGALS3BP	Enriched
ENSG00000079432	618.79	1.843	0.505748	3.64411	0.000268322	0.00698657	CIC	Enriched
ENSG00000178821	17.1793	1.84196	0.741605	2.48375	0.0130008	0.0662245	TMEM52	Not Significant
ENSG00000214049	240.481	1.84128	0.471296	3.90685	9.35075e-05	0.00371387	UCA1	Enriched
ENSG00000171522	34.7861	1.83588	0.585729	3.13435	0.00172233	0.020064	PTGER4	Enriched
ENSG00000239039	27.6818	1.83555	0.743361	2.46926	0.0135392	0.0681122	SNORD13	Not Significant
ENSG00000167074	17.0363	1.83342	0.689129	2.66049	0.00780273	0.0492705	TEF	Enriched
ENSG00000147324	228.605	1.83165	0.4313	4.2468	2.16845e-05	0.00144064	MFHAS1	Enriched
ENSG00000205746	32.8539	1.83081	0.674011	2.71629	0.00660178	0.0450054	PKD1P4	Enriched
ENSG00000182175	11.2451	1.82441	0.924507	1.97338	0.0484518	NA	RGMA	Not Significant
ENSG00000010322	382.495	1.82217	0.472377	3.85745	0.000114577	0.0041304	NISCH	Enriched
ENSG00000127580	64.6256	1.8215	0.489164	3.7237	0.000196321	0.00577899	WDR24	Enriched
ENSG00000101464	55.1195	1.81963	0.599584	3.03482	0.00240683	0.0244019	PIGU	Enriched
ENSG00000064932	308.909	1.81954	0.468432	3.88432	0.000102618	0.00387896	SBNO2	Enriched
ENSG00000133250	24.7932	1.8165	0.598392	3.03563	0.00240032	0.0244019	ZNF414	Enriched
ENSG00000112787	504.251	1.81521	0.531701	3.41397	0.000640242	0.0112835	FBRSL1	Enriched
ENSG00000103855	62.8616	1.81051	0.679366	2.66499	0.00769896	0.0490389	CD276	Enriched
ENSG00000164733	1273.1	1.80938	0.600676	3.01225	0.00259323	0.0255391	CTSB	Enriched
ENSG00000168994	14.9681	1.80927	0.699532	2.5864	0.0096985	0.0553435	PXDC1	Not Significant
ENSG00000181588	54.6462	1.80883	0.555889	3.25394	0.00113818	0.015735	MEX3D	Enriched
ENSG00000074416	10.0544	1.80861	0.893029	2.02525	0.0428413	NA	MGLL	Not Significant
ENSG00000088899	21.5545	1.80799	0.624813	2.89365	0.00380786	0.032713	LZTS3	Enriched
ENSG00000160753	213.47	1.80387	0.517029	3.48891	0.000484994	0.00952778	RUSC1	Enriched
ENSG00000126243	13.0358	1.79803	0.750137	2.39694	0.0165328	NA	LRFN3	Not Significant
ENSG00000100365	74.4167	1.79783	0.575327	3.12488	0.00177878	0.0205241	NCF4	Enriched
ENSG00000043591	24.0103	1.79748	0.593954	3.0263	0.00247565	0.0247837	ADRB1	Enriched
ENSG00000198113	239.576	1.79728	0.599129	2.99983	0.00270132	0.0261589	TOR4A	Enriched
ENSG00000221968	103.621	1.79526	0.456487	3.93277	8.39714e-05	0.00346051	FADS3	Enriched
ENSG00000171823	46.4004	1.79459	0.625914	2.86714	0.00414195	0.0346201	FBXL14	Enriched
ENSG00000103257	948.988	1.79399	0.575849	3.11538	0.00183708	0.0207855	SLC7A5	Enriched
ENSG00000129925	286.478	1.79372	0.503803	3.56035	0.000370357	0.00833645	PGAP6	Enriched
ENSG00000171729	17.2824	1.79299	0.857197	2.09169	0.0364665	0.124454	TMEM51	Not Significant
ENSG00000168268	513.957	1.79219	0.490406	3.6545	0.000257687	0.00685352	NT5DC2	Enriched
ENSG00000275832	19.5286	1.79213	0.657821	2.72434	0.00644308	0.0444487	ARHGAP23	Enriched
ENSG00000160959	153.066	1.79205	0.529308	3.38565	0.000710103	0.0119644	LRRC14	Enriched
ENSG00000149483	110.128	1.79023	0.508834	3.5183	0.000434316	0.00898644	TMEM138	Enriched
ENSG00000169221	317.316	1.79002	0.48659	3.67871	0.000234419	0.00637917	TBC1D10B	Enriched
ENSG00000103043	320.352	1.78909	0.433796	4.12427	3.71908e-05	0.00199846	VAC14	Enriched
ENSG00000176182	23.5435	1.78883	0.713293	2.50785	0.0121469	0.0639491	MYPOP	Not Significant
ENSG00000171813	51.1296	1.78753	0.630331	2.83586	0.00457023	0.0363245	PWWP2B	Enriched
ENSG00000127220	31.978	1.78751	0.591989	3.0195	0.00253193	0.0251176	ABHD8	Enriched
ENSG00000177380	167.796	1.78502	0.450946	3.95838	7.54586e-05	0.00322944	PPFIA3	Enriched
ENSG00000215375	11.4037	1.78379	0.861962	2.06945	0.0385037	NA	MYL5	Not Significant
ENSG00000100284	63.5199	1.78335	0.575421	3.09921	0.00194037	0.0212069	TOM1	Enriched
ENSG00000263069	8.23031	1.78319	0.895517	1.99123	0.0464551	NA	RNF213-AS1	Not Significant
ENSG00000237172	17.4664	1.7822	0.66508	2.67968	0.00736924	0.0477433	B3GNT9	Enriched
ENSG00000168890	23.874	1.77662	0.63183	2.81187	0.00492551	0.0378901	TMEM150A	Enriched
ENSG00000180891	10.7101	1.77482	0.767949	2.31111	0.0208265	NA	CUEDC1	Not Significant
ENSG00000162729	24.6714	1.77166	0.604317	2.93167	0.00337148	0.0302859	IGSF8	Enriched
ENSG00000276368	70.7756	1.76858	0.489751	3.61118	0.000304811	0.00740873	H2AC14	Enriched
ENSG00000109089	91.0151	1.76827	0.547617	3.22903	0.0012421	0.016789	CDR2L	Enriched
ENSG00000064601	187.836	1.7676	0.515516	3.4288	0.000606254	0.0109126	CTSA	Enriched
ENSG00000212464	15.9749	1.7639	0.650851	2.71014	0.00672542	0.0454806	SNORA12	Enriched
ENSG00000157693	77.3209	1.76097	0.492039	3.57892	0.000345019	0.00806418	TMEM268	Enriched
ENSG00000090020	76.8512	1.75806	0.666229	2.63883	0.00831934	0.050981	SLC9A1	Not Significant
ENSG00000198715	63.198	1.75668	0.531005	3.30822	0.000938896	0.0141961	GLMP	Enriched
ENSG00000159618	11.8178	1.75569	0.773456	2.26993	0.0232118	NA	ADGRG5	Not Significant
ENSG00000205643	13.9942	1.75136	0.70495	2.48437	0.0129781	NA	CDPF1	Not Significant
ENSG00000185201	121.464	1.7513	0.504901	3.4686	0.000523173	0.0100088	IFITM2	Enriched
ENSG00000135744	85.6381	1.75095	0.540751	3.23799	0.00120377	0.0163922	AGT	Enriched
ENSG00000104812	236.386	1.74847	0.404746	4.31991	1.56091e-05	0.00117196	GYS1	Enriched
ENSG00000105122	17.7212	1.7483	0.702322	2.48931	0.012799	0.0658391	RASAL3	Not Significant
ENSG00000182272	64.0484	1.74806	0.49526	3.52959	0.000416211	0.00878312	B4GALNT4	Enriched
ENSG00000198720	62.6435	1.74741	0.505664	3.45568	0.000548909	0.0103923	ANKRD13B	Enriched
ENSG00000122122	61.9469	1.74732	0.510617	3.42198	0.000621679	0.0110631	SASH3	Enriched
ENSG00000167962	476.911	1.74456	0.471705	3.69843	0.00021694	0.00608988	ZNF598	Enriched
ENSG00000171425	74.5093	1.74268	0.539492	3.23022	0.00123696	0.0167816	ZNF581	Enriched
ENSG00000128011	58.5546	1.74237	0.695735	2.50435	0.0122676	0.0642508	LRFN1	Not Significant
ENSG00000007376	185.435	1.7402	0.626411	2.77805	0.00546857	0.0405045	RPUSD1	Enriched
ENSG00000079313	312.196	1.73905	0.491619	3.53739	0.000404101	0.0086182	REXO1	Enriched
ENSG00000182173	148.283	1.73587	0.50002	3.4716	0.000517375	0.00994994	TSEN54	Enriched
ENSG00000179886	65.9869	1.73449	0.574535	3.01895	0.0025365	0.0251176	TIGD5	Enriched
ENSG00000136235	16.1778	1.73365	0.723428	2.39644	0.0165552	0.0768325	GPNMB	Not Significant
ENSG00000105518	22.6901	1.73336	0.6279	2.76056	0.00577018	0.0419046	TMEM205	Enriched
ENSG00000146232	69.0014	1.73227	0.490547	3.53131	0.000413514	0.00876778	NFKBIE	Enriched
ENSG00000164076	16.4946	1.73126	0.662785	2.6121	0.00899887	0.053189	CAMKV	Not Significant
ENSG00000138061	159.334	1.72361	0.543348	3.17221	0.00151286	0.0186302	CYP1B1	Enriched
ENSG00000157379	23.829	1.72189	0.573517	3.00233	0.00267923	0.0260139	DHRS1	Enriched
ENSG00000171049	8.02491	1.71913	0.901878	1.90616	0.0566292	NA	FPR2	Not Significant
ENSG00000103042	59.1177	1.71701	0.536702	3.19919	0.00137813	0.0176064	SLC38A7	Enriched
ENSG00000185339	11.2383	1.71466	0.789106	2.17291	0.029787	NA	TCN2	Not Significant
ENSG00000179832	76.19	1.71446	0.506508	3.38486	0.000712134	0.0119644	MROH1	Enriched
ENSG00000107882	64.7221	1.71335	0.526247	3.25579	0.00113077	0.0156707	SUFU	Enriched
ENSG00000133619	199.471	1.70886	0.513197	3.32983	0.000868982	0.0134375	KRBA1	Enriched
ENSG00000157933	666.249	1.7088	0.477107	3.58159	0.000341516	0.00801648	SKI	Enriched
ENSG00000166016	39.6278	1.70721	0.501888	3.40158	0.000669982	0.0116078	ABTB2	Enriched
ENSG00000129951	109.392	1.70561	0.460711	3.70212	0.000213804	0.00608758	PLPPR3	Enriched
ENSG00000104866	83.1084	1.70548	0.530821	3.21291	0.00131398	0.0172031	PPP1R37	Enriched
ENSG00000169715	16.2318	1.70468	0.704624	2.41927	0.0155515	0.0739591	MT1E	Not Significant
ENSG00000218891	32.5365	1.70385	0.765951	2.22449	0.0261158	0.102127	ZNF579	Not Significant
ENSG00000173638	259.725	1.7036	0.586291	2.90573	0.003664	0.0319936	SLC19A1	Enriched
ENSG00000185504	236.888	1.70358	0.562812	3.02691	0.00247071	0.0247705	FAAP100	Enriched
ENSG00000109066	226.896	1.7022	0.536709	3.17156	0.00151622	0.0186302	TMEM104	Enriched
ENSG00000241343	12.9117	1.70144	0.732898	2.32152	0.0202585	NA	RPL36A	Not Significant
ENSG00000104899	22.1854	1.70083	0.705583	2.41053	0.0159293	0.0750071	AMH	Not Significant
ENSG00000099625	15.5752	1.70056	0.820116	2.07356	0.0381206	0.128152	CBARP	Not Significant
ENSG00000178409	91.9883	1.69967	0.507393	3.34981	0.000808656	0.0129032	BEND3	Enriched
ENSG00000196878	20.7648	1.69959	0.871246	1.95075	0.0510864	0.154315	LAMB3	Not Significant
ENSG00000172932	76.8938	1.69913	0.482954	3.5182	0.000434484	0.00898644	ANKRD13D	Enriched
ENSG00000198792	135.751	1.69577	0.519192	3.26617	0.00109012	0.0153991	TMEM184B	Enriched
ENSG00000163795	33.193	1.69505	0.612673	2.76664	0.0056637	0.0413628	ZNF513	Enriched
ENSG00000164880	865.987	1.69442	0.451881	3.74971	0.000177041	0.00542839	INTS1	Enriched
ENSG00000160703	23.8346	1.69296	0.592127	2.85912	0.00424823	0.0349618	NLRX1	Enriched
ENSG00000163479	410.481	1.69286	0.474999	3.56393	0.000365341	0.00833645	SSR2	Enriched
ENSG00000198899	7730.94	1.69193	0.62724	2.69742	0.00698785	0.0463966	ATP6	Enriched
ENSG00000198938	15474	1.69163	0.591514	2.85982	0.00423878	0.0349494	COX3	Enriched
ENSG00000085871	46.2309	1.69118	0.511585	3.30576	0.000947205	0.0142627	MGST2	Enriched
ENSG00000130590	25.0329	1.68925	0.721239	2.34215	0.0191731	0.0838439	SAMD10	Not Significant
ENSG00000184675	181.24	1.68454	0.447521	3.76416	0.000167111	0.00518944	AMER1	Enriched
ENSG00000110811	32.2969	1.68422	0.658351	2.55824	0.0105204	0.0583036	P3H3	Not Significant
ENSG00000117408	204.981	1.68231	0.469838	3.58063	0.000342772	0.00802878	IPO13	Enriched
ENSG00000101255	241.554	1.68074	0.461723	3.64014	0.000272485	0.00706142	TRIB3	Enriched
ENSG00000172037	27.0606	1.67865	0.597524	2.80934	0.00496425	0.0380546	LAMB2	Enriched
ENSG00000151176	217.838	1.67853	0.445601	3.76688	0.0001653	0.00517274	PLBD2	Enriched
ENSG00000186815	179.29	1.67623	0.502356	3.33675	0.000847651	0.0132959	TPCN1	Enriched
ENSG00000128973	186.094	1.67394	0.432246	3.87267	0.000107651	0.00397332	CLN6	Enriched
ENSG00000107404	444.077	1.67254	0.510257	3.27783	0.00104608	0.0151482	DVL1	Enriched
ENSG00000125731	29.8763	1.67181	0.566166	2.95286	0.00314845	0.0291006	SH2D3A	Enriched
ENSG00000142089	220.529	1.671	0.470825	3.54909	0.000386561	0.00847619	IFITM3	Enriched
ENSG00000140853	71.2234	1.67001	0.492809	3.38876	0.000702082	0.0119473	NLRC5	Enriched
ENSG00000113749	33.9268	1.6692	0.6551	2.54801	0.0108341	0.0593223	HRH2	Not Significant
ENSG00000099377	44.2615	1.66907	0.653751	2.55307	0.0106779	0.0587605	HSD3B7	Not Significant
ENSG00000167703	98.4902	1.66876	0.573771	2.90842	0.00363265	0.0318925	SLC43A2	Enriched
ENSG00000099904	215.333	1.66809	0.53709	3.10579	0.0018977	0.0210792	ZDHHC8	Enriched
ENSG00000116260	401.351	1.66599	0.554283	3.00566	0.00265007	0.0258452	QSOX1	Enriched
ENSG00000095383	61.1539	1.66594	0.532855	3.12644	0.00176939	0.0204816	TBC1D2	Enriched
ENSG00000122386	22.9573	1.66582	0.724861	2.29812	0.0215548	0.090905	ZNF205	Not Significant
ENSG00000141012	99.3733	1.66485	0.507494	3.28054	0.00103609	0.0150631	GALNS	Enriched
ENSG00000040531	54.1832	1.66454	0.56129	2.96556	0.0030213	0.0283072	CTNS	Enriched
ENSG00000291048	43.5677	1.66217	0.518633	3.20491	0.00135103	0.0173622	ALG1L13P	Enriched
ENSG00000104142	217.864	1.66214	0.485961	3.42031	0.000625493	0.0111129	VPS18	Enriched
ENSG00000142632	48.1467	1.66096	0.583324	2.8474	0.0044078	0.0357214	ARHGEF19	Enriched
ENSG00000142544	16.5281	1.66039	0.743872	2.23209	0.0256093	0.101	CTU1	Not Significant
ENSG00000125503	435.257	1.65807	0.548466	3.02311	0.00250195	0.0249105	PPP1R12C	Enriched
ENSG00000198712	7082.07	1.65802	0.615809	2.69242	0.00709347	0.0468708	COX2	Enriched
ENSG00000142235	35.7576	1.65617	0.557752	2.96937	0.00298413	0.0280308	LMTK3	Enriched
ENSG00000158156	21.1696	1.65612	0.622987	2.65836	0.00785215	0.0495232	XKR8	Enriched
ENSG00000134824	124.936	1.65588	0.437927	3.78117	0.000156093	0.00502058	FADS2	Enriched
ENSG00000163933	49.8978	1.65321	0.473058	3.49472	0.000474551	0.00939919	RFT1	Enriched
ENSG00000189114	58.6849	1.65311	0.686473	2.40812	0.016035	0.0753108	BLOC1S3	Not Significant
ENSG00000181652	11.3872	1.65301	0.758719	2.17868	0.0293551	NA	ATG9B	Not Significant
ENSG00000205309	13.6772	1.65268	0.686542	2.40725	0.0160733	NA	NT5M	Not Significant
ENSG00000168389	160.325	1.64906	0.441767	3.73288	0.000189305	0.0057125	MFSD2A	Enriched
ENSG00000069424	814.91	1.64469	0.473564	3.47299	0.000514691	0.00991571	KCNAB2	Enriched
ENSG00000026036	22.5191	1.64202	0.69053	2.37791	0.0174109	0.0792153	RTEL1-TNFRSF6B	Not Significant
ENSG00000280670	11.9607	1.63807	0.819813	1.9981	0.0457062	NA	CCDC163	Not Significant
ENSG00000235508	15.4485	1.63785	0.765802	2.13874	0.0324564	0.116222	RPS2P7	Not Significant
ENSG00000143595	37.6163	1.63689	0.622495	2.62957	0.00854942	0.0517336	AQP10	Not Significant
ENSG00000275126	100.38	1.6359	0.436897	3.74437	0.000180845	0.00552206	H4C13	Enriched
ENSG00000160949	359.822	1.63536	0.487093	3.35738	0.000786854	0.0126288	TONSL	Enriched
ENSG00000159069	251.089	1.63522	0.526917	3.10337	0.00191331	0.0211216	FBXW5	Enriched
ENSG00000130479	201.381	1.63374	0.529351	3.0863	0.00202661	0.0218229	MAP1S	Enriched
ENSG00000137343	12.3431	1.63034	0.712668	2.28766	0.0221573	NA	ATAT1	Not Significant
ENSG00000107816	211.14	1.62958	0.498143	3.27131	0.00107051	0.0153198	LZTS2	Enriched
ENSG00000116521	300.399	1.62802	0.504586	3.22645	0.00125338	0.0168474	SCAMP3	Enriched
ENSG00000180921	325.467	1.62696	0.498913	3.26101	0.00111015	0.0155619	FAM83H	Enriched
ENSG00000083838	26.0918	1.62687	0.560145	2.90437	0.00367988	0.0320397	ZNF446	Enriched
ENSG00000184887	40.5401	1.62683	0.523369	3.10838	0.00188117	0.020978	BTBD6	Enriched
ENSG00000147144	21.3405	1.62637	0.632078	2.57305	0.0100806	0.0567506	CCDC120	Not Significant
ENSG00000180900	612.436	1.62637	0.530316	3.06679	0.00216369	0.022828	SCRIB	Enriched
ENSG00000109736	149.569	1.62608	0.556636	2.92125	0.00348625	0.0309779	MFSD10	Enriched
ENSG00000106397	263.86	1.6258	0.51001	3.18778	0.00143372	0.01796	PLOD3	Enriched
ENSG00000226210	30.5138	1.6247	0.614296	2.64482	0.00817338	0.0505054	WASH8P	Not Significant
ENSG00000076067	36.1915	1.62433	0.543779	2.98712	0.00281619	0.0269852	RBMS2	Enriched
ENSG00000257704	19.0804	1.62137	0.681208	2.38014	0.0173061	0.0790457	INAFM1	Not Significant
ENSG00000153551	38.0727	1.62113	0.565631	2.86606	0.00415611	0.0346722	CMTM7	Enriched
ENSG00000177051	90.305	1.61907	0.621474	2.60522	0.00918164	0.0535938	FBXO46	Not Significant
ENSG00000130821	962.584	1.61789	0.501789	3.22424	0.00126308	0.0168852	SLC6A8	Enriched
ENSG00000185803	185.001	1.61772	0.609302	2.65505	0.00792977	0.0497574	SLC52A2	Enriched
ENSG00000116685	268.471	1.61619	0.547281	2.95313	0.00314573	0.0291	KIAA2013	Enriched
ENSG00000124216	31.3473	1.61617	0.586604	2.75513	0.00586693	0.0421174	SNAI1	Enriched
ENSG00000268858	45.4929	1.61156	0.555813	2.89946	0.00373803	0.0323031	LOC112268269	Enriched
ENSG00000176531	22.4185	1.60931	0.660471	2.43661	0.0148258	0.072032	PHLDB3	Not Significant
ENSG00000108509	111.395	1.60767	0.491223	3.27279	0.00106492	0.0152796	CAMTA2	Enriched
ENSG00000182095	811.17	1.60711	0.531486	3.02381	0.00249614	0.0248978	TNRC18	Enriched
ENSG00000180425	14.2433	1.60631	0.809705	1.98382	0.0472756	NA	C11orf71	Not Significant
ENSG00000187773	17.094	1.60471	0.66108	2.42741	0.0152072	0.0730611	DIPK1C	Not Significant
ENSG00000167716	181.136	1.60416	0.559553	2.86686	0.00414565	0.0346201	WDR81	Enriched
ENSG00000185800	101.854	1.6037	0.522046	3.07195	0.00212665	0.0225676	DMWD	Enriched
ENSG00000142405	34.7106	1.6021	0.705994	2.26928	0.0232515	0.0950348	NLRP12	Not Significant
ENSG00000289609	26.008	1.60165	0.826983	1.93673	0.0527778	0.157428	LOC124901321	Not Significant
ENSG00000157833	74.1278	1.60075	0.49862	3.21037	0.00132565	0.0172037	GAREM2	Enriched
ENSG00000136856	15.628	1.60071	0.663087	2.41402	0.0157775	0.0746773	SLC2A8	Not Significant
ENSG00000182087	280.499	1.59893	0.590254	2.70889	0.00675083	0.0455681	TMEM259	Enriched
ENSG00000187961	42.7375	1.59736	0.498717	3.20294	0.0013603	0.0174201	KLHL17	Enriched
ENSG00000273542	166.044	1.59733	0.490215	3.25842	0.00112033	0.0156049	H4C12	Enriched
ENSG00000125912	484.293	1.59687	0.579945	2.75348	0.00589649	0.0422743	NCLN	Enriched
ENSG00000124574	129.248	1.5953	0.465648	3.42598	0.000612586	0.0109647	ABCC10	Enriched
ENSG00000164683	15.6499	1.59125	0.772159	2.06078	0.0393238	0.130706	HEY1	Not Significant
ENSG00000104976	74.3195	1.59097	0.516084	3.08277	0.00205083	0.0219905	SNAPC2	Enriched
ENSG00000112033	136.638	1.59095	0.470327	3.38264	0.000717919	0.0120013	PPARD	Enriched
ENSG00000092067	13.7777	1.59073	0.703996	2.25957	0.0238482	NA	CEBPE	Not Significant
ENSG00000075426	108.34	1.59012	0.555405	2.86299	0.00419658	0.0347956	FOSL2	Enriched
ENSG00000197530	93.062	1.58795	0.585623	2.71155	0.00669695	0.0453542	MIB2	Enriched
ENSG00000123989	147.743	1.58625	0.650798	2.43738	0.0147939	0.072022	CHPF	Not Significant
ENSG00000142327	242.483	1.58562	0.537941	2.94757	0.00320286	0.0294545	RNPEPL1	Enriched
ENSG00000099364	313.384	1.58348	0.450964	3.51132	0.000445893	0.00916163	FBXL19	Enriched
ENSG00000151366	33.104	1.58262	0.681383	2.32265	0.0201977	0.0869852	NDUFC2	Not Significant
ENSG00000166166	144.976	1.57962	0.59026	2.67614	0.00744764	0.0479959	TRMT61A	Enriched
ENSG00000261819	10.074	1.57906	0.851339	1.8548	0.0636251	NA	LOC728138	Not Significant
ENSG00000181418	30.5914	1.57836	0.557443	2.83143	0.00463403	0.0364813	DDN	Enriched
ENSG00000119986	23.6821	1.57784	0.594573	2.65373	0.00796069	0.0498089	AVPI1	Enriched
ENSG00000163013	118.812	1.5766	0.473056	3.3328	0.000859755	0.0134242	FBXO41	Enriched
ENSG00000225614	195.346	1.57646	0.581829	2.7095	0.00673852	0.0455268	ZNF469	Enriched
ENSG00000179094	128.749	1.57535	0.488985	3.22167	0.00127446	0.0169959	PER1	Enriched
ENSG00000128965	31.0975	1.57487	0.629357	2.50234	0.0123374	0.06436	CHAC1	Not Significant
ENSG00000287080	88.3435	1.5729	0.45699	3.44188	0.000577695	0.0106971	H3C3	Enriched
ENSG00000104888	39.0229	1.5716	0.568239	2.76574	0.00567934	0.0414218	SLC17A7	Enriched
ENSG00000132361	783.878	1.57094	0.487066	3.22531	0.00125837	0.0168474	CLUH	Enriched
ENSG00000087266	135.662	1.5705	0.51088	3.0741	0.00211136	0.022491	SH3BP2	Enriched
ENSG00000077150	67.1092	1.57035	0.462969	3.39191	0.000694074	0.0118511	NFKB2	Enriched
ENSG00000165886	12.4345	1.56449	0.933098	1.67667	0.0936076	NA	UBTD1	Not Significant
ENSG00000089693	427.424	1.56402	0.453167	3.4513	0.000557899	0.0104721	MLF2	Enriched
ENSG00000169992	43.4545	1.56328	0.526467	2.96939	0.00298396	0.0280308	NLGN2	Enriched
ENSG00000197070	61.9949	1.55855	0.545489	2.85716	0.00427446	0.0351512	ARRDC1	Enriched
ENSG00000156860	353.7	1.55702	0.47518	3.2767	0.00105027	0.0151482	FBRS	Enriched
ENSG00000177706	299.981	1.55666	0.708752	2.19633	0.028068	0.106097	FAM20C	Not Significant
ENSG00000072071	317.311	1.55534	0.495664	3.13789	0.00170169	0.0199508	ADGRL1	Enriched
ENSG00000162004	15.8319	1.55481	0.662884	2.34553	0.0190003	0.0835128	CCDC78	Not Significant
ENSG00000200087	596.522	1.55481	0.57729	2.69329	0.00707516	0.0468062	SNORA73B	Enriched
ENSG00000272333	651.448	1.55455	0.451753	3.44115	0.000579243	0.0107077	KMT2B	Enriched
ENSG00000177732	195.708	1.55403	0.495922	3.13362	0.00172667	0.0200931	SOX12	Enriched
ENSG00000185818	63.7773	1.55315	0.587111	2.64542	0.00815904	0.0504452	NAT8L	Not Significant
ENSG00000167397	29.5055	1.55204	0.59977	2.58773	0.00966103	0.0552368	VKORC1	Not Significant
ENSG00000159199	167.124	1.54887	0.473004	3.27454	0.00105833	0.0152249	ATP5MC1	Enriched
ENSG00000103168	89.8438	1.54838	0.566188	2.73474	0.00624286	0.0436165	TAF1C	Enriched
ENSG00000120708	69.846	1.54679	0.566063	2.73253	0.00628494	0.0438253	TGFBI	Enriched
ENSG00000156603	35.9364	1.54663	0.608551	2.5415	0.0110376	0.0599577	MED19	Not Significant
ENSG00000156345	15.8105	1.54234	0.691047	2.23189	0.025622	0.101	CDK20	Not Significant
ENSG00000130382	510.058	1.54213	0.433038	3.56119	0.000369171	0.00833645	MLLT1	Enriched
ENSG00000136840	90.4349	1.54207	0.519398	2.96896	0.00298811	0.0280443	ST6GALNAC4	Enriched
ENSG00000127838	183.23	1.54192	0.544796	2.83028	0.00465075	0.036536	PNKD	Enriched
ENSG00000104856	22.1426	1.54161	0.645368	2.38873	0.0169067	0.0779029	RELB	Not Significant
ENSG00000166289	18.2125	1.54094	0.643307	2.39534	0.016605	0.0769981	PLEKHF1	Not Significant
ENSG00000108375	9.98472	1.54024	0.794903	1.93764	0.0526666	NA	RNF43	Not Significant
ENSG00000090487	229.701	1.53999	0.5091	3.02493	0.00248687	0.0248547	SPG21	Enriched
ENSG00000099821	362.506	1.53936	0.49309	3.12187	0.00179708	0.0205633	POLRMT	Enriched
ENSG00000108439	137.294	1.53911	0.573333	2.68449	0.00726397	0.0474578	PNPO	Enriched
ENSG00000068724	201.048	1.53683	0.39796	3.86177	0.000112567	0.00409952	TTC7A	Enriched
ENSG00000103249	313.474	1.5358	0.539428	2.84709	0.00441209	0.0357214	CLCN7	Enriched
ENSG00000165716	22.8909	1.53568	0.69252	2.21752	0.0265874	0.103059	DIPK1B	Not Significant
ENSG00000179598	29.7486	1.53497	0.587326	2.6135	0.00896205	0.0530751	PLD6	Not Significant
ENSG00000167615	256.925	1.53321	0.427997	3.58228	0.000340604	0.00801223	LENG8	Enriched
ENSG00000120949	89.0623	1.53297	0.556373	2.7553	0.00586383	0.0421174	TNFRSF8	Enriched
ENSG00000188157	485.934	1.53234	0.571585	2.68086	0.00734338	0.0476866	AGRN	Enriched
ENSG00000167895	49.8077	1.53231	0.526346	2.91122	0.00360025	0.0316725	TMC8	Enriched
ENSG00000215458	91.0747	1.53084	0.59609	2.56813	0.0102249	0.0572742	AATBC	Not Significant
ENSG00000157227	238.197	1.53062	0.673204	2.27363	0.0229882	0.0943896	MMP14	Not Significant
ENSG00000079739	45.4282	1.53045	0.599403	2.55329	0.010671	0.058752	PGM1	Not Significant
ENSG00000143537	236.142	1.52863	0.522672	2.92464	0.00344856	0.0307843	ADAM15	Enriched
ENSG00000266714	42.0414	1.52647	0.586911	2.60086	0.00929915	0.0539922	MYO15B	Not Significant
ENSG00000085644	65.6939	1.52598	0.555439	2.74734	0.00600805	0.042822	ZNF213	Enriched
ENSG00000115275	195.705	1.52587	0.532866	2.86352	0.00418964	0.0347812	MOGS	Enriched
ENSG00000114395	13.1227	1.52502	0.716113	2.12958	0.033206	NA	CYB561D2	Not Significant
ENSG00000158850	184.294	1.52463	0.489238	3.11633	0.00183117	0.0207584	B4GALT3	Enriched
ENSG00000156858	108.079	1.52448	0.473854	3.21719	0.00129452	0.0171591	PRR14	Enriched
ENSG00000203485	190.275	1.52406	0.481764	3.16349	0.0015589	0.0190086	INF2	Enriched
ENSG00000187193	13.2336	1.5231	0.773093	1.97014	0.0488226	NA	MT1X	Not Significant
ENSG00000117385	235.827	1.5229	0.449498	3.38799	0.000704062	0.0119473	P3H1	Enriched
ENSG00000130844	25.9886	1.52286	0.65954	2.30897	0.0209454	0.0891664	ZNF331	Not Significant
ENSG00000165895	20.3324	1.52278	0.687312	2.21556	0.0267218	0.103288	ARHGAP42	Not Significant
ENSG00000262246	25.5096	1.52224	0.6021	2.52823	0.0114641	0.0614519	CORO7	Not Significant
ENSG00000140497	202.672	1.52161	0.576535	2.63924	0.00830929	0.050981	SCAMP2	Not Significant
ENSG00000096433	360.377	1.51906	0.409916	3.70579	0.000210736	0.00607918	ITPR3	Enriched
ENSG00000205903	268.52	1.51833	0.492798	3.08105	0.00206273	0.0220817	ZNF316	Enriched
ENSG00000160226	25.5097	1.51823	0.768816	1.97476	0.0482952	0.148879	CFAP410	Not Significant
ENSG00000189067	43.0449	1.51811	0.535589	2.83447	0.00459019	0.036383	LITAF	Enriched
ENSG00000183484	62.0986	1.5176	0.621998	2.43987	0.0146924	0.0718049	GPR132	Not Significant
ENSG00000178814	109.213	1.51627	0.552547	2.74414	0.00606697	0.043046	OPLAH	Enriched
ENSG00000131067	34.1285	1.51597	0.539573	2.80957	0.00496078	0.0380546	GGT7	Enriched
ENSG00000104894	54.5902	1.51541	0.501794	3.01997	0.00252796	0.025101	CD37	Enriched
ENSG00000103653	353.762	1.51535	0.483796	3.13221	0.00173496	0.0201469	CSK	Enriched
ENSG00000135218	97.7142	1.51483	0.553609	2.73629	0.00621364	0.0435835	CD36	Enriched
ENSG00000141526	276.302	1.51466	0.590839	2.56358	0.0103598	0.0577642	SLC16A3	Not Significant
ENSG00000152402	33.3856	1.51269	0.652082	2.31978	0.0203528	0.0875039	GUCY1A2	Not Significant
ENSG00000126062	89.9691	1.51232	0.597637	2.53049	0.0113903	0.0612361	TMEM115	Not Significant
ENSG00000178381	43.9391	1.51015	0.543599	2.77805	0.00546858	0.0405045	ZFAND2A	Enriched
ENSG00000220205	36.7648	1.50847	0.582802	2.5883	0.00964514	0.0552165	VAMP2	Not Significant
ENSG00000122515	199.532	1.50785	0.50065	3.01179	0.00259716	0.0255391	ZMIZ2	Enriched
ENSG00000125657	46.6289	1.50644	0.588188	2.56116	0.0104324	0.0579449	TNFSF9	Not Significant
ENSG00000197562	88.0754	1.50604	0.56213	2.67917	0.00738053	0.0477881	RAB40C	Enriched
ENSG00000089351	214.572	1.50582	0.432065	3.48517	0.000491822	0.00959829	GRAMD1A	Enriched
ENSG00000131779	63.6828	1.5055	0.49056	3.06894	0.00214821	0.0226866	PEX11B	Enriched
ENSG00000150990	306.178	1.50517	0.504715	2.98223	0.00286159	0.0272772	DHX37	Enriched
ENSG00000283199	11.165	1.5051	0.74434	2.02207	0.0431696	NA	C13orf46	Not Significant
ENSG00000197380	10.2275	1.50434	0.744181	2.02147	0.0432313	NA	DACT3	Not Significant
ENSG00000176749	33.3477	1.5009	0.612748	2.44947	0.0143068	0.0705881	CDK5R1	Not Significant
ENSG00000004399	185.085	1.50048	0.486572	3.08377	0.00204394	0.0219878	PLXND1	Enriched
ENSG00000186395	532.588	1.50046	0.464807	3.22813	0.00124601	0.0168004	KRT10	Enriched
ENSG00000158792	48.4686	1.49894	0.662364	2.26302	0.0236346	0.0957793	SPATA2L	Not Significant
ENSG00000234127	42.3976	1.49732	0.516602	2.8984	0.00375072	0.0323744	TRIM26	Enriched
ENSG00000291129	6.2354	1.49701	1.01118	1.48046	0.138749	NA	PPIEL	Not Significant
ENSG00000169951	34.3685	1.49684	0.596713	2.50848	0.0121253	0.0638722	ZNF764	Not Significant
ENSG00000181830	77.2135	1.49517	0.500189	2.98921	0.00279701	0.0268756	SLC35C1	Enriched
ENSG00000062524	12.6842	1.49421	0.784587	1.90445	0.0568513	NA	LTK	Not Significant
ENSG00000177303	77.5308	1.49298	0.465585	3.20668	0.00134278	0.0172993	CASKIN2	Enriched
ENSG00000177614	15.1594	1.49264	0.665533	2.24278	0.0249109	0.0992633	PGBD5	Not Significant
ENSG00000117984	558.894	1.49094	0.684675	2.17759	0.0294363	0.109282	CTSD	Not Significant
ENSG00000176978	277.98	1.49084	0.586099	2.54366	0.0109698	0.0597074	DPP7	Not Significant
ENSG00000188735	116.321	1.49014	0.472147	3.1561	0.00159895	0.0193036	TMEM120B	Enriched
ENSG00000160469	16.4648	1.48926	0.752095	1.98015	0.0476863	0.147708	BRSK1	Not Significant
ENSG00000128815	169.572	1.48781	0.436344	3.40972	0.000650297	0.0113693	WDFY4	Enriched
ENSG00000169136	104.267	1.48622	0.564256	2.63395	0.00843981	0.0513799	ATF5	Not Significant
ENSG00000129968	112.635	1.48565	0.51135	2.90535	0.00366848	0.0319936	ABHD17A	Enriched
ENSG00000116771	12.6201	1.48539	0.720536	2.06151	0.0392542	NA	AGMAT	Not Significant
ENSG00000119655	76.4179	1.48464	0.559853	2.65184	0.00800533	0.0498322	NPC2	Enriched
ENSG00000180592	7.9438	1.48337	0.888956	1.66867	0.0951837	NA	SKIDA1	Not Significant
ENSG00000129474	18.5222	1.48208	0.669118	2.21497	0.0267623	0.103372	AJUBA	Not Significant
ENSG00000105514	74.7888	1.48171	0.509996	2.90533	0.00366867	0.0319936	RAB3D	Enriched
ENSG00000168961	56.2971	1.48107	0.50839	2.91326	0.00357679	0.031493	LGALS9	Enriched
ENSG00000184916	125.829	1.48045	0.523498	2.82799	0.00468408	0.036624	JAG2	Enriched
ENSG00000099992	10.7552	1.48019	0.741038	1.99746	0.0457752	NA	TBC1D10A	Not Significant
ENSG00000092621	244.931	1.47977	0.415535	3.56111	0.000369284	0.00833645	PHGDH	Enriched
ENSG00000184497	14.0039	1.47899	0.764345	1.93497	0.0529937	NA	TMEM255B	Not Significant
ENSG00000122490	80.5781	1.47851	0.498774	2.96429	0.00303386	0.0283523	SLC66A2	Enriched
ENSG00000165548	14.3517	1.47847	0.835428	1.76971	0.0767747	0.199149	TMEM63C	Not Significant
ENSG00000102977	91.4004	1.47711	0.49758	2.96859	0.0029917	0.0280539	ACD	Enriched
ENSG00000106683	194.405	1.47704	0.487997	3.02674	0.00247208	0.0247705	LIMK1	Enriched
ENSG00000164867	77.228	1.47542	0.583127	2.5302	0.0113999	0.0612497	NOS3	Not Significant
ENSG00000114853	42.202	1.47451	0.742191	1.98669	0.0469564	0.146357	ZBTB47	Not Significant
ENSG00000172893	357.386	1.47412	0.461434	3.19465	0.00140001	0.0176604	DHCR7	Enriched
ENSG00000051009	77.7434	1.47058	0.520753	2.82395	0.00474357	0.0369374	FHIP1B	Enriched
ENSG00000149925	124.901	1.4695	0.543496	2.70379	0.00685538	0.0459064	ALDOA	Enriched
ENSG00000170485	12.8187	1.46849	0.743354	1.9755	0.0482118	NA	NPAS2	Not Significant
ENSG00000141258	102.211	1.46831	0.488319	3.00686	0.00263965	0.0258166	SGSM2	Enriched
ENSG00000213199	13.3188	1.46688	0.903913	1.62282	0.104629	NA	ASIC3	Not Significant
ENSG00000213445	274.812	1.46647	0.490399	2.99036	0.00278652	0.0268181	SIPA1	Enriched
ENSG00000067182	129.889	1.46633	0.46593	3.1471	0.00164901	0.0195632	TNFRSF1A	Enriched
ENSG00000196498	1469.49	1.46582	0.46473	3.15413	0.0016098	0.0193706	NCOR2	Enriched
ENSG00000010319	10.7911	1.46488	0.79938	1.83252	0.0668736	NA	SEMA3G	Not Significant
ENSG00000278970	14.2523	1.46432	0.70811	2.06793	0.0386464	0.129381	ZFP62	Not Significant
ENSG00000108828	814.178	1.46205	0.455202	3.21187	0.00131872	0.0172037	VAT1	Enriched
ENSG00000172613	54.1998	1.46151	0.550074	2.65693	0.0078855	0.0496501	RAD9A	Enriched
ENSG00000146828	88.3342	1.46131	0.639382	2.2855	0.0222833	0.0925785	SLC12A9	Not Significant
ENSG00000235173	252.829	1.46051	0.46926	3.11236	0.00185596	0.0208297	HGH1	Enriched
ENSG00000257702	22.8244	1.46034	0.670856	2.17683	0.0294933	0.109373	LBX2-AS1	Not Significant
ENSG00000187741	252.59	1.45979	0.415028	3.51733	0.000435911	0.00899899	FANCA	Enriched
ENSG00000142409	145.775	1.45899	0.550557	2.65003	0.00804845	0.0499587	ZNF787	Enriched
ENSG00000105738	126.924	1.45872	0.454014	3.21295	0.00131379	0.0172031	SIPA1L3	Enriched
ENSG00000103335	1128.38	1.45648	0.488913	2.97903	0.00289165	0.0274681	PIEZO1	Enriched
ENSG00000126391	242.477	1.45534	0.548461	2.65351	0.00796606	0.049814	FRMD8	Enriched
ENSG00000131187	15.7261	1.45475	0.71842	2.02492	0.0428752	0.138398	F12	Not Significant
ENSG00000143373	173.833	1.45388	0.434263	3.34793	0.000814181	0.0129725	ZNF687	Enriched
ENSG00000247774	21.8379	1.45323	0.591404	2.45725	0.0140006	0.0696311	PCED1B-AS1	Not Significant
ENSG00000142185	178.321	1.45237	0.622361	2.33365	0.0196143	0.0850859	TRPM2	Not Significant
ENSG00000087589	220.747	1.4521	0.427214	3.39899	0.000676347	0.0116491	CASS4	Enriched
ENSG00000160957	274.645	1.45112	0.565165	2.56761	0.0102403	0.0573018	RECQL4	Not Significant
ENSG00000081059	87.9152	1.45018	0.422643	3.43123	0.000600861	0.010869	TCF7	Enriched
ENSG00000148840	456.802	1.44992	0.430483	3.36813	0.00075681	0.0123455	PPRC1	Enriched
ENSG00000105732	139.199	1.44974	0.498023	2.91098	0.00360296	0.0316725	ZNF574	Enriched
ENSG00000178719	280.426	1.44537	0.536934	2.69189	0.00710482	0.0469175	GRINA	Enriched
ENSG00000111676	593.863	1.44533	0.488346	2.95964	0.00308002	0.0286614	ATN1	Enriched
ENSG00000177606	150.96	1.44521	0.521534	2.77106	0.00558735	0.0409963	JUN	Enriched
ENSG00000170604	115.387	1.44474	0.579054	2.495	0.0125957	0.0651291	IRF2BP1	Not Significant
ENSG00000266066	34.419	1.44412	0.632723	2.28238	0.0224667	0.0929767	POLRMTP1	Not Significant
ENSG00000273703	79.8574	1.44367	0.469523	3.07477	0.00210664	0.0224859	H2BC14	Enriched
ENSG00000178927	167.445	1.44355	0.479749	3.00898	0.00262127	0.0257015	CYBC1	Enriched
ENSG00000196456	63.2646	1.44197	0.505059	2.85504	0.00430308	0.0353064	ZNF775	Enriched
ENSG00000233762	44.8293	1.44101	0.548847	2.62552	0.00865171	0.0521385	RPS15P4	Not Significant
ENSG00000157637	388.709	1.44079	0.565926	2.54589	0.0109	0.0594159	SLC38A10	Not Significant
ENSG00000077454	50.2981	1.44072	0.550656	2.61638	0.00888687	0.0528041	LRCH4	Not Significant
ENSG00000213923	102.728	1.44033	0.502754	2.86488	0.00417171	0.0347494	CSNK1E	Enriched
ENSG00000181481	16.0688	1.43766	0.696995	2.06266	0.0391451	0.130309	RNF135	Not Significant
ENSG00000203499	11.2464	1.43682	0.73553	1.95344	0.050767	NA	IQANK1	Not Significant
ENSG00000106404	42.3569	1.43664	0.628605	2.28543	0.0222874	0.0925785	CLDN15	Not Significant
ENSG00000135919	16.8631	1.43619	0.64763	2.21761	0.0265813	0.103059	SERPINE2	Not Significant
ENSG00000116786	487.045	1.43567	0.431333	3.32845	0.000873316	0.0134645	PLEKHM2	Enriched
ENSG00000113108	23.1326	1.43493	0.622455	2.30528	0.0211508	0.0896009	APBB3	Not Significant
ENSG00000140406	78.6691	1.43476	0.531461	2.69965	0.00694119	0.0462407	TLNRD1	Enriched
ENSG00000142733	61.2598	1.43464	0.521605	2.75044	0.00595144	0.0425403	MAP3K6	Enriched
ENSG00000126461	369.43	1.43303	0.538383	2.66173	0.00777404	0.0491743	SCAF1	Enriched
ENSG00000205250	476.516	1.4328	0.450423	3.181	0.00146765	0.018179	E2F4	Enriched
ENSG00000004975	129.947	1.43279	0.481078	2.97829	0.00289858	0.0275102	DVL2	Enriched
ENSG00000126603	66.0876	1.43136	0.609343	2.34902	0.0188231	0.0831008	GLIS2	Not Significant
ENSG00000184988	25.4463	1.42984	0.630263	2.26863	0.0232906	0.0950527	TMEM106A	Not Significant
ENSG00000130940	35.8272	1.42966	0.71476	2.0002	0.0454789	0.143408	CASZ1	Not Significant
ENSG00000075275	118.696	1.42795	0.607688	2.34982	0.0187827	0.083056	CELSR1	Not Significant
ENSG00000130829	38.0659	1.42757	0.625456	2.28244	0.0224633	0.0929767	DUSP9	Not Significant
ENSG00000167548	2982.97	1.42736	0.436506	3.26996	0.00107562	0.0153728	KMT2D	Enriched
ENSG00000185085	117.974	1.4261	0.500736	2.848	0.00439955	0.0356979	INTS5	Enriched
ENSG00000100299	20.447	1.42605	0.681961	2.0911	0.0365194	0.124551	ARSA	Not Significant
ENSG00000251705	31.102	1.42577	0.80881	1.7628	0.0779349	0.201159	RNA5-8SP6	Not Significant
ENSG00000238227	121.56	1.42506	0.527738	2.70032	0.00692723	0.0461899	TMEM250	Enriched
ENSG00000114544	43.1624	1.42491	0.495092	2.87807	0.00400115	0.033817	SLC41A3	Enriched
ENSG00000163191	593.308	1.42386	0.467379	3.04648	0.00231539	0.0238546	S100A11	Enriched
ENSG00000066336	190.054	1.42359	0.534583	2.66299	0.00774487	0.0491019	SPI1	Enriched
ENSG00000170638	134.488	1.42157	0.581709	2.44378	0.0145343	0.0713183	TRABD	Not Significant
ENSG00000159423	61.4398	1.42149	0.504355	2.81844	0.00482577	0.0373588	ALDH4A1	Enriched
ENSG00000137331	31.7435	1.42134	0.585858	2.42609	0.0152625	0.0731559	IER3	Not Significant
ENSG00000134769	10.9763	1.42045	0.744608	1.90765	0.0564363	NA	DTNA	Not Significant
ENSG00000140379	11.1143	1.42042	0.925901	1.53409	0.125006	NA	BCL2A1	Not Significant
ENSG00000143418	516.786	1.41987	0.41119	3.45309	0.000554212	0.0104571	CERS2	Enriched
ENSG00000101384	12.0059	1.41959	0.779314	1.82159	0.0685167	NA	JAG1	Not Significant
ENSG00000167851	42.9629	1.41958	0.569532	2.49253	0.0126836	0.0655129	CD300A	Not Significant
ENSG00000214063	41.6884	1.41954	0.625776	2.26845	0.0233016	0.0950621	TSPAN4	Not Significant
ENSG00000175376	176.18	1.41898	0.505742	2.80574	0.00502011	0.0382954	EIF1AD	Enriched
ENSG00000160685	298.171	1.41891	0.483678	2.93359	0.00335069	0.0302049	ZBTB7B	Enriched
ENSG00000174945	8.24067	1.41881	0.997986	1.42168	0.15512	NA	AMZ1	Not Significant
ENSG00000106803	151.418	1.41829	0.505926	2.80336	0.00505725	0.0384246	SEC61B	Enriched
ENSG00000176383	9.47499	1.41779	0.809072	1.75237	0.0797108	NA	B3GNT4	Not Significant
ENSG00000157873	10.6255	1.41733	0.90104	1.573	0.11572	NA	TNFRSF14	Not Significant
ENSG00000178921	330.188	1.41712	0.452671	3.13058	0.0017446	0.0202374	PFAS	Enriched
ENSG00000188130	108.206	1.4169	0.504946	2.80604	0.00501545	0.0382865	MAPK12	Enriched
ENSG00000204310	236.654	1.4161	0.554767	2.55261	0.010692	0.058779	AGPAT1	Not Significant
ENSG00000171443	22.4109	1.41571	0.718368	1.97073	0.0487549	0.149874	ZNF524	Not Significant
ENSG00000104611	13.8767	1.41551	0.804872	1.75867	0.0786328	NA	SH2D4A	Not Significant
ENSG00000126368	23.1061	1.41544	0.584509	2.4216	0.0154525	0.073713	NR1D1	Not Significant
ENSG00000121073	132.335	1.41494	0.474363	2.98281	0.00285613	0.0272488	SLC35B1	Enriched
ENSG00000136720	69.1261	1.41462	0.487121	2.90404	0.00368386	0.0320397	HS6ST1	Enriched
ENSG00000146576	66.1207	1.41427	0.588556	2.40295	0.0162635	0.075961	INTS15	Not Significant
ENSG00000175040	325.316	1.41348	0.465958	3.0335	0.00241734	0.0244681	CHST2	Enriched
ENSG00000148288	69.6412	1.41275	0.539384	2.61919	0.00881386	0.0526239	GBGT1	Not Significant
ENSG00000115266	52.5302	1.41265	0.594644	2.37562	0.0175195	0.0793951	APC2	Not Significant
ENSG00000177548	43.6903	1.41223	0.674183	2.09473	0.0361948	0.123722	RABEP2	Not Significant
ENSG00000103174	44.9607	1.41216	0.609257	2.31785	0.0204575	0.08784	NAGPA	Not Significant
ENSG00000189120	190.563	1.41108	0.522278	2.70178	0.00689687	0.0460435	SP6	Enriched
ENSG00000120885	17.8439	1.41103	0.676298	2.08641	0.0369419	0.125446	CLU	Not Significant
ENSG00000182484	11.0505	1.4095	0.753139	1.8715	0.0612764	NA	WASH6P	Not Significant
ENSG00000104936	46.1106	1.40889	0.643493	2.18944	0.0285648	0.107221	DMPK	Not Significant
ENSG00000198455	17.5328	1.40832	0.695014	2.02632	0.0427322	0.13818	ZXDB	Not Significant
ENSG00000055483	453.584	1.40749	0.471361	2.98602	0.00282637	0.0270354	USP36	Enriched
ENSG00000124191	13.548	1.40743	0.699669	2.01157	0.0442656	NA	TOX2	Not Significant
ENSG00000174915	118.799	1.40719	0.548535	2.56536	0.0103068	0.0575563	PTDSS2	Not Significant
ENSG00000185813	264.171	1.40587	0.430049	3.26909	0.00107894	0.0153872	PCYT2	Enriched
ENSG00000163870	75.3881	1.40459	0.569553	2.46614	0.0136579	0.0685209	TPRA1	Not Significant
ENSG00000177030	118.862	1.40397	0.429055	3.27224	0.001067	0.0152895	DEAF1	Enriched
ENSG00000208772	14.3509	1.40288	0.896531	1.56479	0.117633	0.258686	SNORD94	Not Significant
ENSG00000105063	1222.3	1.40286	0.447001	3.13839	0.00169881	0.0199383	PPP6R1	Enriched
ENSG00000134202	24.71	1.40255	0.59067	2.37451	0.0175721	0.0795314	GSTM3	Not Significant
ENSG00000182858	29.1203	1.40239	0.66492	2.10912	0.0349344	0.121225	ALG12	Not Significant
ENSG00000143878	19.0713	1.40156	0.660559	2.12177	0.033857	0.118879	RHOB	Not Significant
ENSG00000112715	414.697	1.40146	0.473737	2.9583	0.00309338	0.0287613	VEGFA	Enriched
ENSG00000174282	86.7584	1.4013	0.493809	2.83774	0.00454348	0.0362936	ZBTB4	Enriched
ENSG00000135924	47.8132	1.40076	0.618397	2.26515	0.0235033	0.0954587	DNAJB2	Not Significant
ENSG00000111679	253.626	1.39946	0.48766	2.86975	0.00410794	0.0344539	PTPN6	Enriched
ENSG00000148384	60.0281	1.39938	0.547843	2.55435	0.0106386	0.0586917	INPP5E	Not Significant
ENSG00000108557	277.041	1.39789	0.473215	2.95403	0.00313657	0.0290577	RAI1	Enriched
ENSG00000103495	197.619	1.39768	0.463258	3.01708	0.00255226	0.025228	MAZ	Enriched
ENSG00000179869	17.9795	1.39624	0.612547	2.2794	0.0226433	0.0935251	ABCA13	Not Significant
ENSG00000203993	68.7693	1.39513	0.491336	2.83947	0.00451892	0.0362061	ARRDC1-AS1	Enriched
ENSG00000113739	66.1413	1.3951	0.574272	2.42933	0.0151267	0.0728872	STC2	Not Significant
ENSG00000138028	8.79306	1.39494	0.826141	1.6885	0.0913158	NA	CGREF1	Not Significant
ENSG00000119977	101.376	1.39468	0.449826	3.10048	0.00193207	0.0212005	TCTN3	Enriched
ENSG00000145506	10.9072	1.39428	0.798917	1.74521	0.0809485	NA	NKD2	Not Significant
ENSG00000099381	373.5	1.39424	0.43374	3.21447	0.00130687	0.0171987	SETD1A	Enriched
ENSG00000248527	1009.77	1.39422	0.656975	2.12219	0.0338218	0.118846	MTATP6P1	Not Significant
ENSG00000182199	458.072	1.39415	0.41855	3.33089	0.000865677	0.0134268	SHMT2	Enriched
ENSG00000078804	40.8983	1.39409	0.610287	2.28431	0.022353	0.0927456	TP53INP2	Not Significant
ENSG00000169962	10.0921	1.39392	0.84771	1.64434	0.100106	NA	TAS1R3	Not Significant
ENSG00000127561	82.3621	1.3934	0.541279	2.57427	0.0100451	0.0566764	SYNGR3	Not Significant
ENSG00000261236	543.489	1.39234	0.546933	2.54571	0.0109054	0.0594163	BOP1	Not Significant
ENSG00000144843	12.2077	1.39148	0.746555	1.86387	0.0623395	NA	ADPRH	Not Significant
ENSG00000110628	23.8452	1.3908	0.638602	2.17789	0.0294146	0.109265	SLC22A18	Not Significant
ENSG00000066379	54.6926	1.38983	0.536201	2.59199	0.00954223	0.054938	POLR1H	Not Significant
ENSG00000099949	108.059	1.38924	0.47254	2.93994	0.0032828	0.02992	LZTR1	Enriched
ENSG00000173327	283.595	1.38688	0.492357	2.81681	0.00485036	0.0375227	MAP3K11	Enriched
ENSG00000125841	73.9239	1.38634	0.48869	2.83685	0.00455608	0.0362963	NRSN2	Enriched
ENSG00000065000	971.201	1.38571	0.401622	3.45028	0.000560011	0.0104839	AP3D1	Enriched
ENSG00000174516	25.1417	1.3851	0.592403	2.33811	0.0193818	0.0845791	PELI3	Not Significant
ENSG00000183751	309.377	1.38489	0.529657	2.61469	0.00893089	0.0529477	TBL3	Not Significant
ENSG00000073169	46.3599	1.38466	0.560208	2.47169	0.0134475	0.0678779	SELENOO	Not Significant
ENSG00000174365	24.0577	1.38423	0.651939	2.12325	0.0337333	0.118749	SNHG11	Not Significant
ENSG00000232442	7.50959	1.38412	0.91971	1.50496	0.132335	NA	MHENCR	Not Significant
ENSG00000099860	16.8113	1.38408	0.826	1.67564	0.0938087	0.226255	GADD45B	Not Significant
ENSG00000127399	105.094	1.38407	0.552915	2.50323	0.0123065	0.064301	LRRC61	Not Significant
ENSG00000158480	107.386	1.38397	0.430154	3.21739	0.00129365	0.0171591	SPATA2	Enriched
ENSG00000141441	17.9715	1.38243	0.686717	2.01309	0.0441048	0.140914	GAREM1	Not Significant
ENSG00000127415	13.7297	1.38211	0.785188	1.76023	0.0783693	NA	IDUA	Not Significant
ENSG00000177225	258.485	1.38006	0.486756	2.83523	0.00457934	0.0363496	GATD1	Enriched
ENSG00000128165	21.1237	1.37917	0.72687	1.89741	0.0577741	0.166008	ADM2	Not Significant
ENSG00000073536	161.383	1.37847	0.422813	3.26023	0.0011132	0.0155676	NLE1	Enriched
ENSG00000076201	384.63	1.37846	0.430087	3.20508	0.00135023	0.0173622	PTPN23	Enriched
ENSG00000179943	53.1845	1.37797	0.537847	2.562	0.010407	0.0578737	FIZ1	Not Significant
ENSG00000142102	74.7428	1.37769	0.494718	2.7848	0.00535611	0.0399684	PGGHG	Enriched
ENSG00000154237	44.748	1.37764	0.551588	2.49758	0.0125043	0.0649325	LRRK1	Not Significant
ENSG00000171840	17.09	1.37761	0.647234	2.12846	0.0332987	0.117825	NINJ2	Not Significant
ENSG00000177410	118.657	1.37745	0.461511	2.98466	0.00283898	0.0271088	ZFAS1	Enriched
ENSG00000225697	54.4244	1.37744	0.497123	2.77082	0.0055915	0.0409993	SLC26A6	Enriched
ENSG00000123643	139.495	1.377	0.467822	2.94343	0.00324593	0.0297011	SLC36A1	Enriched
ENSG00000160256	99.1064	1.37669	0.607109	2.26762	0.0233526	0.0951285	SLX9	Not Significant
ENSG00000086506	17.0091	1.37633	0.737776	1.86551	0.0621099	0.173997	HBQ1	Not Significant
ENSG00000089639	123.401	1.3761	0.52587	2.61681	0.00887555	0.052791	GMIP	Not Significant
ENSG00000030110	76.5216	1.37608	0.468696	2.93598	0.00332493	0.0301471	BAK1	Enriched
ENSG00000169692	140.489	1.37586	0.575204	2.39194	0.0167594	0.0774041	AGPAT2	Not Significant
ENSG00000180720	14.6705	1.37302	0.696281	1.97193	0.0486178	0.149747	CHRM4	Not Significant
ENSG00000189319	131.835	1.37258	0.451162	3.04232	0.00234759	0.0240373	FAM53B	Enriched
ENSG00000199753	16.1533	1.3724	0.856093	1.6031	0.108913	0.247698	SNORD104	Not Significant
ENSG00000108784	21.4264	1.37151	0.701512	1.95508	0.0505739	0.153358	NAGLU	Not Significant
ENSG00000011132	45.134	1.371	0.599834	2.28563	0.022276	0.0925785	APBA3	Not Significant
ENSG00000100325	297.778	1.37092	0.440624	3.1113	0.00186264	0.0208515	ASCC2	Enriched
ENSG00000070413	550.098	1.3708	0.55189	2.48383	0.0129979	0.0662245	DGCR2	Not Significant
ENSG00000186174	246.489	1.36993	0.498567	2.74773	0.00600098	0.0427995	BCL9L	Enriched
ENSG00000161328	22.812	1.36926	0.83181	1.64612	0.0997392	0.235127	LRRC56	Not Significant
ENSG00000124299	68.3671	1.36883	0.500046	2.73741	0.00619243	0.0435835	PEPD	Enriched
ENSG00000269335	23.4039	1.3664	0.596788	2.28959	0.0220451	0.0921304	IKBKG	Not Significant
ENSG00000043355	44.6427	1.36552	0.538668	2.535	0.0112448	0.0606982	ZIC2	Not Significant
ENSG00000110108	181.396	1.36503	0.590511	2.3116	0.0207996	0.0887144	TMEM109	Not Significant
ENSG00000126934	426.102	1.36488	0.530386	2.57338	0.0100712	0.056732	MAP2K2	Not Significant
ENSG00000135124	23.5546	1.36452	0.587457	2.32276	0.0201918	0.0869852	P2RX4	Not Significant
ENSG00000251493	25.5846	1.36185	0.584558	2.3297	0.0198218	0.0856821	FOXD1	Not Significant
ENSG00000125538	8.04752	1.36142	0.893629	1.52347	0.127641	NA	IL1B	Not Significant
ENSG00000070404	19.7209	1.36023	0.614233	2.21452	0.0267928	0.103418	FSTL3	Not Significant
ENSG00000063438	9.89787	1.36021	0.817461	1.66395	0.0961223	NA	AHRR	Not Significant
ENSG00000142002	285.073	1.35956	0.494488	2.74942	0.00597006	0.0426344	DPP9	Enriched
ENSG00000184363	254.591	1.35792	0.467878	2.90229	0.00370445	0.0321013	PKP3	Enriched
ENSG00000108262	263.076	1.35716	0.459456	2.95384	0.00313851	0.0290577	GIT1	Enriched
ENSG00000107021	169.467	1.35681	0.522932	2.59461	0.00946979	0.0546966	TBC1D13	Not Significant
ENSG00000201998	76.2328	1.35677	0.728776	1.86171	0.0626441	0.174957	SNORA23	Not Significant
ENSG00000188677	128.023	1.35665	0.413114	3.28397	0.00102356	0.0149775	PARVB	Enriched
ENSG00000101199	282.04	1.35592	0.47364	2.86278	0.00419947	0.0347956	ARFGAP1	Enriched
ENSG00000168477	57.37	1.35544	0.608055	2.22914	0.0258043	0.101491	TNXB	Not Significant
ENSG00000197989	117.624	1.35544	0.561725	2.41299	0.0158222	0.0747923	SNHG12	Not Significant
ENSG00000013523	111.468	1.35542	0.434104	3.12235	0.00179416	0.0205633	ANGEL1	Enriched
ENSG00000110719	113.155	1.35463	0.572266	2.36713	0.0179268	0.0805052	TCIRG1	Not Significant
ENSG00000175063	41.1473	1.35445	0.530811	2.55166	0.0107211	0.0588614	UBE2C	Not Significant
ENSG00000063245	675.888	1.35347	0.497924	2.71823	0.00656317	0.0449378	EPN1	Enriched
ENSG00000110697	205.574	1.35328	0.507979	2.66405	0.0077206	0.0490627	PITPNM1	Enriched
ENSG00000121653	20.793	1.35326	0.608737	2.22306	0.0262118	0.102254	MAPK8IP1	Not Significant
ENSG00000177542	143.897	1.35286	0.57956	2.33428	0.0195811	0.0850426	SLC25A22	Not Significant
ENSG00000224051	129.522	1.3528	0.636282	2.12611	0.0334942	0.118173	CPTP	Not Significant
ENSG00000140464	194.862	1.3521	0.451912	2.99196	0.00277196	0.0267308	PML	Enriched
ENSG00000100427	58.9245	1.35132	0.522394	2.58678	0.00968767	0.0553106	MLC1	Not Significant
ENSG00000163462	14.4159	1.35126	0.73747	1.83229	0.0669077	0.182918	TRIM46	Not Significant
ENSG00000165233	20.985	1.3506	0.603748	2.23703	0.0252845	0.100097	CARD19	Not Significant
ENSG00000241852	12.5913	1.35042	0.715896	1.88633	0.0592501	NA	C8orf58	Not Significant
ENSG00000173653	36.2223	1.34976	0.614261	2.19737	0.0279937	0.105962	RCE1	Not Significant
ENSG00000129932	87.3258	1.34872	0.613644	2.19789	0.0279571	0.105897	DOHH	Not Significant
ENSG00000159720	205.385	1.34867	0.449115	3.00294	0.00267383	0.0259845	ATP6V0D1	Enriched
ENSG00000167685	70.7055	1.3482	0.612146	2.20241	0.0276363	0.105375	ZNF444	Not Significant
ENSG00000165684	204.043	1.3471	0.480794	2.80182	0.00508156	0.0385762	SNAPC4	Enriched
ENSG00000149328	82.4275	1.34661	0.512006	2.63007	0.00853664	0.0517009	GLB1L2	Not Significant
ENSG00000103502	98.6855	1.34652	0.509402	2.64334	0.00820923	0.0506698	CDIPT	Not Significant
ENSG00000102996	50.9771	1.34619	0.484456	2.77876	0.00545669	0.0404711	MMP15	Enriched
ENSG00000167595	82.9802	1.34602	0.513558	2.62097	0.00876795	0.0524927	PROSER3	Not Significant
ENSG00000198841	25.217	1.34571	0.565882	2.37808	0.0174029	0.0792153	KTI12	Not Significant
ENSG00000158747	12.8395	1.34557	0.782076	1.72051	0.0853394	NA	NBL1	Not Significant
ENSG00000142459	40.4133	1.34552	0.650962	2.06697	0.0387371	0.129581	EVI5L	Not Significant
ENSG00000160993	42.3967	1.34546	0.639068	2.10535	0.035261	0.121917	ALKBH4	Not Significant
ENSG00000130702	189.519	1.34404	0.52692	2.55074	0.0107493	0.0589172	LAMA5	Not Significant
ENSG00000105576	419.316	1.34388	0.477622	2.81369	0.00489761	0.0377815	TNPO2	Enriched
ENSG00000140104	19.1655	1.34377	0.615821	2.18207	0.0291041	0.108443	CLBA1	Not Significant
ENSG00000072849	33.27	1.34362	0.61621	2.18046	0.0292235	0.108703	DERL2	Not Significant
ENSG00000130203	285.741	1.34354	0.697974	1.92491	0.0542409	0.160068	APOE	Not Significant
ENSG00000159363	188.194	1.34345	0.471677	2.84824	0.00439622	0.0356973	ATP13A2	Enriched
ENSG00000100364	1115.72	1.34338	0.521396	2.5765	0.00998063	0.0565707	KIAA0930	Not Significant
ENSG00000138074	332.651	1.34259	0.591291	2.27061	0.0231705	0.0948449	SLC5A6	Not Significant
ENSG00000166189	82.0236	1.34074	0.520792	2.57442	0.0100409	0.0566764	HPS6	Not Significant
ENSG00000032444	164.074	1.34028	0.489784	2.73646	0.00621034	0.0435835	PNPLA6	Enriched
ENSG00000162231	307.215	1.33959	0.443829	3.01826	0.00254227	0.025152	NXF1	Enriched
ENSG00000160233	11.5887	1.33918	0.810111	1.65309	0.0983134	NA	LRRC3	Not Significant
ENSG00000129911	129.938	1.33852	0.599275	2.23356	0.0255121	0.100852	KLF16	Not Significant
ENSG00000177951	251.46	1.33847	0.534588	2.50374	0.0122887	0.0643003	BET1L	Not Significant
ENSG00000105464	172.689	1.33783	0.555955	2.40637	0.0161119	0.0755103	GRIN2D	Not Significant
ENSG00000175283	37.9047	1.33698	0.717959	1.8622	0.0625753	0.174853	DOLK	Not Significant
ENSG00000090971	64.5135	1.33626	0.634284	2.10672	0.035142	0.121653	NAT14	Not Significant
ENSG00000291223	20.5994	1.3357	0.62035	2.15315	0.0313072	0.113564	FAM86DP	Not Significant
ENSG00000161395	16.7656	1.3355	0.715776	1.86581	0.0620682	0.173924	PGAP3	Not Significant
ENSG00000169385	25.4836	1.33438	0.580669	2.29801	0.0215611	0.090905	RNASE2	Not Significant
ENSG00000104731	247.884	1.3337	0.499469	2.67024	0.00757972	0.0485616	KLHDC4	Enriched
ENSG00000166278	12.4511	1.33329	0.865526	1.54044	0.123454	NA	C2	Not Significant
ENSG00000088298	83.3724	1.33322	0.474698	2.80856	0.0049763	0.0381203	EDEM2	Enriched
ENSG00000160691	215.317	1.33232	0.421815	3.15853	0.00158566	0.0192251	SHC1	Enriched
ENSG00000179611	70.2912	1.33197	0.5187	2.56791	0.0102314	0.057281	DGKZP1	Not Significant
ENSG00000167487	39.7955	1.33194	0.612531	2.17449	0.0296685	0.109783	KLHL26	Not Significant
ENSG00000196642	684.715	1.33148	0.468626	2.84125	0.00449371	0.0361409	RABL6	Enriched
ENSG00000167972	205.483	1.33121	0.527518	2.52354	0.0116181	0.0620045	ABCA3	Not Significant
ENSG00000161681	16.1391	1.33054	0.679493	1.95813	0.0502142	0.152775	SHANK1	Not Significant
ENSG00000137801	76.3404	1.33036	0.795304	1.67277	0.0943724	0.227115	THBS1	Not Significant
ENSG00000126464	273.715	1.32994	0.48061	2.7672	0.00565405	0.0413198	PRR12	Enriched
ENSG00000173581	66.6734	1.328	0.546949	2.42801	0.0151821	0.0730175	CCDC106	Not Significant
ENSG00000103260	37.5835	1.32724	0.594368	2.23302	0.0255475	0.100956	METRN	Not Significant
ENSG00000121297	25.4331	1.32723	0.641942	2.06752	0.0386854	0.129447	TSHZ3	Not Significant
ENSG00000160785	136.067	1.32645	0.463669	2.86076	0.00422622	0.034938	SLC25A44	Enriched
ENSG00000197837	23.297	1.32557	0.604175	2.19402	0.0282341	0.106322	H4C16	Not Significant
ENSG00000142039	110.484	1.3255	0.526422	2.51795	0.011804	0.0627256	CCDC97	Not Significant
ENSG00000160213	224.005	1.3247	0.474534	2.79158	0.00524515	0.0394357	CSTB	Enriched
ENSG00000205593	13.8435	1.32465	0.737382	1.79643	0.0724269	NA	DENND6B	Not Significant
ENSG00000107872	17.9468	1.32143	0.690587	1.91349	0.055686	0.162612	FBXL15	Not Significant
ENSG00000167930	145.983	1.32068	0.51241	2.57739	0.00995499	0.056513	FAM234A	Not Significant
ENSG00000175213	67.1749	1.32053	0.594344	2.22182	0.0262952	0.10242	ZNF408	Not Significant
ENSG00000169188	205.242	1.31877	0.472506	2.79102	0.00525425	0.0394771	APEX2	Enriched
ENSG00000106976	91.7581	1.31864	0.490575	2.68795	0.00718925	0.0472351	DNM1	Enriched
ENSG00000198356	155.829	1.31832	0.503198	2.61989	0.0087959	0.0525453	GET3	Not Significant
ENSG00000157445	20.3965	1.31811	0.655743	2.0101	0.0444205	0.141428	CACNA2D3	Not Significant
ENSG00000130734	83.6017	1.31763	0.59852	2.20148	0.0277021	0.105436	ATG4D	Not Significant
ENSG00000105556	97.22	1.31751	0.499495	2.63768	0.00834742	0.0510627	MIER2	Not Significant
ENSG00000131584	131.747	1.3174	0.577281	2.28207	0.022485	0.0929884	ACAP3	Not Significant
ENSG00000057657	30.7588	1.31692	0.538613	2.44502	0.0144843	0.0712128	PRDM1	Not Significant
ENSG00000254470	612.185	1.31682	0.499737	2.63503	0.00841287	0.0512914	AP5B1	Not Significant
ENSG00000170525	199.466	1.31624	0.439625	2.994	0.0027535	0.0266406	PFKFB3	Enriched
ENSG00000142186	383.526	1.31515	0.433341	3.03491	0.00240606	0.0244019	SCYL1	Enriched
ENSG00000165915	38.6155	1.31466	0.614885	2.13806	0.0325116	0.116278	SLC39A13	Not Significant
ENSG00000074855	21.1528	1.31461	0.613806	2.14173	0.0322151	0.115788	ANO8	Not Significant
ENSG00000100139	218.525	1.31265	0.478522	2.74314	0.00608545	0.0431214	MICALL1	Enriched
ENSG00000247626	88.5239	1.31257	0.44798	2.92998	0.00338979	0.0303834	MARS2	Enriched
ENSG00000254858	55.5159	1.31142	0.591896	2.21562	0.0267174	0.103288	MPV17L2	Not Significant
ENSG00000142330	70.1481	1.31133	0.561998	2.33333	0.0196309	0.0851241	CAPN10	Not Significant
ENSG00000232434	17.528	1.31125	0.765787	1.7123	0.0868422	0.215572	AJM1	Not Significant
ENSG00000170043	56.8116	1.31078	0.518405	2.52848	0.0114557	0.0614368	TRAPPC1	Not Significant
ENSG00000167967	135.089	1.31075	0.518067	2.53007	0.011404	0.0612497	E4F1	Not Significant
ENSG00000155034	130.506	1.31055	0.462052	2.83638	0.00456286	0.036324	FBXL18	Enriched
ENSG00000121680	54.3849	1.30975	0.567381	2.30842	0.0209758	0.0892264	PEX16	Not Significant
ENSG00000177728	173.488	1.30873	0.489726	2.67237	0.00753181	0.0483111	TMEM94	Enriched
ENSG00000250571	27.6943	1.30864	0.611182	2.14116	0.032261	0.115797	GLI4	Not Significant
ENSG00000158715	34.1569	1.30808	0.616218	2.12276	0.0337741	0.118816	SLC45A3	Not Significant
ENSG00000109113	32.6406	1.30804	0.5212	2.50968	0.012084	0.0637465	RAB34	Not Significant
ENSG00000166340	210.724	1.30722	0.62206	2.10145	0.0356019	0.12261	TPP1	Not Significant
ENSG00000140983	388.859	1.30709	0.506109	2.58263	0.00980513	0.0558357	RHOT2	Not Significant
ENSG00000162104	68.9794	1.30677	0.502432	2.60089	0.00929816	0.0539922	ADCY9	Not Significant
ENSG00000135966	203.531	1.30629	0.39999	3.26581	0.00109151	0.0153991	TGFBRAP1	Enriched
ENSG00000146066	120.661	1.30558	0.579921	2.25131	0.0243662	0.0980551	HIGD2A	Not Significant
ENSG00000185624	1931.7	1.30546	0.492247	2.65204	0.00800062	0.0498322	P4HB	Enriched
ENSG00000144647	75.1688	1.30521	0.535819	2.43591	0.0148542	0.0720495	POMGNT2	Not Significant
ENSG00000169660	24.3345	1.30454	0.632148	2.06366	0.0390502	0.130152	HEXD	Not Significant
ENSG00000159842	248.555	1.30367	0.474955	2.74483	0.00605421	0.0430285	ABR	Enriched
ENSG00000164889	889.597	1.30309	0.507644	2.56694	0.0102601	0.0573541	SLC4A2	Not Significant
ENSG00000175274	53.9266	1.30307	0.535519	2.43327	0.014963	0.072353	TP53I11	Not Significant
ENSG00000161267	20.1242	1.30299	0.632537	2.05994	0.0394045	0.130799	BDH1	Not Significant
ENSG00000213588	82.4986	1.30236	0.515709	2.52538	0.0115572	0.0618302	ZBTB9	Not Significant
ENSG00000110011	33.3032	1.30043	0.526138	2.47165	0.0134493	0.0678779	DNAJC4	Not Significant
ENSG00000115568	221.368	1.29946	0.407763	3.18681	0.0014385	0.01796	ZNF142	Enriched
ENSG00000149091	387.723	1.29923	0.47863	2.71446	0.0066383	0.0451596	DGKZ	Enriched
ENSG00000165271	434.116	1.29908	0.495175	2.62348	0.00870376	0.0523371	NOL6	Not Significant
ENSG00000133265	151.236	1.29825	0.5278	2.45973	0.013904	0.0693428	HSPBP1	Not Significant
ENSG00000204386	383.902	1.29817	0.460288	2.82035	0.00479718	0.0372691	NEU1	Enriched
ENSG00000213626	62.4787	1.29813	0.57251	2.26743	0.023364	0.0951398	LBH	Not Significant
ENSG00000004660	34.5852	1.29799	0.546497	2.37512	0.0175435	0.0794675	CAMKK1	Not Significant
ENSG00000182240	13.3416	1.29659	0.781694	1.65869	0.0971785	NA	BACE2	Not Significant
ENSG00000185896	305.309	1.29639	0.50084	2.58842	0.00964162	0.0552165	LAMP1	Not Significant
ENSG00000050426	199.473	1.29598	0.46473	2.78866	0.0052926	0.0396328	LETMD1	Enriched
ENSG00000173456	150.655	1.29577	0.496448	2.61009	0.00905184	0.0533188	RNF26	Not Significant
ENSG00000020129	171.788	1.2943	0.475685	2.72092	0.00650996	0.0447019	NCDN	Enriched
ENSG00000117676	426.193	1.29413	0.414506	3.12211	0.00179559	0.0205633	RPS6KA1	Enriched
ENSG00000164897	348.87	1.29374	0.570887	2.2662	0.0234393	0.0953466	TMUB1	Not Significant
ENSG00000163482	29.754	1.29323	0.686272	1.88442	0.0595078	0.168709	STK36	Not Significant
ENSG00000112812	15.1616	1.29274	0.651101	1.98547	0.0470921	0.14653	PRSS16	Not Significant
ENSG00000132635	23.2496	1.29224	0.604076	2.13919	0.0324199	0.116178	PCED1A	Not Significant
ENSG00000010295	20.7082	1.29196	0.724306	1.78372	0.0744693	0.196029	IFFO1	Not Significant
ENSG00000126215	94.5997	1.29175	0.472794	2.73217	0.0062919	0.0438253	XRCC3	Enriched
ENSG00000101412	110.409	1.29089	0.552487	2.33651	0.0194645	0.0847717	E2F1	Not Significant
ENSG00000167566	170.064	1.28975	0.545058	2.36627	0.0179684	0.0806591	NCKAP5L	Not Significant
ENSG00000099834	41.7914	1.2888	0.575655	2.23885	0.0251659	0.0999888	CDHR5	Not Significant
ENSG00000101337	202.632	1.28822	0.472587	2.72589	0.0064128	0.0442737	TM9SF4	Enriched
ENSG00000187609	14.9807	1.28761	0.693052	1.85789	0.0631852	0.176019	EXD3	Not Significant
ENSG00000131711	2658.6	1.28738	0.408146	3.15423	0.00160924	0.0193706	MAP1B	Enriched
ENSG00000068120	398.75	1.28721	0.406842	3.1639	0.00155668	0.0190025	COASY	Enriched
ENSG00000100258	88.9956	1.28701	0.607266	2.11934	0.0340615	0.119212	LMF2	Not Significant
ENSG00000090006	174.771	1.28586	0.507099	2.53572	0.0112216	0.0606865	LTBP4	Not Significant
ENSG00000158863	117.524	1.28582	0.475295	2.70531	0.00682397	0.0457741	FHIP2B	Enriched
ENSG00000168209	806.504	1.28574	0.573774	2.24084	0.0250361	0.099582	DDIT4	Not Significant
ENSG00000179134	420.964	1.28519	0.457709	2.80788	0.00498687	0.0381486	SAMD4B	Enriched
ENSG00000050820	94.2101	1.28473	0.58884	2.1818	0.0291245	0.108482	BCAR1	Not Significant
ENSG00000068971	30.0433	1.28437	0.55164	2.32828	0.0198972	0.0858714	PPP2R5B	Not Significant
ENSG00000135424	15.307	1.28412	0.654978	1.96055	0.0499317	0.152296	ITGA7	Not Significant
ENSG00000244165	23.9583	1.28333	0.69195	1.85465	0.0636458	0.176898	P2RY11	Not Significant
ENSG00000134686	384.36	1.28277	0.465591	2.75515	0.00586656	0.0421174	PHC2	Enriched
ENSG00000168005	172.694	1.28232	0.515496	2.48754	0.0128629	0.0660689	SPINDOC	Not Significant
ENSG00000172081	203.042	1.28182	0.486231	2.63624	0.00838298	0.0511951	MOB3A	Not Significant
ENSG00000005206	89.7727	1.28147	0.564955	2.26827	0.0233127	0.095072	SPPL2B	Not Significant
ENSG00000042493	86.7677	1.28147	0.604802	2.11883	0.0341052	0.119212	CAPG	Not Significant
ENSG00000137285	31.7397	1.28146	0.634372	2.02005	0.0433781	0.139201	TUBB2B	Not Significant
ENSG00000167394	25.0353	1.28111	0.622552	2.05783	0.0396065	0.131089	ZNF668	Not Significant
ENSG00000125869	21.9178	1.28029	0.585182	2.18785	0.0286805	0.107352	LAMP5	Not Significant
ENSG00000005486	81.3072	1.27965	0.593151	2.15737	0.0309769	0.112663	RHBDD2	Not Significant
ENSG00000183010	320.215	1.27931	0.50528	2.53188	0.0113453	0.0611142	PYCR1	Not Significant
ENSG00000127452	83.2487	1.27897	0.452684	2.8253	0.00472357	0.0368277	FBXL12	Enriched
ENSG00000137166	299.905	1.27887	0.481604	2.65543	0.00792068	0.0497573	FOXP4	Enriched
ENSG00000133069	13.2788	1.27887	0.71759	1.78217	0.0747219	NA	TMCC2	Not Significant
ENSG00000198324	39.4058	1.27844	0.646464	1.97759	0.0479747	0.148366	PHETA1	Not Significant
ENSG00000104885	637.946	1.27804	0.455902	2.80331	0.00505808	0.0384246	DOT1L	Enriched
ENSG00000099991	528.422	1.2779	0.3824	3.34178	0.000832417	0.0132054	CABIN1	Enriched
ENSG00000182704	67.8696	1.27728	0.551673	2.31529	0.0205971	0.0881253	TSKU	Not Significant
ENSG00000220008	9.09801	1.2771	0.893562	1.42922	0.15294	NA	LINGO3	Not Significant
ENSG00000117877	37.9051	1.27689	0.583454	2.18851	0.0286328	0.107351	POLR1G	Not Significant
ENSG00000011478	43.2309	1.27689	0.677004	1.88609	0.0592833	0.168489	QPCTL	Not Significant
ENSG00000171130	31.442	1.27671	0.648126	1.96984	0.0488567	0.150103	ATP6V0E2	Not Significant
ENSG00000213190	37.5388	1.27584	0.589028	2.166	0.0303109	0.111052	MLLT11	Not Significant
ENSG00000275464	26.5068	1.27572	0.5898	2.16297	0.0305434	0.111792	LOC102724159	Not Significant
ENSG00000157870	55.8334	1.27528	0.463276	2.75273	0.00591005	0.0423438	PRXL2B	Enriched
ENSG00000081692	41.0128	1.27394	0.669208	1.90365	0.0569561	0.165129	JMJD4	Not Significant
ENSG00000114859	32.4542	1.27296	0.571127	2.22886	0.025823	0.101491	CLCN2	Not Significant
ENSG00000275342	20.9437	1.27283	0.698771	1.82152	0.0685274	0.185802	PRAG1	Not Significant
ENSG00000293311	15.9299	1.27181	0.810588	1.56899	0.11665	0.257766	SMPD4BP	Not Significant
ENSG00000004777	14.6275	1.27165	0.695582	1.82818	0.067522	0.184038	ARHGAP33	Not Significant
ENSG00000122390	132.466	1.27122	0.472751	2.689	0.00716674	0.0471582	NAA60	Enriched
ENSG00000174059	29.3843	1.2712	0.924696	1.37473	0.169217	0.323614	CD34	Not Significant
ENSG00000180448	274.387	1.27088	0.622102	2.04288	0.041064	0.134532	ARHGAP45	Not Significant
ENSG00000138031	161.222	1.27063	0.463956	2.73868	0.00616858	0.0434855	ADCY3	Enriched
ENSG00000225190	98.5986	1.2706	0.480888	2.6422	0.00823697	0.0507268	PLEKHM1	Not Significant
ENSG00000099326	45.4265	1.27048	0.534243	2.37809	0.0174026	0.0792153	MZF1	Not Significant
ENSG00000127666	54.1363	1.27022	0.559865	2.2688	0.0232804	0.0950527	TICAM1	Not Significant
ENSG00000104853	308.949	1.26996	0.527488	2.40755	0.0160598	0.075363	CLPTM1	Not Significant
ENSG00000063761	35.035	1.2698	0.626053	2.02825	0.0425343	0.137843	ADCK1	Not Significant
ENSG00000102100	85.3407	1.26969	0.48406	2.623	0.00871591	0.0523814	SLC35A2	Not Significant
ENSG00000102312	10.886	1.26942	0.789304	1.60828	0.107775	NA	PORCN	Not Significant
ENSG00000177943	20.6727	1.26935	0.63662	1.99389	0.046164	0.144751	MAMDC4	Not Significant
ENSG00000135454	41.417	1.26884	0.567751	2.23486	0.0254266	0.100612	B4GALNT1	Not Significant
ENSG00000184060	8.58677	1.26884	1.06287	1.19379	0.232561	NA	ADAP2	Not Significant
ENSG00000158805	120.073	1.26845	0.514631	2.46477	0.0137102	0.0686576	ZNF276	Not Significant
ENSG00000188986	359.718	1.26751	0.472233	2.68407	0.00727323	0.0474578	NELFB	Enriched
ENSG00000113732	131.738	1.26722	0.553865	2.28796	0.02214	0.0923596	ATP6V0E1	Not Significant
ENSG00000103253	44.0891	1.26702	0.539272	2.34949	0.018799	0.0830826	HAGHL	Not Significant
ENSG00000154832	181.888	1.26688	0.438836	2.88692	0.00389038	0.0333174	CXXC1	Enriched
ENSG00000140474	99.7699	1.26648	0.475387	2.6641	0.00771949	0.0490627	ULK3	Enriched
ENSG00000090432	156.362	1.26629	0.519722	2.43648	0.0148309	0.072032	MUL1	Not Significant
ENSG00000084774	906.033	1.26597	0.406806	3.11198	0.00185837	0.0208297	CAD	Enriched
ENSG00000101187	53.6217	1.26588	0.490798	2.57924	0.00990178	0.0562401	SLCO4A1	Not Significant
ENSG00000102879	246.789	1.26567	0.489002	2.58827	0.00964601	0.0552165	CORO1A	Not Significant
ENSG00000166140	71.9074	1.26565	0.459228	2.75603	0.00585076	0.0421133	ZFYVE19	Enriched
ENSG00000135253	10.7043	1.26527	0.893514	1.41606	0.156758	NA	KCP	Not Significant
ENSG00000161091	242.013	1.26509	0.533278	2.37229	0.0176782	0.0797481	MFSD12	Not Significant
ENSG00000260630	30.2934	1.26504	0.621054	2.03692	0.0416579	0.135697	SNAI3-AS1	Not Significant
ENSG00000072121	239.563	1.26428	0.458458	2.75768	0.00582134	0.0420934	ZFYVE26	Enriched
ENSG00000078902	125.53	1.26224	0.502849	2.51017	0.0120673	0.0637194	TOLLIP	Not Significant
ENSG00000148985	58.8702	1.262	0.547178	2.30638	0.0210894	0.0895708	PGAP2	Not Significant
ENSG00000233016	109.06	1.26191	0.604848	2.08633	0.0369488	0.125446	SNHG7	Not Significant
ENSG00000114388	46.791	1.26159	0.533898	2.36298	0.0181288	0.0812793	NPRL2	Not Significant
ENSG00000135956	217.658	1.26078	0.555951	2.26779	0.023342	0.0951207	TMEM127	Not Significant
ENSG00000105568	440.954	1.25996	0.422804	2.98	0.00288245	0.0274283	PPP2R1A	Enriched
ENSG00000179526	73.111	1.25977	0.504624	2.49644	0.0125445	0.0649687	SHARPIN	Not Significant
ENSG00000182459	38.8807	1.25817	0.699312	1.79915	0.0719954	0.192049	TEX19	Not Significant
ENSG00000240771	26.1141	1.2578	0.576665	2.18116	0.0291714	0.108583	ARHGEF25	Not Significant
ENSG00000252835	12.5133	1.2575	0.764632	1.64458	0.100057	NA	SCARNA21	Not Significant
ENSG00000134049	25.2096	1.25652	0.74776	1.68037	0.0928849	0.225189	IER3IP1	Not Significant
ENSG00000063169	58.4339	1.25618	0.559641	2.24462	0.0247927	0.0991164	BICRA	Not Significant
ENSG00000213672	118.394	1.25483	0.440743	2.84708	0.00441223	0.0357214	NCKIPSD	Enriched
ENSG00000007237	137.559	1.25447	0.591349	2.12136	0.0338915	0.1189	GAS7	Not Significant
ENSG00000162512	306.798	1.25433	0.504559	2.48599	0.0129191	0.0661771	SDC3	Not Significant
ENSG00000149115	266.728	1.25386	0.460992	2.71991	0.00652992	0.0447661	TNKS1BP1	Enriched
ENSG00000234745	578.666	1.25304	0.531063	2.35949	0.0183002	0.0817467	HLA-B	Not Significant
ENSG00000173210	9.0063	1.25156	0.833269	1.50199	0.133099	NA	ABLIM3	Not Significant
ENSG00000085117	35.9019	1.25081	0.614912	2.03413	0.0419382	0.136234	CD82	Not Significant
ENSG00000173171	38.8399	1.2502	0.584509	2.13888	0.032445	0.116222	MTX1	Not Significant
ENSG00000181915	83.071	1.24995	0.533682	2.34212	0.0191745	0.0838439	ADO	Not Significant
ENSG00000141506	72.0133	1.24947	0.726069	1.72086	0.0852754	0.213373	PIK3R5	Not Significant
ENSG00000167700	28.8825	1.24891	0.677766	1.84269	0.0653737	0.180283	MFSD3	Not Significant
ENSG00000143382	417.493	1.24886	0.453819	2.75188	0.00592535	0.0424257	ADAMTSL4	Enriched
ENSG00000144589	55.1287	1.24844	0.55927	2.23227	0.0255972	0.101	STK11IP	Not Significant
ENSG00000009830	46.1736	1.24795	0.562231	2.21964	0.026443	0.102863	POMT2	Not Significant
ENSG00000121775	37.3622	1.24777	0.64994	1.91983	0.0548792	0.161197	TMEM39B	Not Significant
ENSG00000122133	15.8132	1.24653	0.906722	1.37476	0.169206	0.323614	PAEP	Not Significant
ENSG00000071894	580.876	1.24638	0.415413	3.00034	0.00269679	0.0261381	CPSF1	Enriched
ENSG00000169991	17.0067	1.24607	0.640875	1.94433	0.0518556	0.155524	IFFO2	Not Significant
ENSG00000251322	12.2395	1.24547	0.77499	1.60708	0.108038	NA	SHANK3	Not Significant
ENSG00000059122	131.706	1.24507	0.516158	2.41219	0.0158569	0.0748593	FLYWCH1	Not Significant
ENSG00000149541	110.715	1.24481	0.599504	2.07641	0.0378565	0.127452	B3GAT3	Not Significant
ENSG00000161180	31.9976	1.24471	0.615361	2.02272	0.0431015	0.138875	CCDC116	Not Significant
ENSG00000277027	9592.57	1.24456	0.546631	2.27678	0.0227995	0.0940287	RMRP	Not Significant
ENSG00000119523	97.8459	1.24424	0.468851	2.65382	0.00795871	0.0498089	ALG2	Enriched
ENSG00000205744	30.9942	1.24413	0.559031	2.2255	0.0260474	0.102012	DENND1C	Not Significant
ENSG00000167114	126.486	1.24411	0.575696	2.16106	0.0306906	0.112218	SLC27A4	Not Significant
ENSG00000224186	20.1095	1.24243	0.630935	1.96918	0.0489321	0.150112	PITX1-AS1	Not Significant
ENSG00000222489	41.3257	1.24096	0.597462	2.07705	0.037797	0.127291	SNORA79B	Not Significant
ENSG00000274290	65.1161	1.24069	0.491354	2.52504	0.0115686	0.0618608	H2BC6	Not Significant
ENSG00000167771	63.9644	1.24062	0.498834	2.48705	0.0128809	0.0661051	RCOR2	Not Significant
ENSG00000106351	31.5049	1.24049	0.537551	2.30768	0.0210171	0.0893212	AGFG2	Not Significant
ENSG00000105197	342.126	1.24029	0.474308	2.61495	0.00892403	0.0529358	TIMM50	Not Significant
ENSG00000139645	601.841	1.24023	0.469893	2.63938	0.00830569	0.050981	ANKRD52	Not Significant
ENSG00000101057	1212.83	1.24006	0.398158	3.1145	0.00184258	0.020791	MYBL2	Enriched
ENSG00000188290	16.5159	1.24005	0.722397	1.71658	0.0860562	0.214739	HES4	Not Significant
ENSG00000123329	59.6091	1.23884	0.486375	2.5471	0.0108624	0.0593585	ARHGAP9	Not Significant
ENSG00000198054	13.4335	1.23826	0.720049	1.71969	0.0854881	NA	DSCR8	Not Significant
ENSG00000106348	406.972	1.23805	0.455108	2.72033	0.00652161	0.0447371	IMPDH1	Enriched
ENSG00000139718	405.846	1.23786	0.498895	2.48121	0.0130937	0.0665429	SETD1B	Not Significant
ENSG00000133121	7.40234	1.2376	0.858199	1.44209	0.149278	NA	STARD13	Not Significant
ENSG00000175220	169.553	1.23738	0.537798	2.30082	0.0214016	0.0904758	ARHGAP1	Not Significant
ENSG00000106991	32.4003	1.23665	0.635304	1.94654	0.0515897	0.155066	ENG	Not Significant
ENSG00000167925	48.4194	1.23646	0.60267	2.05164	0.0402043	0.132667	GHDC	Not Significant
ENSG00000155287	43.5915	1.23602	0.533788	2.31557	0.0205817	0.0881222	SLC25A28	Not Significant
ENSG00000070614	552.498	1.23602	0.410955	3.00767	0.00263257	0.0257893	NDST1	Enriched
ENSG00000104907	192.867	1.23467	0.508084	2.43005	0.0150967	0.0728711	TRMT1	Not Significant
ENSG00000133317	10.2414	1.23388	0.740176	1.667	0.0955139	NA	LGALS12	Not Significant
ENSG00000137216	182.912	1.23343	0.455672	2.70683	0.00679291	0.0457193	TMEM63B	Enriched
ENSG00000151014	106.441	1.23298	0.431803	2.85543	0.00429782	0.0352904	NOCT	Enriched
ENSG00000169683	67.8316	1.2324	0.538298	2.28943	0.0220545	0.0921345	LRRC45	Not Significant
ENSG00000160796	561.153	1.23203	0.444982	2.76873	0.00562761	0.041154	NBEAL2	Enriched
ENSG00000100726	194.442	1.23157	0.55036	2.23776	0.0252366	0.100048	TELO2	Not Significant
ENSG00000017483	265.856	1.23124	0.515836	2.38689	0.0169917	0.0781166	SLC38A5	Not Significant
ENSG00000248905	7.40681	1.23121	0.894908	1.3758	0.168885	NA	FMN1	Not Significant
ENSG00000266962	12.4985	1.23075	0.730167	1.68557	0.0918783	NA	HSD17B1-AS1	Not Significant
ENSG00000134871	14.6068	1.23037	0.687068	1.79075	0.0733338	0.194531	COL4A2	Not Significant
ENSG00000168569	25.2095	1.23016	0.613748	2.00434	0.0450336	0.142388	TMEM223	Not Significant
ENSG00000172009	324.643	1.22985	0.449478	2.73618	0.00621567	0.0435835	THOP1	Enriched
ENSG00000110057	46.1374	1.22939	0.613799	2.00293	0.0451852	0.142743	UNC93B1	Not Significant
ENSG00000141349	73.5906	1.22898	0.517069	2.37683	0.0174622	0.0792962	G6PC3	Not Significant
ENSG00000105771	142.449	1.22771	0.491718	2.49679	0.0125325	0.0649687	SMG9	Not Significant
ENSG00000143543	59.7661	1.22753	0.557593	2.20147	0.0277026	0.105436	JTB	Not Significant
ENSG00000105676	193.716	1.22745	0.487834	2.51613	0.0118653	0.0629257	ARMC6	Not Significant
ENSG00000198355	152.266	1.22739	0.539532	2.27491	0.0229115	0.0943485	PIM3	Not Significant
ENSG00000275713	185.138	1.22728	0.464414	2.64264	0.00822625	0.0507129	H2BC9	Not Significant
ENSG00000172936	161.438	1.22724	0.410561	2.98917	0.00279739	0.0268756	MYD88	Enriched
ENSG00000214022	1228.26	1.22697	0.402361	3.04942	0.00229281	0.0236664	REPIN1	Enriched
ENSG00000140044	32.9687	1.22675	0.559363	2.19312	0.0282987	0.106492	JDP2	Not Significant
ENSG00000114268	332.894	1.22646	0.428249	2.8639	0.00418454	0.0347812	PFKFB4	Enriched
ENSG00000100368	31.3762	1.22621	0.703103	1.74399	0.0811606	0.206293	CSF2RB	Not Significant
ENSG00000167657	106.651	1.22607	0.536893	2.28364	0.0223928	0.092873	DAPK3	Not Significant
ENSG00000181638	55.2151	1.22604	0.5022	2.44134	0.0146327	0.0716408	ZFP41	Not Significant
ENSG00000176393	159.751	1.22581	0.44464	2.75686	0.00583602	0.0420959	RNPEP	Enriched
ENSG00000074370	300.151	1.22566	0.495973	2.47122	0.0134652	0.0679035	ATP2A3	Not Significant
ENSG00000179403	15.7757	1.22522	0.716818	1.70924	0.087406	0.216237	VWA1	Not Significant
ENSG00000188522	74.791	1.22512	0.471791	2.59674	0.00941129	0.0544702	FAM83G	Not Significant
ENSG00000116133	681.389	1.22502	0.418286	2.92866	0.00340425	0.0304632	DHCR24	Enriched
ENSG00000183258	437.068	1.22438	0.4392	2.78774	0.00530766	0.0396609	DDX41	Enriched
ENSG00000201315	39.9611	1.22436	0.808838	1.51373	0.130094	0.275787	RN7SKP227	Not Significant
ENSG00000174996	86.0745	1.22398	0.480493	2.54734	0.0108546	0.0593457	KLC2	Not Significant
ENSG00000173039	225.75	1.22282	0.430703	2.83913	0.0045237	0.0362061	RELA	Enriched
ENSG00000135631	107.81	1.22279	0.48269	2.53328	0.0113001	0.0609306	RAB11FIP5	Not Significant
ENSG00000012232	151.813	1.22262	0.440551	2.77521	0.00551659	0.0405858	EXTL3	Enriched
ENSG00000176731	27.8546	1.22217	0.596199	2.04993	0.0403711	0.132903	RBIS	Not Significant
ENSG00000071564	843.703	1.22207	0.445476	2.74329	0.00608274	0.0431214	TCF3	Enriched
ENSG00000257727	34.5062	1.22165	0.567924	2.15109	0.0314693	0.113888	CNPY2	Not Significant
ENSG00000107819	25.5061	1.22106	0.604018	2.02156	0.0432217	0.139031	SFXN3	Not Significant
ENSG00000241839	82.0632	1.22066	0.500816	2.43733	0.014796	0.072022	PLEKHO2	Not Significant
ENSG00000141564	381.24	1.22056	0.421386	2.89653	0.00377312	0.0325165	RPTOR	Enriched
ENSG00000109062	160.892	1.22041	0.496764	2.45671	0.0140216	0.069644	NHERF1	Not Significant
ENSG00000169718	417.83	1.21921	0.466767	2.61203	0.00900069	0.053189	DUS1L	Not Significant
ENSG00000132510	212.466	1.21872	0.514296	2.36969	0.0178031	0.080081	KDM6B	Not Significant
ENSG00000020633	110.389	1.21867	0.567189	2.14861	0.0316653	0.114446	RUNX3	Not Significant
ENSG00000133243	107.481	1.21857	0.468879	2.59891	0.00935213	0.0542137	BTBD2	Not Significant
ENSG00000163956	423.883	1.21835	0.585162	2.08208	0.0373353	0.12624	LRPAP1	Not Significant
ENSG00000136848	8.45562	1.218	0.822999	1.47995	0.138886	NA	DAB2IP	Not Significant
ENSG00000142798	505.261	1.21792	0.516085	2.35993	0.0182783	0.0817158	HSPG2	Not Significant
ENSG00000163686	13.0092	1.21753	0.704944	1.72713	0.0841448	NA	ABHD6	Not Significant
ENSG00000033011	46.1784	1.21731	0.642995	1.89318	0.0583339	0.16696	ALG1	Not Significant
ENSG00000178605	54.4013	1.2172	0.504287	2.41371	0.015791	0.0746967	GTPBP6	Not Significant
ENSG00000087157	116.422	1.21588	0.470967	2.58167	0.00983238	0.0559038	PGS1	Not Significant
ENSG00000157593	198.167	1.21546	0.450528	2.69786	0.00697875	0.0463924	SLC35B2	Enriched
ENSG00000130822	11.6462	1.21519	0.786274	1.54551	0.122224	NA	PNCK	Not Significant
ENSG00000105223	463.539	1.21501	0.536462	2.26487	0.0235208	0.0954944	PLD3	Not Significant
ENSG00000143198	82.5263	1.2142	0.506299	2.39819	0.0164764	0.0765638	MGST3	Not Significant
ENSG00000100280	651.764	1.21388	0.401893	3.02042	0.00252428	0.0250871	AP1B1	Enriched
ENSG00000188807	255.172	1.21381	0.588764	2.06163	0.0392434	0.130518	TMEM201	Not Significant
ENSG00000110442	61.2763	1.21347	0.568372	2.13499	0.0327621	0.11693	COMMD9	Not Significant
ENSG00000083812	85.9717	1.21319	0.529452	2.29141	0.0219397	0.0918651	ZNF324	Not Significant
ENSG00000132613	129.899	1.21247	0.426979	2.83964	0.00451646	0.0362061	MTSS2	Enriched
ENSG00000162073	52.0547	1.21238	0.51142	2.37062	0.0177583	0.0799451	PAQR4	Not Significant
ENSG00000103264	116.782	1.21236	0.463056	2.61817	0.00884032	0.0527245	FBXO31	Not Significant
ENSG00000196743	110.631	1.21221	0.48024	2.52417	0.011597	0.0619224	GM2A	Not Significant
ENSG00000233223	10.3341	1.21179	0.983241	1.23245	0.217783	NA	MPDU1-AS1	Not Significant
ENSG00000183828	15.0581	1.21176	0.754696	1.60563	0.108356	0.246827	NUDT14	Not Significant
ENSG00000197238	96.2002	1.21151	0.527802	2.29539	0.0217109	0.0912736	H4C11	Not Significant
ENSG00000169972	84.2957	1.21118	0.653651	1.85294	0.0638903	0.177353	PUSL1	Not Significant
ENSG00000138964	88.8018	1.20977	0.475133	2.54616	0.0108914	0.0594159	PARVG	Not Significant
ENSG00000165752	26.2652	1.20967	0.54777	2.20835	0.0272198	0.104369	STK32C	Not Significant
ENSG00000033100	170.756	1.20885	0.550732	2.19498	0.0281647	0.106142	CHPF2	Not Significant
ENSG00000103197	329.926	1.20878	0.410781	2.94265	0.0032542	0.0297271	TSC2	Enriched
ENSG00000160602	14.5998	1.20869	0.679624	1.77847	0.0753273	0.19708	NEK8	Not Significant
ENSG00000105298	138.451	1.20756	0.493462	2.44711	0.0144006	0.0709482	CACTIN	Not Significant
ENSG00000077420	243.611	1.20749	0.434228	2.78078	0.0054229	0.0402749	APBB1IP	Enriched
ENSG00000182774	22.5388	1.2062	0.678689	1.77726	0.0755263	0.197186	RPS17	Not Significant
ENSG00000185359	382.515	1.20572	0.44904	2.68511	0.00725059	0.0474578	HGS	Enriched
ENSG00000138073	286.446	1.20554	0.44268	2.72327	0.00646392	0.0445085	PREB	Enriched
ENSG00000187775	13.108	1.20523	0.730266	1.6504	0.0988608	NA	DNAH17	Not Significant
ENSG00000160972	64.6842	1.20456	0.571715	2.10693	0.0351235	0.12165	PPP1R16A	Not Significant
ENSG00000116852	331.826	1.20443	0.433855	2.77611	0.00550132	0.040573	KIF21B	Enriched
ENSG00000162396	61.4446	1.2042	0.472973	2.54603	0.0108956	0.0594159	PARS2	Not Significant
ENSG00000132382	484.228	1.2042	0.501237	2.40245	0.0162858	0.0760327	MYBBP1A	Not Significant
ENSG00000116221	507.014	1.20399	0.513171	2.34618	0.0189668	0.0833991	MRPL37	Not Significant
ENSG00000118004	10.6236	1.20334	0.759149	1.58512	0.112939	NA	COLEC11	Not Significant
ENSG00000100906	77.4422	1.20302	0.557157	2.15922	0.0308332	0.112515	NFKBIA	Not Significant
ENSG00000100300	50.8946	1.20301	0.521201	2.30815	0.0209905	0.0892545	TSPO	Not Significant
ENSG00000100979	60.4425	1.20199	0.539847	2.22654	0.0259781	0.101886	PLTP	Not Significant
ENSG00000198952	1136.07	1.20125	0.423622	2.83568	0.00457287	0.0363245	SMG5	Enriched
ENSG00000237036	11.1498	1.20045	0.850765	1.41103	0.158236	NA	ZEB1-AS1	Not Significant
ENSG00000125817	240.097	1.20005	0.460948	2.60344	0.00922937	0.0537579	CENPB	Not Significant
ENSG00000139546	88.97	1.19973	0.548371	2.1878	0.0286839	0.107352	TARBP2	Not Significant
ENSG00000133935	50.7369	1.19972	0.534729	2.24361	0.0248574	0.0992262	ERG28	Not Significant
ENSG00000107719	25.7509	1.19966	0.589826	2.03392	0.0419598	0.136234	PALD1	Not Significant
ENSG00000198885	47.865	1.19872	0.517879	2.31468	0.0206307	0.0881347	ITPRIPL1	Not Significant
ENSG00000124766	41.922	1.19813	0.512766	2.3366	0.0194598	0.0847717	SOX4	Not Significant
ENSG00000159792	107.705	1.19813	0.474095	2.52719	0.0114981	0.0615557	PSKH1	Not Significant
ENSG00000096996	7.72906	1.198	1.03768	1.1545	0.248296	NA	IL12RB1	Not Significant
ENSG00000116991	11.9724	1.19794	0.758528	1.5793	0.114268	NA	SIPA1L2	Not Significant
ENSG00000068001	21.8362	1.19751	0.651949	1.83682	0.0662364	0.181612	HYAL2	Not Significant
ENSG00000006704	172.168	1.19735	0.464693	2.57664	0.00997656	0.0565707	GTF2IRD1	Not Significant
ENSG00000131409	76.5948	1.19717	0.677322	1.7675	0.0771438	0.199681	LRRC4B	Not Significant
ENSG00000069482	41.7122	1.19632	0.52861	2.26315	0.0236265	0.0957793	GAL	Not Significant
ENSG00000183864	198.3	1.19553	0.44715	2.67367	0.00750269	0.0482089	TOB2	Enriched
ENSG00000125505	564.091	1.19505	0.61416	1.94583	0.0516757	0.155194	MBOAT7	Not Significant
ENSG00000068137	90.2039	1.19475	0.549518	2.17417	0.0296924	0.109814	PLEKHH3	Not Significant
ENSG00000225663	59.0876	1.19468	0.671854	1.77818	0.0753737	0.197101	MCRIP1	Not Significant
ENSG00000027847	47.9518	1.19429	0.531117	2.24864	0.0245357	0.0984482	B4GALT7	Not Significant
ENSG00000129566	92.4109	1.19413	0.455168	2.62349	0.00870342	0.0523371	TEP1	Not Significant
ENSG00000159063	118.196	1.1941	0.533181	2.23958	0.0251181	0.099835	ALG8	Not Significant
ENSG00000119431	31.4714	1.19248	0.593242	2.01011	0.0444192	0.141428	HDHD3	Not Significant
ENSG00000130635	31.9299	1.1918	0.594119	2.006	0.0448559	0.141949	COL5A1	Not Significant
ENSG00000068903	95.7101	1.19175	0.476125	2.50301	0.0123142	0.0643107	SIRT2	Not Significant
ENSG00000130726	2418.22	1.19166	0.407938	2.92117	0.0034872	0.0309779	TRIM28	Enriched
ENSG00000185650	149.439	1.19157	0.475164	2.50771	0.0121516	0.0639491	ZFP36L1	Not Significant
ENSG00000155254	101.958	1.19137	0.471065	2.52909	0.0114359	0.0613608	MARVELD1	Not Significant
ENSG00000179958	104.792	1.19118	0.492237	2.41993	0.0155235	0.0739138	DCTPP1	Not Significant
ENSG00000114650	405.717	1.19117	0.485306	2.45448	0.0141089	0.0699508	SCAP	Not Significant
ENSG00000100926	10.2174	1.19102	0.809032	1.47215	0.140981	NA	TM9SF1	Not Significant
ENSG00000140400	72.8747	1.18943	0.530072	2.24391	0.0248383	0.0991926	MAN2C1	Not Significant
ENSG00000185507	31.8106	1.18875	0.603999	1.96813	0.0490527	0.150368	IRF7	Not Significant
ENSG00000100083	169.508	1.18846	0.446062	2.66434	0.00771395	0.0490627	GGA1	Enriched
ENSG00000118894	27.2322	1.18738	0.581561	2.04171	0.0411805	0.134709	EEF2KMT	Not Significant
ENSG00000133246	94.8944	1.187	0.526675	2.25376	0.0242115	0.0975758	PRAM1	Not Significant
ENSG00000132004	16.3485	1.18673	0.630932	1.88091	0.059984	0.169426	FBXW9	Not Significant
ENSG00000167378	179.202	1.18637	0.474649	2.49948	0.0124377	0.0646285	IRGQ	Not Significant
ENSG00000073060	245.382	1.18594	0.430181	2.75685	0.00583616	0.0420959	SCARB1	Enriched
ENSG00000136699	425.233	1.1858	0.440795	2.69013	0.00714238	0.0470805	SMPD4	Enriched
ENSG00000143258	77.6913	1.18577	0.490886	2.41556	0.0157109	0.0744586	USP21	Not Significant
ENSG00000108819	563.287	1.18567	0.514148	2.30609	0.0211058	0.0895729	PPP1R9B	Not Significant
ENSG00000196700	275.184	1.18541	0.516349	2.29575	0.02169	0.091273	ZNF512B	Not Significant
ENSG00000136247	84.4793	1.18524	0.551484	2.14918	0.0316202	0.114358	ZDHHC4	Not Significant
ENSG00000058262	700.998	1.18485	0.48461	2.44496	0.0144868	0.0712128	SEC61A1	Not Significant
ENSG00000162695	89.7778	1.1847	0.44828	2.64278	0.00822294	0.0507129	SLC30A7	Not Significant
ENSG00000114631	131.743	1.18453	0.581428	2.03728	0.0416215	0.135697	PODXL2	Not Significant
ENSG00000115457	28.4737	1.18449	0.546394	2.16784	0.0301712	0.110837	IGFBP2	Not Significant
ENSG00000153395	232.034	1.18378	0.490901	2.41145	0.0158892	0.0749259	LPCAT1	Not Significant
ENSG00000167770	185.347	1.18332	0.50731	2.33253	0.0196728	0.0852382	OTUB1	Not Significant
ENSG00000097007	1232.31	1.18327	0.40785	2.90123	0.00371702	0.0321848	ABL1	Enriched
ENSG00000171302	261.452	1.18293	0.428531	2.76044	0.0057723	0.0419046	CANT1	Enriched
ENSG00000007541	83.4543	1.18285	0.605095	1.95481	0.0506054	0.153412	PIGQ	Not Significant
ENSG00000161013	332.333	1.18218	0.464176	2.54684	0.0108702	0.059372	MGAT4B	Not Significant
ENSG00000169750	242.708	1.18205	0.530857	2.22668	0.0259689	0.101886	RAC3	Not Significant
ENSG00000125826	168.98	1.18196	0.474418	2.49139	0.0127246	0.0655793	RBCK1	Not Significant
ENSG00000204469	4277.46	1.18193	0.441985	2.67413	0.00749225	0.0482089	PRRC2A	Enriched
ENSG00000135931	15.5244	1.18106	0.656399	1.7993	0.0719708	0.192049	ARMC9	Not Significant
ENSG00000146858	26.6805	1.18095	0.604781	1.95269	0.050856	0.153873	ZC3HAV1L	Not Significant
ENSG00000145022	38.2611	1.18046	0.505056	2.33728	0.0194247	0.0847027	TCTA	Not Significant
ENSG00000062282	8.78886	1.17927	0.807016	1.46127	0.143941	NA	DGAT2	Not Significant
ENSG00000143368	251.604	1.17911	0.497275	2.37113	0.0177336	0.0798721	SF3B4	Not Significant
ENSG00000177963	370.474	1.17901	0.46414	2.54021	0.0110785	0.0600608	RIC8A	Not Significant
ENSG00000168394	122.008	1.17879	0.557563	2.11419	0.0344989	0.120209	TAP1	Not Significant
ENSG00000173153	222.726	1.17853	0.490213	2.40412	0.0162116	0.0758154	ESRRA	Not Significant
ENSG00000290865	12.6518	1.17848	0.694877	1.69596	0.0898941	NA	RRN3P3	Not Significant
ENSG00000164362	18.755	1.17704	0.743868	1.58232	0.113577	0.25414	TERT	Not Significant
ENSG00000268621	35.4599	1.17567	0.544244	2.16018	0.0307584	0.112422	IGFL2-AS1	Not Significant
ENSG00000125459	43.965	1.1756	0.53778	2.18602	0.028814	0.107692	MSTO1	Not Significant
ENSG00000179409	222.135	1.17558	0.397008	2.96111	0.00306532	0.0285732	GEMIN4	Enriched
ENSG00000247982	19.9518	1.17556	0.721711	1.62885	0.103345	0.240438	LINC00926	Not Significant
ENSG00000123975	124.346	1.17532	0.450405	2.60947	0.00906821	0.0533866	CKS2	Not Significant
ENSG00000090372	497.756	1.1748	0.434055	2.70657	0.00679825	0.0457193	STRN4	Enriched
ENSG00000186501	96.9864	1.17449	0.517332	2.27028	0.0231907	0.0948923	TMEM222	Not Significant
ENSG00000118939	19.8314	1.17445	0.762454	1.54035	0.123474	0.266336	UCHL3	Not Significant
ENSG00000148335	75.1899	1.17429	0.51875	2.26368	0.0235935	0.0956932	NTMT1	Not Significant
ENSG00000102032	33.3324	1.17413	0.631871	1.85818	0.063144	0.175994	RENBP	Not Significant
ENSG00000149932	83.0528	1.17412	0.533511	2.20075	0.0277537	0.105528	TMEM219	Not Significant
ENSG00000103024	27.8022	1.17411	0.630773	1.86139	0.0626896	0.175039	NME3	Not Significant
ENSG00000148341	160.974	1.1739	0.460063	2.55161	0.0107227	0.0588614	SH3GLB2	Not Significant
ENSG00000198198	348.488	1.17347	0.396984	2.95596	0.00311692	0.0289312	SZT2	Enriched
ENSG00000167508	202.889	1.17295	0.475326	2.46768	0.0135993	0.0683509	MVD	Not Significant
ENSG00000204410	18.039	1.17278	0.683258	1.71645	0.086079	0.214747	MSH5	Not Significant
ENSG00000158062	41.7507	1.17213	0.621664	1.88547	0.0593665	0.168655	UBXN11	Not Significant
ENSG00000104884	156.229	1.17177	0.448554	2.61234	0.00899251	0.053189	ERCC2	Not Significant
ENSG00000164620	15.2481	1.17141	0.693855	1.68826	0.0913607	0.222673	RELL2	Not Significant
ENSG00000075234	61.7775	1.1711	0.492543	2.37766	0.0174227	0.0792153	TTC38	Not Significant
ENSG00000131759	145.042	1.17083	0.486384	2.40721	0.0160748	0.0753686	RARA	Not Significant
ENSG00000105699	116.884	1.1706	0.505186	2.31717	0.0204943	0.0879288	LSR	Not Significant
ENSG00000077312	173.788	1.17031	0.499681	2.34211	0.019175	0.0838439	SNRPA	Not Significant
ENSG00000071655	357.769	1.17017	0.556076	2.10434	0.0353489	0.122084	MBD3	Not Significant
ENSG00000198960	11.9757	1.16976	0.708949	1.64999	0.0989449	NA	ARMCX6	Not Significant
ENSG00000132965	287.221	1.16826	0.539181	2.16673	0.0302557	0.110887	ALOX5AP	Not Significant
ENSG00000108773	157.821	1.16796	0.459389	2.54242	0.0110088	0.0598307	KAT2A	Not Significant
ENSG00000130766	154.164	1.16766	0.478782	2.43881	0.0147356	0.0719515	SESN2	Not Significant
ENSG00000105726	226.552	1.1671	0.523658	2.22874	0.025831	0.101491	ATP13A1	Not Significant
ENSG00000180902	38.3018	1.16703	0.510316	2.28687	0.0222036	0.0924182	D2HGDH	Not Significant
ENSG00000275379	80.0656	1.16642	0.465838	2.50392	0.0122824	0.0642981	H3C11	Not Significant
ENSG00000105612	60.6592	1.16625	0.537078	2.17147	0.0298955	0.110304	DNASE2	Not Significant
ENSG00000117362	294.786	1.16622	0.540571	2.15738	0.0309764	0.112663	APH1A	Not Significant
ENSG00000136718	315.619	1.16584	0.501534	2.32455	0.0200961	0.0866615	IMP4	Not Significant
ENSG00000164086	164.008	1.16568	0.52622	2.21519	0.026747	0.103349	DUSP7	Not Significant
ENSG00000103245	72.3938	1.16492	0.559644	2.08153	0.0373851	0.12633	CIAO3	Not Significant
ENSG00000112759	312.15	1.1649	0.569216	2.0465	0.0407075	0.133724	SLC29A1	Not Significant
ENSG00000006432	27.4821	1.16475	0.574686	2.02675	0.0426875	0.138138	MAP3K9	Not Significant
ENSG00000189343	44.8162	1.16464	0.554207	2.10145	0.0356014	0.12261	RPS2P46	Not Significant
ENSG00000159733	46.9276	1.1641	0.530732	2.19338	0.02828	0.106458	ZFYVE28	Not Significant
ENSG00000164896	146.953	1.16402	0.545704	2.13307	0.0329192	0.117239	FASTK	Not Significant
ENSG00000185000	67.3769	1.16272	0.538425	2.15948	0.030813	0.112515	DGAT1	Not Significant
ENSG00000164758	12.3749	1.16234	0.7599	1.5296	0.126117	NA	MED30	Not Significant
ENSG00000141858	335	1.16118	0.5098	2.27771	0.0227436	0.0938687	SAMD1	Not Significant
ENSG00000006534	19.7348	1.16095	0.693183	1.67482	0.0939705	0.226546	ALDH3B1	Not Significant
ENSG00000116212	126.7	1.16093	0.442794	2.62183	0.00874596	0.0524758	LRRC42	Not Significant
ENSG00000178607	88.4153	1.16036	0.486824	2.38354	0.0171471	0.0786207	ERN1	Not Significant
ENSG00000170265	218.831	1.1595	0.485405	2.38874	0.0169065	0.0779029	ZNF282	Not Significant
ENSG00000141682	81.1084	1.15932	0.516458	2.24476	0.0247838	0.0991164	PMAIP1	Not Significant
ENSG00000119559	155.272	1.15791	0.52037	2.22516	0.0260704	0.102066	C19orf25	Not Significant
ENSG00000188243	22.7502	1.15785	0.681956	1.69784	0.089538	0.219972	COMMD6	Not Significant
ENSG00000101298	290.935	1.15771	0.463724	2.49654	0.0125411	0.0649687	SNPH	Not Significant
ENSG00000174177	194.807	1.15726	0.52404	2.20834	0.0272206	0.104369	CTU2	Not Significant
ENSG00000141522	441.264	1.15723	0.552023	2.09635	0.0360515	0.123598	ARHGDIA	Not Significant
ENSG00000108591	55.7668	1.15669	0.49289	2.34674	0.0189384	0.0833747	DRG2	Not Significant
ENSG00000168003	463.664	1.15646	0.493552	2.34314	0.0191223	0.0838141	SLC3A2	Not Significant
ENSG00000125755	507.149	1.15626	0.407021	2.84078	0.00450036	0.0361414	SYMPK	Enriched
ENSG00000147206	14.1079	1.15562	0.899056	1.28537	0.198662	NA	NXF3	Not Significant
ENSG00000186111	282.801	1.15556	0.523881	2.20577	0.0273999	0.104764	PIP5K1C	Not Significant
ENSG00000263528	45.5503	1.15489	0.514831	2.24324	0.0248816	0.0992262	IKBKE	Not Significant
ENSG00000115657	8.64832	1.15375	0.844985	1.36541	0.172124	NA	ABCB6	Not Significant
ENSG00000117682	175.847	1.15364	0.451196	2.55684	0.0105626	0.0584196	DHDDS	Not Significant
ENSG00000114779	107.485	1.15318	0.523278	2.20376	0.0275412	0.105121	ABHD14B	Not Significant
ENSG00000014164	143.144	1.15288	0.426178	2.70516	0.00682706	0.0457741	ZC3H3	Enriched
ENSG00000100350	211.349	1.15258	0.549218	2.09858	0.0358541	0.123208	FOXRED2	Not Significant
ENSG00000130175	764.833	1.15147	0.468054	2.46013	0.0138887	0.0693428	PRKCSH	Not Significant
ENSG00000087086	5723.3	1.15053	0.465924	2.46934	0.0135361	0.0681122	FTL	Not Significant
ENSG00000143452	14.9548	1.15018	0.670727	1.71482	0.0863786	0.215083	HORMAD1	Not Significant
ENSG00000198933	66.6216	1.14949	0.51986	2.21115	0.0270254	0.103875	TBKBP1	Not Significant
ENSG00000075399	27.3986	1.14849	0.622003	1.84644	0.0648283	0.179235	VPS9D1	Not Significant
ENSG00000136830	208.749	1.14755	0.51298	2.23703	0.0252846	0.100097	NIBAN2	Not Significant
ENSG00000117308	120.941	1.14713	0.428994	2.67399	0.00749553	0.0482089	GALE	Enriched
ENSG00000132330	16.2613	1.14659	0.6495	1.76534	0.0775058	0.200287	SCLY	Not Significant
ENSG00000198276	64.9472	1.14657	0.541164	2.11871	0.034115	0.119212	UCKL1	Not Significant
ENSG00000124587	161.682	1.14655	0.428059	2.67849	0.00739539	0.0478353	PEX6	Enriched
ENSG00000104635	217.942	1.14621	0.431682	2.65521	0.00792585	0.0497574	SLC39A14	Enriched
ENSG00000167702	53.2505	1.1461	0.683369	1.67713	0.0935177	0.226119	KIFC2	Not Significant
ENSG00000254999	300.74	1.14598	0.486863	2.35379	0.0185829	0.0825054	BRK1	Not Significant
ENSG00000136379	11.6738	1.14593	0.742037	1.5443	0.122515	NA	ABHD17C	Not Significant
ENSG00000167565	64.7274	1.14586	0.478838	2.393	0.0167111	0.0772291	SERTAD3	Not Significant
ENSG00000003249	35.976	1.1455	0.562294	2.0372	0.0416303	0.135697	DBNDD1	Not Significant
ENSG00000130165	189.933	1.14543	0.515156	2.22347	0.0261843	0.10222	ELOF1	Not Significant
ENSG00000131165	276.833	1.14537	0.503779	2.27356	0.0229927	0.0943896	CHMP1A	Not Significant
ENSG00000158019	49.9565	1.14474	0.603789	1.89593	0.0579697	0.166308	BABAM2	Not Significant
ENSG00000159840	645.32	1.14403	0.462602	2.47303	0.0133974	0.067741	ZYX	Not Significant
ENSG00000185340	50.4483	1.14401	0.662083	1.72789	0.0840077	0.211074	GAS2L1	Not Significant
ENSG00000163945	71.3838	1.14364	0.478833	2.38839	0.0169223	0.0779095	UVSSA	Not Significant
ENSG00000146535	246.87	1.14337	0.400406	2.85553	0.00429652	0.0352904	GNA12	Enriched
ENSG00000104814	26.134	1.14296	0.569412	2.00726	0.0447223	0.141731	MAP4K1	Not Significant
ENSG00000204394	1798.18	1.14267	0.427374	2.67369	0.00750217	0.0482089	VARS1	Enriched
ENSG00000162772	64.3026	1.14237	0.512486	2.22908	0.0258084	0.101491	ATF3	Not Significant
ENSG00000105429	363.805	1.14229	0.560544	2.03782	0.0415675	0.135574	MEGF8	Not Significant
ENSG00000233837	12.7927	1.14219	0.687617	1.66109	0.0966956	NA	EIF3LP2	Not Significant
ENSG00000265681	17.6583	1.14211	0.641829	1.77947	0.0751636	0.196833	RPL17	Not Significant
ENSG00000270170	83.0944	1.1415	0.442966	2.57695	0.00996763	0.0565555	NCBP2AS2	Not Significant
ENSG00000076924	165.552	1.14149	0.428709	2.66261	0.00775375	0.0491026	XAB2	Enriched
ENSG00000139269	13.5574	1.14147	0.820774	1.39073	0.164307	NA	INHBE	Not Significant
ENSG00000197818	52.2376	1.14146	0.578246	1.974	0.0483816	0.149103	SLC9A8	Not Significant
ENSG00000136630	22.6477	1.14119	0.693312	1.646	0.0997633	0.235133	HLX	Not Significant
ENSG00000197586	122.572	1.14115	0.472566	2.41479	0.0157441	0.0745516	ENTPD6	Not Significant
ENSG00000197785	563.562	1.14077	0.530928	2.14864	0.0316632	0.114446	ATAD3A	Not Significant
ENSG00000126106	7.24195	1.14077	0.870199	1.31093	0.189882	NA	TMEM53	Not Significant
ENSG00000107954	9.69558	1.14073	0.771633	1.47833	0.139319	NA	NEURL1	Not Significant
ENSG00000198336	176.049	1.14065	0.458699	2.48671	0.0128929	0.0661356	MYL4	Not Significant
ENSG00000173114	11.9768	1.14054	0.736598	1.54839	0.121528	NA	LRRN3	Not Significant
ENSG00000266074	209.96	1.14053	0.518438	2.19993	0.027812	0.105631	BAHCC1	Not Significant
ENSG00000132661	34.495	1.14051	0.629667	1.81129	0.0700965	0.188876	NXT1	Not Significant
ENSG00000127824	169.817	1.14013	0.507485	2.24664	0.0246633	0.0988157	TUBA4A	Not Significant
ENSG00000197226	498.193	1.13996	0.463574	2.45907	0.0139298	0.0694219	TBC1D9B	Not Significant
ENSG00000214279	42.1805	1.13884	0.72623	1.56815	0.116847	0.257929	SCART1	Not Significant
ENSG00000054611	87.5651	1.13869	0.431391	2.63958	0.00830098	0.050981	TBC1D22A	Not Significant
ENSG00000008324	59.5403	1.13865	0.500346	2.27573	0.0228623	0.0942166	SS18L2	Not Significant
ENSG00000135929	73.6237	1.13861	0.711637	1.59998	0.109602	0.248749	CYP27A1	Not Significant
ENSG00000127511	155.073	1.13843	0.441319	2.5796	0.00989146	0.0562106	SIN3B	Not Significant
ENSG00000278588	118.731	1.13833	0.467143	2.4368	0.0148181	0.072032	H2BC10	Not Significant
ENSG00000117411	261.629	1.13788	0.425097	2.67676	0.00743386	0.0479478	B4GALT2	Enriched
ENSG00000178538	236.534	1.13773	0.457899	2.48466	0.0129674	0.066182	CA8	Not Significant
ENSG00000105220	1600.21	1.1371	0.449228	2.53123	0.0113663	0.0611369	GPI	Not Significant
ENSG00000126705	260.847	1.13709	0.4389	2.59077	0.00957623	0.0550426	AHDC1	Not Significant
ENSG00000095539	16.6226	1.13664	0.679798	1.67203	0.0945187	0.227403	SEMA4G	Not Significant
ENSG00000146242	10.8743	1.13611	0.757021	1.50077	0.133415	NA	TPBG	Not Significant
ENSG00000198208	24.8646	1.13592	0.668689	1.69872	0.0893721	0.219712	RPS6KL1	Not Significant
ENSG00000101104	29.9869	1.1358	0.553429	2.05229	0.0401416	0.1325	PABPC1L	Not Significant
ENSG00000160877	409.653	1.13566	0.523154	2.17079	0.029947	0.110457	NACC1	Not Significant
ENSG00000126003	260.54	1.13451	0.504166	2.25028	0.0244311	0.0982141	PLAGL2	Not Significant
ENSG00000157927	22.6223	1.13395	0.628214	1.80505	0.0710676	0.190715	RADIL	Not Significant
ENSG00000075702	165.472	1.13325	0.461066	2.45788	0.0139758	0.0695429	WDR62	Not Significant
ENSG00000144659	168.34	1.13323	0.44182	2.56492	0.0103199	0.0576	SLC25A38	Not Significant
ENSG00000180089	13.0827	1.13312	0.780238	1.45228	0.146425	NA	TMEM86B	Not Significant
ENSG00000174775	72.7487	1.13234	0.511496	2.21379	0.0268433	0.103466	HRAS	Not Significant
ENSG00000143862	68.0531	1.13208	0.519074	2.18096	0.0291865	0.108602	ARL8A	Not Significant
ENSG00000117410	383.302	1.13201	0.548949	2.06214	0.0391941	0.130433	ATP6V0B	Not Significant
ENSG00000162413	422.226	1.13088	0.47112	2.40042	0.0163763	0.0763254	KLHL21	Not Significant
ENSG00000105662	24.9499	1.13072	0.728967	1.55113	0.120872	0.262844	CRTC1	Not Significant
ENSG00000155463	346.219	1.13029	0.410179	2.7556	0.00585841	0.0421174	OXA1L	Enriched
ENSG00000135912	313.116	1.12988	0.390958	2.89004	0.00385193	0.0330398	TTLL4	Enriched
ENSG00000163975	43.0723	1.12962	0.597034	1.89205	0.0584845	0.167304	MELTF	Not Significant
ENSG00000284668	54.0778	1.12961	0.484042	2.33371	0.019611	0.0850859	LINC02780	Not Significant
ENSG00000182979	262.508	1.12956	0.430939	2.62116	0.00876315	0.0524927	MTA1	Not Significant
ENSG00000105085	61.8542	1.12946	0.466171	2.42285	0.0153993	0.0736183	MED26	Not Significant
ENSG00000175826	111.025	1.12928	0.494	2.286	0.0222545	0.092547	CTDNEP1	Not Significant
ENSG00000125319	42.7451	1.12926	0.551132	2.04898	0.0404643	0.133124	HROB	Not Significant
ENSG00000064687	213.544	1.12913	0.512569	2.20288	0.0276032	0.105321	ABCA7	Not Significant
ENSG00000152689	15.8508	1.12905	0.715324	1.57838	0.114479	0.255197	RASGRP3	Not Significant
ENSG00000037897	40.4543	1.12869	0.548881	2.05635	0.039749	0.131481	METTL1	Not Significant
ENSG00000160404	45.5597	1.12863	0.581693	1.94026	0.0523483	0.156573	TOR2A	Not Significant
ENSG00000106266	155.091	1.12839	0.503349	2.24177	0.0249763	0.0994515	SNX8	Not Significant
ENSG00000135637	20.3625	1.12837	0.639083	1.7656	0.0774625	0.20027	CCDC142	Not Significant
ENSG00000105287	197.695	1.12794	0.425608	2.65019	0.00804477	0.0499587	PRKD2	Enriched
ENSG00000175806	30.6043	1.12749	0.603286	1.86892	0.0616337	0.173016	MSRA	Not Significant
ENSG00000020181	9.51727	1.12746	0.787016	1.43258	0.151979	NA	ADGRA2	Not Significant
ENSG00000223865	12.8728	1.12678	0.689699	1.63373	0.102316	NA	HLA-DPB1	Not Significant
ENSG00000101311	8.66234	1.12667	0.822921	1.36911	0.170965	NA	FERMT1	Not Significant
ENSG00000249471	66.3073	1.12651	0.467403	2.41016	0.0159457	0.0750328	ZNF324B	Not Significant
ENSG00000189077	38.6453	1.12646	0.584599	1.92689	0.0539931	0.159664	TMEM120A	Not Significant
ENSG00000227500	94.4317	1.12626	0.597611	1.8846	0.0594836	0.168709	SCAMP4	Not Significant
ENSG00000107338	66.4616	1.12606	0.517634	2.17541	0.0295996	0.109619	SHB	Not Significant
ENSG00000187778	219.169	1.12527	0.412398	2.7286	0.00636047	0.0441133	MCRS1	Enriched
ENSG00000130204	602.243	1.12462	0.52408	2.14589	0.031882	0.115002	TOMM40	Not Significant
ENSG00000173262	15.6385	1.12453	0.706303	1.59214	0.111353	0.251103	SLC2A14	Not Significant
ENSG00000134815	219.6	1.12433	0.477015	2.35702	0.0184222	0.0820274	DHX34	Not Significant
ENSG00000235703	11.6799	1.1242	0.811318	1.38565	0.165855	NA	EOLA2-DT	Not Significant
ENSG00000198805	232.719	1.12417	0.399458	2.81423	0.00488935	0.0377444	PNP	Enriched
ENSG00000188167	86.5173	1.12404	0.643146	1.74772	0.0805122	0.205393	TMPPE	Not Significant
ENSG00000200913	27.8851	1.1235	0.627929	1.78922	0.0735797	0.194826	SNORD46	Not Significant
ENSG00000128159	103.723	1.12227	0.491659	2.28262	0.0224529	0.0929767	TUBGCP6	Not Significant
ENSG00000009950	60.0056	1.12193	0.499991	2.2439	0.0248389	0.0991926	MLXIPL	Not Significant
ENSG00000171298	75.0519	1.121	0.589326	1.90217	0.0571493	0.16547	GAA	Not Significant
ENSG00000172366	120.131	1.12086	0.587015	1.90942	0.0562083	0.163636	MCRIP2	Not Significant
ENSG00000100225	414.287	1.12049	0.472317	2.37232	0.0176768	0.0797481	FBXO7	Not Significant
ENSG00000176946	244.594	1.12004	0.420155	2.66577	0.00768114	0.0489824	THAP4	Enriched
ENSG00000174851	71.6168	1.1197	0.492597	2.27305	0.0230233	0.0944188	YIF1A	Not Significant
ENSG00000198598	45.4039	1.11945	0.631889	1.77159	0.076462	0.198573	MMP17	Not Significant
ENSG00000176845	93.6493	1.11938	0.571062	1.96017	0.0499765	0.152317	METRNL	Not Significant
ENSG00000140848	101.881	1.11932	0.434758	2.57457	0.0100364	0.0566764	CPNE2	Not Significant
ENSG00000072135	237.717	1.11918	0.416252	2.68871	0.00717288	0.0471681	PTPN18	Enriched
ENSG00000165272	102.217	1.119	0.516431	2.1668	0.0302504	0.110887	AQP3	Not Significant
ENSG00000110171	13.6032	1.11885	0.679578	1.64638	0.0996849	NA	TRIM3	Not Significant
ENSG00000130717	87.3426	1.11799	0.461257	2.42378	0.0153599	0.0734623	UCK1	Not Significant
ENSG00000113504	51.8089	1.11765	0.477798	2.33916	0.0193272	0.0844081	SLC12A7	Not Significant
ENSG00000080603	71.2772	1.11733	0.466745	2.39387	0.0166717	0.0771117	SRCAP	Not Significant
ENSG00000142453	197.881	1.11667	0.483916	2.30758	0.0210225	0.0893212	CARM1	Not Significant
ENSG00000166987	130.128	1.11653	0.573965	1.94529	0.0517399	0.155263	MBD6	Not Significant
ENSG00000239306	238.576	1.11646	0.445611	2.50545	0.0122295	0.0642291	RBM14	Not Significant
ENSG00000197157	1525.14	1.11541	0.361821	3.08276	0.00205093	0.0219905	SND1	Enriched
ENSG00000175764	34.8618	1.11507	0.524315	2.12671	0.0334442	0.118072	TTLL11	Not Significant
ENSG00000181038	28.1856	1.11409	0.60529	1.84058	0.0656826	0.180681	METTL23	Not Significant
ENSG00000147799	42.7234	1.11376	0.648721	1.71686	0.086005	0.21466	ARHGAP39	Not Significant
ENSG00000139266	50.3556	1.11362	0.533779	2.0863	0.0369514	0.125446	MARCHF9	Not Significant
ENSG00000099999	8.60466	1.11324	0.842913	1.32071	0.186599	NA	RNF215	Not Significant
ENSG00000120053	185.955	1.11316	0.430218	2.58742	0.00966972	0.0552368	GOT1	Not Significant
ENSG00000133027	13.834	1.11259	0.814319	1.36629	0.171849	NA	PEMT	Not Significant
ENSG00000111424	54.2208	1.11199	0.521187	2.13358	0.0328773	0.117127	VDR	Not Significant
ENSG00000117643	10.4873	1.11192	0.906929	1.22603	0.220187	NA	MAN1C1	Not Significant
ENSG00000178950	369.101	1.11168	0.416471	2.66928	0.00760134	0.0486149	GAK	Enriched
ENSG00000104529	265.028	1.11148	0.460743	2.41236	0.0158494	0.0748593	EEF1D	Not Significant
ENSG00000129472	36.2245	1.11142	0.580361	1.91505	0.0554867	0.162357	RAB2B	Not Significant
ENSG00000088826	131.403	1.11097	0.657968	1.68849	0.0913182	0.222673	SMOX	Not Significant
ENSG00000127554	40.7345	1.11061	0.600862	1.84836	0.06455	0.178603	GFER	Not Significant
ENSG00000140368	12.6216	1.10987	0.802417	1.38316	0.166615	NA	PSTPIP1	Not Significant
ENSG00000126107	292.735	1.10947	0.391393	2.83467	0.00458733	0.036383	HECTD3	Enriched
ENSG00000101444	558.785	1.10934	0.43184	2.56887	0.0102032	0.0572108	AHCY	Not Significant
ENSG00000169733	53.3528	1.10917	0.617448	1.79637	0.0724353	0.192821	RFNG	Not Significant
ENSG00000140320	263.008	1.10886	0.423104	2.62079	0.00877273	0.0524927	BAHD1	Not Significant
ENSG00000134508	20.5764	1.10886	0.700688	1.58253	0.11353	0.254086	CABLES1	Not Significant
ENSG00000112561	45.9703	1.10878	0.646108	1.71609	0.0861461	0.214816	TFEB	Not Significant
ENSG00000214078	122.928	1.10812	0.501125	2.21126	0.0270179	0.103875	CPNE1	Not Significant
ENSG00000168765	60.61	1.10763	0.567596	1.95145	0.0510037	0.154212	GSTM4	Not Significant
ENSG00000106605	148.447	1.10762	0.401404	2.75937	0.00579128	0.041959	BLVRA	Enriched
ENSG00000284753	18.7528	1.10734	0.700421	1.58097	0.113886	0.25452	EEF1AKMT4	Not Significant
ENSG00000100994	131.778	1.10733	0.439794	2.51783	0.011808	0.0627256	PYGB	Not Significant
ENSG00000110651	355.375	1.10687	0.514554	2.15113	0.0314656	0.113888	CD81	Not Significant
ENSG00000103966	93.7656	1.10594	0.457927	2.41509	0.0157312	0.0745227	EHD4	Not Significant
ENSG00000160410	173.76	1.10578	0.460774	2.39984	0.0164024	0.0764145	SHKBP1	Not Significant
ENSG00000174669	133.469	1.10565	0.586685	1.88457	0.0594881	0.168709	SLC29A2	Not Significant
ENSG00000160113	111.6	1.10553	0.509444	2.17007	0.0300014	0.110546	NR2F6	Not Significant
ENSG00000148343	78.7716	1.10457	0.522835	2.11266	0.0346297	0.12055	MIGA2	Not Significant
ENSG00000102858	186.643	1.10444	0.526858	2.09629	0.0360568	0.123598	MGRN1	Not Significant
ENSG00000132153	482.87	1.10421	0.387045	2.85292	0.00433196	0.0354151	DHX30	Enriched
ENSG00000162889	685.323	1.10417	0.42628	2.59025	0.00959052	0.0550426	MAPKAPK2	Not Significant
ENSG00000112658	350.411	1.10355	0.440284	2.50645	0.0121949	0.0641152	SRF	Not Significant
ENSG00000160285	241.26	1.10353	0.434586	2.53927	0.0111086	0.0601641	LSS	Not Significant
ENSG00000168758	319.151	1.10304	0.530682	2.07853	0.0376603	0.126972	SEMA4C	Not Significant
ENSG00000170619	53.9855	1.10298	0.477175	2.31147	0.0208068	0.0887144	COMMD5	Not Significant
ENSG00000100345	3027.11	1.10286	0.508896	2.16717	0.0302217	0.110877	MYH9	Not Significant
ENSG00000184557	122.663	1.10261	0.7124	1.54773	0.121686	0.263934	SOCS3	Not Significant
ENSG00000214160	196.1	1.10199	0.563924	1.95414	0.0506848	0.153531	ALG3	Not Significant
ENSG00000008838	339.78	1.1018	0.442093	2.49225	0.0126938	0.0655129	MED24	Not Significant
ENSG00000137218	14.9126	1.10157	0.70317	1.56658	0.117213	0.258114	FRS3	Not Significant
ENSG00000187605	770.363	1.1015	0.397703	2.76966	0.0056115	0.041091	TET3	Enriched
ENSG00000178209	1105.57	1.1015	0.543835	2.02543	0.0428231	0.13829	PLEC	Not Significant
ENSG00000198894	69.953	1.10045	0.45968	2.39395	0.0166681	0.0771117	CIPC	Not Significant
ENSG00000008382	20.1823	1.10043	0.606423	1.81463	0.0695815	0.188055	MPND	Not Significant
ENSG00000144655	90.8571	1.09942	0.528862	2.07884	0.0376324	0.126931	CSRNP1	Not Significant
ENSG00000168071	77.9479	1.09907	0.64348	1.70801	0.0876336	0.216555	CCDC88B	Not Significant
ENSG00000212232	61.8129	1.09886	0.538375	2.04107	0.0412441	0.1348	SNORD17	Not Significant
ENSG00000141905	435.666	1.09837	0.482794	2.27503	0.0229038	0.0943485	NFIC	Not Significant
ENSG00000105649	12.7015	1.09816	0.731378	1.50149	0.133228	NA	RAB3A	Not Significant
ENSG00000107833	99.0655	1.09801	0.512596	2.14205	0.0321894	0.115768	NPM3	Not Significant
ENSG00000237452	8.05132	1.09788	0.870994	1.2605	0.207491	NA	MEIOSIN	Not Significant
ENSG00000090924	159.229	1.09776	0.477821	2.29742	0.021595	0.0909778	PLEKHG2	Not Significant
ENSG00000124074	34.4122	1.0977	0.538966	2.03667	0.0416829	0.135697	ENKD1	Not Significant
ENSG00000149743	23.4349	1.0967	0.59539	1.84199	0.0654768	0.180338	TRPT1	Not Significant
ENSG00000100075	535.658	1.09666	0.469205	2.33726	0.0194255	0.0847027	SLC25A1	Not Significant
ENSG00000215305	73.9142	1.09636	0.444558	2.46619	0.0136561	0.0685209	VPS16	Not Significant
ENSG00000105722	226.141	1.09608	0.56918	1.92571	0.0541406	0.159941	ERF	Not Significant
ENSG00000100150	41.7081	1.09588	0.494191	2.21753	0.0265871	0.103059	DEPDC5	Not Significant
ENSG00000072310	270.36	1.0953	0.49065	2.23234	0.0255925	0.101	SREBF1	Not Significant
ENSG00000214391	13.0559	1.09467	0.734133	1.4911	0.135934	NA	TUBAP2	Not Significant
ENSG00000142634	336.807	1.09452	0.532681	2.05474	0.0399038	0.131948	EFHD2	Not Significant
ENSG00000224577	14.377	1.09437	0.719134	1.52179	0.128062	0.27285	LINC01117	Not Significant
ENSG00000080845	125.299	1.09435	0.50464	2.16857	0.0301153	0.110715	DLGAP4	Not Significant
ENSG00000165801	29.4031	1.09432	0.613562	1.78355	0.0744969	0.196029	ARHGEF40	Not Significant
ENSG00000164713	51.7729	1.09427	0.535159	2.04476	0.0408789	0.134126	BRI3	Not Significant
ENSG00000077044	369.104	1.09404	0.419691	2.60678	0.00913971	0.0535612	DGKD	Not Significant
ENSG00000167535	16.6	1.09325	0.654092	1.6714	0.0946421	0.227515	CACNB3	Not Significant
ENSG00000185885	176.171	1.093	0.419049	2.60829	0.00909958	0.0534639	IFITM1	Not Significant
ENSG00000127616	1111.06	1.09295	0.440241	2.48261	0.0130424	0.0663745	SMARCA4	Not Significant
ENSG00000087077	272.917	1.09264	0.509585	2.14419	0.032018	0.11532	TRIP6	Not Significant
ENSG00000110080	49.8841	1.09203	0.50222	2.17441	0.0296741	0.109783	ST3GAL4	Not Significant
ENSG00000159753	9.91647	1.09185	0.787096	1.38719	0.165385	NA	CARMIL2	Not Significant
ENSG00000114767	185.535	1.09169	0.562388	1.94118	0.0522367	0.156325	RRP9	Not Significant
ENSG00000179091	461.273	1.09152	0.425009	2.56822	0.0102222	0.0572742	CYC1	Not Significant
ENSG00000116871	412.879	1.0912	0.457604	2.38459	0.0170984	0.0785063	MAP7D1	Not Significant
ENSG00000130522	268.887	1.09072	0.564867	1.93094	0.0534906	0.158648	JUND	Not Significant
ENSG00000121671	101.17	1.09072	0.46429	2.34921	0.0188133	0.0830908	CRY2	Not Significant
ENSG00000013583	25.139	1.09067	0.619514	1.76052	0.0783199	0.20182	HEBP1	Not Significant
ENSG00000116649	736.988	1.0905	0.563735	1.93442	0.0530619	0.157975	SRM	Not Significant
ENSG00000146112	239.704	1.08927	0.484572	2.24791	0.0245822	0.0985267	PPP1R18	Not Significant
ENSG00000126882	466.855	1.08927	0.406069	2.68247	0.00730802	0.0476281	FAM78A	Enriched
ENSG00000136286	259.3	1.08837	0.507043	2.1465	0.0318335	0.114885	MYO1G	Not Significant
ENSG00000049656	509.95	1.08815	0.468462	2.32281	0.0201893	0.0869852	CLPTM1L	Not Significant
ENSG00000100418	203.684	1.08776	0.519094	2.09549	0.0361274	0.123717	DESI1	Not Significant
ENSG00000153976	26.3834	1.08749	0.695269	1.56413	0.117786	0.258797	HS3ST3A1	Not Significant
ENSG00000126746	141.646	1.08727	0.410003	2.65185	0.00800522	0.0498322	ZNF384	Enriched
ENSG00000130725	317.608	1.08698	0.468278	2.32122	0.020275	0.0872614	UBE2M	Not Significant
ENSG00000196843	60.4556	1.08692	0.553209	1.96475	0.0494432	0.151243	ARID5A	Not Significant
ENSG00000178773	81.7954	1.08688	0.522405	2.08054	0.0374764	0.126522	CPNE7	Not Significant
ENSG00000196155	144.541	1.08593	0.432539	2.5106	0.0120526	0.0636723	PLEKHG4	Not Significant
ENSG00000232112	9.81857	1.08524	0.760013	1.42793	0.153312	NA	TMA7	Not Significant
ENSG00000184967	133.749	1.08396	0.608293	1.78197	0.074754	0.196276	NOC4L	Not Significant
ENSG00000115694	195.87	1.08387	0.440348	2.46139	0.0138399	0.069212	STK25	Not Significant
ENSG00000070047	534.203	1.08383	0.443715	2.44262	0.0145813	0.0714673	PHRF1	Not Significant
ENSG00000132182	1607	1.08377	0.417143	2.59808	0.00937479	0.0543163	NUP210	Not Significant
ENSG00000144043	271.647	1.08298	0.571998	1.89333	0.0583141	0.166947	TEX261	Not Significant
ENSG00000204287	83.709	1.08286	0.444168	2.43794	0.0147711	0.071996	HLA-DRA	Not Significant
ENSG00000137094	11.6256	1.08246	0.730076	1.48266	0.138164	NA	DNAJB5	Not Significant
ENSG00000013306	598.079	1.08207	0.469224	2.30608	0.0211063	0.0895729	SLC25A39	Not Significant
ENSG00000168936	108.75	1.08197	0.480219	2.25307	0.0242544	0.097713	TMEM129	Not Significant
ENSG00000198546	32.8621	1.08122	0.624826	1.73043	0.0835541	0.210218	ZNF511	Not Significant
ENSG00000104983	19.1706	1.08105	0.653173	1.65507	0.0979103	0.232365	CCDC61	Not Significant
ENSG00000054967	60.5303	1.08062	0.529789	2.03971	0.0413789	0.135039	RELT	Not Significant
ENSG00000166188	42.5969	1.08043	0.557594	1.93766	0.0526643	0.157156	ZNF319	Not Significant
ENSG00000103005	219.496	1.07914	0.539801	1.99915	0.0455922	0.14358	USB1	Not Significant
ENSG00000103066	33.8583	1.07905	0.586509	1.83978	0.0658001	0.180828	PLA2G15	Not Significant
ENSG00000133884	309.569	1.07846	0.401411	2.68667	0.00721681	0.047315	DPF2	Enriched
ENSG00000130158	53.5123	1.07755	0.470109	2.29213	0.021898	0.0917956	DOCK6	Not Significant
ENSG00000125449	51.3959	1.07713	0.538416	2.00056	0.04544	0.143342	ARMC7	Not Significant
ENSG00000162302	109.564	1.0763	0.531255	2.02596	0.0427685	0.138257	RPS6KA4	Not Significant
ENSG00000007047	146.425	1.07626	0.471478	2.28274	0.0224459	0.0929767	MARK4	Not Significant
ENSG00000015285	44.2952	1.07581	0.540665	1.98979	0.0466139	0.145537	WAS	Not Significant
ENSG00000149499	183.895	1.07571	0.455656	2.3608	0.0182354	0.0815903	EML3	Not Significant
ENSG00000170190	11.6974	1.0757	0.737229	1.45911	0.144534	NA	SLC16A5	Not Significant
ENSG00000179820	273.208	1.07545	0.579557	1.85564	0.063505	0.176596	MYADM	Not Significant
ENSG00000162227	26.3783	1.07521	0.654933	1.64171	0.10065	0.236563	TAF6L	Not Significant
ENSG00000119574	35.1565	1.07423	0.576582	1.86311	0.0624474	0.174674	ZBTB45	Not Significant
ENSG00000100387	69.5311	1.07402	0.630243	1.70414	0.0883551	0.217974	RBX1	Not Significant
ENSG00000100092	30.4699	1.07401	0.64279	1.67086	0.0947502	0.227628	SH3BP1	Not Significant
ENSG00000049246	104.576	1.07369	0.48794	2.20045	0.027775	0.105541	PER3	Not Significant
ENSG00000188493	56.9333	1.07355	0.537136	1.99865	0.0456466	0.14358	ACTMAP	Not Significant
ENSG00000110047	215.882	1.07341	0.502822	2.13478	0.0327792	0.11693	EHD1	Not Significant
ENSG00000140995	167.643	1.07299	0.460169	2.33172	0.0197152	0.0853883	DEF8	Not Significant
ENSG00000105438	215.638	1.07274	0.544152	1.9714	0.0486784	0.149828	KDELR1	Not Significant
ENSG00000175573	55.6693	1.07265	0.577601	1.85708	0.0633001	0.176205	C11orf68	Not Significant
ENSG00000177954	1300.44	1.07255	0.450941	2.37848	0.0173843	0.0792153	RPS27	Not Significant
ENSG00000157837	74.0499	1.07181	0.542035	1.97738	0.0479988	0.148366	SPPL3	Not Significant
ENSG00000136240	233.501	1.07159	0.514999	2.08077	0.0374551	0.126489	KDELR2	Not Significant
ENSG00000010803	295.802	1.07087	0.401948	2.66421	0.00771701	0.0490627	SCMH1	Enriched
ENSG00000189306	177.437	1.07064	0.505194	2.11927	0.0340673	0.119212	RRP7A	Not Significant
ENSG00000135446	303.479	1.07044	0.471126	2.27208	0.0230815	0.0945866	CDK4	Not Significant
ENSG00000106003	9.0728	1.07022	0.902188	1.18624	0.235526	NA	LFNG	Not Significant
ENSG00000135390	453.766	1.0699	0.506246	2.11341	0.0345661	0.120366	ATP5MC2	Not Significant
ENSG00000146826	52.433	1.06938	0.547243	1.95412	0.0506869	0.153531	TRAPPC14	Not Significant
ENSG00000067836	10.5682	1.06898	0.771002	1.38648	0.165599	NA	ROGDI	Not Significant
ENSG00000100055	44.5628	1.06832	0.63022	1.69515	0.090047	0.220679	CYTH4	Not Significant
ENSG00000197061	380.118	1.06827	0.498229	2.14413	0.0320224	0.11532	H4C3	Not Significant
ENSG00000110881	11.3582	1.06808	0.729983	1.46315	0.143425	NA	ASIC1	Not Significant
ENSG00000183087	71.1207	1.06744	0.530188	2.01332	0.0440811	0.14088	GAS6	Not Significant
ENSG00000145050	92.0436	1.06701	0.503254	2.12022	0.0339873	0.119108	MANF	Not Significant
ENSG00000128626	118.113	1.06632	0.622644	1.71256	0.0867934	0.215572	MRPS12	Not Significant
ENSG00000101152	712.483	1.06574	0.420417	2.53496	0.011246	0.0606982	DNAJC5	Not Significant
ENSG00000162650	30.0192	1.065	0.661856	1.60912	0.107591	0.245866	ATXN7L2	Not Significant
ENSG00000196476	22.9221	1.06459	0.609686	1.74612	0.0807901	0.205719	C20orf96	Not Significant
ENSG00000100605	177.442	1.06442	0.474011	2.24555	0.0247327	0.098985	ITPK1	Not Significant
ENSG00000070423	138.362	1.0644	0.559889	1.9011	0.0572895	0.165629	RNF126	Not Significant
ENSG00000065029	73.7341	1.0644	0.496991	2.14168	0.0322194	0.115788	ZNF76	Not Significant
ENSG00000128604	10.5247	1.06236	0.818639	1.29772	0.194383	NA	IRF5	Not Significant
ENSG00000141101	208.84	1.06215	0.385001	2.75883	0.0058008	0.0419854	NOB1	Enriched
ENSG00000138834	114.911	1.06183	0.556409	1.90836	0.0563451	0.163878	MAPK8IP3	Not Significant
ENSG00000162522	387.726	1.06161	0.461311	2.30129	0.0213753	0.0903997	NHSL3	Not Significant
ENSG00000130312	71.9503	1.06149	0.585456	1.8131	0.0698159	0.188456	MRPL34	Not Significant
ENSG00000139182	62.7389	1.06116	0.487378	2.17729	0.0294588	0.109282	CLSTN3	Not Significant
ENSG00000088247	1604.73	1.06104	0.412023	2.57519	0.0100185	0.0566764	KHSRP	Not Significant
ENSG00000198756	130.361	1.06099	0.434426	2.44229	0.0145945	0.0714856	COLGALT2	Not Significant
ENSG00000198736	85.7246	1.06009	0.546029	1.94146	0.0522027	0.156266	MSRB1	Not Significant
ENSG00000258366	11.1486	1.05996	0.733426	1.44522	0.148396	NA	RTEL1	Not Significant
ENSG00000278619	66.8394	1.05955	0.571518	1.85392	0.0637509	0.17701	MRM1	Not Significant
ENSG00000182117	136.627	1.05933	0.545206	1.943	0.0520165	0.15583	NOP10	Not Significant
ENSG00000127054	494.488	1.059	0.444342	2.3833	0.0171582	0.0786207	INTS11	Not Significant
ENSG00000277157	292.021	1.05878	0.462263	2.29043	0.0219964	0.0920321	H4C4	Not Significant
ENSG00000178252	316.986	1.05855	0.435663	2.42975	0.015109	0.0728862	WDR6	Not Significant
ENSG00000106009	135.159	1.05847	0.579435	1.82673	0.0677406	0.18449	BRAT1	Not Significant
ENSG00000162062	73.9379	1.05845	0.640773	1.65184	0.0985681	0.23337	TEDC2	Not Significant
ENSG00000196230	2620.74	1.05811	0.478318	2.21214	0.0269571	0.103722	TUBB	Not Significant
ENSG00000008513	127.707	1.05807	0.4541	2.33004	0.0198043	0.0856726	ST3GAL1	Not Significant
ENSG00000110583	137.664	1.05794	0.436028	2.4263	0.0152535	0.0731559	NAA40	Not Significant
ENSG00000186654	25.3776	1.05782	0.658395	1.60667	0.108127	0.24666	PRR5	Not Significant
ENSG00000244038	711.164	1.0577	0.436209	2.42476	0.0153185	0.0733282	DDOST	Not Significant
ENSG00000038358	418.897	1.05766	0.38195	2.76912	0.00562087	0.0411321	EDC4	Enriched
ENSG00000164236	125.422	1.05756	0.422898	2.50074	0.0123934	0.0644787	ANKRD33B	Not Significant
ENSG00000262919	58.4779	1.05737	0.506767	2.0865	0.0369331	0.125446	CCNQ	Not Significant
ENSG00000109107	358.062	1.05728	0.439399	2.4062	0.0161196	0.075514	ALDOC	Not Significant
ENSG00000181649	32.7305	1.05722	0.608524	1.73735	0.0823255	0.208419	PHLDA2	Not Significant
ENSG00000204592	299.038	1.05667	0.526996	2.00507	0.0449552	0.142181	HLA-E	Not Significant
ENSG00000206503	218.025	1.05649	0.540102	1.9561	0.0504536	0.153291	HLA-A	Not Significant
ENSG00000131653	475.365	1.05612	0.389498	2.71148	0.00669828	0.0453542	TRAF7	Enriched
ENSG00000169598	30.7869	1.05584	0.548297	1.92567	0.0541455	0.159941	DFFB	Not Significant
ENSG00000198373	259.213	1.05499	0.391366	2.69566	0.00702484	0.0465784	WWP2	Enriched
ENSG00000108479	48.2614	1.05495	0.508861	2.07316	0.0381571	0.128227	GALK1	Not Significant
ENSG00000101336	47.9617	1.05439	0.573146	1.83966	0.0658185	0.180828	HCK	Not Significant
ENSG00000163900	114.874	1.05384	0.523968	2.01127	0.0442971	0.141176	TMEM41A	Not Significant
ENSG00000123992	141.605	1.05329	0.494408	2.13041	0.033138	0.117484	DNPEP	Not Significant
ENSG00000205208	44.2316	1.0527	0.576835	1.82496	0.0680072	0.184899	C4orf46	Not Significant
ENSG00000099308	93.0419	1.05232	0.494769	2.12689	0.0334295	0.118072	MAST3	Not Significant
ENSG00000227473	20.2279	1.0523	0.714803	1.47215	0.140981	0.288137	TSSK5P	Not Significant
ENSG00000173163	24.3409	1.05225	0.610386	1.72391	0.0847237	0.212332	COMMD1	Not Significant
ENSG00000006282	14.1217	1.05219	0.685414	1.53512	0.124755	NA	SPATA20	Not Significant
ENSG00000100239	189.965	1.05135	0.419355	2.50706	0.0121741	0.0640366	PPP6R2	Not Significant
ENSG00000118705	948.109	1.05119	0.418281	2.51313	0.0119667	0.0632912	RPN2	Not Significant
ENSG00000204351	187.601	1.05068	0.434708	2.41698	0.0156497	0.0742972	SKIC2	Not Significant
ENSG00000158552	38.0884	1.05058	0.625478	1.67964	0.0930277	0.22542	ZFAND2B	Not Significant
ENSG00000167513	502.165	1.05027	0.491372	2.13741	0.0325645	0.116429	CDT1	Not Significant
ENSG00000100241	746.072	1.05024	0.480422	2.18607	0.0288102	0.107692	SBF1	Not Significant
ENSG00000197153	199.244	1.05006	0.491771	2.13526	0.0327398	0.11693	H3C12	Not Significant
ENSG00000204946	80.4901	1.04958	0.528426	1.98625	0.047006	0.146421	ZNF783	Not Significant
ENSG00000060491	303.821	1.04942	0.522943	2.00675	0.044776	0.141778	OGFR	Not Significant
ENSG00000105281	522.199	1.0494	0.522503	2.00842	0.0445987	0.141445	SLC1A5	Not Significant
ENSG00000176788	83.6481	1.04853	0.507576	2.06575	0.0388521	0.129905	BASP1	Not Significant
ENSG00000274274	9.29879	1.04833	0.897305	1.16831	0.242683	NA	GAGE13	Not Significant
ENSG00000105364	165.427	1.04828	0.504358	2.07845	0.0376678	0.126972	MRPL4	Not Significant
ENSG00000197632	13.8734	1.04785	0.967781	1.08273	0.278927	NA	SERPINB2	Not Significant
ENSG00000119777	249.646	1.04751	0.460638	2.27404	0.0229637	0.0943896	TMEM214	Not Significant
ENSG00000135469	17.1773	1.04721	0.650148	1.61073	0.107238	0.245571	COQ10A	Not Significant
ENSG00000133612	457.95	1.04716	0.470271	2.22671	0.0259667	0.101886	AGAP3	Not Significant
ENSG00000293510	31.7272	1.04705	0.556491	1.88152	0.0599009	0.169342	AFG3L1P	Not Significant
ENSG00000023191	350.456	1.04704	0.50714	2.06459	0.0389615	0.1301	RNH1	Not Significant
ENSG00000105011	148.903	1.04688	0.449216	2.33045	0.0197823	0.0856114	ASF1B	Not Significant
ENSG00000141582	163.123	1.04662	0.512951	2.04039	0.0413119	0.13486	CBX4	Not Significant
ENSG00000213859	10.486	1.04581	0.732131	1.42845	0.153162	NA	KCTD11	Not Significant
ENSG00000130714	51.3195	1.0457	0.504975	2.07079	0.0383781	0.128618	POMT1	Not Significant
ENSG00000163154	20.8929	1.04392	0.649566	1.6071	0.108033	0.246515	TNFAIP8L2	Not Significant
ENSG00000100243	148.986	1.04371	0.439954	2.3723	0.0176775	0.0797481	CYB5R3	Not Significant
ENSG00000032389	89.8014	1.04337	0.428675	2.43395	0.0149352	0.0722822	EIPR1	Not Significant
ENSG00000112659	116.169	1.04257	0.446605	2.33443	0.019573	0.0850426	CUL9	Not Significant
ENSG00000179862	43.1711	1.04239	0.588135	1.77236	0.0763341	0.198309	CITED4	Not Significant
ENSG00000083444	348.279	1.04235	0.46831	2.22577	0.0260298	0.102012	PLOD1	Not Significant
ENSG00000060642	38.1256	1.04106	0.542215	1.92002	0.0548556	0.16117	PIGV	Not Significant
ENSG00000129562	114.387	1.04104	0.567636	1.83399	0.0666558	0.182459	DAD1	Not Significant
ENSG00000158717	104.835	1.04026	0.52083	1.99731	0.0457911	0.143901	RNF166	Not Significant
ENSG00000096070	373.119	1.03942	0.417179	2.49154	0.0127192	0.0655793	BRPF3	Not Significant
ENSG00000044090	99.1524	1.03905	0.454368	2.28681	0.0222071	0.0924182	CUL7	Not Significant
ENSG00000156795	32.132	1.03856	0.546842	1.89919	0.0575393	0.16568	NTAQ1	Not Significant
ENSG00000158869	55.0001	1.0385	0.633637	1.63894	0.101225	0.237614	FCER1G	Not Significant
ENSG00000105671	201.156	1.03821	0.522972	1.98522	0.0471202	0.146557	DDX49	Not Significant
ENSG00000100889	123.571	1.03795	0.438257	2.36836	0.0178669	0.0803022	PCK2	Not Significant
ENSG00000173917	60.2496	1.03779	0.579344	1.79131	0.0732428	0.194404	HOXB2	Not Significant
ENSG00000159111	174.794	1.03774	0.418211	2.48137	0.0130878	0.0665429	MRPL10	Not Significant
ENSG00000167106	58.9325	1.03765	0.63578	1.63209	0.102661	0.239594	EEIG1	Not Significant
ENSG00000008130	289.606	1.03757	0.460955	2.25092	0.0243905	0.098117	NADK	Not Significant
ENSG00000196954	35.429	1.03751	0.529622	1.95895	0.0501182	0.152633	CASP4	Not Significant
ENSG00000012779	15.2062	1.03746	0.823985	1.25908	0.208003	0.36937	ALOX5	Not Significant
ENSG00000197283	80.1095	1.03732	0.473802	2.18936	0.0285707	0.107221	SYNGAP1	Not Significant
ENSG00000101940	108.478	1.03632	0.480326	2.15754	0.030964	0.112663	WDR13	Not Significant
ENSG00000184922	83.9206	1.03628	0.497496	2.083	0.0372511	0.12618	FMNL1	Not Significant
ENSG00000154803	84.6737	1.03624	0.439424	2.35818	0.018365	0.081903	FLCN	Not Significant
ENSG00000160688	139.627	1.03529	0.54112	1.91324	0.0557171	0.162612	FLAD1	Not Significant
ENSG00000163472	38.2106	1.03497	0.595691	1.73743	0.0823104	0.208419	TMEM79	Not Significant
ENSG00000183207	603.966	1.03475	0.435903	2.37382	0.0176053	0.0795879	RUVBL2	Not Significant
ENSG00000100413	85.752	1.03429	0.473241	2.18555	0.0288488	0.107748	POLR3H	Not Significant
ENSG00000169100	896.063	1.0342	0.443032	2.33437	0.0195761	0.0850426	SLC25A6	Not Significant
ENSG00000104221	29.5238	1.03393	0.535594	1.93044	0.0535524	0.158789	BRF2	Not Significant
ENSG00000091542	355.651	1.03388	0.454753	2.2735	0.0229962	0.0943896	ALKBH5	Not Significant
ENSG00000111671	22.9895	1.03328	0.661132	1.5629	0.118076	0.259078	SPSB2	Not Significant
ENSG00000118162	13.9044	1.0326	0.715326	1.44353	0.14887	NA	KPTN	Not Significant
ENSG00000085998	184.292	1.03249	0.470922	2.19248	0.028345	0.106629	POMGNT1	Not Significant
ENSG00000162736	256.205	1.03239	0.435071	2.37293	0.0176477	0.0797093	NCSTN	Not Significant
ENSG00000011422	92.9546	1.03223	0.514302	2.00705	0.0447447	0.141761	PLAUR	Not Significant
ENSG00000128228	281.285	1.0315	0.559107	1.84491	0.065051	0.179665	SDF2L1	Not Significant
ENSG00000150782	13.7627	1.03129	0.719957	1.43243	0.152021	NA	IL18	Not Significant
ENSG00000111725	213.933	1.03099	0.510009	2.02152	0.0432264	0.139031	PRKAB1	Not Significant
ENSG00000204564	78.7131	1.03097	0.620074	1.66266	0.0963806	0.230335	C6orf136	Not Significant
ENSG00000234912	24.0636	1.03078	0.601161	1.71465	0.0864097	0.215083	SNHG20	Not Significant
ENSG00000106479	13.3524	1.03063	0.715295	1.44084	0.14963	NA	ZNF862	Not Significant
ENSG00000063660	13.5341	1.03042	0.722368	1.42645	0.153738	NA	GPC1	Not Significant
ENSG00000134461	27.7669	1.03035	0.568819	1.81139	0.07008	0.188876	ANKRD16	Not Significant
ENSG00000130827	150.39	1.03035	0.572732	1.79901	0.0720166	0.192049	PLXNA3	Not Significant
ENSG00000119383	350.549	1.03011	0.451402	2.28202	0.0224879	0.0929884	PTPA	Not Significant
ENSG00000166311	34.7684	1.02963	0.71426	1.44153	0.149435	0.299417	SMPD1	Not Significant
ENSG00000124217	33.9432	1.02958	0.531285	1.9379	0.052635	0.157156	MOCS3	Not Significant
ENSG00000171067	121.041	1.02948	0.481477	2.13817	0.0325027	0.116278	C11orf24	Not Significant
ENSG00000143851	357.853	1.02946	0.449049	2.29252	0.0218754	0.0917915	PTPN7	Not Significant
ENSG00000109084	151.331	1.02941	0.535148	1.92361	0.0544039	0.160213	TMEM97	Not Significant
ENSG00000126500	12.1437	1.0292	0.783638	1.31337	0.18906	NA	FLRT1	Not Significant
ENSG00000090565	82.6281	1.02886	0.576004	1.7862	0.0740663	0.195454	RAB11FIP3	Not Significant
ENSG00000283041	240.611	1.02837	0.408844	2.5153	0.011893	0.0630115	LOC729998	Not Significant
ENSG00000126457	450.088	1.02817	0.443886	2.31631	0.0205416	0.087994	PRMT1	Not Significant
ENSG00000162542	18.566	1.02781	0.702394	1.4633	0.143385	0.290803	TMCO4	Not Significant
ENSG00000176473	18.7051	1.02777	0.600482	1.71157	0.0869757	0.215626	WDR25	Not Significant
ENSG00000159314	57.8675	1.02708	0.57806	1.77677	0.0756066	0.197239	ARHGAP27	Not Significant
ENSG00000136933	106.93	1.02705	0.469722	2.1865	0.0287793	0.107635	RABEPK	Not Significant
ENSG00000172890	123.636	1.02659	0.423096	2.42638	0.0152504	0.0731559	NADSYN1	Not Significant
ENSG00000101307	49.033	1.02569	0.586596	1.74855	0.0803686	0.205266	SIRPB1	Not Significant
ENSG00000039650	64.0377	1.02534	0.525373	1.95165	0.05098	0.154206	PNKP	Not Significant
ENSG00000181788	107.4	1.02532	0.510368	2.00899	0.0445379	0.141445	SIAH2	Not Significant
ENSG00000074842	188.232	1.02468	0.502144	2.0406	0.0412901	0.13486	MYDGF	Not Significant
ENSG00000117450	529.236	1.02463	0.507187	2.02022	0.0433601	0.139184	PRDX1	Not Significant
ENSG00000177352	57.5112	1.0245	0.466605	2.19565	0.0281173	0.10612	CCDC71	Not Significant
ENSG00000075618	1058.93	1.02447	0.486174	2.1072	0.0350998	0.12165	FSCN1	Not Significant
ENSG00000092929	656.789	1.02445	0.488501	2.09714	0.0359814	0.1235	UNC13D	Not Significant
ENSG00000166794	158.078	1.02418	0.497659	2.058	0.0395902	0.131074	PPIB	Not Significant
ENSG00000172244	19.6692	1.02376	0.61006	1.67814	0.0933207	0.225724	C5orf34	Not Significant
ENSG00000107331	146.485	1.02374	0.459989	2.22558	0.0260422	0.102012	ABCA2	Not Significant
ENSG00000168256	221.476	1.02365	0.445729	2.29657	0.0216436	0.0911125	NKIRAS2	Not Significant
ENSG00000163348	183.269	1.02357	0.520286	1.96733	0.0491452	0.150609	PYGO2	Not Significant
ENSG00000171853	127.842	1.02326	0.427365	2.39435	0.01665	0.0770913	TRAPPC12	Not Significant
ENSG00000071553	181.356	1.0227	0.521946	1.9594	0.0500655	0.152534	ATP6AP1	Not Significant
ENSG00000189283	11.2638	1.02218	0.730564	1.39916	0.161764	NA	FHIT	Not Significant
ENSG00000100647	113.514	1.02206	0.436375	2.34216	0.0191724	0.0838439	SUSD6	Not Significant
ENSG00000153066	114.637	1.02203	0.441523	2.31478	0.0206248	0.0881347	TXNDC11	Not Significant
ENSG00000105229	73.4538	1.02193	0.558466	1.82989	0.067266	0.183611	PIAS4	Not Significant
ENSG00000214706	128.97	1.02172	0.606176	1.68551	0.0918897	0.223446	IFRD2	Not Significant
ENSG00000135211	24.8417	1.0216	0.571561	1.78739	0.073874	0.195228	TMEM60	Not Significant
ENSG00000131446	497.349	1.01935	0.513665	1.98447	0.0472038	0.14671	MGAT1	Not Significant
ENSG00000137700	79.5662	1.01866	0.453762	2.24492	0.0247735	0.0991123	SLC37A4	Not Significant
ENSG00000169220	109.825	1.01851	0.533928	1.90759	0.0564445	0.16408	RGS14	Not Significant
ENSG00000104969	492.651	1.01797	0.470936	2.16159	0.0306501	0.112108	SGTA	Not Significant
ENSG00000158941	382.195	1.01757	0.417579	2.43683	0.0148166	0.072032	CCAR2	Not Significant
ENSG00000005844	153.863	1.01728	0.411386	2.47281	0.0134056	0.0677509	ITGAL	Not Significant
ENSG00000171045	24.9187	1.01718	0.600174	1.6948	0.0901128	0.220692	TSNARE1	Not Significant
ENSG00000247077	404.003	1.01705	0.546703	1.86034	0.0628374	0.175273	PGAM5	Not Significant
ENSG00000105520	49.5869	1.01696	0.644349	1.57827	0.114503	0.255197	PLPPR2	Not Significant
ENSG00000123395	43.1836	1.0167	0.569334	1.78577	0.0741366	0.195545	ATG101	Not Significant
ENSG00000204160	170.414	1.0165	0.513469	1.97968	0.0477397	0.147831	ZDHHC18	Not Significant
ENSG00000167977	158.239	1.01609	0.520868	1.95077	0.0510844	0.154315	KCTD5	Not Significant
ENSG00000171169	70.2839	1.01578	0.468653	2.16745	0.0302009	0.110877	NAIF1	Not Significant
ENSG00000076984	128.962	1.01568	0.534758	1.89932	0.0575226	0.16568	MAP2K7	Not Significant
ENSG00000196126	47.5151	1.01511	0.498441	2.03658	0.041692	0.135697	HLA-DRB1	Not Significant
ENSG00000162972	43.7384	1.01478	0.50266	2.01882	0.0435055	0.139447	MAIP1	Not Significant
ENSG00000130669	102.421	1.01471	0.492514	2.06027	0.0393723	0.130788	PAK4	Not Significant
ENSG00000204859	87.9467	1.01458	0.492771	2.05892	0.0395017	0.130861	ZBTB48	Not Significant
ENSG00000161956	67.4809	1.01447	0.456069	2.22437	0.0261234	0.102127	SENP3	Not Significant
ENSG00000130159	85.8817	1.01441	0.525187	1.93152	0.0534189	0.158508	ECSIT	Not Significant
ENSG00000185163	118.793	1.01423	0.497434	2.03893	0.0414573	0.135255	DDX51	Not Significant
ENSG00000148400	382.867	1.01402	0.526727	1.92513	0.0542128	0.160054	NOTCH1	Not Significant
ENSG00000067225	3504.6	1.01359	0.378574	2.67738	0.00742008	0.047931	PKM	Enriched
ENSG00000247081	6.26877	1.01349	1.01204	1.00144	0.316616	NA	LOC105369147	Not Significant
ENSG00000100294	47.3859	1.01227	0.572101	1.7694	0.0768279	0.199193	MCAT	Not Significant
ENSG00000197363	19.4902	1.01214	0.729179	1.38806	0.165119	0.318988	ZNF517	Not Significant
ENSG00000204463	1009.09	1.01205	0.439966	2.30029	0.0214317	0.0905682	BAG6	Not Significant
ENSG00000177602	70.6569	1.01151	0.439837	2.29975	0.0214624	0.0905933	HASPIN	Not Significant
ENSG00000104518	22.1177	1.01085	0.68463	1.47649	0.139813	0.286795	GSDMD	Not Significant
ENSG00000204525	271.041	1.01042	0.615097	1.6427	0.100445	0.236275	HLA-C	Not Significant
ENSG00000089060	140.918	1.01024	0.469256	2.15285	0.0313303	0.113572	SLC8B1	Not Significant
ENSG00000167985	16.3862	1.0102	0.700679	1.44175	0.149372	0.299346	SDHAF2	Not Significant
ENSG00000170627	266.694	1.01005	0.499563	2.02186	0.0431907	0.139007	GTSF1	Not Significant
ENSG00000105325	169.246	1.00985	0.487663	2.07079	0.0383788	0.128618	FZR1	Not Significant
ENSG00000100997	68.1529	1.0094	0.513685	1.96502	0.0494114	0.151214	ABHD12	Not Significant
ENSG00000196588	213.989	1.0093	0.42356	2.38289	0.0171772	0.0786207	MRTFA	Not Significant
ENSG00000269609	30.54	1.00893	0.581642	1.73462	0.0828079	0.209157	C10orf95-AS1	Not Significant
ENSG00000176986	564.484	1.00887	0.387054	2.60652	0.00914674	0.0535612	SEC24C	Not Significant
ENSG00000160991	227.363	1.00826	0.565922	1.78163	0.0748098	0.196376	ORAI2	Not Significant
ENSG00000089820	182.303	1.00813	0.572688	1.76035	0.078348	0.201845	ARHGAP4	Not Significant
ENSG00000117594	21.7957	1.0077	0.588211	1.71316	0.0866832	0.215421	HSD11B1	Not Significant
ENSG00000277972	60.0961	1.00766	0.579596	1.73856	0.0821119	0.208263	CISD3	Not Significant
ENSG00000164062	381.815	1.00727	0.39118	2.57496	0.0100251	0.0566764	APEH	Not Significant
ENSG00000004142	440.117	1.00713	0.451404	2.23111	0.0256736	0.101162	POLDIP2	Not Significant
ENSG00000068028	151.691	1.00705	0.481941	2.08957	0.0366563	0.124907	RASSF1	Not Significant
ENSG00000101084	22.8195	1.00648	0.73505	1.36927	0.170915	0.325781	RAB5IF	Not Significant
ENSG00000213638	9.82613	1.00592	0.955541	1.05272	0.292469	NA	ADAT3	Not Significant
ENSG00000172771	10.5491	1.00589	0.728864	1.38007	0.167564	NA	EFCAB12	Not Significant
ENSG00000135439	32.7554	1.00533	0.562218	1.78815	0.0737519	0.195141	AGAP2	Not Significant
ENSG00000117448	169.828	1.005	0.435233	2.30912	0.0209369	0.0891647	AKR1A1	Not Significant
ENSG00000185338	10.6149	1.00433	0.779946	1.2877	0.197851	NA	SOCS1	Not Significant
ENSG00000116809	127.47	1.00426	0.485229	2.06966	0.0384846	0.128933	ZBTB17	Not Significant
ENSG00000072818	22.713	1.00416	0.630683	1.59218	0.111344	0.251103	ACAP1	Not Significant
ENSG00000176170	112.183	1.00402	0.562511	1.78489	0.0742794	0.195827	SPHK1	Not Significant
ENSG00000099849	53.8199	1.00382	0.680185	1.47581	0.139995	0.287061	RASSF7	Not Significant
ENSG00000025770	202.333	1.00359	0.475166	2.11208	0.0346798	0.120628	NCAPH2	Not Significant
ENSG00000103415	138.194	1.00321	0.433728	2.31298	0.0207235	0.0884279	HMOX2	Not Significant
ENSG00000132394	53.1549	1.00255	0.481426	2.08246	0.0373	0.126198	EEFSEC	Not Significant
ENSG00000276410	66.1401	1.00176	0.470085	2.13102	0.0330876	0.117419	H2BC3	Not Significant
ENSG00000128524	228.387	1.00162	0.557908	1.79531	0.072604	0.193176	ATP6V1F	Not Significant
ENSG00000225439	48.0534	1.00136	0.552223	1.81333	0.0697805	0.188446	BOLA3-DT	Not Significant
ENSG00000134287	411.2	1.00106	0.432078	2.31686	0.0205114	0.0879679	ARF3	Not Significant
ENSG00000167536	27.6549	1.00095	0.626141	1.59861	0.109908	0.249052	DHRS13	Not Significant
ENSG00000186193	319.065	1.00069	0.495239	2.02062	0.0433189	0.139174	SAPCD2	Not Significant
ENSG00000174943	40.7163	1.00037	0.644318	1.5526	0.12052	0.262286	KCTD13	Not Significant
ENSG00000010256	532.087	1.00033	0.413698	2.41803	0.0156049	0.0741166	UQCRC1	Not Significant
ENSG00000040487	100.166	1.0003	0.558716	1.79036	0.0733968	0.194531	SLC66A1	Not Significant
ENSG00000275023	361.086	0.999892	0.440699	2.26887	0.0232759	0.0950527	MLLT6	Not Significant
ENSG00000198026	86.267	0.998604	0.453545	2.20178	0.0276812	0.105436	ZNF335	Not Significant
ENSG00000135476	264.365	0.998599	0.402688	2.47983	0.0131443	0.0667384	ESPL1	Not Significant
ENSG00000242516	10.1191	0.998048	0.787226	1.2678	0.204868	NA	LINC00960	Not Significant
ENSG00000204991	31.9847	0.997932	0.618599	1.61321	0.106698	0.24505	SPIRE2	Not Significant
ENSG00000156873	60.9639	0.997645	0.524418	1.90238	0.0571209	0.165432	PHKG2	Not Significant
ENSG00000130299	106.878	0.997603	0.568476	1.75487	0.0792812	0.203484	GTPBP3	Not Significant
ENSG00000110107	643.459	0.99745	0.471386	2.11599	0.0343453	0.119712	PRPF19	Not Significant
ENSG00000105642	14.7178	0.997298	0.801152	1.24483	0.213194	0.375066	KCNN1	Not Significant
ENSG00000102125	31.1574	0.996994	0.624356	1.59684	0.110302	0.249422	TAFAZZIN	Not Significant
ENSG00000102882	58.3197	0.996886	0.476879	2.09044	0.0365786	0.124681	MAPK3	Not Significant
ENSG00000162511	324.714	0.996542	0.459475	2.16887	0.0300927	0.110697	LAPTM5	Not Significant
ENSG00000147443	47.175	0.996497	0.487542	2.04392	0.0409613	0.134276	DOK2	Not Significant
ENSG00000115307	287.703	0.995658	0.52707	1.88904	0.058886	0.167952	AUP1	Not Significant
ENSG00000095321	38.3696	0.995461	0.489562	2.03337	0.0420153	0.136345	CRAT	Not Significant
ENSG00000273604	61.1656	0.994934	0.559815	1.77726	0.0755263	0.197186	EPOP	Not Significant
ENSG00000187244	9.00219	0.994779	0.892493	1.11461	0.265019	NA	BCAM	Not Significant
ENSG00000076604	215.967	0.994356	0.451	2.20478	0.0274696	0.10492	TRAF4	Not Significant
ENSG00000131748	156.372	0.993782	0.55431	1.79283	0.0730007	0.19395	STARD3	Not Significant
ENSG00000099917	929.325	0.993581	0.401736	2.47322	0.0133901	0.0677353	MED15	Not Significant
ENSG00000063322	118.602	0.992871	0.475314	2.08888	0.0367188	0.125043	MED29	Not Significant
ENSG00000105402	101.097	0.99245	0.463441	2.14148	0.0322351	0.115788	NAPA	Not Significant
ENSG00000055163	23.1857	0.991948	0.634219	1.56405	0.117807	0.258797	CYFIP2	Not Significant
ENSG00000115207	172.71	0.991914	0.402965	2.46154	0.0138342	0.069212	GTF3C2	Not Significant
ENSG00000155876	113.303	0.991671	0.468083	2.11858	0.0341258	0.119212	RRAGA	Not Significant
ENSG00000170468	46.5921	0.991226	0.51318	1.93154	0.0534165	0.158508	RIOX1	Not Significant
ENSG00000101181	175.68	0.991012	0.517496	1.91501	0.0554906	0.162357	MTG2	Not Significant
ENSG00000198053	139.431	0.990928	0.503725	1.9672	0.0491601	0.150613	SIRPA	Not Significant
ENSG00000166484	37.726	0.990614	0.552024	1.79451	0.0727312	0.193374	MAPK7	Not Significant
ENSG00000158104	10.1358	0.990383	0.911998	1.08595	0.277502	NA	HPD	Not Significant
ENSG00000204977	52.7905	0.990259	0.524006	1.88979	0.0587866	0.167817	TRIM13	Not Significant
ENSG00000155760	14.033	0.990116	0.784161	1.26264	0.206717	NA	FZD7	Not Significant
ENSG00000090975	94.2935	0.989744	0.513304	1.92818	0.0538322	0.159446	PITPNM2	Not Significant
ENSG00000123143	650.312	0.989731	0.49884	1.98406	0.0472487	0.146808	PKN1	Not Significant
ENSG00000101246	172.671	0.989726	0.520891	1.90006	0.0574249	0.16568	ARFRP1	Not Significant
ENSG00000196639	8.49709	0.989628	0.873179	1.13336	0.257062	NA	HRH1	Not Significant
ENSG00000011451	222.075	0.989415	0.466195	2.12232	0.0338108	0.118846	WIZ	Not Significant
ENSG00000165458	501.066	0.989343	0.414905	2.38451	0.0171021	0.0785063	INPPL1	Not Significant
ENSG00000131043	122.497	0.988438	0.447972	2.20647	0.0273509	0.104686	AAR2	Not Significant
ENSG00000187017	19.0412	0.986959	0.709147	1.39176	0.163996	0.317478	ESPN	Not Significant
ENSG00000236279	41.6355	0.986629	0.579255	1.70327	0.0885174	0.218247	CLEC2L	Not Significant
ENSG00000254986	153.502	0.985404	0.451163	2.18414	0.0289518	0.108024	DPP3	Not Significant
ENSG00000169241	97.663	0.985291	0.604913	1.62882	0.103352	0.240438	SLC50A1	Not Significant
ENSG00000127586	91.2405	0.984882	0.603656	1.63153	0.102779	0.239715	CHTF18	Not Significant
ENSG00000138835	10.1447	0.98455	0.844778	1.16545	0.243835	NA	RGS3	Not Significant
ENSG00000182378	239.244	0.98355	0.514451	1.91184	0.0558964	0.163049	PLCXD1	Not Significant
ENSG00000203814	189.097	0.983439	0.48078	2.04551	0.0408048	0.133998	H2BC18	Not Significant
ENSG00000178149	20.593	0.983424	0.61487	1.5994	0.109731	0.248888	DALRD3	Not Significant
ENSG00000077782	24.0435	0.982182	0.66797	1.4704	0.141454	0.288702	FGFR1	Not Significant
ENSG00000198853	107.74	0.982093	0.44876	2.18846	0.0286362	0.107351	RUSC2	Not Significant
ENSG00000179364	90.2475	0.981465	0.516624	1.89977	0.0574637	0.16568	PACS2	Not Significant
ENSG00000196655	161.598	0.981181	0.487635	2.01212	0.0442069	0.140994	TRAPPC4	Not Significant
ENSG00000099331	854.713	0.980824	0.457311	2.14476	0.0319719	0.115284	MYO9B	Not Significant
ENSG00000158122	26.5185	0.980396	0.65354	1.50013	0.13358	0.280015	PRXL2C	Not Significant
ENSG00000229117	129.043	0.980172	0.529422	1.8514	0.0641123	0.177744	RPL41	Not Significant
ENSG00000153048	65.52	0.979928	0.501107	1.95553	0.0505211	0.153326	CARHSP1	Not Significant
ENSG00000106624	26.6145	0.97917	0.68751	1.42423	0.15438	0.305743	AEBP1	Not Significant
ENSG00000087111	288.924	0.97904	0.439644	2.2269	0.0259542	0.101886	PIGS	Not Significant
ENSG00000166002	26.7537	0.978449	0.569522	1.71802	0.0857934	0.214327	SMCO4	Not Significant
ENSG00000146701	1082.7	0.978325	0.490597	1.99415	0.0461354	0.144703	MDH2	Not Significant
ENSG00000132740	136.508	0.978306	0.450155	2.17326	0.0297605	0.109954	IGHMBP2	Not Significant
ENSG00000242612	11.5844	0.977714	0.733067	1.33373	0.182292	NA	DECR2	Not Significant
ENSG00000214655	206.62	0.977618	0.436782	2.23823	0.0252061	0.100022	ZSWIM8	Not Significant
ENSG00000120913	12.1864	0.977541	0.759966	1.2863	0.19834	NA	PDLIM2	Not Significant
ENSG00000134490	73.6459	0.976986	0.542422	1.80116	0.0716784	0.191736	TMEM241	Not Significant
ENSG00000181789	423.263	0.976626	0.382474	2.55344	0.0106664	0.058752	COPG1	Not Significant
ENSG00000107738	147.451	0.976563	0.625757	1.56061	0.118615	0.259585	VSIR	Not Significant
ENSG00000204628	2867.33	0.976042	0.455992	2.14048	0.0323159	0.115891	RACK1	Not Significant
ENSG00000167965	110.239	0.975536	0.514849	1.8948	0.0581191	0.166606	MLST8	Not Significant
ENSG00000157734	21.5275	0.975412	0.588354	1.65787	0.0973443	0.231613	SNX22	Not Significant
ENSG00000137221	116.908	0.975253	0.460191	2.11924	0.0340705	0.119212	TJAP1	Not Significant
ENSG00000175866	92.1879	0.974785	0.482309	2.02108	0.0432718	0.139063	BAIAP2	Not Significant
ENSG00000132024	108.017	0.974393	0.472625	2.06166	0.0392399	0.130518	CC2D1A	Not Significant
ENSG00000099889	132.071	0.974369	0.475317	2.04994	0.0403708	0.132903	ARVCF	Not Significant
ENSG00000183020	162.666	0.97408	0.439861	2.21452	0.0267932	0.103418	AP2A2	Not Significant
ENSG00000116337	181.827	0.973803	0.452199	2.15348	0.0312807	0.113543	AMPD2	Not Significant
ENSG00000144567	211.859	0.973622	0.432831	2.24943	0.0244853	0.0983181	RETREG2	Not Significant
ENSG00000141391	20.71	0.973466	0.629609	1.54615	0.122069	0.264556	PRELID3A	Not Significant
ENSG00000116396	34.1791	0.973154	0.563683	1.72642	0.084272	0.211587	KCNC4	Not Significant
ENSG00000105397	369.737	0.973064	0.435584	2.23393	0.0254877	0.100792	TYK2	Not Significant
ENSG00000130513	35.2342	0.972906	0.616248	1.57876	0.114391	0.255197	GDF15	Not Significant
ENSG00000144504	70.3716	0.972489	0.463594	2.09772	0.0359303	0.123431	ANKMY1	Not Significant
ENSG00000249196	149.085	0.972432	0.521984	1.86295	0.0624689	0.174687	TMEM132D-AS1	Not Significant
ENSG00000135632	136.68	0.972397	0.504516	1.92739	0.0539315	0.15961	SMYD5	Not Significant
ENSG00000215041	112.739	0.972203	0.468864	2.07353	0.0381229	0.128152	NEURL4	Not Significant
ENSG00000140365	99.6469	0.972188	0.516516	1.8822	0.0598087	0.169237	COMMD4	Not Significant
ENSG00000110921	55.1023	0.97211	0.511593	1.90016	0.0574119	0.16568	MVK	Not Significant
ENSG00000176022	109.694	0.971918	0.501609	1.9376	0.052672	0.157156	B3GALT6	Not Significant
ENSG00000127419	24.3227	0.97184	0.732142	1.32739	0.184379	0.342205	TMEM175	Not Significant
ENSG00000117394	541.531	0.971616	0.462254	2.10191	0.0355613	0.122586	SLC2A1	Not Significant
ENSG00000105373	682.192	0.970861	0.466349	2.08183	0.0373578	0.126277	NOP53	Not Significant
ENSG00000173540	75.4314	0.970778	0.531981	1.82484	0.0680256	0.184899	GMPPB	Not Significant
ENSG00000198331	13.9106	0.970415	0.696097	1.39408	0.163294	NA	HYLS1	Not Significant
ENSG00000132879	26.3334	0.970385	0.542284	1.78944	0.073544	0.194779	FBXO44	Not Significant
ENSG00000134463	33.3728	0.968757	0.541058	1.79049	0.0733759	0.194531	ECHDC3	Not Significant
ENSG00000049247	10.3954	0.968717	0.750644	1.29051	0.196872	NA	UTS2	Not Significant
ENSG00000176248	90.8722	0.968443	0.558807	1.73306	0.0830859	0.209473	ANAPC2	Not Significant
ENSG00000107263	658.276	0.967033	0.426725	2.26617	0.0234409	0.0953466	RAPGEF1	Not Significant
ENSG00000160050	19.5654	0.966644	0.614231	1.57375	0.115546	0.256554	CCDC28B	Not Significant
ENSG00000126822	15.165	0.966641	0.737382	1.31091	0.189888	0.348553	PLEKHG3	Not Significant
ENSG00000265148	26.704	0.966483	0.604253	1.59947	0.109717	0.248888	TSPOAP1-AS1	Not Significant
ENSG00000103932	299.353	0.966406	0.405668	2.38226	0.0172069	0.0786908	RPAP1	Not Significant
ENSG00000132768	287.987	0.966116	0.520506	1.85611	0.0634377	0.176498	DPH2	Not Significant
ENSG00000130309	509.973	0.965976	0.55686	1.73468	0.0827969	0.209157	COLGALT1	Not Significant
ENSG00000054148	51.452	0.965758	0.57994	1.66527	0.0958585	0.229432	PHPT1	Not Significant
ENSG00000126903	107.617	0.965494	0.618456	1.56114	0.118492	0.25947	SLC10A3	Not Significant
ENSG00000067606	15.2056	0.965382	0.736369	1.311	0.189857	0.348553	PRKCZ	Not Significant
ENSG00000169727	254.98	0.965065	0.495995	1.94571	0.051689	0.155194	GPS1	Not Significant
ENSG00000105669	222.258	0.964897	0.495042	1.94912	0.0512808	0.154477	COPE	Not Significant
ENSG00000105135	59.9538	0.964422	0.515374	1.87131	0.0613027	0.172308	ILVBL	Not Significant
ENSG00000111321	168.65	0.9644	0.559414	1.72395	0.0847174	0.212332	LTBR	Not Significant
ENSG00000168487	60.5384	0.96336	0.541016	1.78065	0.0749699	0.196511	BMP1	Not Significant
ENSG00000159335	432.386	0.963049	0.541669	1.77793	0.0754156	0.197163	PTMS	Not Significant
ENSG00000182473	172.2	0.962606	0.456776	2.10739	0.0350834	0.12165	EXOC7	Not Significant
ENSG00000168792	43.5312	0.961835	0.551788	1.74312	0.081312	0.206616	ABHD15	Not Significant
ENSG00000125458	33.8815	0.961642	0.616623	1.55953	0.118871	0.259985	NT5C	Not Significant
ENSG00000196411	302.256	0.961567	0.487389	1.9729	0.0485074	0.149449	EPHB4	Not Significant
ENSG00000004809	22.8855	0.96144	0.69528	1.38281	0.166723	0.320916	SLC22A16	Not Significant
ENSG00000167775	86.6352	0.961168	0.676295	1.42123	0.155251	0.306808	CD320	Not Significant
ENSG00000068024	166.184	0.960794	0.484798	1.98184	0.0474969	0.147336	HDAC4	Not Significant
ENSG00000161036	148.329	0.960771	0.555826	1.72855	0.0838904	0.210944	LRWD1	Not Significant
ENSG00000134825	97.5229	0.960769	0.580304	1.65563	0.0977968	0.232246	TMEM258	Not Significant
ENSG00000148399	93.0448	0.960745	0.505709	1.8998	0.0574594	0.16568	DPH7	Not Significant
ENSG00000124126	501.348	0.960628	0.492789	1.94937	0.0512512	0.154448	PREX1	Not Significant
ENSG00000123243	202.056	0.960431	0.427218	2.24811	0.0245695	0.0985115	ITIH5	Not Significant
ENSG00000197324	306.869	0.960261	0.50832	1.88909	0.05888	0.167952	LRP10	Not Significant
ENSG00000102967	77.7181	0.960056	0.450489	2.13114	0.0330774	0.117419	DHODH	Not Significant
ENSG00000104774	137.666	0.959782	0.469867	2.04267	0.0410855	0.134562	MAN2B1	Not Significant
ENSG00000142347	355.214	0.959774	0.450716	2.12944	0.0332177	0.117614	MYO1F	Not Significant
ENSG00000121966	58.2474	0.959468	0.4922	1.94935	0.0512542	0.154448	CXCR4	Not Significant
ENSG00000197561	199.032	0.959147	0.509726	1.88169	0.059878	0.169342	ELANE	Not Significant
ENSG00000288920	89.7032	0.958955	0.439054	2.18414	0.0289521	0.108024	RPSA2	Not Significant
ENSG00000101442	37.5296	0.958461	0.571503	1.67709	0.0935253	0.226119	ACTR5	Not Significant
ENSG00000100412	323.541	0.958293	0.464452	2.06328	0.0390862	0.130192	ACO2	Not Significant
ENSG00000156471	430.638	0.9577	0.458457	2.08896	0.036711	0.125043	PTDSS1	Not Significant
ENSG00000184178	112.194	0.957636	0.449314	2.13133	0.0330621	0.117419	SCFD2	Not Significant
ENSG00000231389	18.1723	0.957391	0.638611	1.49918	0.133828	0.280135	HLA-DPA1	Not Significant
ENSG00000130202	210.665	0.95678	0.504248	1.89744	0.0577699	0.166008	NECTIN2	Not Significant
ENSG00000167740	9.21357	0.956648	0.790919	1.20954	0.226455	NA	CYB5D2	Not Significant
ENSG00000141569	139.429	0.956458	0.485829	1.96871	0.0489862	0.150206	TRIM65	Not Significant
ENSG00000130758	17.1502	0.956434	0.799179	1.19677	0.231396	0.394283	MAP3K10	Not Significant
ENSG00000007384	17.1448	0.956427	0.654747	1.46076	0.144082	0.291999	RHBDF1	Not Significant
ENSG00000271503	28.2996	0.955645	0.655881	1.45704	0.145106	0.293261	CCL5	Not Significant
ENSG00000143575	299.834	0.955627	0.382983	2.49522	0.0125879	0.0651197	HAX1	Not Significant
ENSG00000100105	93.3436	0.954509	0.54299	1.75788	0.0787683	0.2025	PATZ1	Not Significant
ENSG00000149930	409.797	0.954401	0.449735	2.12214	0.0338258	0.118846	TAOK2	Not Significant
ENSG00000063978	167.624	0.953459	0.442305	2.15566	0.0311101	0.113036	RNF4	Not Significant
ENSG00000135127	72.3443	0.953305	0.504844	1.88832	0.0589836	0.167986	BICDL1	Not Significant
ENSG00000137409	629.196	0.953303	0.431926	2.2071	0.0273071	0.104555	MTCH1	Not Significant
ENSG00000164078	7.8435	0.953151	0.973575	0.979021	0.32757	NA	MST1R	Not Significant
ENSG00000141971	32.3969	0.95306	0.586841	1.62405	0.104365	0.241666	MVB12A	Not Significant
ENSG00000101132	32.998	0.952487	0.619172	1.53832	0.12397	0.267126	PFDN4	Not Significant
ENSG00000069966	10.2198	0.952146	0.781001	1.21914	0.222793	NA	GNB5	Not Significant
ENSG00000112514	271.873	0.951927	0.542793	1.75376	0.0794721	0.203751	CUTA	Not Significant
ENSG00000084652	780.871	0.951872	0.382645	2.48761	0.0128604	0.0660689	TXLNA	Not Significant
ENSG00000160447	120.068	0.951618	0.462037	2.05962	0.0394353	0.130799	PKN3	Not Significant
ENSG00000061938	79.5919	0.951485	0.524743	1.81324	0.069795	0.188446	TNK2	Not Significant
ENSG00000144029	18.8723	0.950315	0.61755	1.53885	0.123842	0.267024	MRPS5	Not Significant
ENSG00000105613	24.9757	0.950085	0.558041	1.70254	0.0886546	0.218501	MAST1	Not Significant
ENSG00000091073	46.066	0.949991	0.510199	1.862	0.0626032	0.174887	DTX2	Not Significant
ENSG00000254901	26.9004	0.949964	0.590314	1.60925	0.107561	0.245866	BORCS8	Not Significant
ENSG00000167996	801.68	0.949142	0.579864	1.63684	0.101665	0.238355	FTH1	Not Significant
ENSG00000221926	17.1583	0.94869	0.661934	1.43321	0.151798	0.302812	TRIM16	Not Significant
ENSG00000162910	90.2487	0.947546	0.550485	1.72129	0.0851978	0.213277	MRPL55	Not Significant
ENSG00000138459	18.8364	0.946958	0.622901	1.52024	0.128451	0.273468	SLC35A5	Not Significant
ENSG00000178726	275.887	0.946941	0.582677	1.62516	0.104129	0.241274	THBD	Not Significant
ENSG00000161671	122.996	0.946465	0.618287	1.53079	0.125822	0.269756	EMC10	Not Significant
ENSG00000149782	260.151	0.946101	0.442383	2.13865	0.0324642	0.116222	PLCB3	Not Significant
ENSG00000104825	88.8876	0.945858	0.570301	1.65852	0.0972116	0.231509	NFKBIB	Not Significant
ENSG00000112578	193.12	0.945323	0.426238	2.21783	0.0265666	0.103059	BYSL	Not Significant
ENSG00000183011	33.0763	0.944905	0.553172	1.70816	0.0876071	0.216539	NAA38	Not Significant
ENSG00000125734	49.3689	0.944894	0.520132	1.81664	0.069272	0.187404	GPR108	Not Significant
ENSG00000154957	7.50583	0.944753	0.864821	1.09243	0.274646	NA	ZNF18	Not Significant
ENSG00000127948	237.44	0.944648	0.529653	1.78352	0.0745013	0.196029	POR	Not Significant
ENSG00000164050	32.1697	0.944642	0.681396	1.38633	0.165645	0.319514	PLXNB1	Not Significant
ENSG00000197457	103.752	0.944586	0.487923	1.93593	0.0528758	0.157592	STMN3	Not Significant
ENSG00000102225	278.774	0.944011	0.429841	2.19619	0.0280784	0.1061	CDK16	Not Significant
ENSG00000186166	20.2654	0.943902	0.658348	1.43374	0.151646	0.302678	CENATAC	Not Significant
ENSG00000231925	274.221	0.942833	0.562362	1.67656	0.093629	0.226189	TAPBP	Not Significant
ENSG00000178623	65.7332	0.942766	0.734793	1.28304	0.19948	0.359004	GPR35	Not Significant
ENSG00000003989	60.3606	0.942661	0.695128	1.3561	0.175069	0.330254	SLC7A2	Not Significant
ENSG00000099822	20.4536	0.942462	0.683309	1.37926	0.167814	0.321844	HCN2	Not Significant
ENSG00000149823	136.935	0.942125	0.492258	1.91388	0.0556351	0.162589	VPS51	Not Significant
ENSG00000105193	1657.87	0.941591	0.481986	1.95357	0.0507525	0.153645	RPS16	Not Significant
ENSG00000123411	69.5395	0.941458	0.641584	1.4674	0.142268	0.28977	IKZF4	Not Significant
ENSG00000064545	80.0065	0.940298	0.530334	1.77303	0.0762241	0.198219	TMEM161A	Not Significant
ENSG00000163584	33.4558	0.940109	0.589094	1.59586	0.110521	0.249852	RPL22L1	Not Significant
ENSG00000161179	584.963	0.940035	0.527867	1.78082	0.0749422	0.196511	YDJC	Not Significant
ENSG00000168528	12.5961	0.939958	0.86634	1.08498	0.277932	NA	SERINC2	Not Significant
ENSG00000176108	61.3517	0.939767	0.53887	1.74396	0.0811662	0.206293	CHMP6	Not Significant
ENSG00000128283	223.227	0.939656	0.560521	1.6764	0.0936605	0.226189	CDC42EP1	Not Significant
ENSG00000139636	50.6405	0.939567	0.483559	1.94302	0.0520132	0.15583	LMBR1L	Not Significant
ENSG00000183251	103.978	0.938109	0.512687	1.82979	0.0672814	0.183611	OR51B4	Not Significant
ENSG00000163823	63.3253	0.937581	0.596795	1.57103	0.116176	0.257381	CCR1	Not Significant
ENSG00000198951	202.334	0.937567	0.460633	2.03539	0.041812	0.136007	NAGA	Not Significant
ENSG00000100911	247.383	0.937471	0.45589	2.05635	0.0397487	0.131481	PSME2	Not Significant
ENSG00000100219	211.202	0.937346	0.443734	2.11241	0.0346516	0.120588	XBP1	Not Significant
ENSG00000130985	599.771	0.937062	0.41287	2.26963	0.0232299	0.0950174	UBA1	Not Significant
ENSG00000168495	294.806	0.936977	0.391341	2.39428	0.0166532	0.0770913	POLR3D	Not Significant
ENSG00000175701	21.9136	0.9368	0.724899	1.29232	0.196247	0.355241	MTLN	Not Significant
ENSG00000134590	127.226	0.936125	0.505495	1.8519	0.0640406	0.177635	RTL8C	Not Significant
ENSG00000169429	38.4917	0.936093	0.817117	1.1456	0.251959	0.41709	CXCL8	Not Significant
ENSG00000089154	1611.95	0.935845	0.368052	2.5427	0.011	0.0598125	GCN1	Not Significant
ENSG00000164430	30.7581	0.935725	0.551055	1.69806	0.0894962	0.219919	CGAS	Not Significant
ENSG00000160117	41.9882	0.935713	0.580792	1.6111	0.107158	0.245489	ANKLE1	Not Significant
ENSG00000132128	298.236	0.935566	0.431348	2.16893	0.0300878	0.110697	LRRC41	Not Significant
ENSG00000147439	87.4474	0.935393	0.473515	1.97542	0.04822	0.14873	BIN3	Not Significant
ENSG00000140326	143.309	0.935206	0.441787	2.11687	0.0342707	0.119566	CDAN1	Not Significant
ENSG00000149639	687.954	0.935141	0.418452	2.23476	0.0254331	0.100612	MTCL2	Not Significant
ENSG00000103152	57.7275	0.934161	0.487051	1.91799	0.0551119	0.161577	MPG	Not Significant
ENSG00000101363	49.1107	0.933673	0.481246	1.94012	0.0523656	0.156583	MANBAL	Not Significant
ENSG00000143126	370.691	0.933596	0.51206	1.82321	0.0682708	0.185244	CELSR2	Not Significant
ENSG00000139370	35.827	0.933522	0.500841	1.86391	0.0623345	0.174447	SLC15A4	Not Significant
ENSG00000186185	156.584	0.933412	0.471838	1.97825	0.0479008	0.148205	KIF18B	Not Significant
ENSG00000163156	85.6637	0.93311	0.532624	1.75191	0.0797893	0.204214	SCNM1	Not Significant
ENSG00000141867	932.473	0.933064	0.445106	2.09627	0.0360579	0.123598	BRD4	Not Significant
ENSG00000055118	1121.69	0.932634	0.495179	1.88343	0.0596425	0.169023	KCNH2	Not Significant
ENSG00000126602	435.726	0.932408	0.39559	2.35701	0.0184229	0.0820274	TRAP1	Not Significant
ENSG00000164054	183.916	0.932336	0.484464	1.92447	0.0542961	0.160084	SHISA5	Not Significant
ENSG00000130748	11.6147	0.932131	0.854215	1.09121	0.275179	NA	TMEM160	Not Significant
ENSG00000168028	2017.91	0.932075	0.392652	2.37379	0.0176063	0.0795879	RPSA	Not Significant
ENSG00000177595	55.2359	0.932039	0.617305	1.50985	0.131081	0.277182	PIDD1	Not Significant
ENSG00000171311	54.9137	0.931861	0.56702	1.64344	0.100293	0.236178	EXOSC1	Not Significant
ENSG00000198435	35.8144	0.931473	0.674934	1.3801	0.167557	0.321562	NRARP	Not Significant
ENSG00000105607	58.9583	0.930976	0.482986	1.92754	0.0539121	0.159596	GCDH	Not Significant
ENSG00000166073	8.34391	0.930387	0.960261	0.96889	0.3326	NA	GPR176	Not Significant
ENSG00000153904	13.7245	0.930139	0.780649	1.19149	0.233459	NA	DDAH1	Not Significant
ENSG00000101150	286.893	0.930053	0.407797	2.28068	0.0225674	0.093282	TPD52L2	Not Significant
ENSG00000196372	57.8473	0.929965	0.462836	2.00927	0.044508	0.141445	ASB13	Not Significant
ENSG00000079974	11.3339	0.929847	0.757467	1.22757	0.219607	NA	RABL2B	Not Significant
ENSG00000176476	26.803	0.929583	0.607434	1.53034	0.125931	0.269937	SGF29	Not Significant
ENSG00000284691	13.2661	0.929022	0.731013	1.27087	0.203775	NA	LOC728743	Not Significant
ENSG00000185900	173.844	0.928901	0.470002	1.97638	0.0481122	0.148523	POMK	Not Significant
ENSG00000276045	42.5466	0.928856	0.57979	1.60206	0.109143	0.248016	ORAI1	Not Significant
ENSG00000145014	28.4486	0.928704	0.547611	1.69592	0.0899009	0.22059	TMEM44	Not Significant
ENSG00000130402	1256.85	0.928192	0.517532	1.7935	0.0728937	0.193759	ACTN4	Not Significant
ENSG00000184162	39.8773	0.927606	0.647064	1.43356	0.151698	0.302678	NR2C2AP	Not Significant
ENSG00000171307	81.4702	0.927581	0.506381	1.83179	0.0669833	0.183019	ZDHHC16	Not Significant
ENSG00000169696	59.3783	0.927065	0.55324	1.6757	0.0937968	0.226255	ASPSCR1	Not Significant
ENSG00000160209	1048.72	0.926436	0.403248	2.29744	0.0215939	0.0909778	PDXK	Not Significant
ENSG00000130475	88.2766	0.926433	0.457162	2.02649	0.0427148	0.138165	FCHO1	Not Significant
ENSG00000148331	94.9415	0.926314	0.525851	1.76155	0.0781452	0.201559	ASB6	Not Significant
ENSG00000132005	62.7198	0.926224	0.541217	1.71137	0.0870123	0.215652	RFX1	Not Significant
ENSG00000134910	501.008	0.926199	0.408399	2.26788	0.0233367	0.0951207	STT3A	Not Significant
ENSG00000160360	65.4759	0.925525	0.548782	1.68651	0.0916982	0.223129	GPSM1	Not Significant
ENSG00000142534	2578.95	0.925392	0.47822	1.93508	0.0529808	0.157819	RPS11	Not Significant
ENSG00000100324	132.4	0.925323	0.418114	2.21308	0.0268918	0.103543	TAB1	Not Significant
ENSG00000073050	77.9515	0.925259	0.428345	2.16008	0.0307667	0.112422	XRCC1	Not Significant
ENSG00000072110	528.567	0.925187	0.421345	2.19579	0.0281067	0.10612	ACTN1	Not Significant
ENSG00000196453	164.919	0.924589	0.466662	1.98128	0.0475598	0.147357	ZNF777	Not Significant
ENSG00000137038	52.1592	0.924218	0.551909	1.67458	0.0940162	0.226606	DMAC1	Not Significant
ENSG00000166925	243.275	0.923916	0.467545	1.9761	0.0481432	0.148535	TSC22D4	Not Significant
ENSG00000205356	73.6078	0.923728	0.5203	1.77538	0.0758359	0.197696	TECPR1	Not Significant
ENSG00000165282	40.3512	0.923722	0.574628	1.60751	0.107942	0.24641	PIGO	Not Significant
ENSG00000177830	219.862	0.923464	0.489791	1.88543	0.0593723	0.168655	CHID1	Not Significant
ENSG00000183077	75.3577	0.923243	0.485647	1.90106	0.0572946	0.165629	AFMID	Not Significant
ENSG00000166825	44.3208	0.923136	0.495187	1.86422	0.0622912	0.174371	ANPEP	Not Significant
ENSG00000185252	265.074	0.923123	0.429963	2.14698	0.0317946	0.1148	ZNF74	Not Significant
ENSG00000103343	45.0721	0.922713	0.491859	1.87597	0.0606594	0.170839	ZNF174	Not Significant
ENSG00000187608	31.4858	0.922696	0.668717	1.3798	0.167648	0.32168	ISG15	Not Significant
ENSG00000236104	34.1318	0.922485	0.567576	1.6253	0.104098	0.241274	ZBTB22	Not Significant
ENSG00000168591	57.9952	0.921578	0.536495	1.71778	0.0858376	0.21434	TMUB2	Not Significant
ENSG00000261373	70.7039	0.920819	0.667836	1.37881	0.167953	0.322041	VPS9D1-AS1	Not Significant
ENSG00000149257	338.874	0.920738	0.516616	1.78225	0.0747089	0.196252	SERPINH1	Not Significant
ENSG00000179115	489.381	0.920674	0.480113	1.91762	0.0551592	0.161673	FARSA	Not Significant
ENSG00000109099	52.4682	0.920592	0.537875	1.71154	0.0869822	0.215626	PMP22	Not Significant
ENSG00000167613	283.7	0.920422	0.45084	2.04157	0.0411942	0.134709	LAIR1	Not Significant
ENSG00000083845	1797.36	0.920133	0.42047	2.18834	0.0286446	0.107351	RPS5	Not Significant
ENSG00000155229	166.042	0.919766	0.416676	2.20739	0.027287	0.104551	MMS19	Not Significant
ENSG00000007516	9.12246	0.91931	0.939602	0.978403	0.327875	NA	BAIAP3	Not Significant
ENSG00000102034	424.322	0.918754	0.418547	2.1951	0.0281562	0.106142	ELF4	Not Significant
ENSG00000175634	138.746	0.918313	0.4606	1.99373	0.0461812	0.144764	RPS6KB2	Not Significant
ENSG00000157613	61.3355	0.91805	0.519507	1.76716	0.0772019	0.199737	CREB3L1	Not Significant
ENSG00000120709	213.417	0.917941	0.501505	1.83037	0.0671946	0.183505	FAM53C	Not Significant
ENSG00000158716	17.5498	0.917497	0.743681	1.23372	0.217306	0.379317	DUSP23	Not Significant
ENSG00000118181	1622.96	0.917483	0.456829	2.00837	0.0446037	0.141445	RPS25	Not Significant
ENSG00000092068	291.077	0.917435	0.529668	1.7321	0.0832565	0.209672	SLC7A8	Not Significant
ENSG00000158470	470.209	0.917181	0.424237	2.16196	0.0306215	0.11204	B4GALT5	Not Significant
ENSG00000115289	36.7646	0.916776	0.603676	1.51866	0.128849	0.274048	PCGF1	Not Significant
ENSG00000145979	109.31	0.91635	0.523031	1.752	0.0797739	0.204214	TBC1D7	Not Significant
ENSG00000172216	80.0277	0.916175	0.542082	1.6901	0.0910082	0.222239	CEBPB	Not Significant
ENSG00000122140	130.112	0.916161	0.592857	1.54533	0.122266	0.264929	MRPS2	Not Significant
ENSG00000105656	113.358	0.914094	0.469249	1.94799	0.051416	0.154756	ELL	Not Significant
ENSG00000139405	103.174	0.91355	0.556452	1.64174	0.100644	0.236563	RITA1	Not Significant
ENSG00000105639	11.2418	0.912323	0.713727	1.27825	0.20116	NA	JAK3	Not Significant
ENSG00000106327	196.323	0.912228	0.539578	1.69063	0.0909075	0.222115	TFR2	Not Significant
ENSG00000166813	24.9728	0.91183	0.609713	1.49551	0.134783	0.281265	KIF7	Not Significant
ENSG00000104823	137.138	0.91179	0.420786	2.16687	0.0302444	0.110887	ECH1	Not Significant
ENSG00000196961	571	0.911315	0.403501	2.25852	0.0239131	0.0965963	AP2A1	Not Significant
ENSG00000132906	88.7116	0.910789	0.482254	1.88861	0.0589441	0.167984	CASP9	Not Significant
ENSG00000108788	133.733	0.910696	0.465234	1.9575	0.0502885	0.152916	MLX	Not Significant
ENSG00000172809	1025.89	0.910609	0.519972	1.75126	0.0799004	0.204447	RPL38	Not Significant
ENSG00000198925	123.803	0.910559	0.426756	2.13368	0.0328692	0.117127	ATG9A	Not Significant
ENSG00000167994	104.932	0.91055	0.538625	1.69051	0.0909305	0.222115	RAB3IL1	Not Significant
ENSG00000089597	894.933	0.909765	0.44322	2.05263	0.0401089	0.132472	GANAB	Not Significant
ENSG00000112137	143.505	0.909166	0.425869	2.13485	0.0327733	0.11693	PHACTR1	Not Significant
ENSG00000112667	74.5876	0.908839	0.522392	1.73976	0.0819005	0.207871	DNPH1	Not Significant
ENSG00000136026	22.449	0.908336	0.669541	1.35665	0.174891	0.330202	CKAP4	Not Significant
ENSG00000121075	11.999	0.908266	0.706428	1.28572	0.198542	NA	TBX4	Not Significant
ENSG00000188070	78.5618	0.908237	0.453346	2.00341	0.0451334	0.142662	ZFTA	Not Significant
ENSG00000122873	66.1766	0.907774	0.459288	1.97648	0.0481002	0.148523	CISD1	Not Significant
ENSG00000204576	86.3506	0.90759	0.547574	1.65747	0.0974237	0.231643	PRR3	Not Significant
ENSG00000100395	122.381	0.907559	0.462604	1.96185	0.04978	0.15196	L3MBTL2	Not Significant
ENSG00000183018	12.4406	0.907459	0.822459	1.10335	0.269876	NA	SPNS2	Not Significant
ENSG00000174938	44.4841	0.907353	0.626123	1.44916	0.147292	0.296492	SEZ6L2	Not Significant
ENSG00000056972	73.7706	0.907333	0.496327	1.82809	0.0675355	0.184038	TRAF3IP2	Not Significant
ENSG00000171135	95.5619	0.907299	0.490489	1.84979	0.0643445	0.178207	JAGN1	Not Significant
ENSG00000135451	107.231	0.907281	0.462534	1.96155	0.0498155	0.152026	TROAP	Not Significant
ENSG00000169246	13.3723	0.907227	0.776037	1.16905	0.242383	NA	NPIPB3	Not Significant
ENSG00000120896	23.0395	0.906532	0.668366	1.35634	0.174991	0.330254	SORBS3	Not Significant
ENSG00000007264	72.0063	0.906357	0.50152	1.80722	0.0707278	0.190262	MATK	Not Significant
ENSG00000102119	214.019	0.905756	0.542884	1.66841	0.0952334	0.228357	EMD	Not Significant
ENSG00000100023	587.529	0.905728	0.413435	2.19074	0.0284707	0.106992	PPIL2	Not Significant
ENSG00000039523	71.138	0.905397	0.514149	1.76096	0.0782446	0.201721	RIPOR1	Not Significant
ENSG00000164742	91.7759	0.905139	0.56056	1.61471	0.106374	0.244512	ADCY1	Not Significant
ENSG00000255717	355.976	0.905106	0.396367	2.2835	0.0224007	0.092873	SNHG1	Not Significant
ENSG00000136271	267.11	0.904271	0.438185	2.06368	0.0390485	0.130152	DDX56	Not Significant
ENSG00000065970	105.709	0.904132	0.43769	2.06569	0.0388577	0.129905	FOXJ2	Not Significant
ENSG00000132793	26.9146	0.903849	0.558739	1.61766	0.105736	0.243658	LPIN3	Not Significant
ENSG00000141401	37.3827	0.903763	0.532987	1.69566	0.0899506	0.22059	IMPA2	Not Significant
ENSG00000088038	244.954	0.903279	0.423763	2.13157	0.0330425	0.117419	CNOT3	Not Significant
ENSG00000099875	550.282	0.902942	0.50192	1.79897	0.0720227	0.192049	MKNK2	Not Significant
ENSG00000235162	15.5078	0.902913	0.721974	1.25062	0.211074	0.372412	C12orf75	Not Significant
ENSG00000236552	194.199	0.902819	0.475084	1.90034	0.0573889	0.16568	RPL13AP5	Not Significant
ENSG00000137817	86.9448	0.902567	0.46372	1.94636	0.0516113	0.155089	PARP6	Not Significant
ENSG00000173402	125.879	0.902467	0.498257	1.81125	0.0701023	0.188876	DAG1	Not Significant
ENSG00000128563	92.5895	0.902341	0.549176	1.64308	0.100366	0.236206	PRKRIP1	Not Significant
ENSG00000198496	22.7377	0.902084	0.612472	1.47286	0.14079	0.28803	NBR2	Not Significant
ENSG00000139192	15.2308	0.901909	0.695488	1.2968	0.1947	0.353369	TAPBPL	Not Significant
ENSG00000165661	114.672	0.901841	0.495924	1.81851	0.0689866	0.186862	QSOX2	Not Significant
ENSG00000134061	14.221	0.901758	0.748323	1.20504	0.228189	NA	CD180	Not Significant
[truncated: 9,381 more rows]

## Sheet: HEL
GeneID	baseMean	log2FoldChange	lfcSE	stat	pvalue	padj	Symbol	Expression
ENSG00000182162	20.1261	8.016	1.27844	6.27014	3.60732e-10	7.51225e-08	P2RY8	Enriched
ENSG00000145358	36.0891	5.99999	0.841681	7.12858	1.01412e-12	4.75177e-10	DDIT4L	Enriched
ENSG00000115607	61.4089	5.7649	0.617912	9.32966	1.06216e-20	1.22508e-17	IL18RAP	Enriched
ENSG00000245848	600.591	5.59455	0.526485	10.6262	2.25042e-26	4.82039e-23	CEBPA	Enriched
ENSG00000153253	452.024	5.40908	0.503084	10.7519	5.80805e-27	1.45143e-23	SCN3A	Enriched
ENSG00000204949	62.1408	5.07623	0.609796	8.32447	8.4707e-17	7.47115e-14	FAM83A-AS1	Enriched
ENSG00000278233	308.553	4.4633	1.77818	2.51003	NA	NA	RNA5-8SN2	Not Significant
ENSG00000144824	20.4073	4.36346	0.744884	5.85791	4.68728e-09	8.07829e-07	PHLDB2	Enriched
ENSG00000221955	14.4357	4.29301	0.802298	5.3509	8.75202e-08	9.6491e-06	SLC12A8	Enriched
ENSG00000147689	1558.45	4.25033	0.294458	14.4344	3.14195e-47	2.35552e-43	FAM83A	Enriched
ENSG00000206737	104.479	4.2421	1.64625	2.57682	NA	NA	RNVU1-18	Not Significant
ENSG00000136546	25.2536	4.09737	0.605143	6.77093	1.27961e-11	4.56822e-09	SCN7A	Enriched
ENSG00000251002	117.112	3.70002	0.478208	7.73725	1.01591e-14	6.92391e-12	TRD-AS1	Enriched
ENSG00000073282	106.619	3.62166	0.624679	5.79763	6.72592e-09	1.09649e-06	TP63	Enriched
ENSG00000116016	2046.93	3.54259	0.24523	14.446	2.65697e-47	2.35552e-43	EPAS1	Enriched
ENSG00000170989	28.8167	3.41984	0.525023	6.5137	7.33242e-11	1.96042e-08	S1PR1	Enriched
ENSG00000156414	26.2273	3.39113	0.571747	5.93118	3.00768e-09	5.3687e-07	TDRD9	Enriched
ENSG00000213293	10.9119	3.27572	0.900129	3.63917	0.000273515	0.00497703	RPL28P5	Enriched
ENSG00000275895	134.452	3.25814	1.37159	2.37544	0.0175281	0.0842631	LOC102724594	Not Significant
ENSG00000267296	15.7927	3.22207	0.644429	4.99989	5.73631e-07	4.33009e-05	CEBPA-DT	Enriched
ENSG00000184545	16.2329	3.21315	0.754189	4.2604	2.0406e-05	0.00071321	DUSP8	Enriched
ENSG00000162676	1417.68	3.13141	0.310421	10.0876	6.26674e-24	9.39635e-21	GFI1	Enriched
ENSG00000201822	13.8101	3.13114	0.725007	4.31877	1.56898e-05	0.000585206	RNA5SP149	Enriched
ENSG00000274917	490.505	3.12728	0.447784	6.98389	2.87124e-12	1.19587e-09	RNA5-8SN5	Enriched
ENSG00000117091	111.606	3.1007	0.358125	8.65815	4.79475e-18	4.79283e-15	CD48	Enriched
ENSG00000133101	48.5432	2.95904	0.527973	5.60452	2.08834e-08	2.82096e-06	CCNA1	Enriched
ENSG00000141655	22.0361	2.7852	0.61828	4.50476	6.64477e-06	0.000303755	TNFRSF11A	Enriched
ENSG00000287080	1552.41	2.78411	0.658947	4.22509	2.3885e-05	0.000813934	H3C3	Enriched
ENSG00000199994	81.6648	2.75849	0.508729	5.42232	5.88289e-08	7.00064e-06	RNA5SP145	Enriched
ENSG00000276700	248.32	2.75738	0.722157	3.81825	0.000134403	0.00299412	RNA5-8SN4	Enriched
ENSG00000277610	17.157	2.68701	0.615239	4.36743	1.25718e-05	0.000489615	RNVU1-4	Enriched
ENSG00000163661	236.236	2.65143	0.366049	7.24337	4.37658e-13	2.43046e-10	PTX3	Enriched
ENSG00000275714	465.01	2.62356	0.684679	3.83182	0.000127201	0.00287236	H3C1	Enriched
ENSG00000207445	38.7618	2.57348	0.756528	3.4017	0.000669675	0.00948168	SNORD15B	Enriched
ENSG00000226525	17.103	2.57225	0.718585	3.5796	0.000344126	0.0058651	RPS7P10	Enriched
ENSG00000081479	204.072	2.54405	0.574376	4.42924	9.45641e-06	0.000392768	LRP2	Enriched
ENSG00000201185	187.294	2.53295	0.639125	3.96315	7.39667e-05	0.00191878	RNA5SP202	Enriched
ENSG00000154639	26.8447	2.53028	0.65245	3.87811	0.00010527	0.00252548	CXADR	Enriched
ENSG00000177943	12.1119	2.48967	0.750571	3.31704	0.000909774	0.0115799	MAMDC4	Enriched
ENSG00000111728	796.291	2.42658	0.36645	6.62186	3.54703e-11	1.08539e-08	ST8SIA1	Enriched
ENSG00000143878	247.462	2.41099	0.368356	6.54528	5.93849e-11	1.68003e-08	RHOB	Enriched
ENSG00000205746	21.1174	2.38314	0.502201	4.74538	2.08112e-06	0.000124086	PKD1P4	Enriched
ENSG00000200087	505.758	2.38267	0.695494	3.42587	0.000612839	0.00890399	SNORA73B	Enriched
ENSG00000233016	359.057	2.38159	0.431639	5.51755	3.43756e-08	4.33132e-06	SNHG7	Enriched
ENSG00000080493	226.249	2.35162	0.345715	6.80219	1.03042e-11	3.76834e-09	SLC4A4	Enriched
ENSG00000201955	195.343	2.34019	1.29573	1.80608	0.0709063	0.20533	RNY3P1	Not Significant
ENSG00000273983	1061.57	2.33962	0.586378	3.98995	6.6088e-05	0.00176321	H3C8	Enriched
ENSG00000143341	2753.45	2.33759	0.63721	3.66848	0.000243993	0.00455111	HMCN1	Enriched
ENSG00000230383	35.5138	2.32645	0.562574	4.13536	3.54395e-05	0.00109787	RPL6P19	Enriched
ENSG00000252316	34.3239	2.30037	0.752648	3.05637	0.00224032	0.0213821	RNY4	Enriched
ENSG00000201321	372.533	2.29718	0.51424	4.46715	7.92703e-06	0.00034352	RNA5S9	Enriched
ENSG00000276168	2061.93	2.29222	0.788924	2.9055	0.0036667	0.0300429	RN7SL1	Enriched
ENSG00000225200	22.4848	2.28776	0.550739	4.15399	3.26734e-05	0.00103793	RPS8P1	Enriched
ENSG00000147044	13.232	2.28483	0.62847	3.63555	0.000277391	0.00503471	CASK	Enriched
ENSG00000136943	67.0077	2.27798	0.369107	6.17161	6.75986e-10	1.33365e-07	CTSV	Enriched
ENSG00000276180	700.897	2.25932	0.638892	3.53631	0.000405753	0.00664178	H4C9	Enriched
ENSG00000115165	149.65	2.24827	0.344874	6.51913	7.07173e-11	1.92788e-08	CYTIP	Enriched
ENSG00000092068	19.7696	2.22699	0.628381	3.54402	0.00039408	0.0064861	SLC7A8	Enriched
ENSG00000139880	19.1109	2.22218	0.584422	3.80235	0.00014333	0.00311217	CDH24	Enriched
ENSG00000202111	16.9673	2.2209	0.824339	2.69416	0.00705673	0.046245	VTRNA1-2	Enriched
ENSG00000160593	14.3702	2.21654	0.668884	3.31379	0.000920393	0.0116853	JAML	Enriched
ENSG00000127863	26.0628	2.18989	0.506999	4.31933	1.56506e-05	0.000585199	TNFRSF19	Enriched
ENSG00000130208	43.8391	2.17985	0.450403	4.83979	1.29976e-06	8.36423e-05	APOC1	Enriched
ENSG00000147257	36.8069	2.15853	0.398869	5.41161	6.24602e-08	7.14907e-06	GPC3	Enriched
ENSG00000111641	14.7262	2.15457	0.597344	3.60692	0.000309849	0.00542108	NOP2	Enriched
ENSG00000215030	11.9932	2.15074	0.749872	2.86814	0.00412887	0.0324467	RPL13P12	Enriched
ENSG00000201302	13.4804	2.14343	0.746378	2.87178	0.00408164	0.0322275	SNORA65	Enriched
ENSG00000197153	1899.94	2.13276	0.634945	3.35896	0.000782355	0.0104212	H3C12	Enriched
ENSG00000270673	11.4615	2.12	0.732804	2.893	0.0038158	0.0308765	YTHDF3-DT	Enriched
ENSG00000273703	815.534	2.11963	0.576649	3.67577	0.000237129	0.00446112	H2BC14	Enriched
ENSG00000125144	20.6103	2.11803	0.778168	2.72181	0.00649257	0.0437527	MT1G	Enriched
ENSG00000177410	143.634	2.10917	0.456861	4.61667	3.89956e-06	0.000201621	ZFAS1	Enriched
ENSG00000276368	801.882	2.09519	0.503205	4.16368	3.13161e-05	0.00100796	H2AC14	Enriched
ENSG00000224437	13.6773	2.09307	0.709635	2.9495	0.00318286	0.0274117	PIGUP1	Enriched
ENSG00000288825	74.1475	2.08223	0.573402	3.63136	0.000281928	0.00507754	H2AC18	Enriched
ENSG00000275221	636.234	2.07895	0.472793	4.39718	1.09665e-05	0.000440837	H2AC15	Enriched
ENSG00000204387	64.337	2.0738	0.627825	3.30314	0.000956077	0.0120264	SNHG32	Enriched
ENSG00000258429	17.8659	2.07127	0.65598	3.15751	0.00159121	0.0169841	PDF	Enriched
ENSG00000222806	148.803	2.04139	0.492091	4.14839	3.34814e-05	0.0010553	RNA5SP225	Enriched
ENSG00000135547	37.7986	2.03379	0.47423	4.28861	1.79798e-05	0.000647652	HEY2	Enriched
ENSG00000145808	163.948	2.03254	0.45874	4.4307	9.39294e-06	0.000391216	ADAMTS19	Enriched
ENSG00000105374	16.3294	2.02992	0.654718	3.10045	0.00193224	0.0193534	NKG7	Enriched
ENSG00000197238	496.53	2.02812	0.561169	3.61409	0.000301402	0.00530426	H4C11	Enriched
ENSG00000182774	42.4012	2.02721	0.693321	2.92391	0.0034566	0.0289059	RPS17	Enriched
ENSG00000104611	167.297	2.02597	0.389322	5.20384	1.95216e-07	1.79166e-05	SH2D4A	Enriched
ENSG00000276903	978.011	2.02559	0.520071	3.89482	9.82704e-05	0.00239978	H2AC16	Enriched
ENSG00000286172	15.6377	2.01534	0.746574	2.69945	0.0069455	0.045736	RNVU1-8	Enriched
ENSG00000225573	11.6193	2.00402	0.749319	2.67446	0.00748497	0.0479	RPL35P5	Enriched
ENSG00000183458	25.2723	1.99461	0.489635	4.07368	4.62768e-05	0.00134348	PKD1P3	Enriched
ENSG00000203811	35.3393	1.98587	0.709898	2.7974	0.00515157	0.0377978	H3C14	Enriched
ENSG00000137752	16.7808	1.98417	0.701787	2.82731	0.00469402	0.0353679	CASP1	Enriched
ENSG00000158850	306.481	1.98216	0.472186	4.19783	2.69483e-05	0.000896539	B4GALT3	Enriched
ENSG00000255717	1103.36	1.97499	0.40596	4.86498	1.14471e-06	7.46253e-05	SNHG1	Enriched
ENSG00000167775	104.543	1.97102	0.520003	3.79041	0.000150399	0.00321791	CD320	Enriched
ENSG00000203852	46.5273	1.95989	0.672534	2.91419	0.00356614	0.0295102	H3C15	Enriched
ENSG00000124614	35.0063	1.95848	0.649317	3.01622	0.00255945	0.0234709	RPS10	Enriched
ENSG00000201098	1805.44	1.95616	0.574676	3.40393	0.000664232	0.0094291	RNY1	Enriched
ENSG00000286522	1672.01	1.94497	0.471146	4.12817	3.65661e-05	0.00112351	H3C2	Enriched
ENSG00000226250	15.9459	1.94263	0.73218	2.65322	0.00797284	0.0501236	LINC00408	Not Significant
ENSG00000197061	1005.28	1.93792	0.520642	3.72217	0.000197516	0.00389165	H4C3	Enriched
ENSG00000116824	205.434	1.93526	0.277571	6.97212	3.12193e-12	1.23185e-09	CD2	Enriched
ENSG00000230979	10.1799	1.9305	0.724571	2.66433	0.00771421	0.0488458	RPL18AP6	Enriched
ENSG00000181201	16.3503	1.92547	0.570922	3.37255	0.000744747	0.0101776	H2BC27P	Enriched
ENSG00000174123	23.3185	1.92417	0.469337	4.09977	4.13569e-05	0.0012255	TLR10	Enriched
ENSG00000171858	855.877	1.92358	0.546125	3.52223	0.000427932	0.00689195	RPS21	Enriched
ENSG00000270123	43.9361	1.92174	0.637172	3.01605	0.00256091	0.0234709	VTRNA2-1	Enriched
ENSG00000173928	18.1501	1.92005	0.702125	2.73463	0.00624508	0.0427379	SWSAP1	Enriched
ENSG00000141540	255.717	1.91343	0.296004	6.46421	1.01832e-10	2.63252e-08	TTYH2	Enriched
ENSG00000229117	426.313	1.91216	0.513579	3.7232	0.00019671	0.003886	RPL41	Enriched
ENSG00000263740	35.3014	1.90286	0.645963	2.94577	0.00322148	0.0275701	RN7SL4P	Enriched
ENSG00000277775	791.078	1.89841	0.559042	3.39583	0.000684213	0.00963295	H3C7	Enriched
ENSG00000167074	76.848	1.89735	0.356574	5.32104	1.03177e-07	1.08946e-05	TEF	Enriched
ENSG00000101084	63.9261	1.88496	0.58217	3.23782	0.00120446	0.0139673	RAB5IF	Enriched
ENSG00000214026	14.6223	1.87883	0.631638	2.97453	0.00293436	0.0258659	MRPL23	Enriched
ENSG00000188191	95.0837	1.87741	0.494189	3.79898	0.000145295	0.00313912	PRKAR1B	Enriched
ENSG00000172819	76.0282	1.87442	0.392588	4.77452	1.80137e-06	0.000108473	RARG	Enriched
ENSG00000128626	148.3	1.87329	0.581464	3.22167	0.00127445	0.0145704	MRPS12	Enriched
ENSG00000169976	132.141	1.8724	0.551214	3.39687	0.000681606	0.00960527	SF3B5	Enriched
ENSG00000168569	25.2493	1.86713	0.649561	2.87444	0.00404741	0.031991	TMEM223	Enriched
ENSG00000181218	317.679	1.86637	0.4788	3.89801	9.69855e-05	0.00237227	H2AC25	Enriched
ENSG00000182544	77.6704	1.8626	0.590927	3.152	0.00162154	0.0172147	MFSD5	Enriched
ENSG00000113108	13.828	1.86178	0.573248	3.24777	0.00116312	0.0136783	APBB3	Enriched
ENSG00000250479	49.442	1.86121	0.65188	2.85513	0.00430188	0.0332487	CHCHD10	Enriched
ENSG00000226180	21.0058	1.85547	0.551921	3.36184	0.00077426	0.0103912	LOC100129215	Enriched
ENSG00000226360	20.739	1.85015	0.655996	2.82037	0.00479676	0.0359254	RPL10AP6	Enriched
ENSG00000163584	75.5303	1.84907	0.673461	2.74562	0.00603971	0.0420034	RPL22L1	Enriched
ENSG00000109099	54.0605	1.84453	0.362502	5.08832	3.61258e-07	3.00928e-05	PMP22	Enriched
ENSG00000234912	63.8014	1.84053	0.647533	2.84237	0.00447796	0.0342564	SNHG20	Enriched
ENSG00000273542	315.539	1.83248	0.487039	3.7625	0.000168226	0.0034859	H4C12	Enriched
ENSG00000162772	36.2499	1.82367	0.510252	3.57406	0.000351488	0.00595503	ATF3	Enriched
ENSG00000141391	17.3264	1.81785	0.561384	3.23815	0.00120307	0.013962	PRELID3A	Enriched
ENSG00000148204	47.4417	1.80616	0.606875	2.97617	0.00291878	0.0257891	CRB2	Enriched
ENSG00000164587	1440.37	1.80616	0.579994	3.1141	0.0018451	0.0188842	RPS14	Enriched
ENSG00000137460	809.907	1.8048	0.361984	4.98584	6.16944e-07	4.55688e-05	FHDC1	Enriched
ENSG00000107833	270.324	1.80186	0.53101	3.39328	0.000690613	0.00970436	NPM3	Enriched
ENSG00000130255	1024.3	1.8005	0.534989	3.3655	0.00076406	0.0103158	RPL36	Enriched
ENSG00000274997	2202.85	1.79034	0.601948	2.97425	0.00293704	0.0258742	H2AC12	Enriched
ENSG00000277075	1631.25	1.78883	0.437848	4.0855	4.39821e-05	0.00129054	H2AC8	Enriched
ENSG00000137818	1551.78	1.7885	0.507224	3.52606	0.000421789	0.00683709	RPLP1	Enriched
ENSG00000202058	94.5983	1.78681	0.538824	3.31613	0.00091272	0.0116076	RN7SKP80	Enriched
ENSG00000163191	374.049	1.78252	0.479469	3.7177	0.000201045	0.00393021	S100A11	Enriched
ENSG00000275215	499.599	1.77989	0.689534	2.5813	0.0098429	0.0575996	RNA5-8SN3	Not Significant
ENSG00000274641	977.976	1.77612	0.60037	2.95838	0.00309265	0.0267115	H2BC17	Enriched
ENSG00000106803	103.821	1.77146	0.543282	3.26066	0.00111152	0.013273	SEC61B	Enriched
ENSG00000144713	1497.15	1.77115	0.462654	3.82825	0.00012906	0.00290122	RPL32	Enriched
ENSG00000272205	27.7371	1.76996	0.640311	2.76422	0.00570594	0.0404514	POU2F1-DT	Enriched
ENSG00000110031	34.8691	1.7695	0.484384	3.6531	0.000259097	0.0047609	LPXN	Enriched
ENSG00000197958	1332.42	1.76638	0.424833	4.15783	3.21292e-05	0.00102281	RPL12	Enriched
ENSG00000169946	18.6213	1.76266	0.570827	3.0879	0.00201576	0.0199501	ZFPM2	Enriched
ENSG00000288859	50.782	1.76253	0.550642	3.20086	0.00137018	0.0153468	H2AC19	Enriched
ENSG00000164405	130.764	1.76242	0.563148	3.12958	0.00175056	0.018127	UQCRQ	Enriched
ENSG00000158050	86.0277	1.76071	0.628818	2.80003	0.00510986	0.0375596	DUSP2	Enriched
ENSG00000178464	23.8997	1.75592	0.559677	3.13738	0.00170466	0.0178241	RPL10P16	Enriched
ENSG00000213326	12.7007	1.75084	0.641856	2.72778	0.00637622	0.0432994	RPS7P11	Enriched
ENSG00000112306	1159.92	1.74663	0.547527	3.19003	0.00142256	0.0157096	RPS12	Enriched
ENSG00000233927	589.883	1.74477	0.522331	3.34036	0.000836698	0.0109091	RPS28	Enriched
ENSG00000201183	15.7041	1.7441	0.585528	2.97867	0.00289501	0.0256552	RNVU1-3	Enriched
ENSG00000184162	35.0689	1.74031	0.494059	3.52248	0.000427531	0.00689195	NR2C2AP	Enriched
ENSG00000105677	144.308	1.73968	0.510135	3.41023	0.000649089	0.00926898	TMEM147	Enriched
ENSG00000159199	480.078	1.73957	0.485401	3.58378	0.000338659	0.00579663	ATP5MC1	Enriched
ENSG00000160588	300.101	1.73641	0.369077	4.70474	2.54192e-06	0.000146029	MPZL3	Enriched
ENSG00000261136	12.6241	1.7363	0.687638	2.52502	0.0115693	0.0637468	LOC105370941	Not Significant
ENSG00000185130	1580.67	1.73585	0.528362	3.28534	0.00101861	0.0125291	H2BC13	Enriched
ENSG00000202354	42.342	1.73414	0.84541	2.05124	0.0402437	0.143841	RNY3	Not Significant
ENSG00000149646	10.0262	1.73336	0.75362	2.30004	0.0214457	0.0953611	CNBD2	Not Significant
ENSG00000173915	94.2801	1.73148	0.655419	2.6418	0.00824678	0.0513506	ATP5MK	Not Significant
ENSG00000158792	13.0944	1.72794	0.611387	2.82626	0.00470954	0.0354116	SPATA2L	Enriched
ENSG00000198918	240.621	1.72143	0.52292	3.29196	0.000994926	0.0123698	RPL39	Enriched
ENSG00000110104	268.537	1.72061	0.386242	4.45475	8.39893e-06	0.000357766	CCDC86	Enriched
ENSG00000149483	68.9766	1.71903	0.630708	2.72555	0.00641937	0.0434939	TMEM138	Enriched
ENSG00000118231	51.092	1.71696	0.571627	3.00365	0.00266766	0.0242271	CRYGD	Enriched
ENSG00000245205	10.425	1.71668	0.748197	2.29442	0.0217664	0.0962385	EEF1A1P4	Not Significant
ENSG00000131174	206.623	1.71323	0.531971	3.22054	0.00127951	0.0146005	COX7B	Enriched
ENSG00000200913	22.851	1.70905	0.866373	1.97265	0.0485355	0.161223	SNORD46	Not Significant
ENSG00000170291	195.885	1.70603	0.514995	3.3127	0.000923996	0.0117112	ELP5	Enriched
ENSG00000197989	262.973	1.70358	0.632722	2.69247	0.00709259	0.0463584	SNHG12	Enriched
ENSG00000204839	46.2889	1.70326	0.421732	4.03873	5.3741e-05	0.00150012	MROH6	Enriched
ENSG00000278828	934.104	1.70269	0.475643	3.57977	0.000343891	0.0058651	H3C10	Enriched
ENSG00000172366	81.5657	1.70189	0.529868	3.21192	0.0013185	0.0149091	MCRIP2	Enriched
ENSG00000277157	1630.88	1.70185	0.578844	2.94009	0.0032812	0.0278902	H4C4	Enriched
ENSG00000189343	115.894	1.70116	0.470257	3.61751	0.000297456	0.00526995	RPS2P46	Enriched
ENSG00000197915	55.5991	1.70063	0.387686	4.38661	1.15131e-05	0.000455481	HRNR	Enriched
ENSG00000134825	53.292	1.69955	0.5383	3.15726	0.00159261	0.0169841	TMEM258	Enriched
ENSG00000122140	104.376	1.69949	0.447299	3.79945	0.000145016	0.00313762	MRPS2	Enriched
ENSG00000011478	46.5105	1.69901	0.517406	3.28371	0.00102452	0.0125812	QPCTL	Enriched
ENSG00000273802	1569.67	1.69871	0.495604	3.42755	0.000609065	0.00887495	H2BC8	Enriched
ENSG00000197903	2087.32	1.69248	0.519968	3.25497	0.00113404	0.0134205	H2BC12	Enriched
ENSG00000228205	20.2872	1.69151	0.916558	1.8455	0.0649645	0.194272	RPS3P3	Not Significant
ENSG00000167397	42.0745	1.69071	0.522257	3.23732	0.00120658	0.013981	VKORC1	Enriched
ENSG00000119655	16.5937	1.68795	0.629056	2.6833	0.00728997	0.0470943	NPC2	Enriched
ENSG00000162244	1140.58	1.68684	0.468654	3.59932	0.000319049	0.00551767	RPL29	Enriched
ENSG00000138074	793.311	1.6853	0.474187	3.55409	0.000379293	0.00629804	SLC5A6	Enriched
ENSG00000221968	56.3735	1.68511	0.485747	3.46911	0.000522177	0.00804306	FADS3	Enriched
ENSG00000073712	459.52	1.68502	0.362177	4.65249	3.27954e-06	0.000176883	FERMT2	Enriched
ENSG00000198218	49.8987	1.68476	0.589862	2.8562	0.00428748	0.0332336	QRICH1	Enriched
ENSG00000060718	25.8944	1.68374	0.511023	3.29484	0.000984793	0.0122881	COL11A1	Enriched
ENSG00000118181	4430.16	1.67828	0.528764	3.17396	0.00150374	0.0163148	RPS25	Enriched
ENSG00000117410	425.378	1.67163	0.63935	2.61458	0.00893385	0.0540792	ATP6V0B	Not Significant
ENSG00000105258	28.2075	1.67031	0.45063	3.70661	0.000210052	0.00404302	POLR2I	Enriched
ENSG00000101194	154.455	1.66985	0.400917	4.16508	3.11241e-05	0.00100577	SLC17A9	Enriched
ENSG00000284753	26.9105	1.66675	0.633554	2.6308	0.00851848	0.0523468	EEF1AKMT4	Not Significant
ENSG00000184076	126.72	1.66184	0.509099	3.26427	0.00109745	0.0131747	UQCR10	Enriched
ENSG00000143631	169.113	1.66178	0.371549	4.47257	7.72863e-06	0.00033687	FLG	Enriched
ENSG00000123095	85.9611	1.66057	0.426587	3.8927	9.91364e-05	0.00241699	BHLHE41	Enriched
ENSG00000074071	178.048	1.65888	0.429147	3.86554	0.000110845	0.00260912	MRPS34	Enriched
ENSG00000147123	97.6528	1.65746	0.432335	3.83374	0.00012621	0.00285879	NDUFB11	Enriched
ENSG00000244165	209.249	1.65515	0.374049	4.42497	9.64565e-06	0.000398421	P2RY11	Enriched
ENSG00000162910	62.2191	1.65355	0.547902	3.01797	0.00254474	0.0233992	MRPL55	Enriched
ENSG00000063177	2356.58	1.65228	0.503407	3.28219	0.00103005	0.0126387	RPL18	Enriched
ENSG00000167515	164.918	1.65167	0.536464	3.0788	0.00207835	0.0203634	TRAPPC2L	Enriched
ENSG00000186501	155.899	1.65024	0.474469	3.47808	0.000505028	0.00782272	TMEM222	Enriched
ENSG00000226221	46.52	1.64932	0.539693	3.05603	0.00224285	0.0213927	RPL26P19	Enriched
ENSG00000196747	1878.26	1.64908	0.522705	3.1549	0.00160551	0.0170852	H2AC13	Enriched
ENSG00000163156	161.043	1.64489	0.474569	3.46607	0.000528128	0.00809689	SCNM1	Enriched
ENSG00000105193	2212.83	1.64301	0.449118	3.65831	0.000253886	0.00468814	RPS16	Enriched
ENSG00000203814	1237.22	1.64252	0.542245	3.02912	0.00245271	0.0228564	H2BC18	Enriched
ENSG00000184344	11.8229	1.63991	0.945684	1.7341	0.082901	0.22704	GDF3	Not Significant
ENSG00000111678	85.6077	1.63868	0.562834	2.91148	0.00359716	0.0296091	C12orf57	Enriched
ENSG00000184990	70.3678	1.63825	0.747175	2.19259	0.028337	0.114252	SIVA1	Not Significant
ENSG00000129521	140.61	1.63398	0.270787	6.03419	1.59765e-09	2.99439e-07	EGLN3	Enriched
ENSG00000130312	92.4865	1.63262	0.549252	2.97244	0.00295447	0.0259667	MRPL34	Enriched
ENSG00000171863	1875.1	1.63261	0.461548	3.53724	0.000404335	0.00662585	RPS7	Enriched
ENSG00000236801	11.368	1.63198	0.768147	2.12457	0.0336226	0.127565	RPL24P8	Not Significant
ENSG00000267858	14.3017	1.63144	0.643396	2.53568	0.0112229	0.0623941	MZF1-AS1	Not Significant
ENSG00000121361	179.635	1.62669	0.473707	3.43397	0.00059482	0.00874167	KCNJ8	Enriched
ENSG00000172809	1143.73	1.62434	0.441895	3.67586	0.000237051	0.00446112	RPL38	Enriched
ENSG00000173621	154.667	1.62134	0.472248	3.43323	0.000596428	0.00874683	LRFN4	Enriched
ENSG00000143333	214.031	1.6179	0.329079	4.91644	8.81316e-07	6.06167e-05	RGS16	Enriched
ENSG00000189056	1822.83	1.61564	0.545079	2.96405	0.00303615	0.0262993	RELN	Enriched
ENSG00000177700	116.558	1.61339	0.46559	3.46526	0.000529728	0.00810483	POLR2L	Enriched
ENSG00000005073	74.0118	1.60715	0.321088	5.00531	5.57719e-07	4.26655e-05	HOXA11	Enriched
ENSG00000230291	32.9826	1.60598	0.495738	3.23957	0.00119709	0.0139357	RPL26P32	Enriched
ENSG00000186352	11.6439	1.60593	0.687362	2.33636	0.0194725	0.0896508	ANKRD37	Not Significant
ENSG00000228071	16.8294	1.60482	0.746197	2.15067	0.0315026	0.12218	RPL7P47	Not Significant
ENSG00000105640	1095.5	1.60297	0.430823	3.7207	0.000198671	0.00390928	RPL18A	Enriched
ENSG00000231500	2900.78	1.60032	0.502406	3.18532	0.00144596	0.0158717	RPS18	Enriched
ENSG00000275126	1548.23	1.59941	0.672749	2.37743	0.017434	0.0839182	H4C13	Not Significant
ENSG00000275713	1195.02	1.59642	0.50643	3.15229	0.00161994	0.0172143	H2BC9	Enriched
ENSG00000142534	4389.52	1.59587	0.467963	3.41024	0.000649052	0.00926898	RPS11	Enriched
ENSG00000163882	187.091	1.59403	0.490419	3.25034	0.00115265	0.0135872	POLR2H	Enriched
ENSG00000169429	247.533	1.59316	1.43951	1.10674	0.268405	0.47241	CXCL8	Not Significant
ENSG00000200816	19.4906	1.59153	0.863123	1.84393	0.065194	0.194803	SNORA38	Not Significant
ENSG00000196787	1008.2	1.58867	0.45135	3.51981	0.000431853	0.00694019	H2AC11	Enriched
ENSG00000125505	646.167	1.58441	0.411258	3.8526	0.000116872	0.00271266	MBOAT7	Enriched
ENSG00000239039	123.103	1.58061	0.708302	2.23155	0.0256447	0.107061	SNORD13	Not Significant
ENSG00000243199	46.4461	1.57975	0.590009	2.6775	0.00741728	0.0475887	RPL6P10	Enriched
ENSG00000261221	240.904	1.57634	0.352775	4.4684	7.88061e-06	0.000342498	ZNF865	Enriched
ENSG00000126756	88.3542	1.57487	0.473975	3.32269	0.000891528	0.0113961	UXT	Enriched
ENSG00000105364	579.411	1.57396	0.472986	3.32772	0.000875591	0.0112781	MRPL4	Enriched
ENSG00000100258	88.8799	1.57268	0.458503	3.43003	0.000603518	0.00881983	LMF2	Enriched
ENSG00000175040	2408.57	1.57249	0.432272	3.63774	0.000275042	0.00499876	CHST2	Enriched
ENSG00000144043	261.877	1.57164	0.486174	3.23266	0.00122644	0.0141565	TEX261	Enriched
ENSG00000197694	1400.35	1.57068	0.486889	3.22594	0.00125559	0.0144484	SPTAN1	Enriched
ENSG00000164056	291.102	1.56748	0.279902	5.60012	2.14206e-08	2.84719e-06	SPRY1	Enriched
ENSG00000186197	217.527	1.56563	0.294003	5.32524	1.00822e-07	1.07215e-05	EDARADD	Enriched
ENSG00000156411	156.494	1.56149	0.515169	3.03103	0.00243723	0.0227263	ATP5MJ	Enriched
ENSG00000112759	566.76	1.5603	0.514084	3.03511	0.00240451	0.0225051	SLC29A1	Enriched
ENSG00000109475	650.121	1.55866	0.522362	2.98387	0.00284631	0.0253597	RPL34	Enriched
ENSG00000110700	998.222	1.55807	0.55207	2.82223	0.00476907	0.0357716	RPS13	Enriched
ENSG00000196890	355.196	1.55643	0.401724	3.87438	0.000106897	0.00255224	H2BC26	Enriched
ENSG00000101464	236.07	1.55347	0.344234	4.51283	6.39679e-06	0.000295118	PIGU	Enriched
ENSG00000124635	780.792	1.55328	0.461105	3.3686	0.000755499	0.0102515	H2BC11	Enriched
ENSG00000241468	178.581	1.55106	0.534661	2.90101	0.00371963	0.0303604	ATP5MF	Enriched
ENSG00000235750	20047.2	1.54969	0.344743	4.49519	6.95064e-06	0.000312967	KIAA0040	Enriched
ENSG00000197728	900.705	1.5492	0.528163	2.93319	0.00335502	0.0282972	RPS26	Enriched
ENSG00000108828	782.336	1.54762	0.281745	5.49299	3.95176e-08	4.93772e-06	VAT1	Enriched
ENSG00000213442	53.5618	1.54619	0.529246	2.92149	0.00348363	0.0290671	RPL18AP3	Enriched
ENSG00000266402	15.9496	1.54524	0.776127	1.99096	0.0464857	0.156946	SNHG25	Not Significant
ENSG00000135185	22.3477	1.54448	0.482093	3.20369	0.00135678	0.0152501	TMEM243	Enriched
ENSG00000142937	5011.76	1.54353	0.556736	2.77246	0.0055635	0.0396667	RPS8	Enriched
ENSG00000143224	102.221	1.54303	0.375163	4.11296	3.9061e-05	0.00116883	PPOX	Enriched
ENSG00000206633	15.5992	1.54278	0.855859	1.80261	0.0714492	0.206219	SNORA80B	Not Significant
ENSG00000180879	108.948	1.53824	0.607281	2.533	0.0113092	0.0627109	SSR4	Not Significant
ENSG00000105671	205.227	1.53249	0.341782	4.48381	7.33209e-06	0.000322378	DDX49	Enriched
ENSG00000148343	74.854	1.53205	0.39419	3.88659	0.000101662	0.00245463	MIGA2	Enriched
ENSG00000198242	438.447	1.53172	0.46227	3.31347	0.000921445	0.0116888	RPL23A	Enriched
ENSG00000099624	212.564	1.53041	0.425286	3.59855	0.000320002	0.00552142	ATP5F1D	Enriched
ENSG00000083845	2308.89	1.52979	0.384988	3.9736	7.07935e-05	0.00186637	RPS5	Enriched
ENSG00000243449	8.5885	1.52943	0.760154	2.012	0.04422	NA	NICOL1	Not Significant
ENSG00000131469	1241.15	1.52886	0.537593	2.8439	0.00445647	0.0341364	RPL27	Enriched
ENSG00000108622	66.3755	1.52675	0.485369	3.14555	0.00165775	0.0174186	ICAM2	Enriched
ENSG00000166166	201.844	1.52592	0.415581	3.67179	0.000240859	0.00451995	TRMT61A	Enriched
ENSG00000118777	50.3584	1.52567	0.498315	3.06167	0.00220109	0.0210883	ABCG2	Enriched
ENSG00000197774	32.1125	1.52499	0.517146	2.94886	0.00318944	0.0274368	EME2	Enriched
ENSG00000143198	59.9765	1.52312	0.545187	2.79376	0.00520987	0.0380362	MGST3	Enriched
ENSG00000167526	1695.34	1.52241	0.470532	3.23551	0.00121426	0.0140592	RPL13	Enriched
ENSG00000112695	189.825	1.52171	0.475183	3.20236	0.00136306	0.0152976	COX7A2	Enriched
ENSG00000199568	2035.69	1.52115	0.869604	1.74925	0.0802476	0.222368	RNU5A-1	Not Significant
ENSG00000176058	66.8181	1.52079	0.537797	2.82782	0.00468663	0.03533	TPRN	Enriched
ENSG00000136247	75.3519	1.5201	0.546603	2.78099	0.00541938	0.0390468	ZDHHC4	Enriched
ENSG00000075826	20.9668	1.5188	0.556825	2.7276	0.00637969	0.0433033	SEC31B	Enriched
ENSG00000155252	175.961	1.51861	0.268964	5.64614	1.64087e-08	2.34317e-06	PI4K2A	Enriched
ENSG00000163170	33.7152	1.5181	0.751185	2.02094	0.0432859	0.150692	BOLA3	Not Significant
ENSG00000229941	31.0795	1.51612	0.707262	2.14365	0.0320613	0.123707	PDE11A-AS1	Not Significant
ENSG00000221983	838.986	1.51538	0.393676	3.8493	0.000118456	0.00274095	UBA52	Enriched
ENSG00000169047	22.0751	1.51424	0.524698	2.88592	0.00390271	0.0313094	IRS1	Enriched
ENSG00000200156	737.131	1.51321	0.800336	1.89072	0.0586616	0.182063	RNU5B-1	Not Significant
ENSG00000188566	143.263	1.51078	0.352509	4.28581	1.82077e-05	0.000651568	NDOR1	Enriched
ENSG00000240376	597.146	1.5091	0.45748	3.29872	0.000971272	0.0121643	RPS8P8	Enriched
ENSG00000074582	204.297	1.50617	0.364097	4.13672	3.52301e-05	0.00109366	BCS1L	Enriched
ENSG00000204335	26.6419	1.50523	0.448954	3.35276	0.000800108	0.0105328	SP5	Enriched
ENSG00000157734	112.887	1.50443	0.673205	2.23473	0.0254354	0.10656	SNX22	Not Significant
ENSG00000174276	17.2301	1.50442	0.602348	2.4976	0.0125039	0.0670333	ZNHIT2	Not Significant
ENSG00000105372	2160.61	1.50229	0.504351	2.97865	0.00289524	0.0256552	RPS19	Enriched
ENSG00000197837	64.8243	1.50151	0.34692	4.32811	1.50392e-05	0.000565158	H4C16	Enriched
ENSG00000148291	85.131	1.50137	0.525372	2.85773	0.00426684	0.0330972	SURF2	Enriched
ENSG00000167523	16.1607	1.50013	0.692436	2.16645	0.0302768	0.119215	SPATA33	Not Significant
ENSG00000232956	186.781	1.49796	0.53361	2.80723	0.00499698	0.0368906	SNHG15	Enriched
ENSG00000108107	2561.13	1.49552	0.412286	3.62739	0.000286304	0.00513498	RPL28	Enriched
ENSG00000136149	61.4936	1.49387	0.498865	2.99454	0.00274856	0.0247257	RPL13AP25	Enriched
ENSG00000263961	13.248	1.4917	0.650618	2.29274	0.021863	0.0964726	RHEX	Not Significant
ENSG00000136942	1300.32	1.49153	0.456874	3.26463	0.00109607	0.0131747	RPL35	Enriched
ENSG00000177595	61.5149	1.49124	0.362219	4.11697	3.83893e-05	0.0011605	PIDD1	Enriched
ENSG00000248487	23.9037	1.49046	0.64093	2.32546	0.0200473	0.091637	ABHD14A	Not Significant
ENSG00000125743	399.288	1.48921	0.508031	2.93134	0.00337498	0.0283935	SNRPD2	Enriched
ENSG00000239672	379.52	1.48886	0.392805	3.79034	0.000150444	0.00321791	NME1	Enriched
ENSG00000277224	923.123	1.48885	0.532104	2.79804	0.00514145	0.0377711	H2BC7	Enriched
ENSG00000160959	202.101	1.48753	0.341369	4.35753	1.31536e-05	0.000508311	LRRC14	Enriched
ENSG00000066322	466.983	1.48547	0.387486	3.8336	0.000126281	0.00285879	ELOVL1	Enriched
ENSG00000136235	11.6351	1.48382	0.696068	2.13172	0.0330297	0.126085	GPNMB	Not Significant
ENSG00000161970	537.388	1.48311	0.483121	3.06986	0.00214157	0.0207567	RPL26	Enriched
ENSG00000146066	111.265	1.48107	0.450039	3.29097	0.000998412	0.0123925	HIGD2A	Enriched
ENSG00000198258	374.958	1.48096	0.558819	2.65016	0.00804539	0.0503685	UBL5	Not Significant
ENSG00000166002	27.5098	1.47891	0.562058	2.63124	0.0085075	0.0523007	SMCO4	Not Significant
ENSG00000293495	188.304	1.47839	0.496939	2.975	0.00292992	0.0258419	C19orf48P	Enriched
ENSG00000102119	135.808	1.47789	0.42173	3.50434	0.000457743	0.00725518	EMD	Enriched
ENSG00000112514	484.534	1.47788	0.435615	3.39262	0.000692269	0.00970436	CUTA	Enriched
ENSG00000160753	182.011	1.47745	0.476274	3.10209	0.00192157	0.0192881	RUSC1	Enriched
ENSG00000234741	2450.46	1.47738	0.433866	3.40515	0.000661275	0.00939825	GAS5	Enriched
ENSG00000197345	145.699	1.47719	0.509667	2.89834	0.00375147	0.0305372	MRPL21	Enriched
ENSG00000177954	2273.94	1.47487	0.435776	3.38448	0.000713136	0.0099007	RPS27	Enriched
ENSG00000240950	26.1519	1.47449	0.50274	2.93291	0.00335806	0.0282972	RPL8P3	Enriched
ENSG00000174365	102.009	1.47421	0.605826	2.4334	0.0149579	0.0756167	SNHG11	Not Significant
ENSG00000102901	89.4294	1.47262	0.391565	3.76086	0.000169329	0.00349233	CENPT	Enriched
ENSG00000115268	1067.4	1.47229	0.435828	3.37815	0.000729743	0.0100383	RPS15	Enriched
ENSG00000198755	3216.99	1.47111	0.471691	3.1188	0.00181589	0.0186234	RPL10A	Enriched
ENSG00000150991	4011.69	1.46922	0.314506	4.67151	2.9899e-06	0.000166656	UBC	Enriched
ENSG00000178449	61.4797	1.46882	0.575513	2.55219	0.0107047	0.0605228	COX14	Not Significant
ENSG00000130204	1015.73	1.467	0.342415	4.28428	1.83333e-05	0.0006545	TOMM40	Enriched
ENSG00000260260	18.7736	1.46651	0.957162	1.53215	0.125486	0.294727	SNHG19	Not Significant
ENSG00000116521	331.989	1.46548	0.38494	3.80704	0.000140642	0.00309321	SCAMP3	Enriched
ENSG00000213621	17.3782	1.46342	0.603925	2.42318	0.0153853	0.0768702	RPSAP54	Not Significant
ENSG00000170906	104.492	1.46154	0.433561	3.371	0.000748956	0.010209	NDUFA3	Enriched
ENSG00000183598	455.625	1.4614	0.530758	2.75343	0.00589747	0.0412245	H3C13	Enriched
ENSG00000196427	11.3795	1.45995	0.668151	2.18506	0.0288847	0.115616	NBPF4	Not Significant
ENSG00000182154	72.8595	1.4575	0.527318	2.76399	0.00570986	0.0404538	MRPL41	Enriched
ENSG00000167920	33.147	1.45719	0.470825	3.09497	0.00196831	0.0196229	KRT10-AS1	Enriched
ENSG00000187741	263.261	1.45712	0.268861	5.41959	5.97353e-08	7.01469e-06	FANCA	Enriched
ENSG00000116649	1704.1	1.45665	0.494416	2.9462	0.00321703	0.0275488	SRM	Enriched
ENSG00000241945	105.542	1.45663	0.504374	2.88799	0.00387708	0.0311872	PWP2	Enriched
ENSG00000099795	248.559	1.45634	0.412852	3.5275	0.000419498	0.00680731	NDUFB7	Enriched
ENSG00000234797	13.4122	1.45563	0.62951	2.31232	0.0207603	0.0934811	RPS3AP6	Not Significant
ENSG00000228474	65.7445	1.4545	0.71876	2.02362	0.0430095	0.150043	OST4	Not Significant
ENSG00000169100	2131.04	1.45361	0.386293	3.76296	0.000167911	0.0034859	SLC25A6	Enriched
ENSG00000219773	13.1908	1.45343	0.620064	2.34401	0.0190778	0.0885359	RPSAP45	Not Significant
ENSG00000167700	39.0951	1.45266	0.510599	2.845	0.00444111	0.0340614	MFSD3	Enriched
ENSG00000177600	1162.35	1.45214	0.396581	3.66164	0.000250605	0.00463897	RPLP2	Enriched
ENSG00000089009	5351.19	1.45077	0.471233	3.07867	0.00207926	0.0203634	RPL6	Enriched
ENSG00000179886	146.32	1.4475	0.320454	4.51705	6.27086e-06	0.000292004	TIGD5	Enriched
ENSG00000179958	225.252	1.44661	0.52389	2.76129	0.00575735	0.0405657	DCTPP1	Enriched
ENSG00000254858	42.7531	1.44625	0.415527	3.48053	0.000500424	0.00777808	MPV17L2	Enriched
ENSG00000033011	98.892	1.44552	0.394424	3.6649	0.00024744	0.00459741	ALG1	Enriched
ENSG00000115289	57.1426	1.44539	0.457359	3.16029	0.00157613	0.0168924	PCGF1	Enriched
ENSG00000182117	288.686	1.44476	0.611214	2.36376	0.0180907	0.0860571	NOP10	Not Significant
ENSG00000176454	142.551	1.44437	0.442686	3.26273	0.00110344	0.0132148	LPCAT4	Enriched
ENSG00000167113	49.7201	1.443	0.565604	2.55125	0.0107338	0.0605732	COQ4	Not Significant
ENSG00000266472	377.548	1.43986	0.441363	3.2623	0.00110513	0.0132245	MRPS21	Enriched
ENSG00000179091	1129.93	1.43639	0.382921	3.75114	0.000176033	0.00359596	CYC1	Enriched
ENSG00000188807	382.796	1.43532	0.439243	3.26772	0.00108417	0.0130833	TMEM201	Enriched
ENSG00000074842	195.252	1.43517	0.428254	3.35121	0.000804588	0.0105639	MYDGF	Enriched
ENSG00000162650	88.1297	1.43507	0.424884	3.37756	0.00073132	0.0100508	ATXN7L2	Enriched
ENSG00000161980	153.538	1.43287	0.483161	2.96561	0.00302081	0.026227	POLR3K	Enriched
ENSG00000263266	183.365	1.43276	0.448483	3.19467	0.00139989	0.0155597	RPS7P1	Enriched
ENSG00000143543	100.85	1.43229	0.569069	2.51689	0.0118394	0.0647413	JTB	Not Significant
ENSG00000106245	67.6054	1.43147	0.49745	2.87762	0.00400692	0.031802	BUD31	Enriched
ENSG00000140398	24.6599	1.43128	0.481782	2.97081	0.00297012	0.0260432	NEIL1	Enriched
ENSG00000267260	18.8441	1.43009	0.522054	2.73935	0.00615601	0.0424383	LOC728485	Enriched
ENSG00000255468	13.5731	1.42962	0.564569	2.53223	0.011334	0.0628018	B4GAT1-DT	Not Significant
ENSG00000227939	37.5618	1.42869	0.435842	3.27801	0.00104543	0.0127776	RPL3P2	Enriched
ENSG00000173113	358.937	1.42382	0.615328	2.31392	0.0206722	0.0933201	TRMT112	Not Significant
ENSG00000278705	3256.46	1.42136	0.498313	2.85235	0.00433975	0.0334379	H4C2	Enriched
ENSG00000186815	76.5192	1.4212	0.391965	3.62584	0.000288029	0.00515418	TPCN1	Enriched
ENSG00000204588	11.3292	1.42103	0.879368	1.61597	0.1061	0.264132	LINC01123	Not Significant
ENSG00000175756	361.859	1.41866	0.544893	2.60355	0.00922631	0.0553578	AURKAIP1	Not Significant
ENSG00000103363	142.169	1.41695	0.502689	2.81875	0.0048211	0.0360357	ELOB	Enriched
ENSG00000142541	8650.2	1.41645	0.453734	3.12176	0.00179771	0.0185055	RPL13A	Enriched
ENSG00000167604	33.6731	1.41556	0.634874	2.22967	0.0257693	0.107329	NFKBID	Not Significant
ENSG00000136933	142.38	1.41534	0.477104	2.96652	0.00301191	0.0261952	RABEPK	Enriched
ENSG00000196549	22.1737	1.41402	0.515789	2.74146	0.00611662	0.0422865	MME	Enriched
ENSG00000117118	708.169	1.41384	0.483258	2.92564	0.00343751	0.0287783	SDHB	Enriched
ENSG00000117691	161.362	1.41344	0.520965	2.71312	0.00666533	0.0445564	NENF	Enriched
ENSG00000108298	5914.71	1.40968	0.454453	3.10193	0.00192264	0.0192881	RPL19	Enriched
ENSG00000050426	421.288	1.40881	0.247247	5.698	1.21222e-08	1.83596e-06	LETMD1	Enriched
ENSG00000176340	186.67	1.40852	0.499878	2.81773	0.00483652	0.0361329	COX8A	Enriched
ENSG00000037241	56.5657	1.40786	0.707065	1.99113	0.0464663	0.156918	RPL26L1	Not Significant
ENSG00000198563	213.521	1.40752	0.467763	3.00906	0.00262061	0.0238865	DDX39B	Enriched
ENSG00000270882	90.2625	1.40496	0.438671	3.20277	0.00136115	0.0152877	H4C14	Enriched
ENSG00000068001	94.2518	1.40489	0.585336	2.40015	0.0163883	0.0804602	HYAL2	Not Significant
ENSG00000242125	454.73	1.40455	0.544666	2.57874	0.00991611	0.0579033	SNHG3	Not Significant
ENSG00000265681	30.6191	1.40402	0.801322	1.75213	0.0797506	0.221482	RPL17	Not Significant
ENSG00000224189	14.5033	1.40384	0.544932	2.57617	0.00999009	0.0581363	HAGLR	Not Significant
ENSG00000165233	50.4642	1.4024	0.604913	2.31835	0.0204301	0.0926762	CARD19	Not Significant
ENSG00000158716	105.742	1.40183	0.609369	2.30047	0.0214218	0.0953112	DUSP23	Not Significant
ENSG00000170684	115.694	1.40149	0.404715	3.46291	0.000534361	0.00811775	ZNF296	Enriched
ENSG00000278619	173.063	1.40118	0.262213	5.34367	9.10832e-08	9.89639e-06	MRM1	Enriched
ENSG00000182087	211.93	1.40075	0.476711	2.93837	0.00329945	0.0280136	TMEM259	Enriched
ENSG00000172336	67.3988	1.3995	0.544095	2.57216	0.0101066	0.0584416	POP7	Not Significant
ENSG00000134419	430.529	1.3993	0.386184	3.62341	0.000290748	0.00517621	RPS15A	Enriched
ENSG00000104979	193.1	1.39901	0.596151	2.34673	0.0189389	0.088162	C19orf53	Not Significant
ENSG00000163682	3100.99	1.39542	0.420536	3.31821	0.000905976	0.0115414	RPL9	Enriched
ENSG00000172270	640.68	1.39542	0.381736	3.65545	0.00025673	0.004729	BSG	Enriched
ENSG00000254999	523.741	1.39455	0.590646	2.36106	0.0182225	0.0863509	BRK1	Not Significant
ENSG00000168890	19.1296	1.39403	0.572645	2.43438	0.0149175	0.0754632	TMEM150A	Not Significant
ENSG00000182858	36.2897	1.39371	0.422524	3.29854	0.000971908	0.0121643	ALG12	Enriched
ENSG00000146828	75.0013	1.39357	0.512674	2.71823	0.00656318	0.0440897	SLC12A9	Enriched
ENSG00000204397	23.6035	1.39348	0.456155	3.05483	0.00225188	0.021464	CARD16	Enriched
ENSG00000183793	15.6253	1.39324	0.559626	2.4896	0.0127887	0.0681649	NPIPA5	Not Significant
ENSG00000238835	15.0732	1.39197	0.887194	1.56895	0.116658	0.28208	SCARNA18	Not Significant
ENSG00000171425	88.0161	1.39189	0.406909	3.42064	0.00062473	0.00899292	ZNF581	Enriched
ENSG00000173653	68.6562	1.39035	0.362697	3.83335	0.000126409	0.00285879	RCE1	Enriched
ENSG00000275379	1394.33	1.38988	0.390904	3.55556	0.000377174	0.00628372	H3C11	Enriched
ENSG00000204628	3331.82	1.38855	0.33551	4.13864	3.49376e-05	0.00108684	RACK1	Enriched
ENSG00000115604	465.818	1.38798	0.295719	4.69358	2.68459e-06	0.000152473	IL18R1	Enriched
ENSG00000127419	37.2822	1.38643	0.458911	3.02113	0.00251835	0.0232656	TMEM175	Enriched
ENSG00000167996	751.267	1.38606	0.470401	2.94654	0.00321347	0.0275488	FTH1	Enriched
ENSG00000017483	369.067	1.38596	0.501856	2.76167	0.00575058	0.0405657	SLC38A5	Enriched
ENSG00000238103	12.9051	1.38545	0.676549	2.04783	0.040577	0.144516	RPL9P7	Not Significant
ENSG00000148459	223.887	1.38512	0.344137	4.0249	5.69992e-05	0.00156664	PDSS1	Enriched
ENSG00000182173	351.054	1.38342	0.371649	3.72238	0.000197358	0.00389165	TSEN54	Enriched
ENSG00000217930	12.4236	1.38325	0.598493	2.31123	0.0208202	0.0936066	PAM16	Not Significant
ENSG00000171421	85.5335	1.38187	0.47419	2.91418	0.00356626	0.0295102	MRPL36	Enriched
ENSG00000100564	60.0956	1.37965	0.481903	2.86292	0.00419751	0.0326948	PIGH	Enriched
ENSG00000160688	175.428	1.37931	0.437893	3.14987	0.00163344	0.0172599	FLAD1	Enriched
ENSG00000121966	49.5658	1.37909	0.596565	2.31172	0.0207932	0.0935156	CXCR4	Not Significant
ENSG00000160949	812.045	1.3789	0.26484	5.20654	1.92393e-07	1.79166e-05	TONSL	Enriched
ENSG00000205250	543.016	1.37671	0.480675	2.86412	0.00418165	0.0326051	E2F4	Enriched
ENSG00000197586	233.837	1.37622	0.327833	4.19794	2.69348e-05	0.000896539	ENTPD6	Enriched
ENSG00000104529	397.094	1.37566	0.300787	4.57356	4.79516e-06	0.000237289	EEF1D	Enriched
ENSG00000104886	182.415	1.37432	0.534009	2.57359	0.0100651	0.0582967	PLEKHJ1	Not Significant
ENSG00000214160	248.065	1.37416	0.44295	3.1023	0.00192023	0.0192881	ALG3	Enriched
ENSG00000163462	31.273	1.37127	0.411253	3.33439	0.000854882	0.0110806	TRIM46	Enriched
ENSG00000147403	1513.4	1.36974	0.50128	2.73249	0.00628568	0.0429178	RPL10	Enriched
ENSG00000108465	20.2757	1.3685	0.577887	2.36811	0.0178793	0.0854583	CDK5RAP3	Not Significant
ENSG00000178381	30.288	1.3678	0.465943	2.93555	0.00332955	0.0281575	ZFAND2A	Enriched
ENSG00000142330	115.755	1.36563	0.385051	3.54661	0.000390221	0.00642964	CAPN10	Enriched
ENSG00000111012	19.6248	1.36473	0.480871	2.83805	0.00453908	0.0345652	CYP27B1	Enriched
ENSG00000182899	1419.37	1.36428	0.441782	3.08812	0.00201429	0.0199486	RPL35A	Enriched
ENSG00000212464	21.3971	1.36288	0.672648	2.02614	0.0427505	0.149417	SNORA12	Not Significant
ENSG00000234289	13.7366	1.36145	0.698241	1.94982	0.0511974	0.166556	H2BC12L	Not Significant
ENSG00000008988	2565.41	1.35984	0.42918	3.16846	0.00153248	0.0165547	RPS20	Enriched
ENSG00000242372	430.363	1.35865	0.426164	3.18808	0.00143219	0.0157899	EIF6	Enriched
ENSG00000174917	94.2623	1.35857	0.481945	2.81893	0.0048184	0.0360335	MICOS13	Enriched
ENSG00000162066	24.0676	1.3578	0.466372	2.91142	0.00359796	0.0296091	AMDHD2	Enriched
ENSG00000088986	233.585	1.3576	0.597937	2.27048	0.0231786	0.10004	DYNLL1	Not Significant
ENSG00000160193	750.937	1.35734	0.257939	5.26223	1.42316e-07	1.46157e-05	WDR4	Enriched
ENSG00000090432	190.507	1.35723	0.359218	3.77828	0.000157917	0.00333965	MUL1	Enriched
ENSG00000171067	192.44	1.35718	0.393743	3.44688	0.000567099	0.00839396	C11orf24	Enriched
ENSG00000174177	122.65	1.35715	0.389458	3.4847	0.000492687	0.00768714	CTU2	Enriched
ENSG00000109084	669.989	1.35614	0.347783	3.89938	9.64381e-05	0.00236273	TMEM97	Enriched
ENSG00000008382	28.1039	1.35313	0.516611	2.61926	0.0088122	0.053646	MPND	Not Significant
ENSG00000189306	479.142	1.35297	0.312427	4.33051	1.48762e-05	0.000561849	RRP7A	Enriched
ENSG00000122678	88.1181	1.35214	0.309238	4.37249	1.22836e-05	0.000479636	POLM	Enriched
ENSG00000163479	459.44	1.35168	0.332987	4.05926	4.92295e-05	0.00141398	SSR2	Enriched
ENSG00000071073	630.82	1.35064	0.301267	4.4832	7.35316e-06	0.000322378	MGAT4A	Enriched
ENSG00000108375	34.9922	1.35007	0.40204	3.35805	0.000784952	0.0104212	RNF43	Enriched
ENSG00000119986	24.365	1.34968	0.446739	3.02118	0.00251791	0.0232656	AVPI1	Enriched
ENSG00000148655	16.3005	1.34905	0.685498	1.96798	0.0490699	0.162239	LRMDA	Not Significant
ENSG00000224383	14.7957	1.3478	0.750395	1.79613	0.0724744	0.208376	PRR29	Not Significant
ENSG00000150990	985.024	1.34753	0.245999	5.4778	4.30639e-08	5.33636e-06	DHX37	Enriched
ENSG00000148985	115.627	1.34457	0.353029	3.80866	0.000139723	0.00308095	PGAP2	Enriched
ENSG00000179431	83.0712	1.3441	0.544351	2.46918	0.0135424	0.0709731	FJX1	Not Significant
ENSG00000225357	14.6754	1.34392	0.539047	2.49314	0.0126617	0.0677311	RPF2P1	Not Significant
ENSG00000148399	74.6996	1.34385	0.392045	3.4278	0.000608499	0.00887495	DPH7	Enriched
ENSG00000055950	133.882	1.34244	0.490031	2.73951	0.0061531	0.0424377	MRPL43	Enriched
ENSG00000238045	10.7023	1.34184	0.649156	2.06705	0.0387298	0.140371	MVP-DT	Not Significant
ENSG00000169020	138.052	1.3402	0.522033	2.56727	0.0102502	0.0589758	ATP5ME	Not Significant
ENSG00000177830	246.112	1.33979	0.483074	2.77347	0.00554618	0.0395997	CHID1	Enriched
ENSG00000262814	137.379	1.3393	0.608475	2.20107	0.0277308	0.112865	MRPL12	Not Significant
ENSG00000070423	195.593	1.33928	0.540757	2.47667	0.0132615	0.0698182	RNF126	Not Significant
ENSG00000145217	14.9967	1.33774	0.560257	2.38772	0.0169532	0.082344	SLC26A1	Not Significant
ENSG00000233954	138.524	1.33709	0.454037	2.94489	0.00323068	0.0276016	UQCRHL	Enriched
ENSG00000089157	5185.77	1.33664	0.397688	3.36102	0.000776539	0.0104046	RPLP0	Enriched
ENSG00000213339	106.091	1.33601	0.341357	3.91382	9.08461e-05	0.0022627	QTRT1	Enriched
ENSG00000276410	1405.98	1.33493	0.418639	3.18874	0.00142896	0.0157659	H2BC3	Enriched
ENSG00000165661	293.785	1.33469	0.249649	5.34629	8.97769e-08	9.82566e-06	QSOX2	Enriched
ENSG00000013306	473.859	1.33438	0.492475	2.70953	0.00673783	0.0447962	SLC25A39	Enriched
ENSG00000176978	218.116	1.33429	0.453659	2.94117	0.00326977	0.0278404	DPP7	Enriched
ENSG00000158373	2290.02	1.33266	0.382402	3.48497	0.000492195	0.00768714	H2BC5	Enriched
ENSG00000149806	671.575	1.33224	0.489405	2.72216	0.0064856	0.043745	FAU	Enriched
ENSG00000135390	1191.3	1.33172	0.514165	2.59006	0.00959585	0.0567127	ATP5MC2	Not Significant
ENSG00000215845	14.3558	1.3317	0.719443	1.85102	0.064167	0.192891	TSTD1	Not Significant
ENSG00000115307	829.076	1.3315	0.46469	2.86535	0.00416545	0.0325585	AUP1	Enriched
ENSG00000130332	157.016	1.32986	0.489458	2.717	0.00658758	0.0442338	LSM7	Enriched
ENSG00000147799	33.6386	1.32985	0.409236	3.24959	0.00115572	0.0136126	ARHGAP39	Enriched
ENSG00000124172	156.573	1.32976	0.561511	2.36818	0.0178758	0.0854583	ATP5F1E	Not Significant
ENSG00000128965	66.6375	1.32881	0.607668	2.18674	0.0287614	0.115418	CHAC1	Not Significant
ENSG00000232573	654.484	1.32879	0.319454	4.15957	3.1885e-05	0.00102155	RPL3P4	Enriched
ENSG00000278588	1406.94	1.32877	0.472685	2.81111	0.0049371	0.0366651	H2BC10	Enriched
ENSG00000100483	62.4531	1.32795	0.513169	2.58774	0.00966075	0.056984	VCPKMT	Not Significant
ENSG00000009830	61.1595	1.32782	0.397984	3.33637	0.00084879	0.0110284	POMT2	Enriched
ENSG00000125901	175.143	1.32763	0.452384	2.93474	0.00333824	0.0281999	MRPS26	Enriched
ENSG00000178741	578.715	1.32698	0.415652	3.19254	0.00141028	0.0156288	COX5A	Enriched
ENSG00000138111	59.4497	1.32673	0.476453	2.7846	0.00535931	0.0387265	MFSD13A	Enriched
ENSG00000121680	69.9824	1.32573	0.473883	2.79758	0.00514865	0.0377978	PEX16	Enriched
ENSG00000115275	322.346	1.32534	0.333621	3.97259	7.10965e-05	0.00187021	MOGS	Enriched
ENSG00000104731	310.124	1.325	0.271701	4.87668	1.07887e-06	7.15778e-05	KLHDC4	Enriched
ENSG00000277027	3758.23	1.32414	0.410592	3.22495	0.00125994	0.0144746	RMRP	Enriched
ENSG00000147324	477.973	1.3229	0.312735	4.2301	2.33585e-05	0.000797806	MFHAS1	Enriched
ENSG00000183864	620.207	1.32277	0.321298	4.11697	3.83892e-05	0.0011605	TOB2	Enriched
ENSG00000138744	157.933	1.32186	0.442127	2.98978	0.00279181	0.0250391	NAAA	Enriched
ENSG00000104969	580.746	1.32087	0.475066	2.78039	0.00542935	0.0390549	SGTA	Enriched
ENSG00000011422	40.0577	1.32059	0.463919	2.8466	0.00441888	0.0339082	PLAUR	Enriched
ENSG00000125912	533.452	1.31817	0.367535	3.58651	0.000335138	0.00574292	NCLN	Enriched
ENSG00000168273	30.9156	1.31758	0.494769	2.66302	0.00774433	0.0490158	UQCC5	Enriched
ENSG00000119705	165.519	1.31752	0.534595	2.46453	0.0137195	0.071626	SLIRP	Not Significant
ENSG00000278463	607.199	1.31684	0.459358	2.8667	0.0041477	0.0325265	H2AC4	Enriched
ENSG00000007376	118.946	1.31628	0.630504	2.08766	0.0368283	0.13591	RPUSD1	Not Significant
ENSG00000213619	244.231	1.31497	0.445107	2.95428	0.00313405	0.0270379	NDUFS3	Enriched
ENSG00000130821	48.21	1.31486	0.424512	3.09734	0.00195266	0.0195058	SLC6A8	Enriched
ENSG00000131779	86.6754	1.31382	0.388506	3.38173	0.000720317	0.00995431	PEX11B	Enriched
ENSG00000229833	15.8216	1.31353	0.647	2.03018	0.0423383	0.148461	PET100	Not Significant
ENSG00000183298	59.9843	1.3109	0.522506	2.50887	0.0121119	0.0656089	RPSAP19	Not Significant
ENSG00000148362	54.9641	1.30963	0.491227	2.66605	0.00767486	0.0486217	PAXX	Enriched
ENSG00000185504	254.426	1.30915	0.470647	2.7816	0.00540919	0.0390117	FAAP100	Enriched
ENSG00000241837	443.953	1.30913	0.441049	2.96822	0.0029953	0.0260693	ATP5PO	Enriched
ENSG00000189043	146.791	1.30361	0.467473	2.78863	0.00529307	0.0384145	NDUFA4	Enriched
ENSG00000214087	74.8754	1.30335	0.502021	2.59621	0.00942597	0.0561068	ARL16	Not Significant
ENSG00000100162	80.9361	1.30335	0.534943	2.43642	0.0148334	0.075228	CENPM	Not Significant
ENSG00000182362	33.473	1.30294	0.51565	2.5268	0.0115108	0.0635465	YBEY	Not Significant
ENSG00000169972	73.7272	1.30294	0.474628	2.74518	0.00604775	0.0420204	PUSL1	Enriched
ENSG00000102312	28.3768	1.30248	0.446375	2.91791	0.00352389	0.029273	PORCN	Enriched
ENSG00000230629	26.7606	1.30235	0.578492	2.25129	0.0243671	0.103707	RPS23P8	Not Significant
ENSG00000140264	548.425	1.3005	0.555044	2.34306	0.0191265	0.0887323	SERF2	Not Significant
ENSG00000219451	38.1945	1.30014	0.528168	2.4616	0.0138318	0.0720367	RPL23P8	Not Significant
ENSG00000235001	35.4047	1.29987	0.417885	3.11059	0.00186716	0.0190062	EIF4A1P2	Enriched
ENSG00000119977	198.421	1.29912	0.393645	3.30024	0.00096601	0.0121309	TCTN3	Enriched
ENSG00000144591	278.622	1.29696	0.295502	4.38902	1.13864e-05	0.000451678	GMPPA	Enriched
ENSG00000169136	189.693	1.29656	0.47343	2.73865	0.00616919	0.0425096	ATF5	Enriched
ENSG00000176731	58.719	1.29594	0.596826	2.17139	0.029902	0.11829	RBIS	Not Significant
ENSG00000164896	104.165	1.29554	0.59009	2.1955	0.0281278	0.113801	FASTK	Not Significant
ENSG00000055483	1146.16	1.29535	0.248681	5.20886	1.90009e-07	1.78062e-05	USP36	Enriched
ENSG00000088356	280.126	1.29524	0.485687	2.66681	0.00765745	0.0486217	PDRG1	Enriched
ENSG00000181418	161.228	1.29455	0.331907	3.90035	9.6054e-05	0.00235717	DDN	Enriched
ENSG00000137038	328.83	1.29446	0.471185	2.74724	0.00600988	0.0418154	DMAC1	Enriched
ENSG00000173153	255.1	1.29399	0.305603	4.23423	2.29339e-05	0.000786888	ESRRA	Enriched
ENSG00000172803	11.1431	1.29161	0.717628	1.79984	0.0718865	0.207162	SNX32	Not Significant
ENSG00000100949	79.7474	1.29148	0.384481	3.35902	0.000782188	0.0104212	RABGGTA	Enriched
ENSG00000128185	26.3987	1.29147	0.454669	2.84047	0.00450471	0.0344084	DGCR6L	Enriched
ENSG00000184260	341.425	1.29107	0.387737	3.32976	0.000869197	0.0112254	H2AC20	Enriched
ENSG00000147872	1881.52	1.28931	0.274129	4.70329	2.56007e-06	0.000146511	PLIN2	Enriched
ENSG00000100348	357.193	1.2892	0.373246	3.45404	0.000552259	0.00828887	TXN2	Enriched
ENSG00000174915	93.7282	1.28896	0.333335	3.86685	0.000110249	0.00259978	PTDSS2	Enriched
ENSG00000057757	1990.74	1.28879	0.327542	3.93472	8.32934e-05	0.00211678	PITHD1	Enriched
ENSG00000240230	200.519	1.28771	0.38782	3.32037	0.000898997	0.011472	COX19	Enriched
ENSG00000165724	273.398	1.28744	0.436984	2.94619	0.00321715	0.0275488	ZMYND19	Enriched
ENSG00000114767	441.947	1.28672	0.285973	4.49944	6.81314e-06	0.000308629	RRP9	Enriched
ENSG00000226084	53.0727	1.28641	0.63146	2.03719	0.0416308	0.146759	RPL17P6	Not Significant
ENSG00000073536	432.625	1.28535	0.256501	5.01109	5.41232e-07	4.18311e-05	NLE1	Enriched
ENSG00000123136	1133.68	1.28491	0.430646	2.98369	0.00284798	0.0253597	DDX39A	Enriched
ENSG00000197982	47.4252	1.28423	0.571843	2.24577	0.0247185	0.104639	C1orf122	Not Significant
ENSG00000185043	111.654	1.28393	0.504291	2.54602	0.0108959	0.0612575	CIB1	Not Significant
ENSG00000227473	28.489	1.28385	0.414281	3.09898	0.00194185	0.0194237	TSSK5P	Enriched
ENSG00000200795	1805.69	1.28376	0.816823	1.57165	0.116031	0.281153	RNU4-1	Not Significant
ENSG00000261236	1347.1	1.2836	0.257192	4.9908	6.01282e-07	4.46318e-05	BOP1	Enriched
ENSG00000198356	212.815	1.2828	0.483709	2.65202	0.00800125	0.050239	GET3	Not Significant
ENSG00000159556	18.0521	1.28154	0.602666	2.12646	0.0334652	0.127161	ISL2	Not Significant
ENSG00000167965	316.517	1.28075	0.397262	3.22394	0.00126441	0.0144839	MLST8	Enriched
ENSG00000116898	694.461	1.28059	0.452968	2.82711	0.00469708	0.0353732	MRPS15	Enriched
ENSG00000174886	28.1562	1.28046	0.621083	2.06165	0.0392411	0.14137	NDUFA11	Not Significant
ENSG00000135446	723.261	1.28042	0.44332	2.88826	0.00387381	0.0311872	CDK4	Enriched
ENSG00000147206	290.549	1.27872	0.262205	4.87678	1.07831e-06	7.15778e-05	NXF3	Enriched
ENSG00000234465	104.317	1.2786	0.457668	2.79372	0.00521051	0.0380362	PINLYP	Enriched
ENSG00000114391	1842.14	1.2783	0.555744	2.30015	0.0214396	0.0953611	RPL24	Not Significant
ENSG00000096006	102.187	1.27827	0.339707	3.76287	0.000167974	0.0034859	CRISP3	Enriched
ENSG00000167702	28.4301	1.27811	0.551582	2.31717	0.0204945	0.09281	KIFC2	Not Significant
ENSG00000156471	1681.27	1.27797	0.352496	3.6255	0.000288406	0.00515418	PTDSS1	Enriched
ENSG00000103266	83.1859	1.27747	0.426452	2.99558	0.00273924	0.0246828	STUB1	Enriched
ENSG00000256092	13.8445	1.27742	0.672258	1.90019	0.0574083	0.179516	SBNO1-AS1	Not Significant
ENSG00000133316	171.425	1.27658	0.357115	3.5747	0.000350625	0.00594714	WDR74	Enriched
ENSG00000108826	133.591	1.2761	0.466486	2.73556	0.00622748	0.0427155	MRPL27	Enriched
ENSG00000130165	185.276	1.27529	0.575375	2.21645	0.0266606	0.109839	ELOF1	Not Significant
ENSG00000141994	200.488	1.27475	0.454365	2.80556	0.00502295	0.0370538	DUS3L	Enriched
ENSG00000103174	49.5224	1.27336	0.360833	3.52895	0.000417218	0.00678499	NAGPA	Enriched
ENSG00000183569	10.5381	1.27318	0.646042	1.97074	0.0487537	0.161542	SERHL2	Not Significant
ENSG00000274210	203.198	1.27282	0.465087	2.73673	0.00620541	0.0426416	RNVU1-27	Enriched
ENSG00000008283	87.1335	1.27232	0.428196	2.97135	0.00296492	0.0260397	CYB561	Enriched
ENSG00000140983	361.648	1.27101	0.271375	4.68358	2.81905e-06	0.00015831	RHOT2	Enriched
ENSG00000137699	44.8289	1.27039	0.516157	2.46124	0.0138459	0.072085	TRIM29	Not Significant
ENSG00000109113	509.56	1.26943	0.428003	2.96594	0.00301755	0.0262139	RAB34	Enriched
ENSG00000163870	142.794	1.26885	0.465663	2.72483	0.00643353	0.0435308	TPRA1	Enriched
ENSG00000176749	36.2403	1.26829	0.523673	2.42191	0.015439	0.077035	CDK5R1	Not Significant
ENSG00000100814	452.847	1.26817	0.272886	4.64727	3.36353e-06	0.00017884	CCNB1IP1	Enriched
ENSG00000188486	1722.49	1.26808	0.596147	2.12713	0.033409	0.127044	H2AX	Not Significant
ENSG00000156603	54.4133	1.26789	0.549595	2.30695	0.0210579	0.0942232	MED19	Not Significant
ENSG00000161956	130.347	1.26764	0.519802	2.4387	0.0147403	0.0748701	SENP3	Not Significant
ENSG00000172269	356.983	1.26721	0.411403	3.08021	0.00206852	0.0203113	DPAGT1	Enriched
ENSG00000243725	14.4645	1.26664	0.628732	2.01459	0.0439476	0.152288	TTC4	Not Significant
ENSG00000099992	10.6336	1.26624	0.621709	2.03671	0.0416793	0.146837	TBC1D10A	Not Significant
ENSG00000168028	4497.67	1.26416	0.433518	2.91605	0.00354489	0.0293821	RPSA	Enriched
ENSG00000129538	23.2222	1.26262	0.443289	2.8483	0.00439538	0.0337971	RNASE1	Enriched
ENSG00000181019	26.7195	1.2615	0.587267	2.14808	0.0317072	0.122686	NQO1	Not Significant
ENSG00000103245	70.8089	1.2613	0.430097	2.9326	0.00336141	0.0282992	CIAO3	Enriched
ENSG00000100908	22.0756	1.26075	0.71116	1.77281	0.0762595	0.21498	EMC9	Not Significant
ENSG00000213185	25.23	1.25945	0.449759	2.80028	0.00510579	0.0375596	FAM24B	Enriched
ENSG00000136271	335.727	1.2584	0.310223	4.05644	4.98271e-05	0.00142306	DDX56	Enriched
ENSG00000079462	148.76	1.25732	0.463196	2.71444	0.00663871	0.0444379	PAFAH1B3	Enriched
ENSG00000130203	20.3902	1.2573	0.602006	2.08852	0.0367508	0.135737	APOE	Not Significant
ENSG00000140650	228.807	1.25729	0.300817	4.1796	2.92024e-05	0.000960222	PMM2	Enriched
ENSG00000269893	592.592	1.25717	0.667115	1.88449	0.0594986	0.183424	SNHG8	Not Significant
ENSG00000174109	28.6321	1.2571	0.51402	2.44563	0.0144599	0.0738461	UQCC4	Not Significant
ENSG00000143162	334.879	1.25693	0.461715	2.72231	0.00648269	0.043745	CREG1	Enriched
ENSG00000126267	327.311	1.25528	0.394607	3.18109	0.0014672	0.0160344	COX6B1	Enriched
ENSG00000128973	309.089	1.25419	0.322402	3.89014	0.000100186	0.00243074	CLN6	Enriched
ENSG00000132004	16.6423	1.25367	0.546569	2.29371	0.0218069	0.09631	FBXW9	Not Significant
ENSG00000008710	356.14	1.2533	0.240038	5.22123	1.77738e-07	1.68079e-05	PKD1	Enriched
ENSG00000128524	170.798	1.25273	0.524695	2.38753	0.016962	0.0823602	ATP6V1F	Not Significant
ENSG00000198276	45.359	1.25272	0.399931	3.13235	0.00173413	0.0180441	UCKL1	Enriched
ENSG00000060642	93.9583	1.25249	0.346598	3.61366	0.000301902	0.00530682	PIGV	Enriched
ENSG00000172428	41.907	1.25213	0.676739	1.85025	0.0642781	0.193019	COPS9	Not Significant
ENSG00000025770	270.728	1.25174	0.334392	3.74334	0.000181587	0.00368933	NCAPH2	Enriched
ENSG00000288722	15.6497	1.25168	0.544401	2.29918	0.0214945	0.095493	F8A1	Not Significant
ENSG00000196655	245.909	1.25068	0.444169	2.81577	0.00486608	0.0362815	TRAPPC4	Enriched
ENSG00000156873	51.3608	1.24986	0.605776	2.06323	0.0390908	0.141132	PHKG2	Not Significant
ENSG00000164758	51.2816	1.24938	0.531532	2.35052	0.018747	0.0877735	MED30	Not Significant
ENSG00000184357	8000.65	1.24916	0.411659	3.03446	0.00240965	0.0225314	H1-5	Enriched
ENSG00000101181	542.521	1.24905	0.235726	5.29874	1.16607e-07	1.22266e-05	MTG2	Enriched
ENSG00000187531	143.241	1.24896	0.299448	4.17088	3.03424e-05	0.00098475	SIRT7	Enriched
ENSG00000169733	32.795	1.24856	0.592811	2.10617	0.0351895	0.13171	RFNG	Not Significant
ENSG00000101246	106.457	1.24807	0.333975	3.73702	0.000186213	0.00375785	ARFRP1	Enriched
ENSG00000236552	496.235	1.24797	0.37193	3.3554	0.000792492	0.0104851	RPL13AP5	Enriched
ENSG00000198331	24.7631	1.24758	0.546226	2.284	0.0223715	0.0977668	HYLS1	Not Significant
ENSG00000104825	289.748	1.24727	0.268568	4.64417	3.41455e-06	0.000180911	NFKBIB	Enriched
ENSG00000124721	715.628	1.24693	0.759577	1.64161	0.10067	0.25556	DNAH8	Not Significant
ENSG00000131148	191.969	1.24667	0.458217	2.72069	0.00651464	0.0438423	EMC8	Enriched
ENSG00000160256	304.699	1.24583	0.405395	3.07314	0.00211822	0.0206418	SLX9	Enriched
ENSG00000197785	983.585	1.24578	0.301319	4.13442	3.55852e-05	0.00109787	ATAD3A	Enriched
ENSG00000102977	147.669	1.24547	0.455881	2.732	0.00629515	0.0429629	ACD	Enriched
ENSG00000155926	258.505	1.24544	0.291685	4.26983	1.95624e-05	0.00069016	SLA	Enriched
ENSG00000239264	31.8855	1.24513	0.515724	2.41434	0.0157639	0.0782922	TXNDC5	Not Significant
ENSG00000196154	329.257	1.24468	0.486916	2.55625	0.0105807	0.0601619	S100A4	Not Significant
ENSG00000130193	64.6443	1.24453	0.409756	3.03724	0.00238757	0.0224025	THEM6	Enriched
ENSG00000155034	145.555	1.24443	0.270081	4.60764	4.07272e-06	0.000209131	FBXL18	Enriched
ENSG00000171204	656.234	1.24414	0.377612	3.29475	0.000985079	0.0122881	TMEM126B	Enriched
ENSG00000100216	365.958	1.2436	0.511284	2.4323	0.0150033	0.0757677	TOMM22	Not Significant
ENSG00000172731	22.2623	1.24359	0.542499	2.29234	0.0218859	0.0965169	LRRC20	Not Significant
ENSG00000175334	282.054	1.24359	0.539253	2.30613	0.0211036	0.0943712	BANF1	Not Significant
ENSG00000101220	374.006	1.24306	0.396726	3.1333	0.00172853	0.0179983	ADISSP	Enriched
ENSG00000004779	164.482	1.24284	0.441853	2.81279	0.00491141	0.0365105	NDUFAB1	Enriched
ENSG00000290873	23.0257	1.24244	0.436785	2.84451	0.00444797	0.0340966	LINC03009	Enriched
ENSG00000204392	171.531	1.24226	0.473709	2.62241	0.00873102	0.0533204	LSM2	Not Significant
ENSG00000180044	50.8094	1.24219	0.348352	3.5659	0.000362608	0.0061158	C3orf80	Enriched
ENSG00000159111	435.739	1.24087	0.367497	3.37655	0.000734019	0.0100694	MRPL10	Enriched
ENSG00000160606	16.4169	1.24085	0.614726	2.01854	0.0435352	0.151384	TLCD1	Not Significant
ENSG00000185163	526.79	1.24071	0.263044	4.71672	2.3968e-06	0.000139293	DDX51	Enriched
ENSG00000099800	263.867	1.24002	0.438	2.83109	0.004639	0.0350591	TIMM13	Enriched
ENSG00000163472	35.7682	1.2399	0.475272	2.60882	0.00908556	0.0547324	TMEM79	Not Significant
ENSG00000198142	856.712	1.23812	0.32003	3.86877	0.000109385	0.00259513	SOWAHC	Enriched
ENSG00000213533	17.5964	1.23783	0.610924	2.02617	0.0427476	0.149417	STIMATE	Not Significant
ENSG00000114859	44.8146	1.23778	0.428276	2.89015	0.00385057	0.0310406	CLCN2	Enriched
ENSG00000185813	285.584	1.23775	0.348704	3.54957	0.000385865	0.00636518	PCYT2	Enriched
ENSG00000185624	3819.74	1.23758	0.338224	3.65906	0.000253139	0.00468011	P4HB	Enriched
ENSG00000215021	5738.68	1.23652	0.489973	2.52366	0.0116142	0.0639056	PHB2	Not Significant
ENSG00000140365	184.651	1.23648	0.373913	3.30686	0.00094349	0.0119183	COMMD4	Enriched
ENSG00000070413	223.858	1.23645	0.316727	3.90384	9.46784e-05	0.00233488	DGCR2	Enriched
ENSG00000103365	1888.04	1.23635	0.255754	4.83413	1.33727e-06	8.49618e-05	GGA2	Enriched
ENSG00000126602	545.583	1.23622	0.235995	5.23833	1.62039e-07	1.59843e-05	TRAP1	Enriched
ENSG00000187840	687.437	1.23429	0.40234	3.06778	0.00215655	0.020843	EIF4EBP1	Enriched
ENSG00000127564	140.656	1.23418	0.390193	3.16299	0.00156157	0.0167723	PKMYT1	Enriched
ENSG00000197568	34.3505	1.23296	0.420406	2.93279	0.00335928	0.0282972	ANKRD13C-DT	Enriched
ENSG00000263528	72.0959	1.23276	0.313732	3.92934	8.51798e-05	0.00215015	IKBKE	Enriched
ENSG00000167962	532.891	1.232	0.360121	3.42107	0.000623759	0.00899292	ZNF598	Enriched
ENSG00000100138	759.533	1.23199	0.462027	2.66649	0.00766488	0.0486217	SNU13	Enriched
ENSG00000148229	670.628	1.23165	0.521941	2.35975	0.0182875	0.0865603	POLE3	Not Significant
ENSG00000187049	28.2585	1.23082	0.720807	1.70756	0.0877182	0.235056	TMEM216	Not Significant
ENSG00000213983	56.9599	1.2307	0.433996	2.83575	0.00457186	0.0347267	AP1G2	Enriched
ENSG00000187193	24.7436	1.23032	0.620269	1.98352	0.047309	0.158784	MT1X	Not Significant
ENSG00000155287	93.0926	1.22851	0.426492	2.88049	0.00397055	0.0315665	SLC25A28	Enriched
ENSG00000174547	286.652	1.22754	0.511088	2.40183	0.0163135	0.0801456	MRPL11	Not Significant
ENSG00000164674	307.504	1.22724	0.245587	4.99715	5.81826e-07	4.36195e-05	SYTL3	Enriched
ENSG00000213593	796.772	1.227	0.531472	2.30869	0.0209609	0.0939577	TMX2	Not Significant
ENSG00000041880	37.9757	1.22697	0.457354	2.68276	0.00730166	0.0471327	PARP3	Enriched
ENSG00000136908	102.042	1.22681	0.563553	2.17692	0.0294866	0.117274	DPM2	Not Significant
ENSG00000105516	50.8253	1.22663	0.35479	3.45734	0.000545537	0.00823745	DBP	Enriched
ENSG00000104221	56.3787	1.22657	0.399153	3.07294	0.00211963	0.0206418	BRF2	Enriched
ENSG00000109065	233.413	1.22607	0.311675	3.9338	8.36126e-05	0.0021213	NAT9	Enriched
ENSG00000168298	6334.37	1.22595	0.39415	3.11036	0.00186857	0.0190077	H1-4	Enriched
ENSG00000099899	545.329	1.22583	0.249316	4.91676	8.79871e-07	6.06167e-05	TRMT2A	Enriched
ENSG00000131495	66.2443	1.22498	0.625311	1.959	0.0501128	0.164382	NDUFA2	Not Significant
ENSG00000155256	146.317	1.22364	0.304655	4.01646	5.90781e-05	0.00160765	ZFYVE27	Enriched
ENSG00000168040	35.7612	1.22339	0.498913	2.45212	0.0142019	0.0731513	FADD	Not Significant
ENSG00000099341	1123.86	1.22149	0.390237	3.13013	0.00174728	0.0181207	PSMD8	Enriched
ENSG00000175602	224.856	1.22136	0.462884	2.63859	0.00832512	0.0515814	CCDC85B	Not Significant
ENSG00000167862	88.2867	1.22064	0.435483	2.80296	0.00506365	0.0373093	MRPL58	Enriched
ENSG00000127554	34.7041	1.21989	0.430253	2.83528	0.00457861	0.0347456	GFER	Enriched
ENSG00000114956	297.16	1.21843	0.527844	2.30831	0.0209818	0.0940228	DGUOK	Not Significant
ENSG00000165684	309.241	1.21816	0.320342	3.80268	0.000143138	0.00311217	SNAPC4	Enriched
ENSG00000156482	1137.75	1.21816	0.366157	3.32687	0.000878287	0.0112942	RPL30	Enriched
ENSG00000181524	230.755	1.2176	0.441456	2.75814	0.00581321	0.0407884	RPL24P4	Enriched
ENSG00000066379	66.5859	1.21722	0.516848	2.35507	0.018519	0.0871874	POLR1H	Not Significant
ENSG00000226950	426.444	1.2167	0.448559	2.71246	0.00667864	0.0446166	DANCR	Enriched
ENSG00000065057	106.474	1.21653	0.342266	3.55433	0.00037894	0.00629804	NTHL1	Enriched
ENSG00000100300	91.7944	1.21609	0.362445	3.35523	0.00079299	0.0104851	TSPO	Enriched
ENSG00000100142	169.189	1.21517	0.623804	1.948	0.0514147	0.167117	POLR2F	Not Significant
ENSG00000168301	34.8149	1.21512	0.529122	2.29648	0.0216485	0.0959495	KCTD6	Not Significant
ENSG00000125991	720.71	1.21492	0.435619	2.78894	0.00528813	0.0384145	ERGIC3	Enriched
ENSG00000145248	132.748	1.21485	0.444371	2.73386	0.00625959	0.0428176	SLC10A4	Enriched
ENSG00000141076	576.03	1.2147	0.259089	4.68836	2.75406e-06	0.000155828	UTP4	Enriched
ENSG00000183172	69.3504	1.21452	0.673719	1.80272	0.0714327	0.206211	SMDT1	Not Significant
ENSG00000148334	206.805	1.21411	0.447375	2.71384	0.00665078	0.044497	PTGES2	Enriched
ENSG00000133027	24.7412	1.21389	0.49834	2.43587	0.014856	0.075228	PEMT	Not Significant
ENSG00000111671	34.2842	1.21374	0.565806	2.14516	0.0319401	0.123303	SPSB2	Not Significant
ENSG00000198931	247.989	1.21271	0.461795	2.62609	0.00863726	0.0529249	APRT	Not Significant
ENSG00000103811	350.374	1.21253	0.357411	3.39252	0.000692521	0.00970436	CTSH	Enriched
ENSG00000167770	498.981	1.21214	0.443763	2.7315	0.00630473	0.0429633	OTUB1	Enriched
ENSG00000177192	598.603	1.21209	0.255756	4.73922	2.1454e-06	0.000126149	PUS1	Enriched
ENSG00000213316	22.9725	1.21196	0.602041	2.01309	0.0441051	0.152622	LTC4S	Not Significant
ENSG00000103512	744.257	1.21077	0.273586	4.42555	9.61957e-06	0.000398421	NOMO1	Enriched
ENSG00000132361	1656.61	1.21057	0.246619	4.90865	9.17043e-07	6.2786e-05	CLUH	Enriched
ENSG00000114942	1787.14	1.2105	0.441765	2.74015	0.00614106	0.0423741	EEF1B2	Enriched
ENSG00000169715	23.5456	1.21017	0.577029	2.09725	0.0359715	0.133832	MT1E	Not Significant
ENSG00000164867	24.4782	1.21005	0.468772	2.58132	0.00984227	0.0575996	NOS3	Not Significant
ENSG00000213553	673.073	1.20844	0.362157	3.33678	0.00084756	0.011022	RPLP0P6	Enriched
ENSG00000135940	334.249	1.20814	0.478643	2.52409	0.0115997	0.0638496	COX5B	Not Significant
ENSG00000228300	87.2581	1.207	0.537727	2.24464	0.024791	0.104886	FAM174C	Not Significant
ENSG00000183605	139.645	1.20691	0.37898	3.18462	0.00144943	0.0158866	SFXN4	Enriched
ENSG00000104980	514.048	1.20681	0.26815	4.50051	6.77912e-06	0.000308019	TIMM44	Enriched
ENSG00000125967	34.1831	1.20672	0.522169	2.31098	0.020834	0.0936124	NECAB3	Not Significant
ENSG00000185803	224.484	1.20651	0.48944	2.46509	0.0136981	0.0715761	SLC52A2	Not Significant
ENSG00000101363	56.2588	1.20651	0.355667	3.39224	0.000693243	0.0097054	MANBAL	Enriched
ENSG00000167733	9.37274	1.20576	0.698924	1.72516	0.0844984	0.229876	HSD11B1L	Not Significant
ENSG00000171617	4112.14	1.20563	0.241148	4.99953	5.74688e-07	4.33009e-05	ENC1	Enriched
ENSG00000164713	37.5491	1.20541	0.475133	2.537	0.0111806	0.0622975	BRI3	Not Significant
ENSG00000214706	414.057	1.20507	0.470031	2.5638	0.0103532	0.059408	IFRD2	Not Significant
ENSG00000178605	251.949	1.2046	0.387896	3.10547	0.00189976	0.0192076	GTPBP6	Enriched
ENSG00000100263	117.738	1.20415	0.416071	2.89411	0.00380237	0.0308164	RHBDD3	Enriched
ENSG00000119559	116.455	1.2034	0.357092	3.36999	0.000751696	0.0102184	C19orf25	Enriched
ENSG00000172590	147.1	1.20308	0.597484	2.01358	0.0440532	0.152513	MRPL52	Not Significant
ENSG00000251705	44.2146	1.20295	0.634379	1.89626	0.0579259	0.180683	RNA5-8SP6	Not Significant
ENSG00000196976	55.2019	1.20236	0.565292	2.12697	0.0334229	0.127065	LAGE3	Not Significant
ENSG00000113732	95.4785	1.2021	0.623896	1.92676	0.0540093	0.172567	ATP6V0E1	Not Significant
ENSG00000156127	30.0089	1.20206	0.65042	1.84813	0.0645835	0.193557	BATF	Not Significant
ENSG00000187051	333.539	1.20156	0.540274	2.22399	0.0261494	0.10843	RPS19BP1	Not Significant
ENSG00000105576	617.902	1.20133	0.237683	5.05435	4.31866e-07	3.4814e-05	TNPO2	Enriched
ENSG00000270170	121.858	1.20126	0.405417	2.96301	0.00304644	0.0263732	NCBP2AS2	Enriched
ENSG00000100726	72.7854	1.2011	0.404659	2.96818	0.00299569	0.0260693	TELO2	Enriched
ENSG00000063241	156.37	1.20058	0.476743	2.5183	0.0117923	0.0645427	ISOC2	Not Significant
ENSG00000104907	282.803	1.20046	0.283015	4.24167	2.21863e-05	0.000764739	TRMT1	Enriched
ENSG00000165283	451.892	1.20022	0.446324	2.68913	0.00716395	0.0466622	STOML2	Enriched
ENSG00000158406	7959.62	1.19763	0.408086	2.93473	0.00333833	0.0281999	H4C8	Enriched
ENSG00000125995	99.2886	1.19688	0.588081	2.03523	0.0418278	0.147153	ROMO1	Not Significant
ENSG00000122034	709.233	1.19621	0.365593	3.27198	0.00106798	0.0129557	GTF3A	Enriched
ENSG00000158480	102.004	1.19559	0.450137	2.65606	0.00790588	0.049839	SPATA2	Enriched
ENSG00000188243	59.124	1.19436	0.486212	2.45647	0.014031	0.0726955	COMMD6	Not Significant
ENSG00000180573	1571.83	1.19435	0.464085	2.57355	0.010066	0.0582967	H2AC6	Not Significant
ENSG00000184678	1053.77	1.19421	0.415356	2.87514	0.00403844	0.0319369	H2BC21	Enriched
ENSG00000183617	38.9401	1.1942	0.518188	2.30457	0.0211905	0.0946945	MRPL54	Not Significant
ENSG00000105402	138.355	1.19408	0.504998	2.36452	0.0180535	0.0859892	NAPA	Not Significant
ENSG00000103415	133.257	1.19395	0.337719	3.53534	0.000407258	0.00665914	HMOX2	Enriched
ENSG00000124562	349.778	1.19381	0.355767	3.3556	0.000791928	0.0104851	SNRPC	Enriched
ENSG00000252947	66.9688	1.19234	0.650416	1.8332	0.0667734	0.197854	SCARNA1	Not Significant
ENSG00000278535	88.2126	1.19203	0.388555	3.06786	0.00215597	0.020843	DHRS11	Enriched
ENSG00000181588	57.5809	1.19175	0.489398	2.43513	0.0148866	0.0753578	MEX3D	Not Significant
ENSG00000121671	153.28	1.19134	0.290296	4.10388	4.06274e-05	0.00120627	CRY2	Enriched
ENSG00000105700	169.003	1.19115	0.397622	2.9957	0.00273817	0.0246828	KXD1	Enriched
ENSG00000178980	93.7729	1.19005	0.486135	2.44799	0.0143656	0.0736628	SELENOW	Not Significant
ENSG00000120697	360.771	1.19004	0.337793	3.52298	0.000426723	0.00688728	ALG5	Enriched
ENSG00000160072	407.629	1.18969	0.48832	2.43629	0.0148388	0.075228	ATAD3B	Not Significant
ENSG00000244187	26.2882	1.18932	0.595384	1.99757	0.045763	0.155369	TMEM141	Not Significant
ENSG00000196683	224.256	1.18875	0.506513	2.34693	0.018929	0.0881433	TOMM7	Not Significant
ENSG00000258701	9.18443	1.18831	0.70833	1.67763	0.0934199	0.244713	VESTAR	Not Significant
ENSG00000130309	489.959	1.18807	0.420032	2.82851	0.0046765	0.0352891	COLGALT1	Enriched
ENSG00000157778	94.1493	1.18688	0.608422	1.95074	0.0510874	0.166487	PSMG3	Not Significant
ENSG00000104524	95.9104	1.18641	0.60316	1.96698	0.0491852	0.162477	PYCR3	Not Significant
ENSG00000129562	135.464	1.18602	0.552688	2.1459	0.0318806	0.123137	DAD1	Not Significant
ENSG00000183011	253.953	1.18551	0.45227	2.62125	0.00876071	0.0534411	NAA38	Not Significant
ENSG00000115286	25.31	1.18516	0.503244	2.35505	0.0185202	0.0871874	NDUFS7	Not Significant
ENSG00000186086	11.3525	1.18504	0.604469	1.96047	0.0499411	0.164178	NBPF6	Not Significant
ENSG00000137309	2959.74	1.18498	0.428883	2.76293	0.00572843	0.0405051	HMGA1	Enriched
ENSG00000176248	149.247	1.18455	0.300963	3.93587	8.28962e-05	0.00211026	ANAPC2	Enriched
ENSG00000102030	78.8278	1.18379	0.522513	2.26557	0.0234777	0.101098	NAA10	Not Significant
ENSG00000137547	625.127	1.18372	0.295463	4.00633	6.16703e-05	0.00166012	MRPL15	Enriched
ENSG00000081692	48.5889	1.1832	0.50253	2.35449	0.0185481	0.0872364	JMJD4	Not Significant
ENSG00000123144	947.094	1.18222	0.398275	2.96835	0.00299403	0.0260693	TRIR	Enriched
ENSG00000232472	79.992	1.18203	0.558367	2.11695	0.0342643	0.129182	EEF1B2P3	Not Significant
ENSG00000100979	108.763	1.18103	0.407962	2.89494	0.00379227	0.0307656	PLTP	Enriched
ENSG00000199436	12.804	1.18084	0.764685	1.54421	0.122536	0.290438	SNORD9	Not Significant
ENSG00000169689	76.6366	1.18035	0.696037	1.69581	0.0899214	0.239055	CENPX	Not Significant
ENSG00000121897	402.992	1.17903	0.315618	3.73563	0.000187244	0.00377357	LIAS	Enriched
ENSG00000171960	427.268	1.179	0.381985	3.08652	0.00202517	0.0199641	PPIH	Enriched
ENSG00000212195	45.822	1.17892	0.891088	1.32302	0.18583	0.377443	LOC124904154	Not Significant
ENSG00000171056	9.87813	1.17882	0.663144	1.77762	0.0754669	0.213642	SOX7	Not Significant
ENSG00000089685	894.505	1.17857	0.55647	2.11794	0.0341806	0.128997	BIRC5	Not Significant
ENSG00000251022	57.8271	1.17841	0.333956	3.52864	0.000417695	0.0067854	THAP9-AS1	Enriched
ENSG00000262919	64.0557	1.17774	0.535296	2.20017	0.0277948	0.113034	CCNQ	Not Significant
ENSG00000259494	19.2288	1.17745	0.561978	2.09519	0.0361538	0.134181	MRPL46	Not Significant
ENSG00000162413	936.214	1.17596	0.232486	5.05819	4.23264e-07	3.4305e-05	KLHL21	Enriched
ENSG00000183763	142.345	1.17539	0.255366	4.60276	4.16937e-06	0.000213234	TRAIP	Enriched
ENSG00000111775	198.494	1.17504	0.45849	2.56284	0.010382	0.0595058	COX6A1	Not Significant
ENSG00000092621	731.51	1.17483	0.306338	3.83507	0.000125527	0.00285879	PHGDH	Enriched
ENSG00000154832	551.434	1.17469	0.251709	4.66686	3.05845e-06	0.000169219	CXXC1	Enriched
ENSG00000177370	138.887	1.17452	0.433952	2.70656	0.00679835	0.0450439	TIMM22	Enriched
ENSG00000175061	562.775	1.17428	0.38563	3.0451	0.00232602	0.0219671	SNHG29	Enriched
ENSG00000141499	116.656	1.17426	0.325863	3.60356	0.000313893	0.00547268	WRAP53	Enriched
ENSG00000226314	15.3006	1.17291	0.541489	2.16608	0.0303049	0.119294	ZKSCAN8P1	Not Significant
ENSG00000173638	1034.06	1.1729	0.378841	3.09601	0.00196144	0.0195674	SLC19A1	Enriched
ENSG00000074706	182.578	1.17065	0.363985	3.21621	0.00129895	0.0147437	IPCEF1	Enriched
ENSG00000178035	55.722	1.17051	0.596975	1.96074	0.0499092	0.164109	IMPDH2	Not Significant
ENSG00000142632	46.196	1.1692	0.518148	2.2565	0.0240394	0.102834	ARHGEF19	Not Significant
ENSG00000170889	1723.36	1.16902	0.357194	3.27277	0.00106499	0.0129509	RPS9	Enriched
ENSG00000148444	40.436	1.1675	0.481081	2.42682	0.0152319	0.0763869	COMMD3	Not Significant
ENSG00000164010	1085.48	1.16726	0.2541	4.59368	4.35495e-06	0.000219121	ERMAP	Enriched
ENSG00000174136	12.4897	1.16721	0.583133	2.00161	0.0453262	0.154635	RGMB	Not Significant
ENSG00000173207	226.011	1.16712	0.60483	1.92966	0.0536486	0.171662	CKS1B	Not Significant
ENSG00000134802	540.667	1.16659	0.375965	3.10291	0.00191629	0.0192881	SLC43A3	Enriched
ENSG00000196465	80.8092	1.16507	0.363954	3.20114	0.00136886	0.0153468	MYL6B	Enriched
ENSG00000243904	44.4374	1.16505	0.521495	2.23406	0.0254794	0.106625	RPSAP5	Not Significant
ENSG00000067829	91.3918	1.16485	0.372383	3.1281	0.0017594	0.0181961	IDH3G	Enriched
ENSG00000206828	15.299	1.16374	0.765889	1.51946	0.128646	0.299614	RNVU1-30	Not Significant
ENSG00000176410	38.1451	1.16374	0.40237	2.89221	0.00382542	0.0309377	DNAJC30	Enriched
ENSG00000233822	818.698	1.16355	0.401501	2.89801	0.0037554	0.0305526	H2BC15	Enriched
ENSG00000173465	57.2285	1.16351	0.568079	2.04814	0.0405459	0.144516	ZNRD2	Not Significant
ENSG00000158062	34.6807	1.16267	0.530057	2.19348	0.0282728	0.114223	UBXN11	Not Significant
ENSG00000187778	472.865	1.16115	0.363797	3.19174	0.00141417	0.0156487	MCRS1	Enriched
ENSG00000071082	2570.17	1.16095	0.360574	3.21972	0.00128317	0.01462	RPL31	Enriched
ENSG00000103876	626.65	1.1609	0.364162	3.18787	0.00143327	0.0157902	FAH	Enriched
ENSG00000126391	401.64	1.16047	0.292455	3.96804	7.24666e-05	0.00188968	FRMD8	Enriched
ENSG00000167992	52.2622	1.16002	0.457622	2.53487	0.0112487	0.0624988	VWCE	Not Significant
ENSG00000108773	329.26	1.15955	0.431494	2.68729	0.00720345	0.0467772	KAT2A	Enriched
ENSG00000149761	52.7667	1.15952	0.51588	2.24765	0.0245987	0.104337	NUDT22	Not Significant
ENSG00000175564	19.0456	1.15824	0.51199	2.26223	0.0236833	0.101808	UCP3	Not Significant
ENSG00000174021	79.8473	1.15811	0.537087	2.15629	0.031061	0.121126	GNG5	Not Significant
ENSG00000037897	96.4693	1.15811	0.519122	2.23091	0.0256871	0.107136	METTL1	Not Significant
ENSG00000264229	88.573	1.15716	0.838073	1.38074	0.167358	0.35428	RNU4ATAC	Not Significant
ENSG00000173660	1194.63	1.15632	0.445189	2.59736	0.00939427	0.0559625	UQCRH	Not Significant
ENSG00000126368	96.5893	1.15629	0.356554	3.24297	0.00118292	0.0138352	NR1D1	Enriched
ENSG00000127399	82.2323	1.1551	0.498492	2.31719	0.0204934	0.09281	LRRC61	Not Significant
ENSG00000181830	84.8664	1.15481	0.432508	2.67003	0.00758448	0.0483511	SLC35C1	Enriched
ENSG00000138326	3046.42	1.15454	0.427966	2.69773	0.00698139	0.0459118	RPS24	Enriched
ENSG00000183048	16.3883	1.15438	0.803396	1.43687	0.150754	0.331975	SLC25A10	Not Significant
ENSG00000185345	101.272	1.15382	0.32127	3.59142	0.000328879	0.00564859	PRKN	Enriched
ENSG00000145912	180.566	1.15378	0.408541	2.82413	0.00474084	0.0355955	NHP2	Enriched
ENSG00000179271	310.659	1.15364	0.459461	2.51086	0.0120437	0.0654525	GADD45GIP1	Not Significant
ENSG00000103257	1650.66	1.15351	0.285141	4.04539	5.22366e-05	0.00146949	SLC7A5	Enriched
ENSG00000101361	2067.33	1.15327	0.248058	4.64921	3.33215e-06	0.000178645	NOP56	Enriched
ENSG00000283041	487.52	1.15291	0.298593	3.86114	0.000112857	0.00263991	LOC729998	Enriched
ENSG00000108788	218.937	1.15228	0.451417	2.55257	0.0106931	0.0605025	MLX	Not Significant
ENSG00000105197	731.736	1.15183	0.299691	3.8434	0.000121344	0.00279482	TIMM50	Enriched
ENSG00000117308	359.216	1.15173	0.353586	3.25727	0.00112488	0.0133648	GALE	Enriched
ENSG00000135245	66.7237	1.15162	0.337235	3.41489	0.000638078	0.00915536	HILPDA	Enriched
ENSG00000177542	168.523	1.15118	0.50636	2.27344	0.0229998	0.0994692	SLC25A22	Not Significant
ENSG00000205871	13.4501	1.15077	0.633178	1.81745	0.0691488	0.202249	RPS3AP47	Not Significant
ENSG00000171311	78.6851	1.15021	0.444066	2.59017	0.00959295	0.0567127	EXOSC1	Not Significant
ENSG00000179743	20.2096	1.15006	0.676053	1.70113	0.0889181	0.237189	SPEN-AS1	Not Significant
ENSG00000198546	40.0404	1.14996	0.485791	2.36719	0.0179236	0.0855879	ZNF511	Not Significant
ENSG00000182325	104.814	1.14996	0.521592	2.20471	0.0274746	0.112096	FBXL6	Not Significant
ENSG00000104853	419.615	1.14956	0.484665	2.37187	0.0176983	0.0848634	CLPTM1	Not Significant
ENSG00000175213	69.7044	1.14951	0.316212	3.63527	0.000277692	0.00503471	ZNF408	Enriched
ENSG00000116685	441.961	1.1494	0.370095	3.1057	0.00189829	0.0192058	KIAA2013	Enriched
ENSG00000174851	104.637	1.14937	0.536543	2.14217	0.0321798	0.124043	YIF1A	Not Significant
ENSG00000177606	321.581	1.14929	0.522673	2.19888	0.0278867	0.113285	JUN	Not Significant
ENSG00000129932	189.943	1.14924	0.304914	3.76906	0.000163865	0.00343636	DOHH	Enriched
ENSG00000040531	50.879	1.14813	0.420552	2.73005	0.00633243	0.0430801	CTNS	Enriched
ENSG00000060971	182.197	1.14798	0.333359	3.44366	0.000573891	0.00847776	ACAA1	Enriched
ENSG00000131480	9.53061	1.14738	0.70946	1.61726	0.105823	0.263616	AOC2	Not Significant
ENSG00000172009	494.441	1.14685	0.240137	4.7758	1.78993e-06	0.000108218	THOP1	Enriched
ENSG00000252213	78.9193	1.14578	0.606879	1.88799	0.0590268	0.182719	SNORA74D	Not Significant
ENSG00000134184	118.747	1.14565	0.413216	2.77252	0.00556245	0.0396667	GSTM1	Enriched
ENSG00000138073	335.115	1.14555	0.417591	2.74324	0.00608369	0.0421718	PREB	Enriched
ENSG00000179526	175.095	1.14508	0.404913	2.82797	0.00468444	0.03533	SHARPIN	Enriched
ENSG00000108515	21.2	1.14493	0.465307	2.46059	0.0138707	0.0721457	ENO3	Not Significant
ENSG00000161558	44.5118	1.14481	0.397008	2.8836	0.00393164	0.0313903	TMEM143	Enriched
ENSG00000197355	143.233	1.14438	0.268911	4.25562	2.0847e-05	0.000725244	UAP1L1	Enriched
ENSG00000176101	110.037	1.1418	0.57997	1.96872	0.0489856	0.162058	SSNA1	Not Significant
ENSG00000148926	10.1006	1.14106	0.716433	1.5927	0.111227	0.272827	ADM	Not Significant
ENSG00000104904	807.707	1.14026	0.479902	2.37602	0.0175007	0.0841851	OAZ1	Not Significant
ENSG00000175826	323.374	1.13979	0.602365	1.89219	0.0584654	0.181836	CTDNEP1	Not Significant
ENSG00000141002	284.176	1.13898	0.294554	3.8668	0.000110275	0.00259978	TCF25	Enriched
ENSG00000178982	976.531	1.13866	0.304282	3.74212	0.000182476	0.00369735	EIF3K	Enriched
ENSG00000116691	75.0213	1.13795	0.420645	2.70526	0.00682505	0.045161	MIIP	Enriched
ENSG00000242083	10.387	1.13726	0.63881	1.78027	0.0750315	0.212911	RPL7AP31	Not Significant
ENSG00000101247	72.5166	1.13703	0.541085	2.10139	0.0356064	0.132939	NDUFAF5	Not Significant
ENSG00000142227	303.474	1.13667	0.421838	2.69457	0.00704787	0.0462071	EMP3	Enriched
ENSG00000141101	465.78	1.13575	0.233136	4.87161	1.10695e-06	7.3117e-05	NOB1	Enriched
ENSG00000005022	1392.76	1.13467	0.360058	3.15135	0.0016252	0.0172255	SLC25A5	Enriched
ENSG00000240342	668.137	1.13401	0.335033	3.38477	0.000712385	0.00989944	RPS2P5	Enriched
ENSG00000233762	43.3736	1.13337	0.467871	2.4224	0.0154182	0.0769577	RPS15P4	Not Significant
ENSG00000127054	1055.15	1.1333	0.234939	4.82383	1.40829e-06	8.8351e-05	INTS11	Enriched
ENSG00000136068	1022.6	1.1331	0.508734	2.2273	0.0259273	0.107837	FLNB	Not Significant
ENSG00000103042	66.7407	1.13196	0.381284	2.96881	0.00298955	0.0260693	SLC38A7	Enriched
ENSG00000063761	20.7271	1.13172	0.552342	2.04895	0.0404668	0.144386	ADCK1	Not Significant
ENSG00000262154	11.4986	1.13126	0.589546	1.91887	0.0550009	0.174706	EIF1P4	Not Significant
ENSG00000053372	1503.58	1.13084	0.324448	3.48544	0.000491334	0.00768203	MRTO4	Enriched
ENSG00000134809	170.572	1.13034	0.523336	2.15987	0.0307828	0.120511	TIMM10	Not Significant
ENSG00000155368	323.498	1.13028	0.387985	2.91321	0.00357734	0.029553	DBI	Enriched
ENSG00000103253	32.6756	1.13024	0.538935	2.09718	0.0359776	0.133832	HAGHL	Not Significant
ENSG00000115526	210.962	1.12985	0.370783	3.0472	0.00230983	0.0218647	CHST10	Enriched
ENSG00000253716	25.312	1.12958	0.672568	1.67951	0.0930529	0.24405	MINCR	Not Significant
ENSG00000143418	964.139	1.12916	0.369291	3.05764	0.00223085	0.0213325	CERS2	Enriched
ENSG00000270276	42.7255	1.12889	0.426718	2.64551	0.00815672	0.0509167	H4C15	Not Significant
ENSG00000143891	19.5979	1.12881	0.479302	2.35512	0.0185165	0.0871874	GALM	Not Significant
ENSG00000148824	36.5336	1.12841	0.678865	1.6622	0.0964717	0.249482	MTG1	Not Significant
ENSG00000117448	371.426	1.12697	0.302397	3.72677	0.000193949	0.00385234	AKR1A1	Enriched
ENSG00000242485	252.036	1.12529	0.442182	2.54487	0.0109319	0.0613677	MRPL20	Not Significant
ENSG00000171135	175.921	1.12498	0.500873	2.24605	0.024701	0.104623	JAGN1	Not Significant
ENSG00000159720	169.119	1.12488	0.503272	2.23514	0.0254081	0.106548	ATP6V0D1	Not Significant
ENSG00000187713	214.791	1.12466	0.385995	2.91365	0.00357227	0.0295413	TMEM203	Enriched
ENSG00000165802	260.206	1.1242	0.448114	2.50873	0.0121165	0.06561	NSMF	Not Significant
ENSG00000183010	236.084	1.12401	0.384976	2.91969	0.00350381	0.0291868	PYCR1	Enriched
ENSG00000110717	170.725	1.12382	0.458627	2.4504	0.0142696	0.0734244	NDUFS8	Not Significant
ENSG00000163900	318.472	1.1225	0.3271	3.43169	0.000599839	0.00877462	TMEM41A	Enriched
ENSG00000198034	2575.29	1.12193	0.315358	3.55764	0.000374199	0.00624803	RPS4X	Enriched
ENSG00000144290	11.1663	1.1217	0.725141	1.54687	0.121895	0.289559	SLC4A10	Not Significant
ENSG00000133169	90.9655	1.12163	0.360988	3.10711	0.00188926	0.0191791	BEX1	Enriched
ENSG00000121716	15.2563	1.12155	0.622004	1.80313	0.0713684	0.206189	PILRB	Not Significant
ENSG00000075426	500.22	1.12132	0.408848	2.74263	0.00609486	0.0421718	FOSL2	Enriched
ENSG00000161016	4774.54	1.12091	0.346619	3.23383	0.00122141	0.0141093	RPL8	Enriched
ENSG00000134716	68.4011	1.12049	0.325833	3.43886	0.000584168	0.0086126	CYP2J2	Enriched
ENSG00000261819	10.8514	1.12036	0.616903	1.8161	0.0693558	0.202539	LOC728138	Not Significant
ENSG00000213626	91.1125	1.12019	0.35081	3.19316	0.00140727	0.0156185	LBH	Enriched
ENSG00000251364	32.5839	1.12012	0.454037	2.46703	0.0136239	0.0712761	SYT9-AS1	Not Significant
ENSG00000103043	261.671	1.11964	0.266566	4.20022	2.66653e-05	0.000894452	VAC14	Enriched
ENSG00000249915	41.9803	1.11921	0.441597	2.53446	0.0112622	0.0625426	PDCD6	Not Significant
ENSG00000101665	12.7759	1.11907	0.59263	1.88832	0.0589834	0.182689	SMAD7	Not Significant
ENSG00000067191	23.1735	1.11867	0.654397	1.70947	0.0873645	0.234715	CACNB1	Not Significant
ENSG00000122515	178.195	1.11824	0.302453	3.69722	0.00021797	0.00416336	ZMIZ2	Enriched
ENSG00000247137	23.4441	1.11776	0.490433	2.27913	0.0226596	0.0985378	ANKRD42-DT	Not Significant
ENSG00000140988	3309.95	1.11762	0.411479	2.71609	0.00660573	0.0442962	RPS2	Enriched
ENSG00000277791	342.899	1.11734	0.487549	2.29175	0.0219198	0.0965921	PSMB3	Not Significant
ENSG00000220472	165.348	1.11677	0.577697	1.93315	0.0532181	0.170868	RPS3P4	Not Significant
ENSG00000126453	210.448	1.11617	0.515051	2.1671	0.030227	0.119093	BCL2L12	Not Significant
ENSG00000144659	360.923	1.1157	0.273399	4.08086	4.48694e-05	0.00130635	SLC25A38	Enriched
ENSG00000167114	138.113	1.11449	0.534706	2.08431	0.0371322	0.136635	SLC27A4	Not Significant
ENSG00000106211	333.547	1.11447	0.635959	1.75242	0.0797015	0.221478	HSPB1	Not Significant
ENSG00000148843	2883.13	1.11439	0.439429	2.53598	0.0112132	0.062386	PDCD11	Not Significant
ENSG00000160214	1456.73	1.11409	0.297179	3.74889	0.000177617	0.00362339	RRP1	Enriched
ENSG00000235560	13.0605	1.11361	0.631807	1.76258	0.077972	0.218099	ZNF747-DT	Not Significant
ENSG00000162599	296.824	1.11246	0.279755	3.97655	6.9922e-05	0.00184991	NFIA	Enriched
ENSG00000291063	24.9059	1.11194	0.552649	2.01201	0.0442187	0.152741	LOC107984974	Not Significant
ENSG00000120068	19.3211	1.11074	0.75622	1.46881	0.141885	0.31972	HOXB8	Not Significant
ENSG00000214389	78.2228	1.11065	0.504098	2.20325	0.0275771	0.112392	RPS3AP26	Not Significant
ENSG00000105472	401.017	1.11026	0.409717	2.70981	0.00673209	0.044783	CLEC11A	Enriched
ENSG00000092036	91.2169	1.11011	0.369986	3.00041	0.0026962	0.0244271	HAUS4	Enriched
ENSG00000132205	230.964	1.10988	0.348493	3.18481	0.00144847	0.0158866	EMILIN2	Enriched
ENSG00000132341	6078.37	1.10948	0.377845	2.93635	0.00332097	0.0281285	RAN	Enriched
ENSG00000125445	800.83	1.10875	0.422806	2.62236	0.00873228	0.0533204	MRPS7	Not Significant
ENSG00000161654	186.298	1.10758	0.509794	2.1726	0.0298106	0.118061	LSM12	Not Significant
ENSG00000130811	948.455	1.107	0.367525	3.01204	0.00259498	0.0236961	EIF3G	Enriched
ENSG00000188735	219.03	1.1067	0.290372	3.81131	0.000138233	0.00306154	TMEM120B	Enriched
ENSG00000185085	193.587	1.10668	0.365888	3.02464	0.00248928	0.0230824	INTS5	Enriched
ENSG00000155463	757.159	1.1065	0.251195	4.40495	1.05808e-05	0.000427624	OXA1L	Enriched
ENSG00000105202	1448.79	1.10643	0.263933	4.19208	2.76403e-05	0.000916899	FBL	Enriched
ENSG00000274452	22.7088	1.10611	0.96462	1.14668	0.251514	0.453434	LOC124904145	Not Significant
ENSG00000081721	135.733	1.10605	0.365829	3.0234	0.00249953	0.0231488	DUSP12	Enriched
ENSG00000103168	141.88	1.10604	0.31062	3.56073	0.000369819	0.00619561	TAF1C	Enriched
ENSG00000291228	74.5893	1.10598	0.48776	2.26747	0.0233612	0.100684	LOC652276	Not Significant
ENSG00000149577	48.6111	1.1059	0.462172	2.39284	0.0167186	0.081734	SIDT2	Not Significant
ENSG00000006007	735.544	1.10457	0.318165	3.4717	0.000517169	0.00797781	GDE1	Enriched
ENSG00000244045	51.2465	1.10455	0.497153	2.22176	0.0262997	0.108903	TMEM199	Not Significant
ENSG00000120306	20.2801	1.1042	0.518458	2.12978	0.0331898	0.126435	CYSTM1	Not Significant
ENSG00000105137	12.2284	1.10353	0.711307	1.55141	0.120804	0.287879	SYDE1	Not Significant
ENSG00000238227	140.711	1.10298	0.465577	2.36906	0.0178331	0.0853477	TMEM250	Not Significant
ENSG00000122026	1475.3	1.1027	0.428919	2.57089	0.0101438	0.0585906	RPL21	Not Significant
ENSG00000145919	88.0787	1.10223	0.349705	3.15187	0.00162227	0.0172147	BOD1	Enriched
ENSG00000101255	220.922	1.10222	0.440665	2.50127	0.012375	0.0665298	TRIB3	Not Significant
ENSG00000183648	77.3054	1.10218	0.519247	2.12265	0.0337836	0.127949	NDUFB1	Not Significant
ENSG00000100116	59.9867	1.10119	0.399985	2.75308	0.00590382	0.0412366	GCAT	Enriched
ENSG00000175592	78.2187	1.10052	0.588306	1.87066	0.0613918	0.18683	FOSL1	Not Significant
ENSG00000242071	267.121	1.10049	0.351856	3.12766	0.00176205	0.0182082	RPL7AP6	Enriched
ENSG00000169718	581.736	1.09953	0.452932	2.42759	0.0151996	0.076298	DUS1L	Not Significant
ENSG00000167513	709.753	1.09924	0.217734	5.04856	4.45154e-07	3.56408e-05	CDT1	Enriched
ENSG00000230337	12.9437	1.09921	0.582166	1.88815	0.0590063	0.182719	EXOSC10-AS1	Not Significant
ENSG00000198736	25.5761	1.09919	0.503927	2.18124	0.0291655	0.116336	MSRB1	Not Significant
ENSG00000199753	12.6444	1.09913	0.996583	1.1029	0.270072	0.474119	SNORD104	Not Significant
ENSG00000103264	211.618	1.09863	0.316958	3.46618	0.000527918	0.00809689	FBXO31	Enriched
ENSG00000168286	205.052	1.09831	0.459704	2.38917	0.0168867	0.0822075	THAP11	Not Significant
ENSG00000184436	103.091	1.09826	0.557305	1.97067	0.0487622	0.161542	THAP7	Not Significant
ENSG00000233276	74.3178	1.09785	0.587829	1.86763	0.0618131	0.187427	GPX1	Not Significant
ENSG00000221988	94.5936	1.09744	0.451695	2.42961	0.0151153	0.0760786	PPT2	Not Significant
ENSG00000173171	46.1241	1.09715	0.393179	2.79047	0.00526311	0.0383269	MTX1	Enriched
ENSG00000103226	196.163	1.09704	0.335467	3.27019	0.00107476	0.0130064	NOMO3	Enriched
ENSG00000088298	211.773	1.09628	0.313641	3.49533	0.000473474	0.00747993	EDEM2	Enriched
ENSG00000104522	226.088	1.09607	0.4162	2.63351	0.00845067	0.0520367	GFUS	Not Significant
ENSG00000169230	271.226	1.09479	0.468761	2.33549	0.0195179	0.0897701	PRELID1	Not Significant
ENSG00000197756	3983.83	1.09423	0.410978	2.66252	0.00775586	0.0490681	RPL37A	Enriched
ENSG00000128272	1849.74	1.09415	0.363104	3.01333	0.00258398	0.0236389	ATF4	Enriched
ENSG00000115204	220.965	1.09402	0.340438	3.21358	0.00131093	0.014846	MPV17	Enriched
ENSG00000099901	959.542	1.09238	0.459103	2.37938	0.0173418	0.0837121	RANBP1	Not Significant
ENSG00000100804	406.656	1.09224	0.290238	3.76325	0.000167719	0.0034859	PSMB5	Enriched
ENSG00000240087	28.9803	1.09178	0.571226	1.9113	0.0559665	0.176703	RPSAP12	Not Significant
ENSG00000214784	32.3226	1.09166	0.558784	1.95364	0.0507438	0.165619	RPS3AP21	Not Significant
ENSG00000137817	258.434	1.09128	0.289769	3.76605	0.000165851	0.00346348	PARP6	Enriched
ENSG00000149925	82.0036	1.09083	0.348723	3.12806	0.00175966	0.0181961	ALDOA	Enriched
ENSG00000114650	1006.27	1.09077	0.294487	3.70395	0.000212268	0.00407521	SCAP	Enriched
ENSG00000143436	198.045	1.09054	0.319829	3.40975	0.000650229	0.00927643	MRPL9	Enriched
ENSG00000273730	58.9163	1.09012	0.82677	1.31852	0.187329	0.378627	LOC124907114	Not Significant
ENSG00000116221	1059.79	1.08998	0.324087	3.36324	0.000770331	0.0103611	MRPL37	Enriched
ENSG00000163541	358.166	1.08973	0.301325	3.61645	0.000298672	0.005281	SUCLG1	Enriched
ENSG00000165689	414.995	1.08961	0.355215	3.06747	0.00215881	0.020843	ENTR1	Enriched
ENSG00000143119	284.941	1.08936	0.34384	3.16822	0.00153375	0.0165566	CD53	Enriched
ENSG00000167553	966.489	1.08788	0.546175	1.99182	0.046391	0.156706	TUBA1C	Not Significant
ENSG00000166582	142.114	1.08779	0.348842	3.11827	0.00181913	0.0186439	CENPV	Enriched
ENSG00000081052	18.2395	1.08747	0.52198	2.08335	0.0372194	0.136781	COL4A4	Not Significant
ENSG00000101187	180.115	1.08717	0.309944	3.50764	0.000452099	0.00718852	SLCO4A1	Enriched
ENSG00000166707	14.0361	1.08663	0.654616	1.65994	0.0969257	0.250225	ZCCHC18	Not Significant
ENSG00000100294	60.2027	1.08628	0.406536	2.67204	0.00753907	0.0481435	MCAT	Enriched
ENSG00000143850	433.229	1.08521	0.277448	3.9114	9.17611e-05	0.00227792	PLEKHA6	Enriched
ENSG00000167468	231.969	1.08516	0.413501	2.62432	0.00868232	0.0531141	GPX4	Not Significant
ENSG00000099817	593.473	1.0847	0.400529	2.70816	0.00676565	0.0449067	POLR2E	Enriched
ENSG00000218426	36.1902	1.08425	0.513514	2.11143	0.0347357	0.130566	RPL27AP6	Not Significant
ENSG00000148288	514.985	1.08345	0.298302	3.63208	0.000281149	0.00507287	GBGT1	Enriched
ENSG00000048162	571.939	1.08275	0.38602	2.80491	0.00503313	0.0371027	NOP16	Enriched
ENSG00000140990	370.614	1.08254	0.397444	2.72374	0.00645463	0.0436539	NDUFB10	Enriched
ENSG00000172932	100.906	1.08243	0.521223	2.07672	0.0378279	0.138339	ANKRD13D	Not Significant
ENSG00000273619	12.9319	1.08111	0.655282	1.64984	0.0989756	0.252873	RPS21-DT	Not Significant
ENSG00000185164	314.44	1.081	0.344174	3.14087	0.00168449	0.0176377	NOMO2	Enriched
ENSG00000101365	1011.9	1.08099	0.298622	3.61992	0.00029469	0.0052291	IDH3B	Enriched
ENSG00000247077	671.778	1.08049	0.463124	2.33305	0.0196457	0.0901923	PGAM5	Not Significant
ENSG00000127884	217.363	1.08039	0.417711	2.58645	0.0096971	0.057131	ECHS1	Not Significant
ENSG00000007541	43.0004	1.08036	0.448526	2.4087	0.0160094	0.0791444	PIGQ	Not Significant
ENSG00000129824	1025.79	1.08018	0.32686	3.30472	0.000950712	0.0119991	RPS4Y1	Enriched
ENSG00000291104	51.1969	1.07996	0.367733	2.9368	0.00331619	0.0281079	BTN2A3P	Enriched
ENSG00000293311	14.8069	1.07992	0.710574	1.51978	0.128567	0.299602	SMPD4BP	Not Significant
ENSG00000269439	13.1158	1.07985	0.595891	1.81216	0.069962	0.203401	PGLS-DT	Not Significant
ENSG00000213942	20.1828	1.07982	0.465527	2.31957	0.0203641	0.0925271	RPL31P10	Not Significant
ENSG00000176946	506.056	1.07916	0.347888	3.10204	0.00192194	0.0192881	THAP4	Enriched
ENSG00000189376	25.2941	1.07905	0.585891	1.84172	0.0655158	0.195452	C8orf76	Not Significant
ENSG00000197136	838.704	1.07851	0.283455	3.80485	0.000141888	0.00310579	PCNX3	Enriched
ENSG00000118894	37.4139	1.07796	0.441392	2.44219	0.0145986	0.0743263	EEF2KMT	Not Significant
ENSG00000106004	49.9233	1.07795	0.34371	3.13622	0.00171141	0.0178695	HOXA5	Enriched
ENSG00000202538	2527.02	1.07763	0.828991	1.29993	0.193625	0.386134	RNU4-2	Not Significant
ENSG00000132330	47.65	1.07752	0.535948	2.0105	0.0443785	0.15307	SCLY	Not Significant
ENSG00000039650	96.126	1.07751	0.473529	2.27548	0.0228773	0.0990896	PNKP	Not Significant
ENSG00000139405	167.863	1.07713	0.375828	2.86602	0.00415665	0.0325456	RITA1	Enriched
ENSG00000143575	537.211	1.07677	0.461586	2.33276	0.0196605	0.0902325	HAX1	Not Significant
ENSG00000137642	19.8622	1.07674	0.671886	1.60256	0.109031	0.269193	SORL1	Not Significant
ENSG00000138617	41.5643	1.07631	0.368213	2.92307	0.00346597	0.0289358	PARP16	Enriched
ENSG00000278637	689.119	1.07549	0.418664	2.56886	0.0102034	0.0587746	H4C1	Not Significant
ENSG00000129255	160.068	1.07523	0.442243	2.4313	0.0150447	0.0758871	MPDU1	Not Significant
ENSG00000213609	11.8707	1.07488	0.571763	1.87995	0.0601154	0.18434	RPL7AP50	Not Significant
ENSG00000144504	247.31	1.07482	0.252124	4.26305	2.01655e-05	0.000706451	ANKMY1	Enriched
ENSG00000132661	54.5902	1.07447	0.56889	1.88871	0.0589301	0.182599	NXT1	Not Significant
ENSG00000274736	19.0959	1.07434	0.743836	1.44432	0.148648	0.329075	CCL23	Not Significant
ENSG00000160917	152.124	1.07403	0.415516	2.58481	0.00974334	0.057246	CPSF4	Not Significant
ENSG00000143590	11.5285	1.07386	0.636152	1.68806	0.0913999	0.24124	EFNA3	Not Significant
ENSG00000227500	102.098	1.07343	0.507424	2.11546	0.0343911	0.12953	SCAMP4	Not Significant
ENSG00000164897	110.541	1.07336	0.439236	2.4437	0.0145375	0.0740911	TMUB1	Not Significant
ENSG00000137970	930.497	1.07319	0.430808	2.49112	0.0127342	0.0679652	RPL7P9	Not Significant
ENSG00000178149	33.9088	1.07277	0.504326	2.12714	0.0334081	0.127044	DALRD3	Not Significant
ENSG00000204310	284.277	1.07276	0.330887	3.24207	0.00118664	0.0138679	AGPAT1	Enriched
ENSG00000180817	7645.09	1.07186	0.412125	2.60081	0.00930036	0.0556019	PPA1	Not Significant
ENSG00000114902	370.431	1.07169	0.487659	2.19763	0.0279758	0.113492	SPCS1	Not Significant
ENSG00000215375	16.0797	1.07123	0.581726	1.84147	0.065553	0.195525	MYL5	Not Significant
ENSG00000167085	722.68	1.07117	0.264242	4.05375	5.04028e-05	0.00143404	PHB1	Enriched
ENSG00000141873	279.367	1.0711	0.429167	2.49576	0.0125689	0.0673088	SLC39A3	Not Significant
ENSG00000163703	13.6521	1.07101	0.59017	1.81475	0.0695627	0.202805	CRELD1	Not Significant
ENSG00000173272	184.198	1.07066	0.431883	2.47905	0.0131734	0.069452	MZT2A	Not Significant
ENSG00000159069	203.633	1.06972	0.400075	2.6738	0.00749962	0.0479733	FBXW5	Enriched
ENSG00000244716	30.9476	1.06942	0.624686	1.71194	0.0869079	0.233815	RPL17P7	Not Significant
ENSG00000006194	293.12	1.06935	0.316369	3.38006	0.000724703	0.00998732	ZNF263	Enriched
ENSG00000198088	12.6601	1.06916	0.759606	1.40752	0.159274	0.34352	NUP62CL	Not Significant
ENSG00000293510	82.4367	1.06905	0.326885	3.27042	0.00107389	0.0130064	AFG3L1P	Enriched
ENSG00000100575	95.9145	1.06901	0.356833	2.99583	0.00273695	0.0246828	TIMM9	Enriched
ENSG00000123427	82.4673	1.06893	0.327504	3.26388	0.00109898	0.0131824	EEF1AKMT3	Enriched
ENSG00000065268	204.107	1.06692	0.346995	3.07473	0.00210694	0.0205674	WDR18	Enriched
ENSG00000130005	84.2682	1.06681	0.488051	2.18585	0.0288266	0.115454	GAMT	Not Significant
ENSG00000111725	190.939	1.06671	0.376142	2.83592	0.00456937	0.0347253	PRKAB1	Enriched
ENSG00000235173	441.034	1.06603	0.299355	3.56109	0.000369324	0.00619423	HGH1	Enriched
ENSG00000150779	176.133	1.06582	0.628974	1.69453	0.0901645	0.239449	TIMM8B	Not Significant
ENSG00000108528	277.858	1.06579	0.494056	2.15722	0.0309883	0.121	SLC25A11	Not Significant
ENSG00000102978	331.206	1.0652	0.399279	2.6678	0.00763489	0.0485898	POLR2C	Enriched
ENSG00000108479	124.57	1.06479	0.412085	2.5839	0.009769	0.0573518	GALK1	Not Significant
ENSG00000130748	74.3514	1.06461	0.403287	2.63984	0.00829458	0.0515004	TMEM160	Not Significant
ENSG00000224831	16.8523	1.0645	0.626752	1.69844	0.0894242	0.238168	TMEM183BP	Not Significant
ENSG00000197363	46.4014	1.06399	0.41213	2.58168	0.00983221	0.0575875	ZNF517	Not Significant
ENSG00000250361	243.671	1.06396	0.459588	2.31503	0.0206115	0.0931148	GYPB	Not Significant
ENSG00000130810	259.737	1.06346	0.282512	3.76432	0.000167004	0.00348269	PPAN	Enriched
ENSG00000100316	15869.4	1.06336	0.255183	4.16705	3.08563e-05	0.000999264	RPL3	Enriched
ENSG00000072506	222.797	1.06272	0.331104	3.20963	0.00132907	0.0150055	HSD17B10	Enriched
ENSG00000105771	547.548	1.06195	0.231895	4.57942	4.66275e-06	0.00023227	SMG9	Enriched
ENSG00000167118	386.536	1.06048	0.440156	2.40933	0.015982	0.0790886	URM1	Not Significant
ENSG00000198355	241.437	1.0602	0.470362	2.25401	0.0241958	0.103271	PIM3	Not Significant
ENSG00000175283	30.0761	1.06015	0.48977	2.16458	0.0304198	0.119651	DOLK	Not Significant
ENSG00000146067	107.517	1.05991	0.325083	3.26044	0.0011124	0.013273	FAM193B	Enriched
ENSG00000214212	8.91899	1.05975	0.687797	1.54079	0.123367	NA	C19orf38	Not Significant
ENSG00000271254	26.4477	1.05889	0.5625	1.88247	0.0597719	0.183915	LOC124905564	Not Significant
ENSG00000068028	514.767	1.05832	0.356325	2.97011	0.0029769	0.0260693	RASSF1	Enriched
ENSG00000107404	432.279	1.05824	0.361597	2.92658	0.00342713	0.0287235	DVL1	Enriched
ENSG00000143947	3255.9	1.05796	0.410466	2.57746	0.0099529	0.0580225	RPS27A	Not Significant
ENSG00000223662	17.6571	1.05754	0.533909	1.98075	0.047619	0.159398	SAMSN1-AS1	Not Significant
ENSG00000125877	254.386	1.05729	0.428934	2.46492	0.0137045	0.0715761	ITPA	Not Significant
ENSG00000088682	205.978	1.05704	0.395655	2.67161	0.00754883	0.0481443	COQ9	Enriched
ENSG00000174744	204.72	1.05681	0.305592	3.45824	0.000543709	0.00821812	BRMS1	Enriched
ENSG00000105928	646.59	1.05641	0.489445	2.15838	0.0308984	0.120799	GSDME	Not Significant
ENSG00000180211	285.098	1.05629	0.504438	2.09399	0.0362606	0.134479	RPL23P6	Not Significant
ENSG00000173567	11.3838	1.05611	0.573023	1.84305	0.0653221	0.194991	ADGRF3	Not Significant
ENSG00000105085	79.4271	1.05579	0.386055	2.73481	0.00624169	0.0427342	MED26	Enriched
ENSG00000130731	99.1125	1.0555	0.476251	2.21626	0.0266735	0.109844	METTL26	Not Significant
ENSG00000205937	881.562	1.05503	0.343026	3.07566	0.0021004	0.0205169	RNPS1	Enriched
ENSG00000064995	381.766	1.05413	0.286343	3.68135	0.000231998	0.00437557	TAF11	Enriched
ENSG00000140691	36.9771	1.05381	0.40496	2.60226	0.00926118	0.0554783	ARMC5	Not Significant
ENSG00000138796	293.049	1.0537	0.291489	3.61488	0.000300484	0.00530426	HADH	Enriched
ENSG00000100350	286.52	1.05326	0.363289	2.89923	0.00374077	0.0304832	FOXRED2	Enriched
ENSG00000177951	174.222	1.0531	0.403317	2.61111	0.00902495	0.0544548	BET1L	Not Significant
ENSG00000107262	1311.12	1.05287	0.227734	4.62326	3.77757e-06	0.00019667	BAG1	Enriched
ENSG00000178307	70.4926	1.05243	0.347574	3.02792	0.00246243	0.0229042	TMEM11	Enriched
ENSG00000241685	66.74	1.0523	0.553381	1.90159	0.0572251	0.179253	ARPC1A	Not Significant
ENSG00000100129	1484.93	1.0521	0.233412	4.5075	6.55972e-06	0.000300784	EIF3L	Enriched
ENSG00000189077	18.5702	1.05183	0.611857	1.71909	0.0855987	0.231822	TMEM120A	Not Significant
ENSG00000291081	16.7735	1.05163	0.562584	1.86929	0.0615824	0.187101	FAM86HP	Not Significant
ENSG00000149541	85.8156	1.05157	0.460325	2.2844	0.0223479	0.0977206	B3GAT3	Not Significant
ENSG00000164161	25.4177	1.05109	0.483465	2.17408	0.0296993	0.117802	HHIP	Not Significant
ENSG00000119523	258.05	1.05048	0.46845	2.24246	0.0249315	0.105302	ALG2	Not Significant
ENSG00000204386	303.916	1.05044	0.415432	2.52855	0.0114535	0.0633706	NEU1	Not Significant
ENSG00000200394	17.4461	1.05031	0.781336	1.34425	0.178868	0.368856	SNORA38B	Not Significant
ENSG00000165271	912.054	1.05031	0.286674	3.66377	0.000248527	0.0046119	NOL6	Enriched
ENSG00000100387	78.5157	1.05014	0.642929	1.63336	0.102392	0.257942	RBX1	Not Significant
ENSG00000169567	1108.51	1.04995	0.45247	2.32048	0.0203152	0.0923607	HINT1	Not Significant
ENSG00000198208	50.1488	1.04954	0.436786	2.40288	0.0162666	0.0800297	RPS6KL1	Not Significant
ENSG00000123131	165.747	1.04954	0.418156	2.50992	0.012076	0.0655567	PRDX4	Not Significant
ENSG00000276966	2127.94	1.04945	0.369676	2.83883	0.00452797	0.0345157	H4C5	Enriched
ENSG00000100151	37.5353	1.04929	0.379988	2.76137	0.00575593	0.0405657	PICK1	Enriched
ENSG00000087086	2580.04	1.04912	0.383804	2.73348	0.00626694	0.0428289	FTL	Enriched
ENSG00000099821	479.556	1.04896	0.233433	4.49362	7.00213e-06	0.000314341	POLRMT	Enriched
ENSG00000080823	30.3794	1.0485	0.506943	2.06828	0.038614	0.140148	MOK	Not Significant
ENSG00000090104	13.1673	1.04849	0.607676	1.72541	0.0844544	0.229862	RGS1	Not Significant
ENSG00000108591	76.0013	1.04819	0.44041	2.38002	0.0173115	0.0836508	DRG2	Not Significant
ENSG00000161677	14.9242	1.04817	0.733451	1.42909	0.152979	0.335157	JOSD2	Not Significant
ENSG00000275757	3019.63	1.04816	0.550552	1.90383	0.056933	0.178514	LOC124907114	Not Significant
ENSG00000108839	112.286	1.04806	0.291082	3.60055	0.000317545	0.0055021	ALOX12	Enriched
ENSG00000099949	61.3301	1.04781	0.396923	2.63983	0.00829488	0.0515004	LZTR1	Not Significant
ENSG00000135409	152.038	1.0478	0.379039	2.76436	0.00570343	0.0404514	AMHR2	Enriched
ENSG00000081181	144.481	1.04762	0.288935	3.62578	0.000288086	0.00515418	ARG2	Enriched
ENSG00000273899	11.2286	1.04748	0.750523	1.39566	0.162817	0.348397	NOL12	Not Significant
ENSG00000126457	1216.01	1.04732	0.380055	2.7557	0.00585661	0.0410346	PRMT1	Enriched
ENSG00000221676	206.592	1.04725	0.752708	1.39131	0.164132	0.350071	RNU6ATAC	Not Significant
ENSG00000188186	110.231	1.04643	0.44361	2.3589	0.0183294	0.0866427	LAMTOR4	Not Significant
ENSG00000169692	167.874	1.04618	0.480071	2.17923	0.0293149	0.116715	AGPAT2	Not Significant
ENSG00000197417	47.1807	1.04614	0.347124	3.01375	0.00258044	0.0236209	SHPK	Enriched
ENSG00000112651	59.0046	1.04564	0.438819	2.38285	0.0171792	0.0831455	MRPL2	Not Significant
ENSG00000126934	335.411	1.04513	0.430855	2.4257	0.0152789	0.0765423	MAP2K2	Not Significant
ENSG00000181817	224.286	1.04468	0.535734	1.95	0.0511763	0.166556	LSM10	Not Significant
ENSG00000002549	1456.44	1.04362	0.262857	3.97029	7.17856e-05	0.00187845	LAP3	Enriched
ENSG00000110651	322.922	1.04352	0.373309	2.79533	0.00518463	0.0379582	CD81	Enriched
ENSG00000179598	213.511	1.04306	0.512618	2.03476	0.0418751	0.14725	PLD6	Not Significant
ENSG00000099797	291.438	1.04283	0.335988	3.10377	0.00191074	0.0192881	TECR	Enriched
ENSG00000131143	674.46	1.04225	0.400709	2.601	0.00929514	0.0556019	COX4I1	Not Significant
ENSG00000149932	100.068	1.04201	0.579195	1.79907	0.0720076	0.207432	TMEM219	Not Significant
ENSG00000126903	47.1446	1.04167	0.522759	1.99264	0.0463005	0.156644	SLC10A3	Not Significant
ENSG00000229132	48.4088	1.03988	0.36279	2.86635	0.00415232	0.0325456	EIF4A1P10	Enriched
ENSG00000166289	27.459	1.03941	0.612668	1.69653	0.0897852	0.238822	PLEKHF1	Not Significant
ENSG00000184967	215.733	1.03934	0.320889	3.23893	0.0011998	0.0139364	NOC4L	Enriched
ENSG00000146576	71.9173	1.03922	0.564887	1.8397	0.0658129	0.195949	INTS15	Not Significant
ENSG00000172613	75.8532	1.0381	0.444065	2.33773	0.0194014	0.0894541	RAD9A	Not Significant
ENSG00000145425	2818.63	1.03774	0.424286	2.44585	0.0144512	0.073842	RPS3A	Not Significant
ENSG00000157593	315.094	1.03729	0.460598	2.25205	0.0243191	0.103621	SLC35B2	Not Significant
ENSG00000198715	39.3838	1.03688	0.390392	2.65599	0.00790762	0.049839	GLMP	Enriched
ENSG00000185917	134.665	1.03668	0.277695	3.73316	0.000189089	0.00378532	SETD4	Enriched
ENSG00000117262	72.9729	1.03664	0.450499	2.30109	0.0213865	0.0952388	GPR89B	Not Significant
ENSG00000110881	212.148	1.03587	0.311664	3.32367	0.000888401	0.0113852	ASIC1	Enriched
ENSG00000184831	44.2178	1.03546	0.472206	2.19281	0.0283214	0.114252	APOO	Not Significant
ENSG00000103495	308.523	1.03544	0.470221	2.20203	0.0276631	0.11262	MAZ	Not Significant
ENSG00000197620	49.8539	1.03364	0.395005	2.61677	0.00887659	0.0538755	EOLA1	Not Significant
ENSG00000136059	92.2341	1.03352	0.399666	2.58597	0.00971064	0.0571883	VILL	Not Significant
ENSG00000168653	415.976	1.03313	0.451836	2.28653	0.0222234	0.097432	NDUFS5	Not Significant
ENSG00000104356	1925.34	1.0331	0.404202	2.55589	0.0105916	0.060178	POP1	Not Significant
ENSG00000123358	58.0053	1.03243	0.454473	2.2717	0.0231046	0.0998072	NR4A1	Not Significant
ENSG00000090581	81.6511	1.03212	0.389602	2.64915	0.00806943	0.0504768	GNPTG	Not Significant
ENSG00000125485	371.948	1.03156	0.262974	3.92266	8.75764e-05	0.00219444	DDX31	Enriched
ENSG00000162062	55.4917	1.03133	0.496057	2.07905	0.0376124	0.137686	TEDC2	Not Significant
ENSG00000089693	833.94	1.03122	0.388364	2.6553	0.00792388	0.0499107	MLF2	Enriched
ENSG00000084623	1335.08	1.03115	0.363804	2.83435	0.00459195	0.0347911	EIF3I	Enriched
ENSG00000105393	58.927	1.03109	0.441328	2.33633	0.019474	0.0896508	BABAM1	Not Significant
ENSG00000132768	428.386	1.03099	0.482973	2.13468	0.0327872	0.125539	DPH2	Not Significant
ENSG00000005486	37.6424	1.03049	0.460326	2.23861	0.0251813	0.106237	RHBDD2	Not Significant
ENSG00000257727	71.9455	1.03012	0.556634	1.85062	0.0642244	0.192971	CNPY2	Not Significant
ENSG00000007923	1259.88	1.02947	0.275889	3.73146	0.00019037	0.00380587	DNAJC11	Enriched
ENSG00000089327	502.176	1.02929	0.395895	2.59991	0.00932478	0.0557035	FXYD5	Not Significant
ENSG00000138030	153.127	1.02792	0.280213	3.66836	0.000244112	0.00455111	KHK	Enriched
ENSG00000182952	588.207	1.02789	0.436763	2.35344	0.0186008	0.08732	HMGN4	Not Significant
ENSG00000167615	580.972	1.02783	0.284348	3.61469	0.000300712	0.00530426	LENG8	Enriched
ENSG00000088766	35.1099	1.02754	0.492839	2.08495	0.0370737	0.136528	CRLS1	Not Significant
ENSG00000149516	1376.98	1.02731	0.313606	3.2758	0.00105363	0.012865	MS4A3	Enriched
ENSG00000242562	9.69283	1.0269	0.63115	1.62703	0.103731	0.260244	DCAF13P1	Not Significant
ENSG00000134815	465.66	1.02651	0.242231	4.23774	2.25777e-05	0.000776446	DHX34	Enriched
ENSG00000013583	106.86	1.02649	0.320887	3.19892	0.00137943	0.0154122	HEBP1	Enriched
ENSG00000153395	891.134	1.02634	0.324883	3.15911	0.0015825	0.0169243	LPCAT1	Enriched
ENSG00000236824	20.0848	1.02621	0.647557	1.58474	0.113026	0.275923	BCYRN1	Not Significant
ENSG00000146701	1131.4	1.02568	0.233565	4.39141	1.12618e-05	0.000449093	MDH2	Enriched
ENSG00000151726	2076.38	1.02541	0.373864	2.74274	0.00609298	0.0421718	ACSL1	Enriched
ENSG00000131584	69.7787	1.02515	0.315564	3.24864	0.00115959	0.0136475	ACAP3	Enriched
ENSG00000131238	1252.78	1.02452	0.29592	3.46216	0.000535862	0.00812801	PPT1	Enriched
ENSG00000172922	118.702	1.02451	0.51718	1.98096	0.0475958	0.159368	RNASEH2C	Not Significant
ENSG00000166780	77.9978	1.02405	0.448899	2.28125	0.0225339	0.0982188	BMERB1	Not Significant
ENSG00000127452	277.154	1.02382	0.396512	2.58206	0.00982126	0.0575459	FBXL12	Not Significant
ENSG00000172500	253.633	1.02357	0.361046	2.83502	0.00458235	0.0347535	FIBP	Enriched
ENSG00000115946	270.328	1.02312	0.483595	2.11566	0.0343741	0.129499	PNO1	Not Significant
ENSG00000152082	116.838	1.02308	0.542374	1.88629	0.0592553	0.182927	MZT2B	Not Significant
ENSG00000123411	93.7618	1.02281	0.433671	2.35849	0.0183495	0.0867105	IKZF4	Not Significant
ENSG00000154803	194.518	1.02207	0.313859	3.25646	0.0011281	0.0133877	FLCN	Enriched
ENSG00000124575	2373.62	1.02197	0.354345	2.88411	0.00392524	0.0313726	H1-3	Enriched
ENSG00000123395	61.411	1.02194	0.466266	2.19174	0.028398	0.114416	ATG101	Not Significant
ENSG00000177721	18.6591	1.02181	0.665339	1.53577	0.124594	0.293347	ANXA2R	Not Significant
ENSG00000115211	459.846	1.02135	0.25685	3.97644	6.99546e-05	0.00184991	EIF2B4	Enriched
ENSG00000107819	17.4752	1.02113	0.594826	1.71668	0.0860369	0.232439	SFXN3	Not Significant
ENSG00000196372	210.564	1.02095	0.303588	3.36293	0.000771198	0.0103614	ASB13	Enriched
ENSG00000208772	24.7883	1.02071	0.817449	1.24865	0.211793	0.408704	SNORD94	Not Significant
ENSG00000105438	391.341	1.02037	0.43387	2.35179	0.0186833	0.0875976	KDELR1	Not Significant
ENSG00000134905	606.126	1.02022	0.300236	3.39806	0.000678662	0.00959082	CARS2	Enriched
ENSG00000213465	71.9143	1.02009	0.3979	2.56368	0.010357	0.059408	ARL2	Not Significant
ENSG00000139546	148.298	1.01999	0.501547	2.03368	0.0419834	0.147517	TARBP2	Not Significant
ENSG00000130305	125.353	1.01953	0.328161	3.10681	0.0018912	0.0191822	NSUN5	Enriched
ENSG00000168395	497.902	1.01922	0.247877	4.11182	3.92557e-05	0.00117018	ING5	Enriched
ENSG00000253506	15.9843	1.01918	0.533326	1.91099	0.056006	0.176753	NACA2	Not Significant
ENSG00000163013	743.695	1.01888	0.236578	4.30674	1.65677e-05	0.000613373	FBXO41	Enriched
ENSG00000164032	1195.4	1.018	0.52888	1.92483	0.054251	0.173132	H2AZ1	Not Significant
ENSG00000224877	147.924	1.018	0.588375	1.73019	0.083596	0.228188	NDUFAF8	Not Significant
ENSG00000143977	432.677	1.01648	0.606978	1.67465	0.0940023	0.245467	SNRPG	Not Significant
ENSG00000147604	8744.04	1.01638	0.404845	2.51054	0.0120545	0.0654637	RPL7	Not Significant
ENSG00000184752	225.91	1.01611	0.399361	2.54433	0.0109488	0.0613933	NDUFA12	Not Significant
ENSG00000167792	638.337	1.01584	0.227761	4.46014	8.19078e-06	0.000349893	NDUFV1	Enriched
ENSG00000123975	239.163	1.01577	0.73306	1.38566	0.165851	0.35209	CKS2	Not Significant
ENSG00000147804	25.9405	1.01576	0.462295	2.1972	0.028006	0.113503	SLC39A4	Not Significant
ENSG00000161996	99.8021	1.01565	0.357841	2.83827	0.00453593	0.0345588	WDR90	Enriched
ENSG00000173264	140.225	1.01497	0.436044	2.32767	0.0199298	0.0911615	GPR137	Not Significant
ENSG00000156298	38.4134	1.01443	0.41441	2.44788	0.01437	0.0736628	TSPAN7	Not Significant
ENSG00000186283	252.062	1.014	0.383089	2.64691	0.00812316	0.0507832	TOR3A	Not Significant
ENSG00000168701	72.1932	1.01344	0.593544	1.70743	0.0877414	0.235056	TMEM208	Not Significant
ENSG00000179085	22.5741	1.01305	0.548017	1.84858	0.0645187	0.193401	DPM3	Not Significant
ENSG00000162073	50.1192	1.01285	0.34037	2.97574	0.00292281	0.0258096	PAQR4	Enriched
ENSG00000075618	1112.96	1.01279	0.31674	3.19755	0.00138601	0.0154458	FSCN1	Enriched
ENSG00000126215	117.947	1.01254	0.436741	2.3184	0.0204275	0.0926762	XRCC3	Not Significant
ENSG00000168061	60.3533	1.01253	0.556623	1.81906	0.0689016	0.201661	SAC3D1	Not Significant
ENSG00000146670	1446.27	1.01227	0.23723	4.26702	1.98098e-05	0.000695618	CDCA5	Enriched
ENSG00000173917	103.4	1.01226	0.388914	2.60279	0.00924698	0.0554375	HOXB2	Not Significant
ENSG00000076604	287.909	1.01221	0.580364	1.74409	0.0811429	0.223896	TRAF4	Not Significant
ENSG00000185825	551.379	1.01136	0.338848	2.9847	0.00283857	0.0253342	BCAP31	Enriched
ENSG00000111481	438.078	1.01132	0.369401	2.73773	0.00618649	0.0425701	COPZ1	Enriched
ENSG00000148331	102.961	1.01103	0.32953	3.06809	0.00215429	0.020843	ASB6	Enriched
ENSG00000260279	15.3723	1.01097	0.526243	1.92111	0.0547182	0.17415	LOC105371414	Not Significant
ENSG00000242299	33.7389	1.01037	0.581058	1.73885	0.0820606	0.225475	RPS18P5	Not Significant
ENSG00000104866	105.774	1.00936	0.360866	2.79704	0.00515736	0.0377978	PPP1R37	Enriched
ENSG00000007520	88.6212	1.00912	0.342422	2.94702	0.00320856	0.0275488	TSR3	Enriched
ENSG00000164300	266.672	1.0083	0.281532	3.58147	0.000341668	0.00584146	SERINC5	Enriched
ENSG00000107872	53.7263	1.008	0.461695	2.18327	0.0290162	0.115956	FBXL15	Not Significant
ENSG00000168003	773.163	1.0075	0.330085	3.05223	0.00227146	0.0215832	SLC3A2	Enriched
ENSG00000165782	126.429	1.00708	0.554175	1.81726	0.0691766	0.202249	PIP4P1	Not Significant
ENSG00000006025	41.7046	1.00666	0.393488	2.5583	0.0105185	0.0599901	OSBPL7	Not Significant
ENSG00000186866	266.482	1.00653	0.241141	4.17403	2.9926e-05	0.000977583	POFUT2	Enriched
ENSG00000085978	282.24	1.00627	0.318287	3.16151	0.00156954	0.0168339	ATG16L1	Enriched
ENSG00000179933	120.7	1.00593	0.551528	1.8239	0.0681672	0.200275	C14orf119	Not Significant
ENSG00000099849	23.4329	1.00584	0.530588	1.89571	0.0579978	0.180832	RASSF7	Not Significant
ENSG00000164087	152.565	1.00556	0.361681	2.78023	0.00543204	0.0390549	POC1A	Enriched
ENSG00000049541	297.17	1.00476	0.260592	3.85567	0.000115415	0.00268299	RFC2	Enriched
ENSG00000178409	242.794	1.00397	0.399175	2.51511	0.0118996	0.0649521	BEND3	Not Significant
ENSG00000167106	22.8433	1.0039	0.609048	1.64831	0.0992888	0.253359	EEIG1	Not Significant
ENSG00000198680	328.153	1.00379	0.488031	2.05682	0.0397034	0.142624	TUSC1	Not Significant
ENSG00000257698	105.411	1.00373	0.417742	2.40275	0.0162721	0.0800297	GIHCG	Not Significant
ENSG00000111684	132.93	1.0036	0.370263	2.71052	0.00671784	0.044728	LPCAT3	Enriched
ENSG00000104957	37.2783	1.00359	0.374102	2.68265	0.00730407	0.0471327	YJU2B	Enriched
ENSG00000117682	427.28	1.00331	0.276071	3.63427	0.000278774	0.00504823	DHDDS	Enriched
ENSG00000100365	298.782	1.00314	0.261136	3.84143	0.000122319	0.00280248	NCF4	Enriched
ENSG00000288920	24.0354	1.00307	0.562618	1.78287	0.0746076	0.212423	RPSA2	Not Significant
ENSG00000168101	51.5942	1.00193	0.512294	1.95578	0.0504913	0.165118	NUDT16L1	Not Significant
ENSG00000132591	406.556	1.00187	0.371673	2.69556	0.00702708	0.0461191	ERAL1	Enriched
ENSG00000181026	563.812	1.00114	0.410942	2.43621	0.0148421	0.075228	AEN	Not Significant
ENSG00000129911	276.491	1.00088	0.255779	3.91308	9.11274e-05	0.00226594	KLF16	Enriched
ENSG00000103260	12.7267	1.00002	0.608996	1.64208	0.100573	0.255462	METRN	Not Significant
ENSG00000106605	432.652	0.999941	0.280848	3.56043	0.000370245	0.00619582	BLVRA	Enriched
ENSG00000232303	9.74525	0.999909	0.601063	1.66357	0.0961986	0.249049	DFFBP1	Not Significant
ENSG00000103423	1163.75	0.999739	0.349346	2.86174	0.00421319	0.0327828	DNAJA3	Enriched
ENSG00000143774	266.078	0.99898	0.52005	1.92093	0.0547405	0.174152	GUK1	Not Significant
ENSG00000291137	11.5776	0.998924	0.604651	1.65207	0.0985209	0.25226	GBA1LP	Not Significant
ENSG00000100097	110.288	0.998516	0.474217	2.10561	0.0352382	0.131827	LGALS1	Not Significant
ENSG00000105669	177.129	0.998358	0.364964	2.7355	0.00622865	0.0427155	COPE	Enriched
ENSG00000241061	11.7716	0.997608	0.642855	1.55184	0.120701	0.287816	RPL5P1	Not Significant
ENSG00000102393	100.785	0.997325	0.372041	2.68069	0.00734711	0.0473156	GLA	Enriched
ENSG00000173221	69.702	0.997284	0.532163	1.87402	0.060928	0.185946	GLRX	Not Significant
ENSG00000168393	387.842	0.99719	0.55047	1.81152	0.0700597	0.203541	DTYMK	Not Significant
ENSG00000101199	190.009	0.996551	0.313964	3.17409	0.00150305	0.0163148	ARFGAP1	Enriched
ENSG00000142546	193.5	0.996228	0.411089	2.42339	0.0153764	0.0768513	NOSIP	Not Significant
ENSG00000099904	112.819	0.995956	0.296401	3.36017	0.000778953	0.0104189	ZDHHC8	Enriched
ENSG00000240395	39.311	0.995751	0.548066	1.81684	0.0692409	0.202315	RPL5P23	Not Significant
ENSG00000111696	1742.6	0.995653	0.247386	4.0247	5.70486e-05	0.00156664	NT5DC3	Enriched
ENSG00000166886	156.172	0.995614	0.386414	2.57655	0.00997924	0.0581083	NAB2	Not Significant
ENSG00000143368	659.917	0.995327	0.343934	2.89395	0.00380427	0.0308164	SF3B4	Enriched
ENSG00000110108	427.898	0.994982	0.392156	2.53721	0.0111741	0.0622843	TMEM109	Not Significant
ENSG00000168282	33.3055	0.99449	0.605666	1.64198	0.100595	0.255474	MGAT2	Not Significant
ENSG00000058262	2067.94	0.994169	0.344428	2.88643	0.00389637	0.031292	SEC61A1	Enriched
ENSG00000118402	11.3598	0.99397	0.779373	1.27535	0.202186	0.396389	ELOVL4	Not Significant
ENSG00000055118	562.422	0.993302	0.274598	3.6173	0.000297695	0.00526995	KCNH2	Enriched
ENSG00000187479	9.43726	0.99252	0.7173	1.38369	0.166454	0.352964	C11orf96	Not Significant
ENSG00000169951	89.7903	0.990643	0.334512	2.96146	0.00306187	0.0264762	ZNF764	Enriched
ENSG00000141522	1171.64	0.99061	0.487883	2.03042	0.0423134	0.148409	ARHGDIA	Not Significant
ENSG00000133619	109.428	0.990315	0.329787	3.00289	0.00267428	0.0242578	KRBA1	Enriched
ENSG00000184270	468.922	0.990166	0.424094	2.33478	0.0195549	0.0898299	H2AC21	Not Significant
ENSG00000100462	514.225	0.989723	0.228934	4.32317	1.53801e-05	0.000576523	PRMT5	Enriched
ENSG00000184216	1089.81	0.989626	0.419051	2.36159	0.0181969	0.0862985	IRAK1	Not Significant
ENSG00000101444	3305.79	0.989489	0.251259	3.93812	8.2123e-05	0.00209414	AHCY	Enriched
ENSG00000147655	16.6405	0.988564	0.554385	1.78317	0.0745584	0.212412	RSPO2	Not Significant
ENSG00000122705	640.154	0.988378	0.339969	2.90726	0.00364606	0.0299392	CLTA	Enriched
ENSG00000002330	31.6417	0.988327	0.560578	1.76305	0.077892	0.217935	BAD	Not Significant
ENSG00000143256	570.179	0.988171	0.490054	2.01645	0.0437526	0.151766	PFDN2	Not Significant
ENSG00000164818	449.985	0.987238	0.250659	3.93857	8.19689e-05	0.00209377	DNAAF5	Enriched
ENSG00000102225	331.867	0.987095	0.293289	3.36561	0.000763747	0.0103158	CDK16	Enriched
ENSG00000160957	540.051	0.987	0.262846	3.75505	0.000173309	0.00355485	RECQL4	Enriched
ENSG00000132382	2002	0.986475	0.279443	3.53014	0.00041534	0.00676914	MYBBP1A	Enriched
ENSG00000114790	10.7374	0.986231	0.64695	1.52443	0.127401	0.297919	ARHGEF26	Not Significant
ENSG00000008394	782.535	0.985868	0.552178	1.78542	0.0741936	0.211695	MGST1	Not Significant
ENSG00000102898	447.178	0.985867	0.381041	2.5873	0.00967309	0.0570119	NUTF2	Not Significant
ENSG00000122122	395.689	0.985698	0.265107	3.71812	0.000200712	0.00392882	SASH3	Enriched
ENSG00000161204	440.782	0.985571	0.314717	3.13161	0.00173853	0.0180648	ABCF3	Enriched
ENSG00000160124	91.5638	0.985373	0.398896	2.47025	0.0135017	0.0708592	MIX23	Not Significant
ENSG00000203993	62.1431	0.985257	0.393152	2.50604	0.0122091	0.0658975	ARRDC1-AS1	Not Significant
ENSG00000149792	376.048	0.984791	0.48476	2.0315	0.0422042	0.14806	MRPL49	Not Significant
ENSG00000166833	13.7837	0.984742	0.552704	1.78168	0.0748012	0.212741	NAV2	Not Significant
ENSG00000197362	107.539	0.984421	0.281937	3.49164	0.000480067	0.0075373	ZNF786	Enriched
ENSG00000173540	171.573	0.98394	0.343345	2.86575	0.00416028	0.0325571	GMPPB	Enriched
ENSG00000200534	42.5628	0.983868	0.61712	1.59429	0.110871	0.272257	SNORA33	Not Significant
ENSG00000200792	15.4465	0.983782	0.812285	1.21113	0.225845	0.42595	SNORA80A	Not Significant
ENSG00000171222	143.098	0.983734	0.472489	2.08203	0.0373401	0.137033	SCAND1	Not Significant
ENSG00000189159	619.756	0.982966	0.399161	2.46258	0.0137942	0.0718907	JPT1	Not Significant
ENSG00000168275	78.5768	0.982788	0.554402	1.7727	0.0762785	0.21498	COA6	Not Significant
ENSG00000069011	915.645	0.982549	0.458616	2.14242	0.0321596	0.124043	PITX1	Not Significant
ENSG00000175197	34.2235	0.982301	0.516333	1.90246	0.0571115	0.178961	DDIT3	Not Significant
ENSG00000196363	483.302	0.981629	0.233485	4.20424	2.61958e-05	0.000882651	WDR5	Enriched
ENSG00000125656	277.786	0.981539	0.385588	2.54556	0.0109102	0.0613145	CLPP	Not Significant
ENSG00000027001	204.881	0.981112	0.259177	3.78548	0.000153411	0.00325813	MIPEP	Enriched
ENSG00000137106	326.016	0.981063	0.29032	3.37925	0.000726845	0.0100076	GRHPR	Enriched
ENSG00000077044	1863.88	0.980903	0.280762	3.49371	0.000476354	0.00751046	DGKD	Enriched
ENSG00000184227	10.4475	0.980597	0.659883	1.48602	0.137275	0.312523	ACOT1	Not Significant
ENSG00000068438	308.287	0.980588	0.427277	2.29497	0.0217348	0.0961901	FTSJ1	Not Significant
ENSG00000136270	642.067	0.980249	0.254587	3.85035	0.000117951	0.00273348	TBRG4	Enriched
ENSG00000171159	54.6404	0.980222	0.410748	2.38643	0.0170128	0.0825266	BBLN	Not Significant
ENSG00000159346	273.959	0.98022	0.423953	2.3121	0.0207724	0.0935038	ADIPOR1	Not Significant
ENSG00000139190	11.4985	0.980195	0.619239	1.5829	0.113444	0.276716	VAMP1	Not Significant
ENSG00000127184	462.059	0.979803	0.410686	2.38577	0.0170434	0.0826214	COX7C	Not Significant
ENSG00000095739	227.918	0.979139	0.279399	3.50444	0.000457565	0.00725518	BAMBI	Enriched
ENSG00000168209	608.795	0.979091	0.389059	2.51656	0.0118505	0.0647546	DDIT4	Not Significant
ENSG00000105676	295.743	0.978709	0.312701	3.12986	0.00174892	0.0181225	ARMC6	Enriched
ENSG00000180822	80.6944	0.978205	0.33886	2.88675	0.00389242	0.0312771	PSMG4	Enriched
ENSG00000086504	195.18	0.978085	0.385469	2.53739	0.0111682	0.0622743	MRPL28	Not Significant
ENSG00000187837	9465.69	0.977391	0.345776	2.82666	0.00470358	0.0354043	H1-2	Enriched
ENSG00000130311	173.867	0.976867	0.465624	2.09798	0.0359073	0.133796	DDA1	Not Significant
ENSG00000175182	9.26716	0.97625	0.627623	1.55547	0.119834	0.286432	FAM131A	Not Significant
ENSG00000103254	36.2084	0.97611	0.578267	1.68799	0.0914128	0.24124	ANTKMT	Not Significant
ENSG00000108561	1215.92	0.976064	0.338849	2.88053	0.00397012	0.0315665	C1QBP	Enriched
ENSG00000106305	140.537	0.975865	0.471195	2.07104	0.0383549	0.139687	AIMP2	Not Significant
ENSG00000100410	267.685	0.975629	0.529729	1.84175	0.0655116	0.195452	PHF5A	Not Significant
ENSG00000171130	61.9705	0.975403	0.439961	2.21702	0.0266217	0.109763	ATP6V0E2	Not Significant
ENSG00000105204	11.6213	0.9754	0.59461	1.6404	0.100922	0.255907	DYRK1B	Not Significant
ENSG00000183527	778.479	0.975398	0.380442	2.56385	0.0103517	0.059408	PSMG1	Not Significant
ENSG00000172354	437.574	0.975316	0.28227	3.45526	0.000549771	0.00826807	GNB2	Enriched
ENSG00000130414	943.521	0.975151	0.213694	4.5633	5.03552e-06	0.000246741	NDUFA10	Enriched
ENSG00000123416	1717.53	0.974963	0.444496	2.19341	0.0282777	0.114223	TUBA1B	Not Significant
ENSG00000169228	53.1553	0.974944	0.366745	2.65837	0.00785192	0.0495921	RAB24	Enriched
ENSG00000168256	289.158	0.974543	0.388321	2.50964	0.0120856	0.0655849	NKIRAS2	Not Significant
ENSG00000101473	22.94	0.97445	0.508854	1.91499	0.0554937	0.175728	ACOT8	Not Significant
ENSG00000148840	2784.29	0.974173	0.298667	3.26174	0.00110731	0.01324	PPRC1	Enriched
ENSG00000129460	358.964	0.974097	0.383118	2.54255	0.0110046	0.0616143	NGDN	Not Significant
ENSG00000142676	7464.6	0.97402	0.287864	3.38361	0.000715397	0.00991506	RPL11	Enriched
ENSG00000075399	32.7505	0.973473	0.492662	1.97595	0.0481609	0.160508	VPS9D1	Not Significant
ENSG00000004142	650.532	0.973082	0.29992	3.24447	0.0011767	0.0137732	POLDIP2	Enriched
ENSG00000143537	297.609	0.972669	0.424546	2.29108	0.0219589	0.0966213	ADAM15	Not Significant
ENSG00000099804	158.729	0.972599	0.363129	2.67838	0.00739786	0.0475251	CDC34	Enriched
ENSG00000141543	1174.51	0.971863	0.28604	3.39765	0.000679677	0.00959612	EIF4A3	Enriched
ENSG00000106635	243.3	0.971638	0.484841	2.00403	0.0450666	0.154311	BCL7B	Not Significant
ENSG00000224051	134.896	0.971505	0.488333	1.98943	0.0466538	0.157303	CPTP	Not Significant
ENSG00000107223	373.129	0.971456	0.396529	2.4499	0.0142896	0.0734495	EDF1	Not Significant
ENSG00000146540	166.845	0.971261	0.558799	1.73812	0.0821892	0.225787	C7orf50	Not Significant
ENSG00000068120	937.624	0.970859	0.213924	4.53833	5.67019e-06	0.000271625	COASY	Enriched
ENSG00000100997	107.964	0.970804	0.362342	2.67925	0.00737877	0.0474228	ABHD12	Enriched
ENSG00000148384	83.9724	0.970641	0.364075	2.66605	0.00767491	0.0486217	INPP5E	Enriched
ENSG00000163945	182.922	0.970362	0.330303	2.93779	0.00330559	0.0280498	UVSSA	Enriched
ENSG00000148335	45.4226	0.970282	0.422825	2.29476	0.0217469	0.0961987	NTMT1	Not Significant
ENSG00000172732	284.504	0.970105	0.438423	2.21271	0.0269175	0.110485	MUS81	Not Significant
ENSG00000108439	469.546	0.970009	0.386893	2.50718	0.01217	0.0657671	PNPO	Not Significant
ENSG00000234616	623.608	0.96989	0.398167	2.43589	0.0148554	0.075228	JRK	Not Significant
ENSG00000105063	3005.68	0.969859	0.250789	3.86724	0.000110076	0.00259978	PPP6R1	Enriched
ENSG00000134461	35.8543	0.969841	0.467505	2.0745	0.0380325	0.138817	ANKRD16	Not Significant
ENSG00000133398	243.886	0.96979	0.535089	1.81239	0.069926	0.203401	MED10	Not Significant
ENSG00000162227	52.7527	0.969665	0.37157	2.60965	0.00906362	0.0546222	TAF6L	Not Significant
ENSG00000160185	169.835	0.969656	0.272065	3.56406	0.000365168	0.00614514	UBASH3A	Enriched
ENSG00000141753	171.91	0.969521	0.297979	3.25365	0.00113931	0.0134616	IGFBP4	Enriched
ENSG00000168936	187.572	0.969481	0.302582	3.20403	0.00135518	0.0152435	TMEM129	Enriched
ENSG00000162144	64.4131	0.969437	0.44735	2.16707	0.0302298	0.119093	CYB561A3	Not Significant
ENSG00000177963	390.716	0.968256	0.29835	3.24537	0.00117296	0.0137402	RIC8A	Enriched
ENSG00000083457	40.889	0.968189	0.587248	1.64869	0.0992118	0.253248	ITGAE	Not Significant
ENSG00000233426	50.2922	0.968176	0.409251	2.36573	0.0179946	0.0858452	EIF3FP3	Not Significant
ENSG00000101000	193.524	0.967968	0.318757	3.0367	0.00239186	0.022427	PROCR	Enriched
ENSG00000168002	131.923	0.967284	0.405002	2.38834	0.0169246	0.0822587	POLR2G	Not Significant
ENSG00000125447	971.907	0.966742	0.225019	4.29627	1.73696e-05	0.000633674	GGA3	Enriched
ENSG00000204308	168.622	0.966692	0.351138	2.75303	0.00590469	0.0412366	RNF5	Enriched
ENSG00000105726	336.213	0.96649	0.28473	3.39441	0.000687756	0.00967374	ATP13A1	Enriched
ENSG00000168591	113.517	0.966453	0.329016	2.9374	0.00330973	0.0280691	TMUB2	Enriched
ENSG00000140497	376.537	0.966307	0.470822	2.05238	0.0401326	0.143547	SCAMP2	Not Significant
ENSG00000104976	96.2188	0.965978	0.347387	2.7807	0.00542423	0.0390468	SNAPC2	Enriched
ENSG00000110852	31.3879	0.965511	0.453218	2.13035	0.033143	0.126353	CLEC2B	Not Significant
ENSG00000141030	1467.37	0.96539	0.293224	3.29233	0.000993611	0.0123636	COPS3	Enriched
ENSG00000170266	549.047	0.965215	0.336316	2.86996	0.00410518	0.0322775	GLB1	Enriched
ENSG00000110011	36.6654	0.965125	0.563671	1.71221	0.0868573	0.233815	DNAJC4	Not Significant
ENSG00000128342	160.507	0.964975	0.361178	2.67174	0.00754582	0.0481443	LIF	Enriched
ENSG00000204160	353.66	0.964603	0.404762	2.38314	0.0171658	0.0831077	ZDHHC18	Not Significant
ENSG00000133265	209.542	0.964593	0.354373	2.72197	0.00648937	0.0437507	HSPBP1	Enriched
ENSG00000108106	639.314	0.963959	0.441618	2.18279	0.0290513	0.116066	UBE2S	Not Significant
ENSG00000184207	57.7643	0.963304	0.408962	2.35548	0.0184985	0.0871676	PGP	Not Significant
ENSG00000271856	82.884	0.962822	0.403098	2.38856	0.0169147	0.0822587	LINC01215	Not Significant
ENSG00000105755	23.1409	0.96275	0.529535	1.8181	0.0690484	0.202012	ETHE1	Not Significant
ENSG00000165501	69.1142	0.962088	0.55616	1.72988	0.0836524	0.228222	LRR1	Not Significant
ENSG00000184281	85.9902	0.961715	0.437957	2.19591	0.0280982	0.113743	TSSC4	Not Significant
ENSG00000090487	487.598	0.961477	0.438909	2.19061	0.0284802	0.114609	SPG21	Not Significant
ENSG00000054148	29.5816	0.961401	0.419598	2.29124	0.0219493	0.0966213	PHPT1	Not Significant
ENSG00000164885	40.4803	0.961375	0.473037	2.03235	0.0421187	0.147829	CDK5	Not Significant
ENSG00000204713	862.666	0.961352	0.254089	3.78353	0.000154619	0.00327452	TRIM27	Enriched
ENSG00000158604	322.898	0.961163	0.379994	2.52942	0.0114252	0.0632606	TMED4	Not Significant
ENSG00000111640	6481.42	0.960964	0.261977	3.66812	0.00024434	0.00455111	GAPDH	Enriched
ENSG00000168005	677.416	0.960622	0.444297	2.16212	0.0306093	0.120145	SPINDOC	Not Significant
ENSG00000116478	1498.56	0.960577	0.256028	3.75184	0.000175542	0.00359083	HDAC1	Enriched
ENSG00000177548	120.602	0.960277	0.295817	3.24619	0.0011696	0.0137312	RABEP2	Enriched
ENSG00000183207	1043.09	0.959831	0.230787	4.15894	3.19729e-05	0.00102205	RUVBL2	Enriched
ENSG00000162231	393.846	0.959753	0.259501	3.69845	0.000216919	0.00415388	NXF1	Enriched
ENSG00000135314	68.9422	0.95971	0.355312	2.70103	0.00691241	0.0455781	KHDC1	Enriched
ENSG00000232021	19.0845	0.959665	0.572489	1.6763	0.093679	0.245052	LEF1-AS1	Not Significant
ENSG00000162385	435.902	0.959279	0.343592	2.79192	0.00523971	0.0381936	MAGOH	Enriched
ENSG00000178952	1873.76	0.959135	0.222466	4.31138	1.62237e-05	0.000603124	TUFM	Enriched
ENSG00000140830	81.4995	0.959066	0.396991	2.41584	0.0156991	0.0780749	TXNL4B	Not Significant
ENSG00000183579	285.164	0.958772	0.319236	3.00334	0.00267037	0.024237	ZNRF3	Enriched
ENSG00000182307	1202.27	0.958375	0.328654	2.91606	0.00354477	0.0293821	C8orf33	Enriched
ENSG00000180901	802.21	0.958267	0.217044	4.41508	1.00973e-05	0.000413659	KCTD2	Enriched
ENSG00000091129	13.5429	0.958038	0.556376	1.72193	0.0850829	0.23086	NRCAM	Not Significant
ENSG00000171163	113.681	0.957799	0.385097	2.48716	0.0128767	0.0684899	ZNF692	Not Significant
ENSG00000281398	1146.3	0.957564	0.315884	3.03138	0.00243442	0.022722	SNHG4	Enriched
ENSG00000157911	56.3245	0.956702	0.401166	2.38481	0.0170882	0.0827882	PEX10	Not Significant
ENSG00000201998	27.8206	0.955723	0.737742	1.29547	0.195158	0.387883	SNORA23	Not Significant
ENSG00000174669	149.456	0.955626	0.432682	2.20861	0.0272018	0.111317	SLC29A2	Not Significant
ENSG00000060762	44.1955	0.954335	0.509184	1.87424	0.0608969	0.185946	MPC1	Not Significant
ENSG00000170892	75.9073	0.953919	0.501038	1.90389	0.0569251	0.178514	TSEN34	Not Significant
ENSG00000213862	50.1837	0.953226	0.398699	2.39084	0.0168098	0.0819396	RPL7AP62	Not Significant
ENSG00000158042	210.239	0.952854	0.43215	2.20492	0.02746	0.112067	MRPL17	Not Significant
ENSG00000183751	319.712	0.952705	0.281015	3.39023	0.000698331	0.00974933	TBL3	Enriched
ENSG00000102178	581.005	0.952673	0.328367	2.90125	0.00371683	0.0303541	UBL4A	Enriched
ENSG00000130733	80.3312	0.952456	0.441586	2.1569	0.0310134	0.121066	YIPF2	Not Significant
ENSG00000220205	68.4282	0.952157	0.358684	2.65458	0.00794069	0.0499424	VAMP2	Enriched
ENSG00000165637	793.767	0.95187	0.319251	2.98157	0.00286777	0.0254886	VDAC2	Enriched
ENSG00000126254	487.87	0.951667	0.292354	3.25519	0.00113317	0.0134205	RBM42	Enriched
ENSG00000257365	104.794	0.951392	0.36355	2.61695	0.00887187	0.0538755	FNTB	Not Significant
ENSG00000004660	70.1263	0.951338	0.366265	2.5974	0.0093932	0.0559625	CAMKK1	Not Significant
ENSG00000141756	563.89	0.950632	0.336671	2.82362	0.00474843	0.0356346	FKBP10	Enriched
ENSG00000290687	253.005	0.950164	0.3421	2.77745	0.00547877	0.0392868	ZNF286B	Enriched
ENSG00000135211	24.9846	0.949749	0.530758	1.78942	0.0735473	0.210332	TMEM60	Not Significant
ENSG00000165672	646.978	0.949102	0.490569	1.9347	0.0530274	0.170438	PRDX3	Not Significant
ENSG00000101311	1421.15	0.949041	0.298608	3.17822	0.00148182	0.0161471	FERMT1	Enriched
ENSG00000254901	26.1564	0.948822	0.558315	1.69944	0.0892368	0.237785	BORCS8	Not Significant
ENSG00000198841	71.3457	0.948616	0.455675	2.08178	0.0373623	0.137071	KTI12	Not Significant
ENSG00000149150	214.548	0.948218	0.278581	3.40374	0.000664703	0.0094291	SLC43A1	Enriched
ENSG00000143624	519.306	0.948177	0.248933	3.80896	0.00013955	0.00308095	INTS3	Enriched
ENSG00000099330	33.4836	0.947462	0.425061	2.229	0.0258138	0.107485	OCEL1	Not Significant
ENSG00000087589	164.526	0.9471	0.325287	2.91158	0.00359607	0.0296091	CASS4	Enriched
ENSG00000116212	257.754	0.946627	0.38944	2.43074	0.0150681	0.0759176	LRRC42	Not Significant
ENSG00000197283	447.999	0.946382	0.257976	3.66848	0.000243994	0.00455111	SYNGAP1	Enriched
ENSG00000100353	1631.67	0.945938	0.26075	3.62776	0.000285888	0.00513366	EIF3D	Enriched
ENSG00000181924	385.394	0.945937	0.491914	1.92297	0.0544837	0.173593	COA4	Not Significant
ENSG00000288821	12.1299	0.945878	0.593168	1.59462	0.110797	0.27221	LOC105371354	Not Significant
ENSG00000244038	2782.47	0.945781	0.346817	2.72703	0.00639076	0.0433393	DDOST	Enriched
ENSG00000130706	541.896	0.944456	0.45694	2.06691	0.0387422	0.140376	ADRM1	Not Significant
ENSG00000102871	20.5765	0.944184	0.549773	1.7174	0.0859052	0.232335	TRADD	Not Significant
ENSG00000204435	86.5893	0.943879	0.445369	2.11932	0.0340636	0.128641	CSNK2B	Not Significant
ENSG00000204172	17.9889	0.943843	0.48774	1.93514	0.0529736	0.170374	AGAP9	Not Significant
ENSG00000042753	165.535	0.943686	0.356045	2.65047	0.0080381	0.0503496	AP2S1	Not Significant
ENSG00000143258	219.622	0.94367	0.41322	2.2837	0.0223894	0.0978006	USP21	Not Significant
ENSG00000184924	50.858	0.943383	0.441385	2.13733	0.0325714	0.125096	PTRHD1	Not Significant
ENSG00000144559	124.063	0.943213	0.307153	3.07083	0.00213467	0.0207033	TAMM41	Enriched
ENSG00000136003	196.346	0.943202	0.54837	1.72001	0.0854306	0.23151	ISCU	Not Significant
ENSG00000115944	659.611	0.943066	0.409229	2.3045	0.0211948	0.0946945	COX7A2L	Not Significant
ENSG00000169683	74.1606	0.94306	0.315703	2.98717	0.00281572	0.0251603	LRRC45	Enriched
ENSG00000136718	762.223	0.942847	0.239348	3.93923	8.17438e-05	0.00209258	IMP4	Enriched
ENSG00000291044	13.4398	0.942266	0.652551	1.44397	0.148747	0.329148	BCRP2	Not Significant
ENSG00000136950	596.767	0.941708	0.343618	2.74056	0.00613338	0.0423406	ARPC5L	Enriched
ENSG00000183978	30.5425	0.941391	0.521974	1.80352	0.0713067	0.206125	COA3	Not Significant
ENSG00000176155	218.703	0.940874	0.286027	3.28946	0.00100381	0.0124184	CCDC57	Enriched
ENSG00000173812	2580.2	0.940719	0.519124	1.81213	0.0699665	0.203401	EIF1	Not Significant
ENSG00000080603	119.4	0.940321	0.326946	2.87608	0.00402649	0.0319043	SRCAP	Enriched
ENSG00000204576	241.37	0.939886	0.329706	2.85068	0.00436259	0.0335794	PRR3	Enriched
ENSG00000177082	56.0084	0.939648	0.388147	2.42085	0.0154841	0.077158	WDR73	Not Significant
ENSG00000090447	272.41	0.938532	0.382668	2.4526	0.0141828	0.0731089	TFAP4	Not Significant
ENSG00000100412	471.992	0.938296	0.253774	3.69737	0.000217844	0.00416336	ACO2	Enriched
ENSG00000008130	410.879	0.938285	0.387298	2.42264	0.0154081	0.0769326	NADK	Not Significant
ENSG00000102007	129.062	0.937798	0.466001	2.01244	0.0441738	0.152741	PLP2	Not Significant
ENSG00000237506	14.7851	0.936917	0.694794	1.34848	0.177504	0.367117	RPSAP15	Not Significant
ENSG00000132773	364.611	0.936846	0.357954	2.61722	0.00886487	0.0538573	TOE1	Not Significant
ENSG00000283122	22.5802	0.936559	0.538192	1.7402	0.0818246	0.22495	HYMAI	Not Significant
ENSG00000196262	2126.61	0.935894	0.385949	2.42491	0.0153121	0.0766575	PPIA	Not Significant
ENSG00000113269	658.866	0.935453	0.272293	3.43547	0.000591529	0.00871257	RNF130	Enriched
ENSG00000221978	595.583	0.935437	0.376732	2.48303	0.0130269	0.0690684	CCNL2	Not Significant
ENSG00000071462	252.279	0.935311	0.269197	3.47444	0.000511912	0.00790903	BUD23	Enriched
ENSG00000278189	396.661	0.934576	1.60158	0.583533	NA	NA	RNA5-8SN1	Not Significant
ENSG00000278259	2061.9	0.93446	0.227119	4.11441	3.88175e-05	0.00116873	MYO19	Enriched
ENSG00000100413	111.289	0.934442	0.427377	2.18646	0.028782	0.115418	POLR3H	Not Significant
ENSG00000102981	16.9166	0.934391	0.777627	1.20159	0.229522	0.429034	PARD6A	Not Significant
ENSG00000156858	177.457	0.934135	0.369594	2.52746	0.011489	0.0634964	PRR14	Not Significant
ENSG00000166261	716.02	0.933823	0.251602	3.71151	0.000206025	0.00399113	ZNF202	Enriched
ENSG00000125652	31.3586	0.933719	0.542633	1.72072	0.0853017	0.231244	ALKBH7	Not Significant
ENSG00000136699	823.262	0.933565	0.229297	4.07143	4.67263e-05	0.00135254	SMPD4	Enriched
ENSG00000115128	364.292	0.932326	0.520424	1.79148	0.073217	0.209787	SF3B6	Not Significant
ENSG00000100029	1540.03	0.931979	0.250972	3.71348	0.000204426	0.00398073	PES1	Enriched
ENSG00000105341	288.029	0.93091	0.390027	2.38679	0.0169963	0.0824735	DMAC2	Not Significant
ENSG00000118680	267.801	0.930674	0.402176	2.3141	0.0206625	0.0933172	MYL12B	Not Significant
ENSG00000159433	284.668	0.929864	0.565313	1.64487	0.0999972	0.254424	STARD9	Not Significant
ENSG00000030110	80.5466	0.929792	0.480538	1.9349	0.0530026	0.170395	BAK1	Not Significant
ENSG00000185122	692.497	0.929467	0.297746	3.12168	0.00179822	0.0185055	HSF1	Enriched
ENSG00000115234	712.778	0.928879	0.376842	2.4649	0.0137051	0.0715761	SNX17	Not Significant
ENSG00000073060	750.303	0.928623	0.32977	2.81597	0.00486305	0.0362769	SCARB1	Enriched
ENSG00000168397	295.909	0.928463	0.344026	2.69881	0.00695872	0.0457828	ATG4B	Enriched
ENSG00000141741	88.5004	0.927585	0.593656	1.5625	0.118171	0.284088	MIEN1	Not Significant
ENSG00000142207	14940.8	0.927534	0.357641	2.59348	0.00950111	0.0563786	URB1	Not Significant
ENSG00000197448	238.046	0.927442	0.248884	3.7264	0.000194236	0.00385234	GSTK1	Enriched
ENSG00000101439	44.5198	0.927245	0.522194	1.77567	0.0757872	0.214204	CST3	Not Significant
ENSG00000162779	18.0455	0.92712	0.510516	1.81604	0.0693638	0.202539	AXDND1	Not Significant
ENSG00000196636	32.4511	0.926931	0.674774	1.37369	0.169537	0.357279	SDHAF3	Not Significant
ENSG00000160446	60.3519	0.926671	0.623851	1.48541	0.137436	0.312704	ZDHHC12	Not Significant
ENSG00000006062	41.6729	0.926425	0.375226	2.46898	0.01355	0.0709882	MAP3K14	Not Significant
ENSG00000283199	21.8933	0.926391	0.549802	1.68495	0.0919974	0.242257	C13orf46	Not Significant
ENSG00000204934	38.1193	0.926085	0.432572	2.14088	0.0322834	0.124314	ATP6V0E2-AS1	Not Significant
ENSG00000170310	52.4476	0.925959	0.375889	2.46338	0.0137633	0.0718049	STX8	Not Significant
ENSG00000065600	355.692	0.925792	0.293225	3.15727	0.00159251	0.0169841	PACC1	Enriched
ENSG00000115694	375.286	0.925369	0.353051	2.62107	0.00876548	0.0534484	STK25	Not Significant
ENSG00000167525	34.205	0.924943	0.443963	2.08338	0.0372168	0.136781	PROCA1	Not Significant
ENSG00000198960	25.4065	0.924873	0.601728	1.53703	0.124286	0.292965	ARMCX6	Not Significant
ENSG00000106153	1870.12	0.924358	0.53015	1.74358	0.0812325	0.223979	CHCHD2	Not Significant
ENSG00000242802	135.2	0.924036	0.318316	2.90289	0.00369738	0.0302447	AP5Z1	Enriched
ENSG00000125148	93.5308	0.923945	0.516692	1.7882	0.0737445	0.210855	MT2A	Not Significant
ENSG00000005194	336.009	0.9237	0.391741	2.35794	0.0183768	0.0867577	CIAPIN1	Not Significant
ENSG00000237774	17.032	0.922654	0.488729	1.88786	0.0590444	0.182719	RPL14P4	Not Significant
ENSG00000101412	344.595	0.922354	0.367316	2.51107	0.0120367	0.0654473	E2F1	Not Significant
ENSG00000106006	16.2225	0.921997	0.626084	1.47264	0.140848	0.317814	HOXA6	Not Significant
ENSG00000027847	81.6599	0.921724	0.510372	1.80598	0.0709208	0.20533	B4GALT7	Not Significant
ENSG00000187796	17.3824	0.92138	0.683284	1.34846	0.177511	0.367117	CARD9	Not Significant
ENSG00000168096	95.8507	0.920459	0.297621	3.09272	0.0019833	0.0197461	ANKS3	Enriched
ENSG00000178927	165.108	0.920144	0.409639	2.24623	0.0246894	0.104622	CYBC1	Not Significant
ENSG00000160563	88.1318	0.920035	0.46059	1.99751	0.0457693	0.155369	MED27	Not Significant
ENSG00000115317	200.315	0.919508	0.386083	2.38164	0.0172359	0.0833662	HTRA2	Not Significant
ENSG00000146232	78.5894	0.919415	0.322947	2.84695	0.00441404	0.0338884	NFKBIE	Enriched
ENSG00000206585	354.836	0.918944	0.661309	1.38958	0.164656	0.350733	RNVU1-7	Not Significant
ENSG00000135046	602.418	0.918769	0.271421	3.38504	0.000711684	0.00989888	ANXA1	Enriched
ENSG00000169696	141.904	0.918416	0.397275	2.31179	0.0207893	0.0935156	ASPSCR1	Not Significant
ENSG00000165792	245.544	0.918354	0.290679	3.15934	0.00158127	0.0169243	METTL17	Enriched
ENSG00000100448	15.0296	0.918177	0.787573	1.16583	0.243683	0.445474	CTSG	Not Significant
ENSG00000213923	151.311	0.918134	0.388524	2.36314	0.018121	0.0861173	CSNK1E	Not Significant
ENSG00000159899	20.13	0.918021	0.530996	1.72887	0.0838328	0.228502	NPR2	Not Significant
ENSG00000160087	429.745	0.917902	0.386457	2.37517	0.0175409	0.0842975	UBE2J2	Not Significant
ENSG00000213563	88.5624	0.917221	0.428588	2.1401	0.0323466	0.124424	C8orf82	Not Significant
ENSG00000175711	52.7745	0.917045	0.373295	2.45663	0.0140248	0.0726887	B3GNTL1	Not Significant
ENSG00000196756	572.958	0.916632	0.454512	2.01674	0.0437228	0.151732	SNHG17	Not Significant
ENSG00000185896	810.072	0.916282	0.292717	3.13027	0.00174646	0.0181207	LAMP1	Enriched
ENSG00000160213	765.542	0.915836	0.693838	1.31996	0.186849	0.378137	CSTB	Not Significant
ENSG00000169221	391.783	0.914948	0.433544	2.11039	0.0348248	0.130835	TBC1D10B	Not Significant
ENSG00000172164	393.907	0.914841	0.278951	3.27958	0.00103962	0.012725	SNTB1	Enriched
ENSG00000277149	12.6319	0.914032	0.6191	1.47639	0.13984	0.316444	TYW1B	Not Significant
ENSG00000114395	25.2506	0.913965	0.601938	1.51837	0.128921	0.300069	CYB561D2	Not Significant
ENSG00000115568	1020	0.913956	0.236656	3.86196	0.000112479	0.00263825	ZNF142	Enriched
ENSG00000010404	27.756	0.913709	0.471578	1.93756	0.0526772	0.169822	IDS	Not Significant
ENSG00000124571	3497.13	0.913378	0.311074	2.93621	0.00332253	0.0281285	XPO5	Enriched
ENSG00000141971	26.7602	0.913204	0.558842	1.6341	0.102238	0.25776	MVB12A	Not Significant
ENSG00000126088	1943.09	0.913148	0.313495	2.9128	0.00358207	0.0295757	UROD	Enriched
ENSG00000183597	60.0407	0.91193	0.43445	2.09904	0.0358129	0.133544	TANGO2	Not Significant
ENSG00000104679	163.292	0.911885	0.451814	2.01828	0.0435625	0.15142	R3HCC1	Not Significant
ENSG00000184983	226.618	0.911557	0.417031	2.18582	0.0288285	0.115454	NDUFA6	Not Significant
ENSG00000143314	376.356	0.910892	0.305461	2.98202	0.00286351	0.025481	MRPL24	Enriched
ENSG00000198171	183.481	0.909814	0.27274	3.33582	0.000850468	0.0110406	DDRGK1	Enriched
ENSG00000169241	172.285	0.909576	0.356316	2.55272	0.0106885	0.0604995	SLC50A1	Not Significant
ENSG00000166794	386.014	0.909115	0.392147	2.3183	0.020433	0.0926762	PPIB	Not Significant
ENSG00000167925	275.485	0.909079	0.344938	2.63548	0.00840175	0.0519274	GHDC	Not Significant
ENSG00000149273	17736.6	0.908805	0.556185	1.634	0.102259	0.25776	RPS3	Not Significant
ENSG00000126603	25.1507	0.908628	0.531321	1.71013	0.0872418	0.234469	GLIS2	Not Significant
ENSG00000178999	245.445	0.908303	0.385466	2.35638	0.0184542	0.0869984	AURKB	Not Significant
ENSG00000108784	42.4203	0.908208	0.459528	1.97639	0.0481104	0.160375	NAGLU	Not Significant
ENSG00000105373	1578.85	0.908199	0.280344	3.23959	0.00119701	0.0139357	NOP53	Enriched
ENSG00000105171	227.83	0.908174	0.482271	1.88312	0.0596839	0.18372	POP4	Not Significant
ENSG00000105281	1365.3	0.908164	0.380459	2.38702	0.0169854	0.0824471	SLC1A5	Not Significant
ENSG00000008838	319.831	0.908036	0.304966	2.9775	0.00290613	0.0257077	MED24	Enriched
ENSG00000019485	429.862	0.907634	0.267037	3.39891	0.000676555	0.00957006	PRDM11	Enriched
ENSG00000164077	98.7333	0.907534	0.422197	2.14955	0.0315907	0.122427	MON1A	Not Significant
ENSG00000179115	967.409	0.907339	0.269124	3.37145	0.000747724	0.0102014	FARSA	Enriched
ENSG00000161981	169.065	0.907081	0.577948	1.56949	0.116535	0.281871	SNRNP25	Not Significant
ENSG00000129559	179.786	0.907067	0.355452	2.55187	0.0107148	0.0605568	NEDD8	Not Significant
ENSG00000174137	15.5796	0.906719	0.497831	1.82134	0.0685551	0.200882	FAM53A	Not Significant
ENSG00000167863	230.771	0.906247	0.391826	2.31288	0.0207291	0.0934336	ATP5PD	Not Significant
ENSG00000198952	1438.94	0.905796	0.252006	3.59434	0.00032521	0.00559198	SMG5	Enriched
ENSG00000111321	534.165	0.905262	0.360865	2.50859	0.0121216	0.0656123	LTBR	Not Significant
ENSG00000142186	641.052	0.905111	0.225571	4.01254	6.00684e-05	0.00162869	SCYL1	Enriched
ENSG00000170500	408.476	0.904431	0.438688	2.06167	0.0392388	0.14137	LONRF2	Not Significant
ENSG00000171314	847.139	0.903722	0.299344	3.01901	0.00253599	0.0233428	PGAM1	Enriched
ENSG00000161179	167.576	0.903675	0.394177	2.29256	0.0218733	0.0964897	YDJC	Not Significant
ENSG00000110801	29.2529	0.903393	0.618533	1.46054	0.144141	0.322864	PSMD9	Not Significant
ENSG00000241506	21.651	0.903167	0.463157	1.95003	0.0511731	0.166556	PSMC1P1	Not Significant
ENSG00000113734	39.2884	0.903002	0.465622	1.93934	0.0524594	0.169381	BNIP1	Not Significant
ENSG00000204568	630.454	0.902544	0.287865	3.1353	0.00171677	0.0179007	MRPS18B	Enriched
ENSG00000164815	128.72	0.902191	0.473058	1.90715	0.0565013	0.177792	ORC5	Not Significant
ENSG00000126456	387.003	0.902105	0.258107	3.49508	0.000473918	0.00747993	IRF3	Enriched
ENSG00000204264	708.166	0.901942	0.269999	3.34054	0.000836168	0.0109091	PSMB8	Enriched
ENSG00000163382	285.068	0.901917	0.448336	2.0117	0.0442516	0.152741	NAXE	Not Significant
ENSG00000175581	201.673	0.901513	0.359309	2.50902	0.0121068	0.0656049	MRPL48	Not Significant
ENSG00000084092	321.619	0.901091	0.250649	3.59503	0.000324359	0.00558374	NOA1	Enriched
ENSG00000291117	17.8313	0.900891	0.508566	1.77143	0.0764885	0.215415	PLEKHM1P1	Not Significant
ENSG00000167771	96.334	0.900764	0.352737	2.55364	0.0106602	0.0604306	RCOR2	Not Significant
ENSG00000111361	580.569	0.900752	0.301525	2.98732	0.00281435	0.0251603	EIF2B1	Enriched
ENSG00000140263	827.098	0.900711	0.250044	3.6022	0.000315533	0.00548215	SORD	Enriched
ENSG00000164733	1319.61	0.900595	0.273982	3.28705	0.00101242	0.0124719	CTSB	Enriched
ENSG00000170178	11.0056	0.900238	0.647211	1.39095	0.164241	0.350153	HOXD12	Not Significant
ENSG00000169738	205.093	0.900032	0.479733	1.87611	0.0606401	0.185407	DCXR	Not Significant
ENSG00000128463	143.763	0.899774	0.490959	1.83269	0.066849	0.19786	EMC4	Not Significant
ENSG00000148297	257.681	0.899492	0.301082	2.98753	0.00281238	0.0251603	MED22	Enriched
ENSG00000117877	87.9641	0.899467	0.370409	2.42831	0.0151696	0.0762495	POLR1G	Not Significant
ENSG00000177697	186.842	0.899454	0.405085	2.22041	0.026391	0.10907	CD151	Not Significant
ENSG00000204305	51.1417	0.899413	0.376311	2.39008	0.0168447	0.0820828	AGER	Not Significant
ENSG00000005100	2103.29	0.899399	0.231196	3.8902	0.00010016	0.00243074	DHX33	Enriched
ENSG00000163933	308.831	0.899257	0.3281	2.7408	0.00612897	0.0423297	RFT1	Enriched
ENSG00000100084	209.975	0.898722	0.257328	3.49252	0.000478484	0.00752822	HIRA	Enriched
ENSG00000163956	404.409	0.898533	0.284142	3.16227	0.00156545	0.0168019	LRPAP1	Enriched
ENSG00000184675	640.969	0.898242	0.276748	3.2457	0.00117162	0.0137352	AMER1	Enriched
ENSG00000109919	705.198	0.89814	0.389247	2.30738	0.0210337	0.0941431	MTCH2	Not Significant
ENSG00000155465	13.5523	0.897987	0.681079	1.31848	0.187344	0.378627	SLC7A7	Not Significant
ENSG00000143851	1453.32	0.897493	0.333243	2.69321	0.0070767	0.0462846	PTPN7	Enriched
ENSG00000064490	53.3993	0.89748	0.457486	1.96176	0.0497899	0.163789	RFXANK	Not Significant
ENSG00000101152	843.237	0.897205	0.242792	3.69536	0.000219572	0.00418243	DNAJC5	Enriched
ENSG00000165526	2836.61	0.897203	0.287518	3.12051	0.00180536	0.0185535	RPUSD4	Enriched
ENSG00000117362	442.458	0.896837	0.541942	1.65486	0.0979532	0.251405	APH1A	Not Significant
ENSG00000141698	280.148	0.896608	0.346904	2.5846	0.00974933	0.0572587	NT5C3B	Not Significant
ENSG00000177570	315.024	0.896475	0.504339	1.77752	0.0754823	0.213642	SAMD12	Not Significant
ENSG00000162734	302.94	0.896458	0.336779	2.66186	0.00777111	0.0491438	PEA15	Enriched
ENSG00000105254	331.219	0.896398	0.438033	2.04642	0.0407154	0.144768	TBCB	Not Significant
ENSG00000143319	1758.93	0.895792	0.328237	2.7291	0.00635072	0.0431653	ISG20L2	Enriched
ENSG00000160226	38.0122	0.89568	0.517176	1.73187	0.0832975	0.227761	CFAP410	Not Significant
ENSG00000166140	162.238	0.895599	0.269505	3.32313	0.000890144	0.0113961	ZFYVE19	Enriched
ENSG00000185608	67.9373	0.895473	0.567552	1.57778	0.114616	0.27885	MRPL40	Not Significant
ENSG00000256269	443.097	0.895259	0.33105	2.7043	0.00684484	0.045232	HMBS	Enriched
ENSG00000198937	38.0948	0.895239	0.443574	2.01824	0.0435659	0.15142	CCDC167	Not Significant
ENSG00000132002	659.371	0.894944	0.421012	2.1257	0.0335283	0.127336	DNAJB1	Not Significant
ENSG00000170043	70.4958	0.894747	0.435308	2.05543	0.0398371	0.142865	TRAPPC1	Not Significant
ENSG00000160075	1144.65	0.894646	0.382902	2.33649	0.0194657	0.0896508	SSU72	Not Significant
ENSG00000130382	1571.41	0.894437	0.23079	3.87554	0.000106388	0.00254414	MLLT1	Enriched
ENSG00000277258	116.734	0.89441	0.468538	1.90894	0.0562701	0.177325	PCGF2	Not Significant
ENSG00000166133	455.532	0.894104	0.257295	3.47502	0.000510815	0.00790419	RPUSD2	Enriched
ENSG00000167283	462.259	0.893484	0.483526	1.84785	0.0646239	0.193639	ATP5MG	Not Significant
ENSG00000077152	199.106	0.893294	0.45397	1.96774	0.0490984	0.16227	UBE2T	Not Significant
ENSG00000197070	56.3414	0.893262	0.380712	2.3463	0.018961	0.0881826	ARRDC1	Not Significant
ENSG00000124688	241.475	0.893229	0.428286	2.08559	0.0370159	0.136404	MAD2L1BP	Not Significant
ENSG00000075702	290.918	0.892864	0.317679	2.81058	0.00494521	0.036689	WDR62	Enriched
ENSG00000178607	712.564	0.892693	0.301163	2.96415	0.00303516	0.0262993	ERN1	Enriched
ENSG00000125454	111.353	0.892465	0.452646	1.97166	0.0486482	0.16145	SLC25A19	Not Significant
ENSG00000079974	28.2596	0.892214	0.611265	1.45962	0.144395	0.323191	RABL2B	Not Significant
ENSG00000205903	437.918	0.892163	0.338439	2.63611	0.00838619	0.0518627	ZNF316	Not Significant
ENSG00000163597	1800.76	0.89216	0.32003	2.78774	0.00530779	0.0384908	SNHG16	Enriched
ENSG00000162585	199.091	0.89213	0.547446	1.62962	0.103182	0.259578	FAAP20	Not Significant
ENSG00000052749	1528.95	0.891727	0.386675	2.30614	0.0211029	0.0943712	RRP12	Not Significant
ENSG00000105135	536.381	0.891625	0.300116	2.97093	0.00296898	0.0260432	ILVBL	Enriched
ENSG00000109103	147.312	0.891595	0.48629	1.83346	0.0667336	0.197826	UNC119	Not Significant
ENSG00000181938	125.036	0.890978	0.488039	1.82563	0.0679065	0.199802	GINS3	Not Significant
ENSG00000164615	347.965	0.890414	0.308714	2.88427	0.00392319	0.0313726	CAMLG	Enriched
ENSG00000160785	254.313	0.89033	0.319262	2.78871	0.00529177	0.0384145	SLC25A44	Enriched
ENSG00000026036	18.3757	0.889837	0.674019	1.3202	0.18677	0.378068	RTEL1-TNFRSF6B	Not Significant
ENSG00000107021	146.661	0.889808	0.495398	1.79615	0.0724712	0.208376	TBC1D13	Not Significant
ENSG00000101474	639.362	0.889801	0.308321	2.88596	0.0039022	0.0313094	APMAP	Enriched
ENSG00000165886	16.4272	0.889738	0.667194	1.33355	0.182351	0.372722	UBTD1	Not Significant
ENSG00000168883	848.808	0.889662	0.287953	3.08961	0.00200419	0.0199012	USP39	Enriched
ENSG00000132254	156.303	0.88958	0.365819	2.43175	0.0150262	0.0758338	ARFIP2	Not Significant
ENSG00000112578	472.601	0.889332	0.235717	3.77288	0.000161377	0.00339843	BYSL	Enriched
ENSG00000103145	21.1564	0.889056	0.712809	1.24726	0.212303	0.409521	HCFC1R1	Not Significant
ENSG00000012061	155.336	0.888925	0.373523	2.37984	0.0173202	0.083666	ERCC1	Not Significant
ENSG00000167394	53.4986	0.888705	0.342896	2.59176	0.00954855	0.0565893	ZNF668	Not Significant
ENSG00000121089	12.5834	0.888631	0.563098	1.57811	0.11454	0.278756	NACA3P	Not Significant
ENSG00000254093	81.1938	0.888561	0.305731	2.90635	0.00365674	0.0299941	PINX1	Enriched
ENSG00000159377	898.616	0.888509	0.410495	2.16448	0.0304274	0.119651	PSMB4	Not Significant
ENSG00000129968	94.039	0.888334	0.494021	1.79817	0.07215	0.207802	ABHD17A	Not Significant
ENSG00000167657	87.0803	0.887824	0.317886	2.7929	0.00522382	0.0380984	DAPK3	Enriched
ENSG00000114779	256.093	0.887515	0.251894	3.52337	0.000426101	0.00688466	ABHD14B	Enriched
ENSG00000064545	87.9049	0.887122	0.43473	2.04063	0.0412881	0.146111	TMEM161A	Not Significant
ENSG00000247092	57.3874	0.886531	0.653864	1.35583	0.175152	0.364285	SNHG10	Not Significant
ENSG00000137409	930.36	0.886377	0.356275	2.4879	0.0128499	0.06842	MTCH1	Not Significant
ENSG00000101132	42.1658	0.885705	0.564606	1.56871	0.116715	0.282171	PFDN4	Not Significant
ENSG00000163701	17.2597	0.885568	0.680571	1.30121	0.193185	0.385701	IL17RE	Not Significant
ENSG00000198885	865.268	0.885397	0.261744	3.38268	0.000717812	0.00993802	ITPRIPL1	Enriched
ENSG00000154889	27.6994	0.885193	0.461774	1.91694	0.0552454	0.175275	MPPE1	Not Significant
ENSG00000249695	53.5191	0.885099	0.346133	2.55711	0.0105546	0.060082	LOC574538	Not Significant
ENSG00000105447	913.625	0.884419	0.342076	2.58544	0.00972542	0.057198	GRWD1	Not Significant
ENSG00000006015	58.997	0.883762	0.528969	1.67073	0.094776	0.246729	REX1BD	Not Significant
ENSG00000166441	4420.26	0.883689	0.428752	2.06107	0.0392961	0.14147	RPL27A	Not Significant
ENSG00000092010	481.647	0.88368	0.350233	2.52312	0.0116318	0.063979	PSME1	Not Significant
ENSG00000250571	52.1748	0.883525	0.355584	2.48471	0.0129655	0.0688561	GLI4	Not Significant
ENSG00000114735	167.925	0.88326	0.286949	3.0781	0.00208322	0.0203756	HEMK1	Enriched
ENSG00000078808	1100.3	0.883135	0.307581	2.87122	0.00408887	0.0322307	SDF4	Enriched
ENSG00000095906	109.724	0.88278	0.516577	1.7089	0.0874689	0.234738	NUBP2	Not Significant
ENSG00000121073	157.917	0.882669	0.55161	1.60017	0.109561	0.270147	SLC35B1	Not Significant
ENSG00000116857	419.302	0.882324	0.409817	2.15297	0.0313211	0.12176	TMEM9	Not Significant
ENSG00000141570	84.9014	0.88231	0.322611	2.73491	0.00623979	0.0427342	CBX8	Enriched
ENSG00000236756	39.2662	0.881967	0.427144	2.0648	0.0389419	0.140833	DNAJC9-AS1	Not Significant
ENSG00000138085	127.012	0.881947	0.418901	2.10538	0.0352581	0.131868	ATRAID	Not Significant
ENSG00000126768	89.8619	0.881894	0.449645	1.96131	0.0498427	0.163927	TIMM17B	Not Significant
ENSG00000129925	212.976	0.881853	0.409773	2.15205	0.0313933	0.121946	PGAP6	Not Significant
ENSG00000167985	18.3231	0.881769	0.82006	1.07525	0.282263	0.486354	SDHAF2	Not Significant
ENSG00000139579	306.555	0.881391	0.494315	1.78306	0.0745771	0.212412	NABP2	Not Significant
ENSG00000172531	587.625	0.880984	0.440538	1.99979	0.0455227	0.154988	PPP1CA	Not Significant
ENSG00000185359	745.467	0.880422	0.255501	3.44586	0.000569243	0.00841738	HGS	Enriched
ENSG00000083807	63.669	0.880348	0.397566	2.21435	0.0268049	0.110227	SLC27A5	Not Significant
ENSG00000134590	46.9517	0.879656	0.464997	1.89175	0.0585248	0.181945	RTL8C	Not Significant
ENSG00000145741	1493.27	0.87949	0.450456	1.95245	0.0508854	0.165972	BTF3	Not Significant
ENSG00000095319	3617.4	0.879004	0.385258	2.2816	0.0225131	0.0981567	NUP188	Not Significant
ENSG00000166823	8.77194	0.878508	0.743646	1.18135	0.237463	NA	MESP1	Not Significant
ENSG00000103152	44.5348	0.877888	0.496532	1.76804	0.0770541	0.216398	MPG	Not Significant
ENSG00000173039	483.442	0.877374	0.279202	3.14244	0.00167549	0.0175926	RELA	Enriched
ENSG00000182318	82.7877	0.876878	0.294995	2.97252	0.00295371	0.0259667	ZSCAN22	Enriched
ENSG00000162302	237.118	0.876736	0.406829	2.15505	0.0311579	0.121409	RPS6KA4	Not Significant
ENSG00000117748	987.22	0.876492	0.299407	2.92743	0.00341778	0.0286772	RPA2	Enriched
ENSG00000166136	86.342	0.875948	0.469525	1.8656	0.0620967	0.188059	NDUFB8	Not Significant
ENSG00000163159	514.19	0.875561	0.450591	1.94314	0.0519994	0.168361	VPS72	Not Significant
ENSG00000007264	155.551	0.875402	0.393218	2.22625	0.0259971	0.108038	MATK	Not Significant
ENSG00000153406	188.434	0.87516	0.365726	2.39294	0.016714	0.081734	NMRAL1	Not Significant
ENSG00000182199	1750.54	0.875148	0.24741	3.53724	0.000404338	0.00662585	SHMT2	Enriched
ENSG00000173511	209.08	0.875037	0.357956	2.44454	0.0145038	0.0740199	VEGFB	Not Significant
ENSG00000084072	626.954	0.874654	0.239354	3.65423	0.000257952	0.00474569	PPIE	Enriched
ENSG00000125835	674.604	0.874555	0.373597	2.3409	0.0192373	0.0889939	SNRPB	Not Significant
ENSG00000186166	125.883	0.874532	0.362978	2.40933	0.0159819	0.0790886	CENATAC	Not Significant
ENSG00000070404	27.7198	0.874178	0.461002	1.89626	0.057926	0.180683	FSTL3	Not Significant
ENSG00000107175	35.7874	0.87409	0.388847	2.2479	0.0245827	0.104328	CREB3	Not Significant
ENSG00000266019	15.1397	0.873876	0.818355	1.06784	0.285591	0.490285	MIR3609	Not Significant
ENSG00000281106	17.0356	0.873605	0.524301	1.66623	0.095668	0.248202	TMEM272	Not Significant
ENSG00000131067	65.6194	0.873026	0.425509	2.05172	0.0401966	0.143707	GGT7	Not Significant
ENSG00000215012	420.327	0.872812	0.288329	3.02714	0.00246878	0.0229491	RTL10	Enriched
ENSG00000131165	254.094	0.872691	0.325538	2.68077	0.0073454	0.0473156	CHMP1A	Enriched
ENSG00000198746	238.511	0.872684	0.240991	3.62123	0.000293211	0.005209	GPATCH3	Enriched
ENSG00000131462	270.924	0.872503	0.346685	2.5167	0.011846	0.0647533	TUBG1	Not Significant
ENSG00000164125	729.663	0.872445	0.363183	2.40222	0.016296	0.0801122	GASK1B	Not Significant
ENSG00000167619	25.0338	0.872399	0.610663	1.42861	0.153116	0.335286	TMEM145	Not Significant
ENSG00000184470	85.373	0.872023	0.307033	2.84016	0.00450907	0.0344242	TXNRD2	Enriched
ENSG00000277654	68.6104	0.871958	0.341965	2.54985	0.010777	0.060748	LOC440311	Not Significant
ENSG00000125449	123.358	0.871806	0.418689	2.08223	0.0373219	0.137024	ARMC7	Not Significant
ENSG00000165629	714.063	0.871774	0.367241	2.37385	0.0176038	0.0845725	ATP5F1C	Not Significant
ENSG00000198189	410.59	0.871681	0.279128	3.12287	0.00179097	0.0184689	HSD17B11	Enriched
ENSG00000175426	208.782	0.871137	0.319694	2.72491	0.00643199	0.0435308	PCSK1	Enriched
ENSG00000224870	456.652	0.871074	0.260665	3.34173	0.000832574	0.0108837	MRPL20-AS1	Enriched
ENSG00000181638	56.2652	0.87081	0.341379	2.55086	0.0107458	0.0606178	ZFP41	Not Significant
ENSG00000239789	19.7884	0.870646	0.577264	1.50823	0.131496	0.303752	MRPS17	Not Significant
ENSG00000087237	17.3862	0.870588	0.515183	1.68986	0.0910542	0.240827	CETP	Not Significant
ENSG00000141965	57.2365	0.870585	0.428225	2.03301	0.0420514	0.147628	FEM1A	Not Significant
ENSG00000125691	5917.9	0.870325	0.419235	2.07598	0.0378954	0.138485	RPL23	Not Significant
ENSG00000105185	362.567	0.870245	0.441525	1.971	0.0487243	0.161542	PDCD5	Not Significant
ENSG00000112787	1401.56	0.869484	0.351174	2.47594	0.0132887	0.0699127	FBRSL1	Not Significant
ENSG00000010322	589.842	0.869435	0.243772	3.56659	0.00036165	0.00610651	NISCH	Enriched
ENSG00000010256	1286.56	0.868411	0.231114	3.75751	0.000171615	0.0035346	UQCRC1	Enriched
ENSG00000214485	136.298	0.868154	0.455068	1.90775	0.0564241	0.177736	RPL7P1	Not Significant
ENSG00000108518	2595.75	0.867982	0.408815	2.12317	0.0337398	0.127816	PFN1	Not Significant
ENSG00000134153	405.664	0.867674	0.526492	1.64803	0.0993468	0.253464	EMC7	Not Significant
ENSG00000275023	1081.4	0.867376	0.240914	3.60036	0.000317782	0.0055021	MLLT6	Enriched
ENSG00000149100	1717.01	0.867296	0.318473	2.7233	0.0064634	0.043689	EIF3M	Enriched
ENSG00000213995	202.499	0.867211	0.323802	2.67821	0.00740157	0.0475286	NAXD	Enriched
ENSG00000103202	305.281	0.867186	0.397465	2.18179	0.0291249	0.116251	NME4	Not Significant
ENSG00000198517	133.942	0.867116	0.299945	2.89092	0.00384114	0.0310146	MAFK	Enriched
ENSG00000171612	256.731	0.867058	0.504415	1.71894	0.0856257	0.23183	SLC25A33	Not Significant
ENSG00000135372	3284.65	0.866966	0.434722	1.9943	0.0461193	0.156274	NAT10	Not Significant
ENSG00000107020	112.637	0.866629	0.486554	1.78116	0.0748867	0.21276	PLGRKT	Not Significant
ENSG00000162065	228.489	0.866068	0.2384	3.63284	0.000280322	0.00506403	TBC1D24	Enriched
ENSG00000161395	42.534	0.86577	0.409681	2.11328	0.0345769	0.130067	PGAP3	Not Significant
ENSG00000100083	256.203	0.864612	0.282017	3.06582	0.00217076	0.020851	GGA1	Enriched
ENSG00000125734	93.2156	0.864355	0.38347	2.25404	0.0241938	0.103271	GPR108	Not Significant
ENSG00000185201	351.59	0.864306	0.362884	2.38177	0.0172296	0.0833624	IFITM2	Not Significant
ENSG00000076650	214.048	0.864305	0.396449	2.18012	0.0292486	0.116544	GPATCH1	Not Significant
ENSG00000119673	84.6376	0.864067	0.297726	2.90223	0.00370518	0.0302772	ACOT2	Enriched
ENSG00000100938	164.014	0.863985	0.259549	3.3288	0.000872218	0.0112451	GMPR2	Enriched
ENSG00000091947	107.865	0.863638	0.31855	2.71115	0.00670494	0.0446817	TMEM101	Enriched
ENSG00000121775	134.168	0.863555	0.336613	2.56543	0.0103049	0.0592682	TMEM39B	Not Significant
ENSG00000040633	411.453	0.863454	0.379474	2.2754	0.0228821	0.0990896	PHF23	Not Significant
ENSG00000105737	202.59	0.863376	0.384819	2.24359	0.024859	0.105055	GRIK5	Not Significant
ENSG00000147684	771.641	0.863361	0.449743	1.91968	0.0548987	0.174507	NDUFB9	Not Significant
ENSG00000101057	1147.28	0.863125	0.323449	2.66851	0.00761887	0.0485096	MYBL2	Enriched
ENSG00000180660	8.34378	0.863083	0.707732	1.2195	0.222653	NA	MAB21L1	Not Significant
ENSG00000171847	27.7311	0.863049	0.488078	1.76826	0.0770175	0.216376	FAM90A1	Not Significant
ENSG00000100395	159.468	0.862235	0.350725	2.45843	0.0139544	0.0724491	L3MBTL2	Not Significant
ENSG00000170545	51.806	0.862029	0.463828	1.85851	0.0630968	0.190548	SMAGP	Not Significant
ENSG00000167646	22.4994	0.861187	0.597127	1.44222	0.149242	0.329836	DNAAF3	Not Significant
ENSG00000164687	328.395	0.860795	0.456612	1.88518	0.0594059	0.183316	FABP5	Not Significant
ENSG00000160799	206.103	0.860576	0.378015	2.27657	0.0228122	0.0989717	CCDC12	Not Significant
ENSG00000185000	126.753	0.860561	0.448527	1.91864	0.0550302	0.174706	DGAT1	Not Significant
ENSG00000103653	1367.83	0.860514	0.363226	2.36909	0.0178319	0.0853477	CSK	Not Significant
ENSG00000143554	17.0204	0.860279	0.533822	1.61154	0.107061	0.265994	SLC27A3	Not Significant
ENSG00000064601	187.23	0.860128	0.474577	1.81241	0.0699228	0.203401	CTSA	Not Significant
ENSG00000121797	77.9447	0.860067	0.320612	2.68258	0.00730566	0.0471327	CCRL2	Enriched
ENSG00000143294	702.944	0.859511	0.373717	2.2999	0.0214541	0.09537	PRCC	Not Significant
ENSG00000203950	53.5083	0.859494	0.63709	1.34909	0.177307	0.366948	RTL8A	Not Significant
ENSG00000137154	28352.3	0.859049	0.420598	2.04245	0.0411071	0.145677	RPS6	Not Significant
ENSG00000163482	28.7046	0.858922	0.560019	1.53374	0.125095	0.294188	STK36	Not Significant
ENSG00000174721	79.7087	0.858771	0.36342	2.36303	0.0181263	0.0861173	FGFBP3	Not Significant
ENSG00000116729	190.399	0.858685	0.376876	2.27843	0.0227011	0.098661	WLS	Not Significant
ENSG00000130734	147.326	0.858212	0.45372	1.8915	0.0585573	0.181999	ATG4D	Not Significant
ENSG00000019102	99.4483	0.858142	0.342486	2.50562	0.0122235	0.0659516	VSIG2	Not Significant
ENSG00000256235	215.036	0.857922	0.546461	1.56996	0.116424	0.281738	SMIM3	Not Significant
ENSG00000147955	530.644	0.857773	0.326186	2.6297	0.00854594	0.052494	SIGMAR1	Not Significant
ENSG00000241553	364.026	0.857772	0.515513	1.66392	0.0961285	0.248981	ARPC4	Not Significant
ENSG00000197114	22.542	0.856639	0.465231	1.84132	0.0655749	0.195547	ZGPAT	Not Significant
ENSG00000132646	931.678	0.856526	0.432641	1.97976	0.0477301	0.159606	PCNA	Not Significant
ENSG00000167565	75.4662	0.856158	0.394765	2.16878	0.0300993	0.118797	SERTAD3	Not Significant
ENSG00000010295	111.7	0.856082	0.286886	2.98405	0.00284463	0.0253597	IFFO1	Enriched
ENSG00000090776	150.379	0.855857	0.377557	2.26683	0.0234007	0.100806	EFNB1	Not Significant
ENSG00000168894	108.958	0.855742	0.411201	2.08108	0.0374267	0.13724	RNF181	Not Significant
ENSG00000075336	273.303	0.855705	0.355194	2.40912	0.015991	0.0791028	TIMM21	Not Significant
ENSG00000125450	374.819	0.855578	0.260303	3.28686	0.00101312	0.0124719	NUP85	Enriched
ENSG00000170619	141.463	0.855501	0.490041	1.74577	0.0808502	0.223542	COMMD5	Not Significant
ENSG00000131871	382.272	0.855438	0.283351	3.01901	0.00253604	0.0233428	SELENOS	Enriched
ENSG00000137522	189.349	0.855126	0.306038	2.79418	0.00520314	0.0380362	RNF121	Enriched
ENSG00000148248	955.152	0.855062	0.451108	1.89547	0.0580297	0.180836	SURF4	Not Significant
ENSG00000109390	61.2108	0.855041	0.545635	1.56706	0.117101	0.282788	NDUFC1	Not Significant
ENSG00000267493	10.576	0.855035	0.723251	1.18221	0.237122	0.437718	CIRBP-AS1	Not Significant
ENSG00000160783	70.4626	0.85498	0.50959	1.67778	0.0933903	0.244678	PMF1	Not Significant
ENSG00000101546	126.906	0.854807	0.287895	2.96917	0.00298608	0.0260693	RBFA	Enriched
ENSG00000204946	193.707	0.854798	0.282258	3.02843	0.00245832	0.0228944	ZNF783	Enriched
ENSG00000179262	638.74	0.853387	0.313453	2.72253	0.00647838	0.0437356	RAD23A	Enriched
ENSG00000112159	31185.9	0.853272	0.615022	1.38738	0.165325	0.351409	MDN1	Not Significant
ENSG00000114125	195.757	0.853215	0.511404	1.66838	0.0952404	0.247665	RNF7	Not Significant
ENSG00000159063	327.217	0.852861	0.362996	2.34951	0.0187983	0.087809	ALG8	Not Significant
ENSG00000011009	251.15	0.85238	0.481019	1.77203	0.0763896	0.215217	LYPLA2	Not Significant
ENSG00000117385	545.255	0.852329	0.279223	3.05251	0.00226939	0.0215772	P3H1	Enriched
ENSG00000135763	1887.1	0.851951	0.317023	2.68735	0.00720217	0.0467772	URB2	Enriched
ENSG00000105072	28.9646	0.851245	0.38805	2.19365	0.0282608	0.114223	C19orf44	Not Significant
ENSG00000010704	14.9781	0.850978	0.55008	1.54701	0.121861	0.289525	HFE	Not Significant
ENSG00000275464	1234.18	0.850964	0.341401	2.49256	0.0126825	0.0678069	LOC102724159	Not Significant
ENSG00000179950	1226.75	0.850875	0.261317	3.2561	0.00112953	0.0133883	PUF60	Enriched
ENSG00000161542	244.311	0.85086	0.296413	2.87052	0.00409793	0.0322373	PRPSAP1	Enriched
ENSG00000130725	557.954	0.850721	0.403595	2.10786	0.0350432	0.131359	UBE2M	Not Significant
ENSG00000188130	124.218	0.850139	0.544386	1.56165	0.118371	0.284462	MAPK12	Not Significant
ENSG00000172301	291.694	0.849434	0.517934	1.64004	0.100996	0.255954	COPRS	Not Significant
ENSG00000244363	12.6683	0.849351	0.553839	1.53357	0.125136	0.294188	RPL7P23	Not Significant
ENSG00000173457	724.21	0.849165	0.409544	2.07344	0.0381314	0.139144	PPP1R14B	Not Significant
ENSG00000101182	1592.67	0.848932	0.452402	1.8765	0.0605869	0.18532	PSMA7	Not Significant
ENSG00000130159	196.689	0.848879	0.316677	2.68058	0.00734948	0.0473156	ECSIT	Enriched
ENSG00000126106	27.0049	0.848519	0.479096	1.77109	0.0765465	0.215497	TMEM53	Not Significant
ENSG00000174227	421.458	0.848191	0.283483	2.99204	0.00277122	0.0248962	PIGG	Enriched
ENSG00000170315	1167.58	0.847474	0.482166	1.75764	0.0788089	0.219762	UBB	Not Significant
ENSG00000174586	10.4674	0.846933	0.796321	1.06356	0.287529	0.492204	ZNF497	Not Significant
ENSG00000167699	1142.31	0.846663	0.250997	3.3732	0.000743012	0.0101742	GLOD4	Enriched
ENSG00000127540	77.0466	0.846523	0.369832	2.28894	0.0220831	0.0970341	UQCR11	Not Significant
ENSG00000144120	193.405	0.846453	0.376234	2.24981	0.0244613	0.103961	TMEM177	Not Significant
ENSG00000117399	1605.73	0.846308	0.295642	2.86261	0.00420164	0.03271	CDC20	Enriched
ENSG00000253626	43.7957	0.846043	0.475078	1.78085	0.0749367	0.212803	EIF5AL1	Not Significant
ENSG00000105610	365.565	0.846005	0.325392	2.59996	0.00932347	0.0557035	KLF1	Not Significant
ENSG00000124155	283.581	0.845925	0.439066	1.92665	0.0540237	0.172567	PIGT	Not Significant
ENSG00000139343	340.015	0.845296	0.465598	1.8155	0.0694464	0.202702	SNRPF	Not Significant
ENSG00000120942	421.113	0.844257	0.369548	2.28457	0.0223383	0.0977206	UBIAD1	Not Significant
ENSG00000062485	2405.4	0.844203	0.257039	3.28434	0.00102221	0.0125631	CS	Enriched
ENSG00000126749	112.494	0.843638	0.380868	2.21504	0.0267573	0.110123	EMG1	Not Significant
ENSG00000134901	71.8208	0.843409	0.342027	2.46591	0.0136666	0.0714744	POGLUT2	Not Significant
ENSG00000183258	674.609	0.842878	0.253164	3.32937	0.000870422	0.0112316	DDX41	Enriched
ENSG00000119777	364.341	0.842842	0.260629	3.23387	0.00122124	0.0141093	TMEM214	Enriched
ENSG00000134248	205.929	0.842701	0.439025	1.91948	0.0549231	0.174548	LAMTOR5	Not Significant
ENSG00000150787	76.195	0.842552	0.62791	1.34183	0.17965	0.369698	PTS	Not Significant
ENSG00000162517	289.015	0.842311	0.303415	2.7761	0.00550152	0.0393934	PEF1	Enriched
ENSG00000126226	530.858	0.842136	0.348111	2.41916	0.0155564	0.0774411	PCID2	Not Significant
ENSG00000132507	3033.37	0.841689	0.475637	1.76961	0.0767929	0.215907	EIF5A	Not Significant
ENSG00000128309	146.365	0.841609	0.450312	1.86894	0.0616307	0.187101	MPST	Not Significant
ENSG00000054116	313.401	0.841598	0.405062	2.0777	0.0377369	0.138108	TRAPPC3	Not Significant
ENSG00000148339	124.776	0.841395	0.320713	2.62352	0.00870268	0.053217	SLC25A25	Not Significant
ENSG00000114544	199.303	0.84111	0.309325	2.71918	0.00654437	0.0439831	SLC41A3	Enriched
ENSG00000205629	86.5844	0.84062	0.468892	1.79278	0.0730085	0.20935	LCMT1	Not Significant
ENSG00000176393	470.862	0.840329	0.241502	3.4796	0.000502164	0.00779274	RNPEP	Enriched
ENSG00000141349	237.627	0.840239	0.353322	2.37811	0.0174015	0.0838697	G6PC3	Not Significant
ENSG00000255561	60.8353	0.839717	0.419704	2.00073	0.0454211	0.154783	FDXACB1	Not Significant
ENSG00000177239	188.183	0.839651	0.317307	2.64618	0.00814069	0.0508589	MAN1B1	Not Significant
ENSG00000161267	367.461	0.83939	0.273178	3.07268	0.00212145	0.0206418	BDH1	Enriched
ENSG00000117411	460.746	0.839338	0.294233	2.85263	0.00433585	0.033425	B4GALT2	Enriched
ENSG00000100372	1493.49	0.839274	0.256223	3.27556	0.00105452	0.0128654	SLC25A17	Enriched
ENSG00000101146	276.046	0.839109	0.255216	3.28784	0.00100958	0.0124607	RAE1	Enriched
ENSG00000185324	97.5503	0.838694	0.435472	1.92594	0.0541115	0.172811	CDK10	Not Significant
ENSG00000078804	87.4786	0.838305	0.343485	2.44059	0.0146635	0.0746061	TP53INP2	Not Significant
ENSG00000117408	321.134	0.838255	0.327606	2.55873	0.0105055	0.059939	IPO13	Not Significant
ENSG00000148303	15591.2	0.838047	0.345209	2.42765	0.015197	0.076298	RPL7A	Not Significant
ENSG00000157916	749.77	0.837583	0.27679	3.02606	0.00247767	0.0229923	RER1	Enriched
ENSG00000119688	88.4658	0.837551	0.32659	2.56454	0.0103314	0.0593519	ABCD4	Not Significant
ENSG00000111886	17.0917	0.837342	0.520427	1.60895	0.107627	0.266868	GABRR2	Not Significant
ENSG00000144029	28.6006	0.836938	0.453125	1.84704	0.0647417	0.193837	MRPS5	Not Significant
ENSG00000100325	450.92	0.8367	0.268781	3.11294	0.00185231	0.0189322	ASCC2	Enriched
ENSG00000234335	38.1239	0.836578	0.39159	2.13636	0.03265	0.125208	RPS4XP11	Not Significant
ENSG00000168872	184.468	0.836259	0.271537	3.07972	0.00207196	0.0203318	DDX19A	Enriched
ENSG00000180035	136.534	0.835512	0.306629	2.72483	0.00643351	0.0435308	ZNF48	Enriched
ENSG00000105552	220.312	0.835358	0.270585	3.08723	0.00202034	0.0199641	BCAT2	Enriched
ENSG00000185298	782.077	0.835291	0.310824	2.68735	0.00720224	0.0467772	CCDC137	Enriched
ENSG00000135632	365.027	0.835087	0.355635	2.34816	0.0188666	0.0879725	SMYD5	Not Significant
ENSG00000131100	261.985	0.834608	0.352912	2.36492	0.018034	0.0859327	ATP6V1E1	Not Significant
ENSG00000114388	110.554	0.834176	0.382285	2.18208	0.0291038	0.116228	NPRL2	Not Significant
ENSG00000032389	269.276	0.833883	0.35602	2.34224	0.0191684	0.0888443	EIPR1	Not Significant
ENSG00000111669	3042.64	0.833874	0.265401	3.14194	0.00167831	0.0175976	TPI1	Enriched
ENSG00000143740	174.66	0.833693	0.402744	2.07003	0.0384492	0.139861	SNAP47	Not Significant
ENSG00000127445	392.299	0.833117	0.456442	1.82524	0.0679646	0.199816	PIN1	Not Significant
ENSG00000134470	32.1512	0.832811	0.475797	1.75035	0.0800581	0.222048	IL15RA	Not Significant
ENSG00000140395	174.958	0.832671	0.361622	2.3026	0.0213014	0.0949729	SKIC8	Not Significant
ENSG00000188092	30.6747	0.832563	0.447914	1.85876	0.0630619	0.19052	GPR89B	Not Significant
ENSG00000106636	323.858	0.832135	0.307128	2.7094	0.00674043	0.0447962	YKT6	Enriched
ENSG00000179041	299.114	0.831923	0.293223	2.83717	0.00455155	0.0346426	RRS1	Enriched
ENSG00000162076	76.2654	0.831474	0.524259	1.586	0.112739	0.275446	FLYWCH2	Not Significant
ENSG00000063176	129.041	0.831466	0.47657	1.74469	0.0810394	0.223776	SPHK2	Not Significant
ENSG00000108312	2113.41	0.83086	0.254529	3.2643	0.00109734	0.0131747	UBTF	Enriched
ENSG00000169188	309.009	0.83063	0.283127	2.93377	0.00334869	0.0282716	APEX2	Enriched
ENSG00000165655	37.9047	0.830466	0.481396	1.72512	0.0845057	0.229876	ZNF503	Not Significant
ENSG00000123159	283.747	0.830402	0.361876	2.29471	0.0217496	0.0961987	GIPC1	Not Significant
ENSG00000010803	638.013	0.829786	0.25928	3.20034	0.00137264	0.0153592	SCMH1	Enriched
ENSG00000004866	93.6423	0.829753	0.295442	2.80852	0.00497701	0.0367975	ST7	Enriched
ENSG00000102125	30.4448	0.829644	0.434064	1.91134	0.0559608	0.176703	TAFAZZIN	Not Significant
ENSG00000125149	49.7012	0.829051	0.382165	2.16935	0.0300558	0.118706	PHAF1	Not Significant
ENSG00000101346	2811.69	0.828878	0.208934	3.96718	7.27278e-05	0.0018932	POFUT1	Enriched
ENSG00000137700	519.041	0.828851	0.314026	2.63943	0.00830455	0.0515203	SLC37A4	Not Significant
ENSG00000105518	9.97087	0.828401	0.628976	1.31706	0.187817	0.379328	TMEM205	Not Significant
ENSG00000135124	19.3153	0.828282	0.601052	1.37806	0.168186	0.355332	P2RX4	Not Significant
ENSG00000070047	1494.12	0.828071	0.300513	2.75552	0.00585982	0.0410379	PHRF1	Enriched
ENSG00000078061	227.589	0.827999	0.379211	2.18348	0.0290007	0.115926	ARAF	Not Significant
ENSG00000169884	33.9228	0.827274	0.474101	1.74493	0.0809966	0.22374	WNT10B	Not Significant
ENSG00000232112	57.2821	0.827072	0.439608	1.88138	0.0599198	0.184144	TMA7	Not Significant
ENSG00000134375	874.169	0.826743	0.413351	2.0001	0.0454896	0.154981	TIMM17A	Not Significant
ENSG00000232860	16.0561	0.825897	0.505408	1.63412	0.102234	0.25776	SMG7-AS1	Not Significant
ENSG00000116133	4968.74	0.825439	0.282083	2.92623	0.00343096	0.0287396	DHCR24	Enriched
ENSG00000106263	8176.08	0.82537	0.357644	2.3078	0.0210102	0.0940942	EIF3B	Not Significant
ENSG00000130299	163.873	0.82522	0.345061	2.39152	0.0167789	0.0818807	GTPBP3	Not Significant
ENSG00000100124	103.012	0.824969	0.33428	2.4679	0.0135909	0.0711527	ANKRD54	Not Significant
ENSG00000143761	2272.16	0.824609	0.3283	2.51175	0.0120133	0.065424	ARF1	Not Significant
ENSG00000171530	305.396	0.824484	0.433998	1.89974	0.0574668	0.179662	TBCA	Not Significant
ENSG00000143153	220.663	0.824195	0.299447	2.75239	0.00591613	0.041278	ATP1B1	Enriched
ENSG00000088899	19.3477	0.823944	0.612755	1.34465	0.178737	0.368635	LZTS3	Not Significant
ENSG00000145945	28.8489	0.823874	0.415862	1.98112	0.0475777	0.159343	FAM50B	Not Significant
ENSG00000135956	388.171	0.823686	0.336165	2.45024	0.0142759	0.0734316	TMEM127	Not Significant
ENSG00000110442	71.8004	0.823584	0.434273	1.89647	0.0578984	0.180672	COMMD9	Not Significant
ENSG00000232388	69.2547	0.823557	0.466565	1.76515	0.0775385	0.21727	SMIM26	Not Significant
ENSG00000264920	13.6545	0.823523	0.613769	1.34175	0.179678	0.369698	SP2-DT	Not Significant
ENSG00000214530	14.2265	0.823064	0.515773	1.59579	0.110536	0.271791	STARD10	Not Significant
ENSG00000142089	191.515	0.822858	0.385439	2.13486	0.0327724	0.125515	IFITM3	Not Significant
ENSG00000260942	11.6875	0.822292	0.580085	1.41754	0.156326	0.339605	CAPN10-DT	Not Significant
ENSG00000214376	9.29384	0.82218	0.635467	1.29382	0.195727	0.388552	VSTM5	Not Significant
ENSG00000291129	11.1146	0.82216	0.671692	1.22401	0.220947	0.420167	PPIEL	Not Significant
ENSG00000077327	64.8403	0.822078	0.370083	2.22133	0.0263283	0.108919	SPAG6	Not Significant
ENSG00000135587	50.0689	0.821013	0.471989	1.73948	0.0819512	0.225257	SMPD2	Not Significant
ENSG00000213588	147.915	0.821012	0.323737	2.53604	0.0112112	0.062386	ZBTB9	Not Significant
ENSG00000185198	47.7061	0.820462	0.566296	1.44882	0.147387	0.327251	PRSS57	Not Significant
ENSG00000161036	70.6111	0.820385	0.348462	2.3543	0.0185576	0.0872539	LRWD1	Not Significant
ENSG00000175764	98.2472	0.820249	0.354649	2.31285	0.0207309	0.0934336	TTLL11	Not Significant
ENSG00000126264	22.6686	0.820163	0.543168	1.50996	0.131053	0.303149	HCST	Not Significant
ENSG00000179943	160.502	0.81971	0.429223	1.90975	0.0561651	0.177143	FIZ1	Not Significant
ENSG00000167272	70.7299	0.819474	0.670104	1.2229	0.221366	0.4207	POP5	Not Significant
ENSG00000144867	1057.83	0.818818	0.295058	2.77511	0.00551835	0.0394951	SRPRB	Enriched
ENSG00000140961	9.98642	0.81845	0.598748	1.36694	0.171646	0.359759	OSGIN1	Not Significant
ENSG00000115446	116.073	0.818434	0.453929	1.803	0.0713881	0.206189	UNC50	Not Significant
ENSG00000106268	83.7113	0.818299	0.395454	2.06927	0.0385212	0.140021	NUDT1	Not Significant
ENSG00000103249	134.376	0.818211	0.324365	2.52251	0.0116522	0.064068	CLCN7	Not Significant
ENSG00000156853	248.438	0.817721	0.263624	3.10185	0.00192315	0.0192881	ZNF689	Enriched
ENSG00000137218	28.1411	0.81724	0.514328	1.58895	0.112072	0.274336	FRS3	Not Significant
ENSG00000102967	272.124	0.816667	0.286259	2.8529	0.00433227	0.0334146	DHODH	Enriched
ENSG00000137274	8.62356	0.816598	0.695177	1.17466	0.24013	NA	BPHL	Not Significant
ENSG00000152767	10.6434	0.81654	0.590638	1.38247	0.166828	0.353516	FARP1	Not Significant
ENSG00000183087	14.2716	0.81646	0.613056	1.33179	0.18293	0.373488	GAS6	Not Significant
ENSG00000168924	1367.54	0.816017	0.22245	3.66832	0.000244153	0.00455111	LETM1	Enriched
ENSG00000075234	50.6377	0.815572	0.392233	2.0793	0.0375895	0.137636	TTC38	Not Significant
ENSG00000116863	245.545	0.81499	0.313522	2.59946	0.00933695	0.055754	ADPRS	Not Significant
ENSG00000157168	18.3071	0.81492	0.519168	1.56967	0.116493	0.281816	NRG1	Not Significant
ENSG00000171914	113.876	0.81432	0.553875	1.47022	0.141502	0.319001	TLN2	Not Significant
ENSG00000204348	65.3618	0.813839	0.431922	1.88423	0.0595343	0.183424	DXO	Not Significant
ENSG00000069849	1337.5	0.813807	0.370288	2.19777	0.0279658	0.113483	ATP1B3	Not Significant
ENSG00000165804	54.7978	0.813129	0.468374	1.73607	0.0825517	0.226356	ZNF219	Not Significant
ENSG00000170638	207.902	0.812336	0.373698	2.17378	0.0297216	0.117802	TRABD	Not Significant
ENSG00000054611	128.889	0.812212	0.293885	2.76371	0.00571482	0.0404538	TBC1D22A	Enriched
ENSG00000131153	311.406	0.812049	0.379778	2.13822	0.0324988	0.124913	GINS2	Not Significant
ENSG00000125841	77.8136	0.811306	0.400418	2.02615	0.0427497	0.149417	NRSN2	Not Significant
ENSG00000108523	412.115	0.811205	0.429862	1.88713	0.0591426	0.182805	RNF167	Not Significant
ENSG00000186141	527.919	0.810807	0.26445	3.06601	0.00216933	0.020851	POLR3C	Enriched
ENSG00000100911	173.274	0.810371	0.35907	2.25686	0.0240169	0.102785	PSME2	Not Significant
ENSG00000143486	861.337	0.809895	0.262377	3.08676	0.00202349	0.0199641	EIF2D	Enriched
ENSG00000158470	1054.45	0.809175	0.401055	2.01762	0.0436313	0.151542	B4GALT5	Not Significant
ENSG00000109736	178.57	0.808973	0.277561	2.91458	0.00356166	0.0295047	MFSD10	Enriched
ENSG00000162396	303.79	0.808768	0.26277	3.07785	0.002085	0.0203798	PARS2	Enriched
ENSG00000266066	29.9593	0.808753	0.389652	2.07558	0.0379329	0.138551	POLRMTP1	Not Significant
ENSG00000143520	9.19342	0.808281	0.701007	1.15303	0.248899	0.450614	FLG2	Not Significant
ENSG00000166595	71.6204	0.807597	0.558175	1.44685	0.147938	0.328037	CIAO2B	Not Significant
ENSG00000157978	180.88	0.807444	0.352852	2.28833	0.0221181	0.0971383	LDLRAP1	Not Significant
ENSG00000148841	244.75	0.807104	0.294783	2.73796	0.00618207	0.0425592	ITPRIP	Enriched
ENSG00000168000	17.0057	0.806952	0.484685	1.6649	0.0959323	0.248645	BSCL2	Not Significant
ENSG00000143222	356.094	0.806831	0.317516	2.54107	0.0110514	0.0617808	UFC1	Not Significant
ENSG00000172530	110.147	0.806122	0.35803	2.25155	0.0243507	0.103667	BANP	Not Significant
ENSG00000133612	363.735	0.805778	0.278353	2.89481	0.00379389	0.0307656	AGAP3	Enriched
ENSG00000142185	52.5717	0.805385	0.49244	1.6355	0.101945	0.257334	TRPM2	Not Significant
ENSG00000104960	126.898	0.805353	0.325098	2.47726	0.0132394	0.0697265	PTOV1	Not Significant
ENSG00000106628	425.999	0.805165	0.288717	2.78877	0.00529091	0.0384145	POLD2	Enriched
ENSG00000149743	38.3861	0.805104	0.430566	1.86988	0.0615011	0.187048	TRPT1	Not Significant
ENSG00000166797	353.104	0.804939	0.566869	1.41997	0.155615	0.338706	CIAO2A	Not Significant
ENSG00000153066	180.298	0.804919	0.341329	2.35819	0.0183641	0.0867247	TXNDC11	Not Significant
ENSG00000224934	26.8401	0.804836	0.464302	1.73343	0.0830186	0.227274	GOT1-DT	Not Significant
ENSG00000103326	538.637	0.804725	0.35303	2.27948	0.0226386	0.098532	CAPN15	Not Significant
ENSG00000107281	104.587	0.804606	0.428249	1.87883	0.0602681	0.184665	NPDC1	Not Significant
ENSG00000166169	111.162	0.804422	0.299615	2.68485	0.00725618	0.0470061	POLL	Enriched
ENSG00000167815	175.623	0.803905	0.354476	2.26787	0.0233373	0.100609	PRDX2	Not Significant
ENSG00000153786	320.929	0.803687	0.290565	2.76595	0.00567574	0.0402755	ZDHHC7	Enriched
ENSG00000171853	358.462	0.803408	0.23244	3.45641	0.000547421	0.00825758	TRAPPC12	Enriched
ENSG00000154822	136.282	0.803391	0.466035	1.72389	0.0847283	0.230065	PLCL2	Not Significant
ENSG00000126249	62.3218	0.802835	0.422411	1.9006	0.0573539	0.179401	PDCD2L	Not Significant
ENSG00000118705	1664.35	0.80274	0.249254	3.22057	0.00127938	0.0146005	RPN2	Enriched
ENSG00000214756	37.249	0.802574	0.548384	1.46353	0.143324	0.321754	CSKMT	Not Significant
ENSG00000197747	154.653	0.802565	0.306254	2.62059	0.00877788	0.0534805	S100A10	Not Significant
ENSG00000131746	9.73767	0.802468	0.88109	0.910768	0.362418	0.56611	TNS4	Not Significant
[truncated: 11,246 more rows]
